# Supplementary material for: A pyridine-boryl radical mediated cascade reaction towards the synthesis of indolizines: a computational mechanistic analysis
Source: Royal Society of Chemistry journal article supplement (doi:10.1039/d4qo00558a), 2024-01-01
Supplement: d4qo00558a1.pdf [file d4qo00558a1.pdf]

## Supporting Information

# A pyridine-boryl radical mediated cascade reaction towards the synthesis of indolizines: a computational mechanistic analysis

Xinyu Zhang,<sup>a</sup> Xiangxue Cao,<sup>a</sup> Lanfeng Wei,<sup>b</sup> Zhijun Wang,<sup>a</sup> Yu Wei,<sup>a,\*</sup> Liang Xu,<sup>a,\*</sup> Genping Huang<sup>c,\*</sup>

<sup>a</sup> School of Chemistry and Chemical Engineering/State Key Laboratory Incubation Base for Green Processing of Chemical Engineering, Shihezi University, Shihezi, 832003, P. R. China. E-mail: xuliang4423@shzu.edu.cn

<sup>b</sup> Xinjiang Key Laboratory of Coal Mine Disasters Intelligent Prevention and Emergency Response, Xinjiang Institute of Engineering, Urumqi 830023, China E-mail: 1193631044@qq.com

<sup>c</sup> Department of Chemistry, School of Science and Tianjin Key Laboratory of Molecular Optoelectronic Sciences, Tianjin University, Tianjin 300072, P. R. China. E-mail: [gphuang@tju.edu.cn](mailto:gphuang@tju.edu.cn)

## Table of Contents

|                                                                                                                                                        |    |
|--------------------------------------------------------------------------------------------------------------------------------------------------------|----|
| 1. The reaction mechanism for the B <sub>2</sub> pin <sub>2</sub> -mediated cyclization/aromatization to construct indolizine .....                    | 3  |
| 1.1 The complete potential energy surface of a radical addition pathway (path a) .....                                                                 | 3  |
| 1.2 Transition states of Py-[B]· and ketyl radical cross-coupling .....                                                                                | 4  |
| 1.3 1,3-Amine elimination facilitated by H-shuttle .....                                                                                               | 5  |
| 1.4 Spin density analysis .....                                                                                                                        | 5  |
| 1.5 The other possible reaction pathways starting from INT3 .....                                                                                      | 7  |
| 1.6 The other possible reaction pathways starting from INT4 .....                                                                                      | 8  |
| 1.7 Structures of important intermediates and transition states .....                                                                                  | 10 |
| 2. The reaction mechanism for the B <sub>2</sub> pin <sub>2</sub> -mediated cyclization/ aromatization to construct pyrrolo[2,1,5-cd]indolizines ..... | 13 |
| 2.1 B <sub>2</sub> pin <sub>2</sub> -mediated cyclization/aromatization to construct pyrrolo[2,1,5-cd]indolizine .....                                 | 13 |
| 2.2 Ring opening of cyclopropane and radical-radical cross-coupling .....                                                                              | 13 |
| 2.3 H-shuttle assisted removal of the O[B] moiety and 1,2-amine elimination processes .....                                                            | 13 |
| 2.4 Other H-shuttle assisted removal of the O[B] moiety pathways .....                                                                                 | 17 |
| 2.5 Other 1,4-H shift pathways facilitated by “water bridge” or “alcohol bridge” .....                                                                 | 18 |
| 2.6 Other elimination pathways of amines facilitated by “water bridge” and “alcohol bridge” .....                                                      | 19 |
| 2.7 Spin density analysis .....                                                                                                                        | 19 |
| 2.8 Structures of important intermediates and transition states .....                                                                                  | 20 |
| 3 Control experiment .....                                                                                                                             | 24 |
| 4. NMR Spectra of 4 .....                                                                                                                              | 24 |
| 5. The calculated energies and imaginary frequencies .....                                                                                             | 26 |
| 6. Cartesian coordinates .....                                                                                                                         | 32 |

# 1. The reaction mechanism for the B<sub>2</sub>pin<sub>2</sub>-mediated cyclization/aromatization to construct indolizine

## 1.1 The complete potential energy surface of a radical addition pathway (path a)

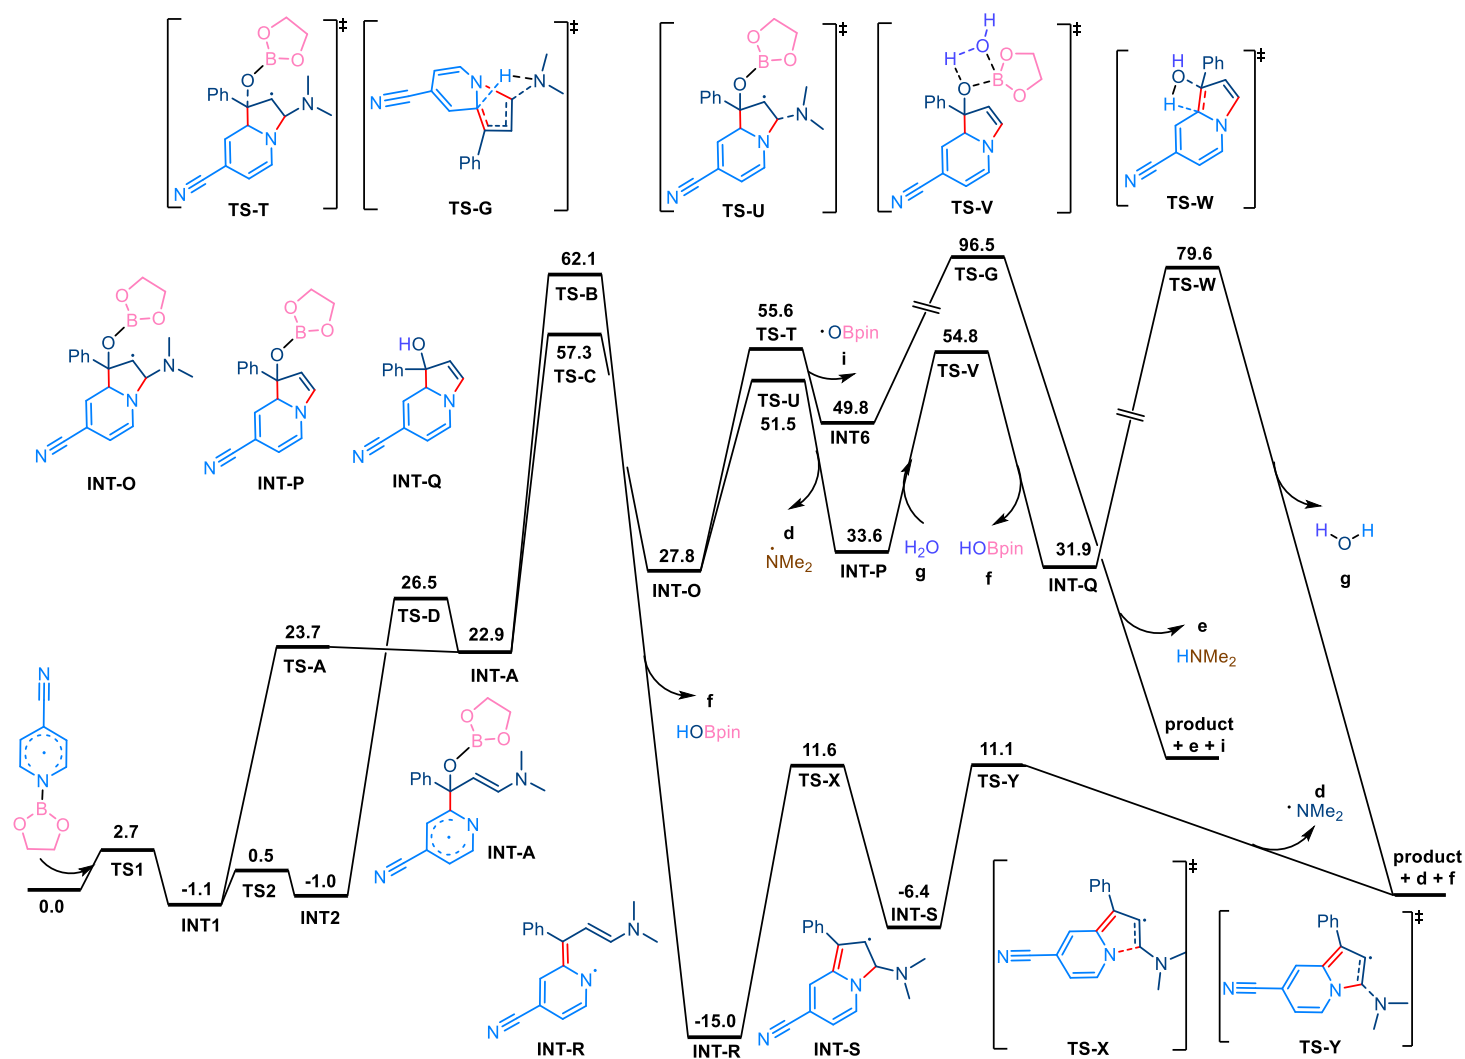

Figure S1 Radical addition pathway (path a). The repeated same structures with the manuscript were not shown.

We first performed theoretical calculations on the traditional Minisci-type radical addition route, however, it was ruled out due to the high barriers of TS-B and TS-C ( $\Delta G_{\text{INT1} \rightarrow \text{TS-B}^\ddagger} = 63.2$  kcal/mol,  $\Delta G_{\text{INT1} \rightarrow \text{TS-C}^\ddagger} = 58.4$  kcal/mol).

## 1.2 Transition states of Py-[B] $\cdot$ and ketyl radical cross-coupling

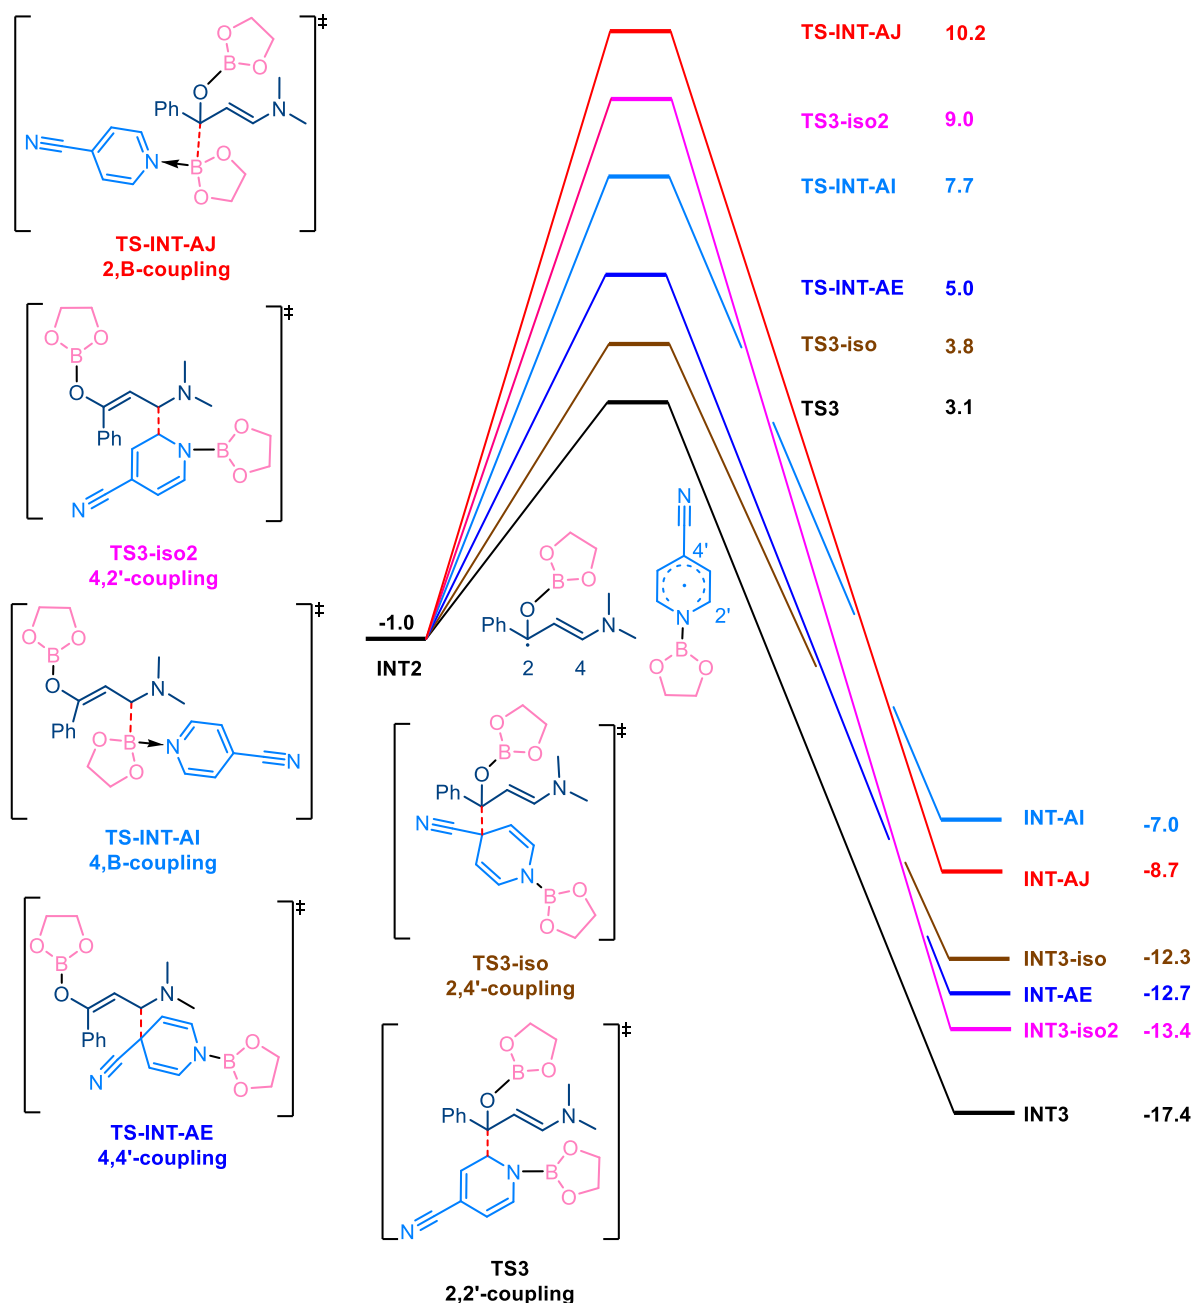

Figure S2 The possible pathways for radical-radical cross-coupling between Py-[B] $\cdot$  and ketyl radicals

These results suggested that 2,2'-coupling was the most favourable pathway for radical-radical cross-coupling, which was in consistency with experimental observations.

### 1.3 1,3-Amine elimination facilitated by H-shuttle

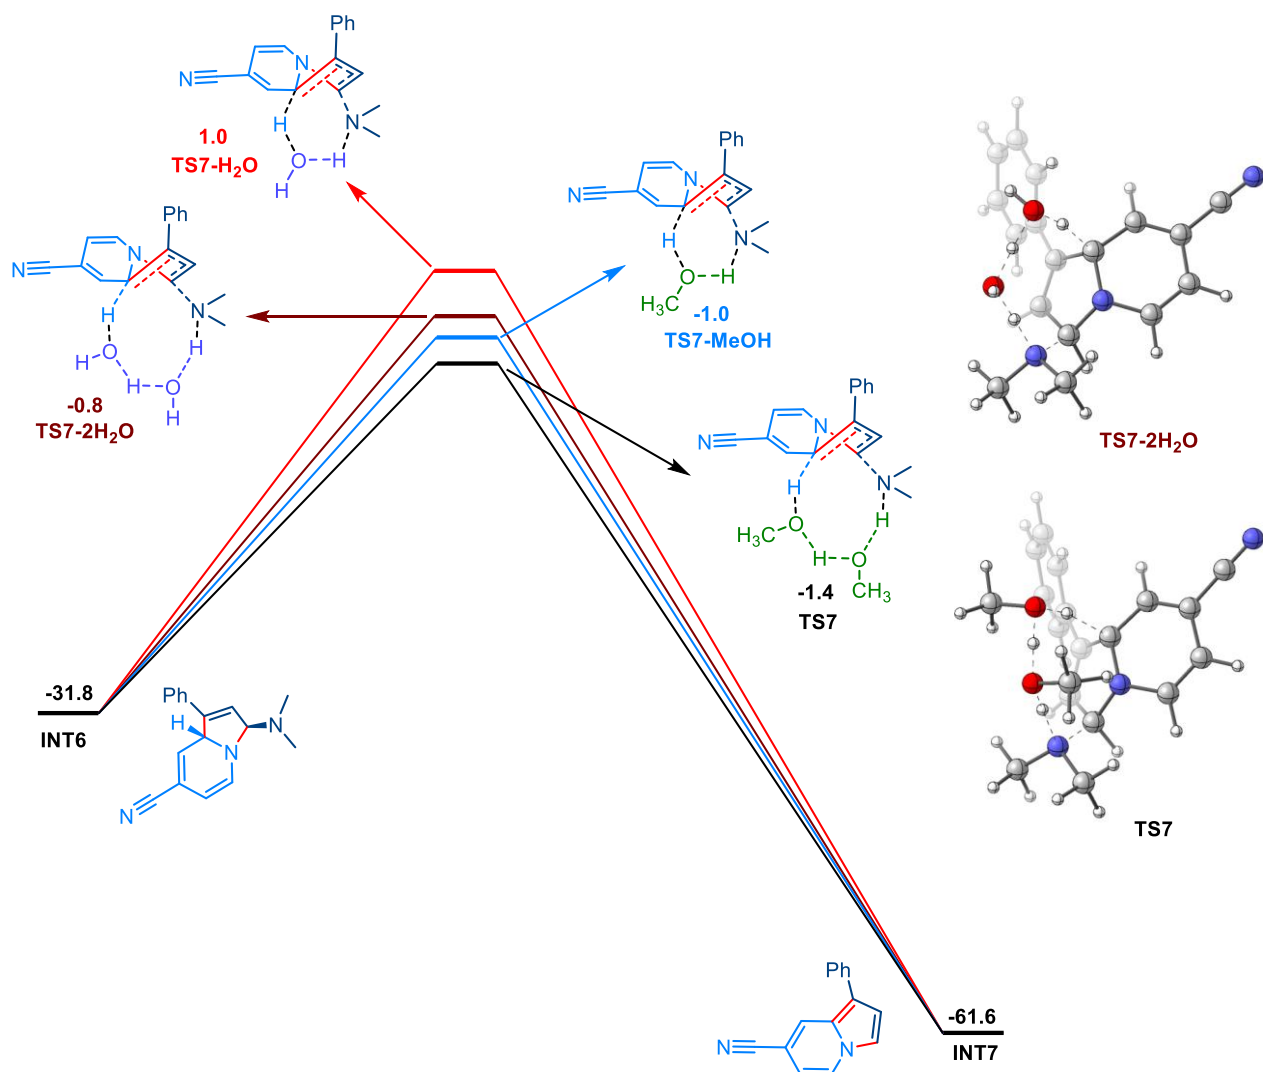

Figure S3 1,3-amine elimination pathways

DFT calculations indicate that, compared to the direct 1,3-amine elimination without the assistance of hydrogen-shuttle, the H-shuttle assisted 1,3-amine elimination process can significantly lower the barrier of the elimination process ( $\Delta G_{\text{INT6} \rightarrow \text{TS-G}^\ddagger} = 46.7$  kcal/mol,  $\Delta G_{\text{INT6} \rightarrow \text{TS7}^\ddagger} = 30.4$  kcal/mol,  $\Delta G_{\text{INT6} \rightarrow \text{TS7-2H}_2\text{O}^\ddagger} = 31.0$  kcal/mol,  $\Delta G_{\text{INT6} \rightarrow \text{TS8}^\ddagger} = 25.4$  kcal/mol), with the amine-bridge assisted elimination having the lowest barrier, followed by the alcohol bridge and then the water bridge.

### 1.4 Spin density analysis

Table S1 Spin density analysis of selected intermediates and transition states

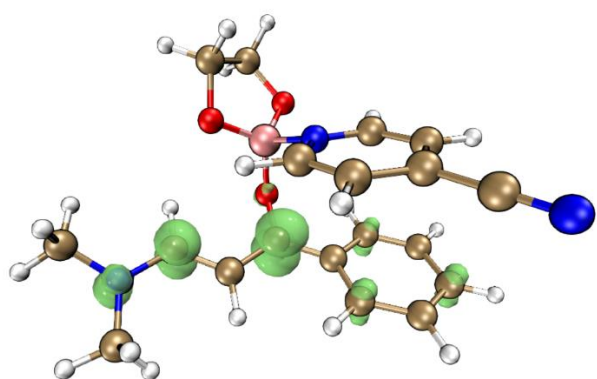

INT1

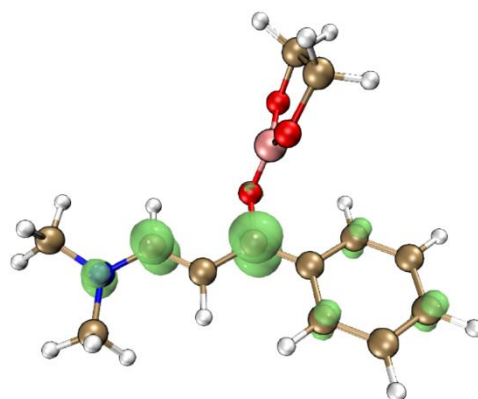

INT2

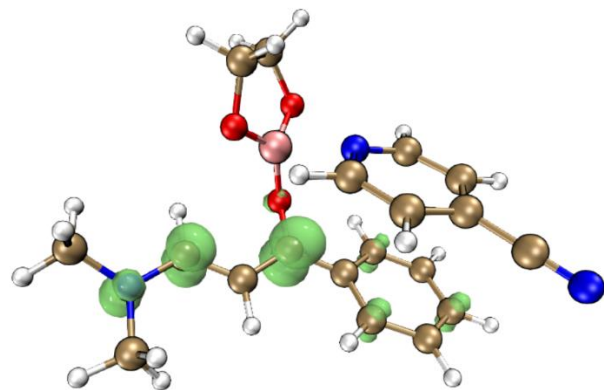

TS1

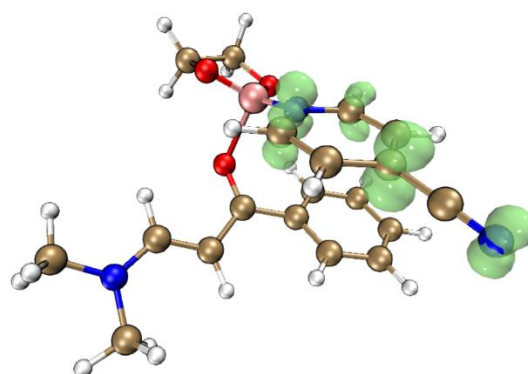

TS2

## 1.5 The other possible reaction pathways starting from INT3

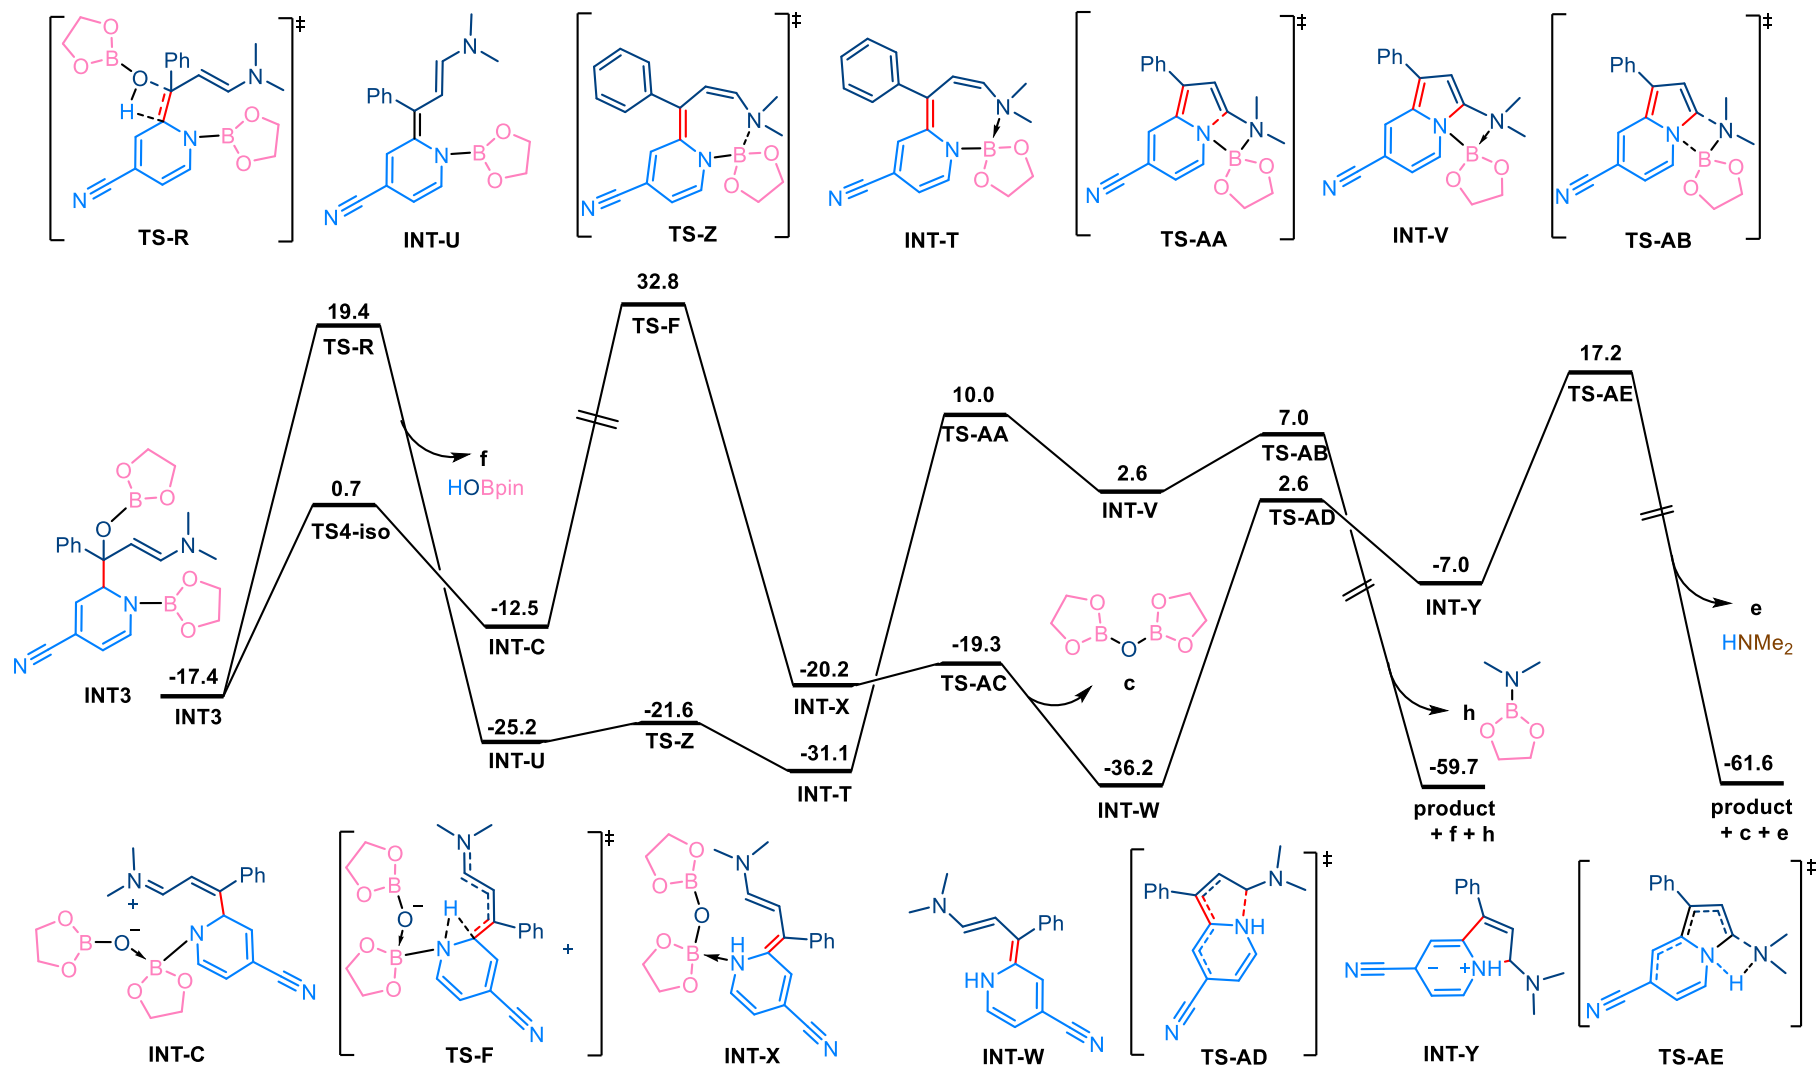

Figure S4 The other possible reaction pathways starting from INT3

Calculations identified additional possible pathways for the production of the final product from INT3. INT3 could generate INT-C via TS4-iso, with INT-C and INT4 being diastereoisomers. Due to the constraints of their spatial structures, INT-C could only undergo a 1,2-H shift process, followed by a cyclisation and 1,2-elimination of an amine to produce the final product. This pathway was excluded due to the high energy barrier at TS-F ( $\Delta G_{\text{INT3} \rightarrow \text{TS-F}}^{\ddagger} = 50.2$  kcal/mol).

Alternatively, INT3 could proceed by elimination of H[B], affording INT-U containing N-[B] motifs. The following coordination of the B atom by -NMe<sub>2</sub> would generate a cyclic structure, which might facilitate the formation of the cyclisation intermediate INT-V and the final elimination of [B]NMe<sub>2</sub> to afford the desired product. This pathway was also excluded due to the high energy barrier at TS-R ( $\Delta G_{\text{INT-3} \rightarrow \text{TS-R}}^\ddagger = 36.8$  kcal/mol) and TS-AA ( $\Delta G_{\text{INT-T} \rightarrow \text{TS-AA}}^\ddagger = 41.1$  kcal/mol).

### 1.6 The other possible reaction pathways starting from INT4

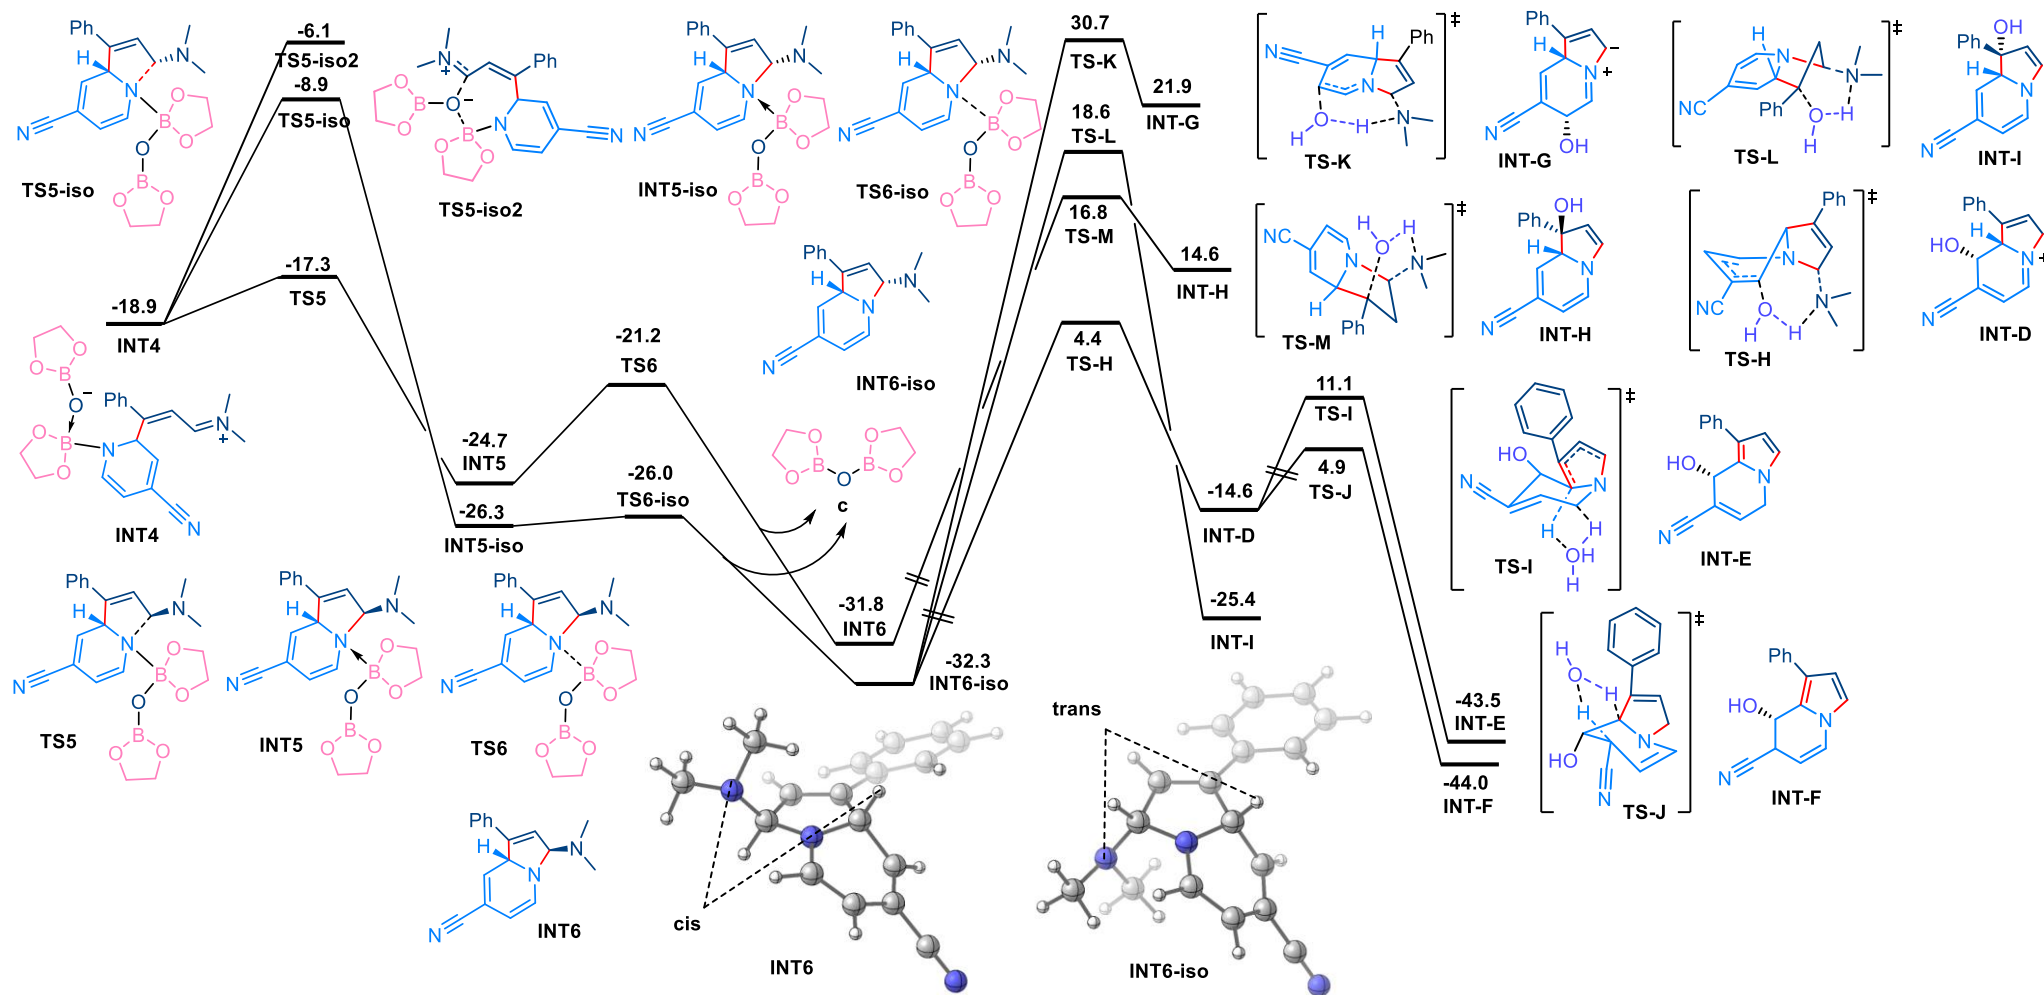

Figure S5 The other possible reaction pathways starting from INT4



Structures corresponding to the molecular weights detected by HRMS-ESI, as reported in the experimental literature, were calculated. INT6-iso can be generated via TS5-iso and TS6-iso, with these isomers containing NMe<sub>2</sub> and H on the opposite sides of the cyclised ring, preventing the direct elimination of amines. Subsequently, the possible pathways for the formation of byproducts from INT6-iso were explored. The pathway with the lowest energy barrier involved passing through TS-H and TS-J to generate INT-F, which corresponded to the molecular weight detected by HRMS-ESI. The highest energy barrier encountered in forming INT-F is  $\Delta G_{\text{INT6} \rightarrow \text{TS-H}^\ddagger} = 36.7$  kcal/mol. At a reaction temperature of 110 °C, it was plausible for the formation of a trace amount of INT-F.

## 1.7 Structures of important intermediates and transition states

Table S2 Structures of important intermediates and transition states

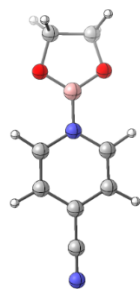

**a**

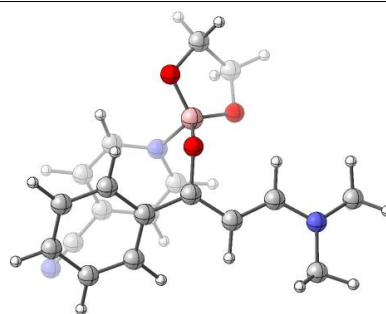

**INT1**

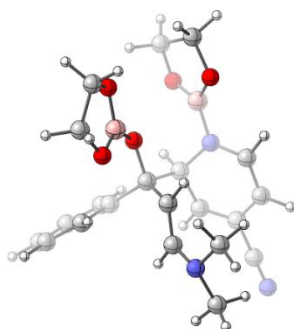

**INT2**

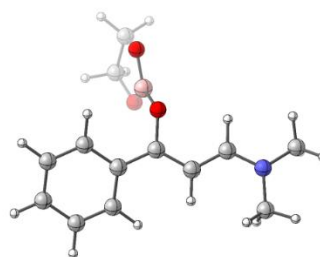

**INT3**

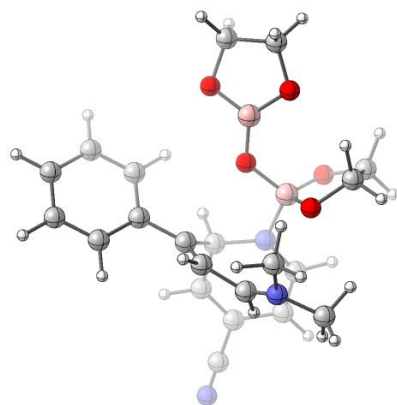

**INT4**

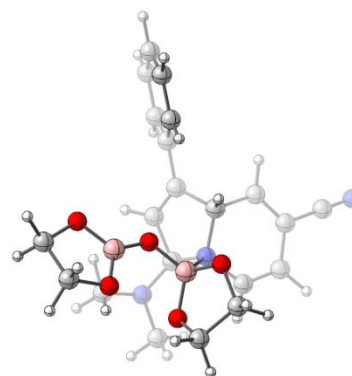

**INT5**

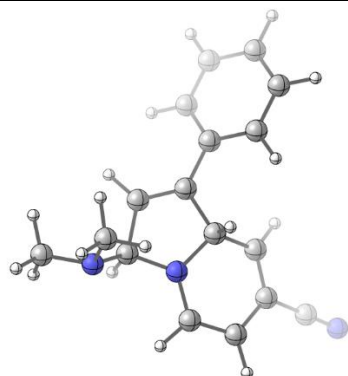

**INT6**

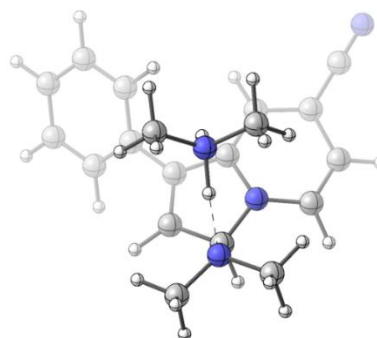

**INT7**

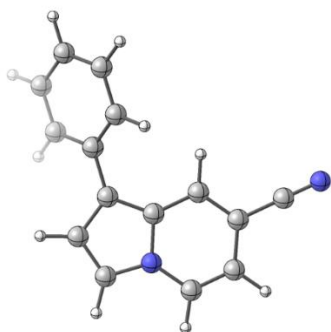

**INT8**

---

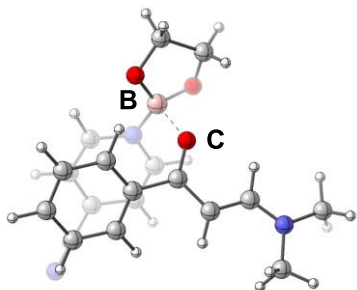

**TS1**  
B-O:1.91849

---

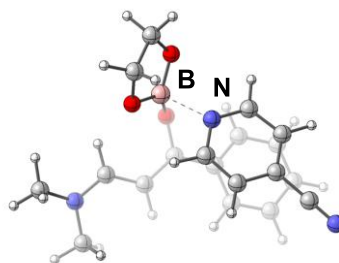

**TS2**  
B-N:2.20558

---

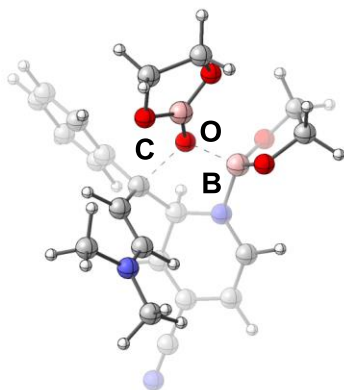

**TS3-1**  
C-O:1.86949  
B-O:1.60323

---

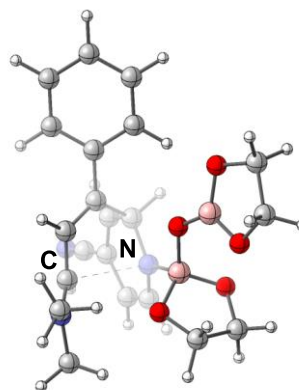

**TS4**  
C-N:2.53806

---

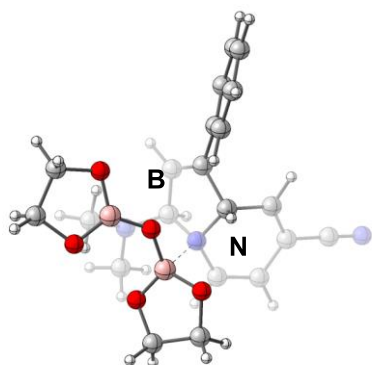

**TS5**  
B-N:2.10453

---

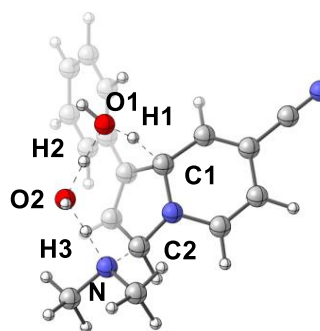

**TS6**  
C1-H1:1.50419  
H1-O1:1.14971  
O1-H2:1.21004  
H2-O2:1.18624  
O2-H2:1.18215

---

H3-N:1.30614  
N-C2:1.53513

---

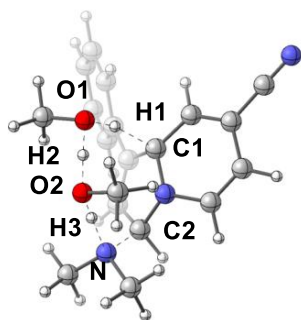

TS7

C1-H1:1.59599  
H1-O1:1.09818  
O1-H2:1.17219  
H2-O2:1.21604  
O2-H2:1.07935  
H3-N:1.47665  
N-C2:1.52552

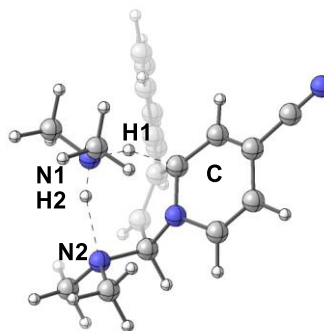

TS8

C-H1:1.52276  
H1-N1:1.20316  
N1-H2:1.05014  
H2-N2:1.85691

---

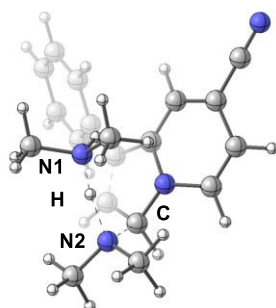

TS9

N1-H:1.16633  
H-N2:1.47041  
N2-C:1.56553

---

## 2. The reaction mechanism for the B<sub>2</sub>pin<sub>2</sub>-mediated cyclization/aromatization to construct pyrrolo[2,1,5-cd]indolizines

### 2.1 B<sub>2</sub>pin<sub>2</sub>-mediated cyclization/aromatization to construct pyrrolo[2,1,5-cd]indolizine

In addition to the cyclization/aromatization reaction of enaminones with pyridines, Huang group has shown that cyclopropyl-containing enaminones can undergo cascade reactions with pyridines to construct pyrrolo[2,1,5-cd]indolizines. DFT calculation was also performed to explore the detailed reaction mechanism of this cascade reaction.

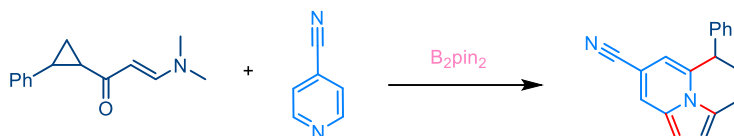

Figure S6 The construction of pyrrolo[2,1,5-cd]indolizines

### 2.2 Ring opening of cyclopropane and radical-radical cross-coupling

As shown in Figure S7, the ketyl radical intermediate **INT11** was obtained via stepwise boryl radical transfer processes, by virtue of the intermediation of four-coordinate boryl species **INT10**. The following ring opening of cyclopropane was realized via **TS12**, with an energy barrier of 11.5 kcal/mol relative to **INT11** ( $\Delta G_{\text{INT11} \rightarrow \text{TS-12}^\ddagger} = 11.5$  kcal/mol). The generated **INT12** was 2.3 kcal/mol more stabilized thermodynamically than **INT11**, probably due to the release of small-ring strain and the conjugated stabilization effect of benzylic radical species. Then, the radical-radical cross-coupling process could be realized via **TS-INT13** with an energy barrier of 3.1 kcal/mol ( $\Delta G_{\text{INT-12} \rightarrow \text{TS-INT13}^\ddagger} = 3.1$  kcal/mol), affording **INT13**, which was much more stabilized than **INT12** by 34.9 kcal/mol, making this process hardly reversible.

### 2.3 H-shuttle assisted removal of the O[B] moiety and 1,2-amine elimination processes

After the generation of intermediate **INT13** through radical-radical cross-coupling, as shown in Figure S8, the migration of the O[B] moiety to Py-[B] could be realized via **TS-AJ**. However, this transition state was calculated to be endothermic by 43.4 kcal/mol, relative to **INT13**. This high energy barrier made this transition state hard to reach, rendering us to find other pathways to remove the O[B] moiety.

Fortunately, H-shuttle was found to be capable of facilitating the removal. As depicted, **TS13**, containing H-shuttle consisting of three MeOH molecules, was more feasible than **TS-AJ** by 14.9 kcal/mol. Unlike the common H-shuttle that transfer an H atom along the molecular chain, **TS13** resembled a metathesis process. Via **TS13**, the boryl group on pyridines was connected to the methoxy of one MeOH, while the O[B] moiety was connected to the H atom at the other end of these three MeOH chain. By virtue of **TS13**, HO[B] and MeO[B] were generated simultaneously, with the latter MeO[B] still coordinated to pyridines. In the meanwhile, the zwitterionic intermediate **INT14**, containing iminium cation, borate inion and allene units, was obtained. This species was 27.0 kcal/mol more endothermic than **INT13**.

The following intramolecular nucleophilic attack of pyridyl N towards the internal C atom of the allene occurred via **TS15**, a facile transition state with a very low energy barrier of 3.6 kcal/mol. The IRC analysis showed MeO[B] would be released simultaneously during the cyclisation process, leading to **INT16**, which was 37.5 kcal/mol more exothermic than **INT14**. This implied the formation of **INT16** was irreversible.

Direct elimination of the amine via a metathesis process from **INT16** exhibited an extremely high energy barrier ( $\Delta G_{\text{INT16} \rightarrow \text{TS-AK}^\ddagger} = 94.6$  kcal/mol). Alternatively, **INT16** could undergo a H-shuttle assisted 1,4-H shift process to yield another zwitterionic species **INT17**. The rearomatization of pyridyl structure made **INT17** exothermic by 3.7 kcal/mol, relative to **INT16**.

Subsequently, the zwitterionic **INT17** underwent intramolecular nucleophilic attack to form **INT18** ( $\Delta G_{\text{INT17} \rightarrow \text{TS19}^\ddagger} = 25.0$  kcal/mol). Finally, the product was obtained via **TS20**, an H-shuttle assisted elimination of the amine transition state ( $\Delta G_{\text{INT18} \rightarrow \text{TS20}^\ddagger} = 24.4$  kcal/mol), because 1,2-elimination from **INT18** was found energetically unfeasible (**TS-AL**, 56.4 kcal/mol).

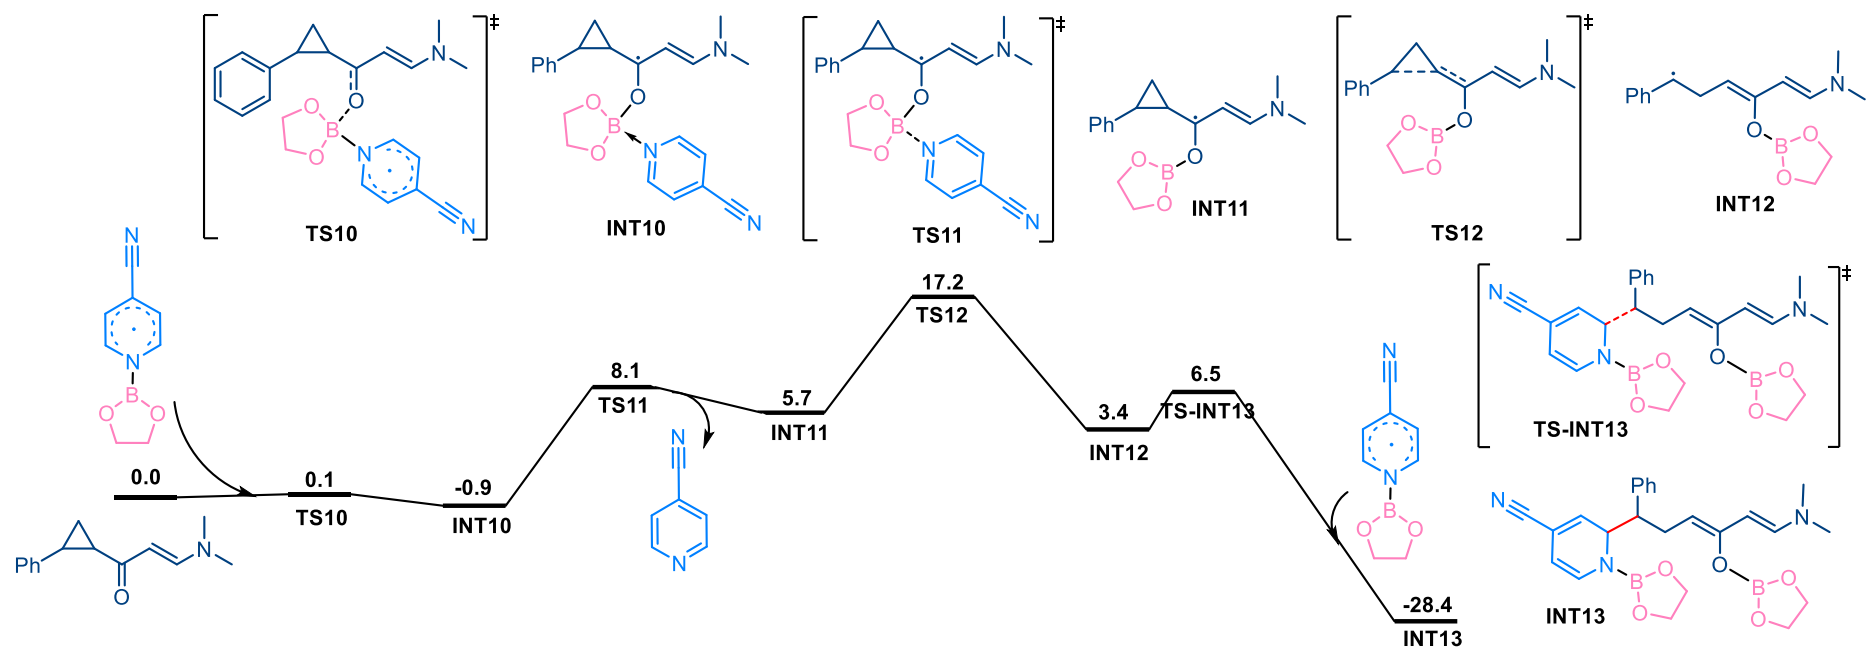

Figure S7 Ring opening of cyclopropane and radical-radical cross-coupling processes

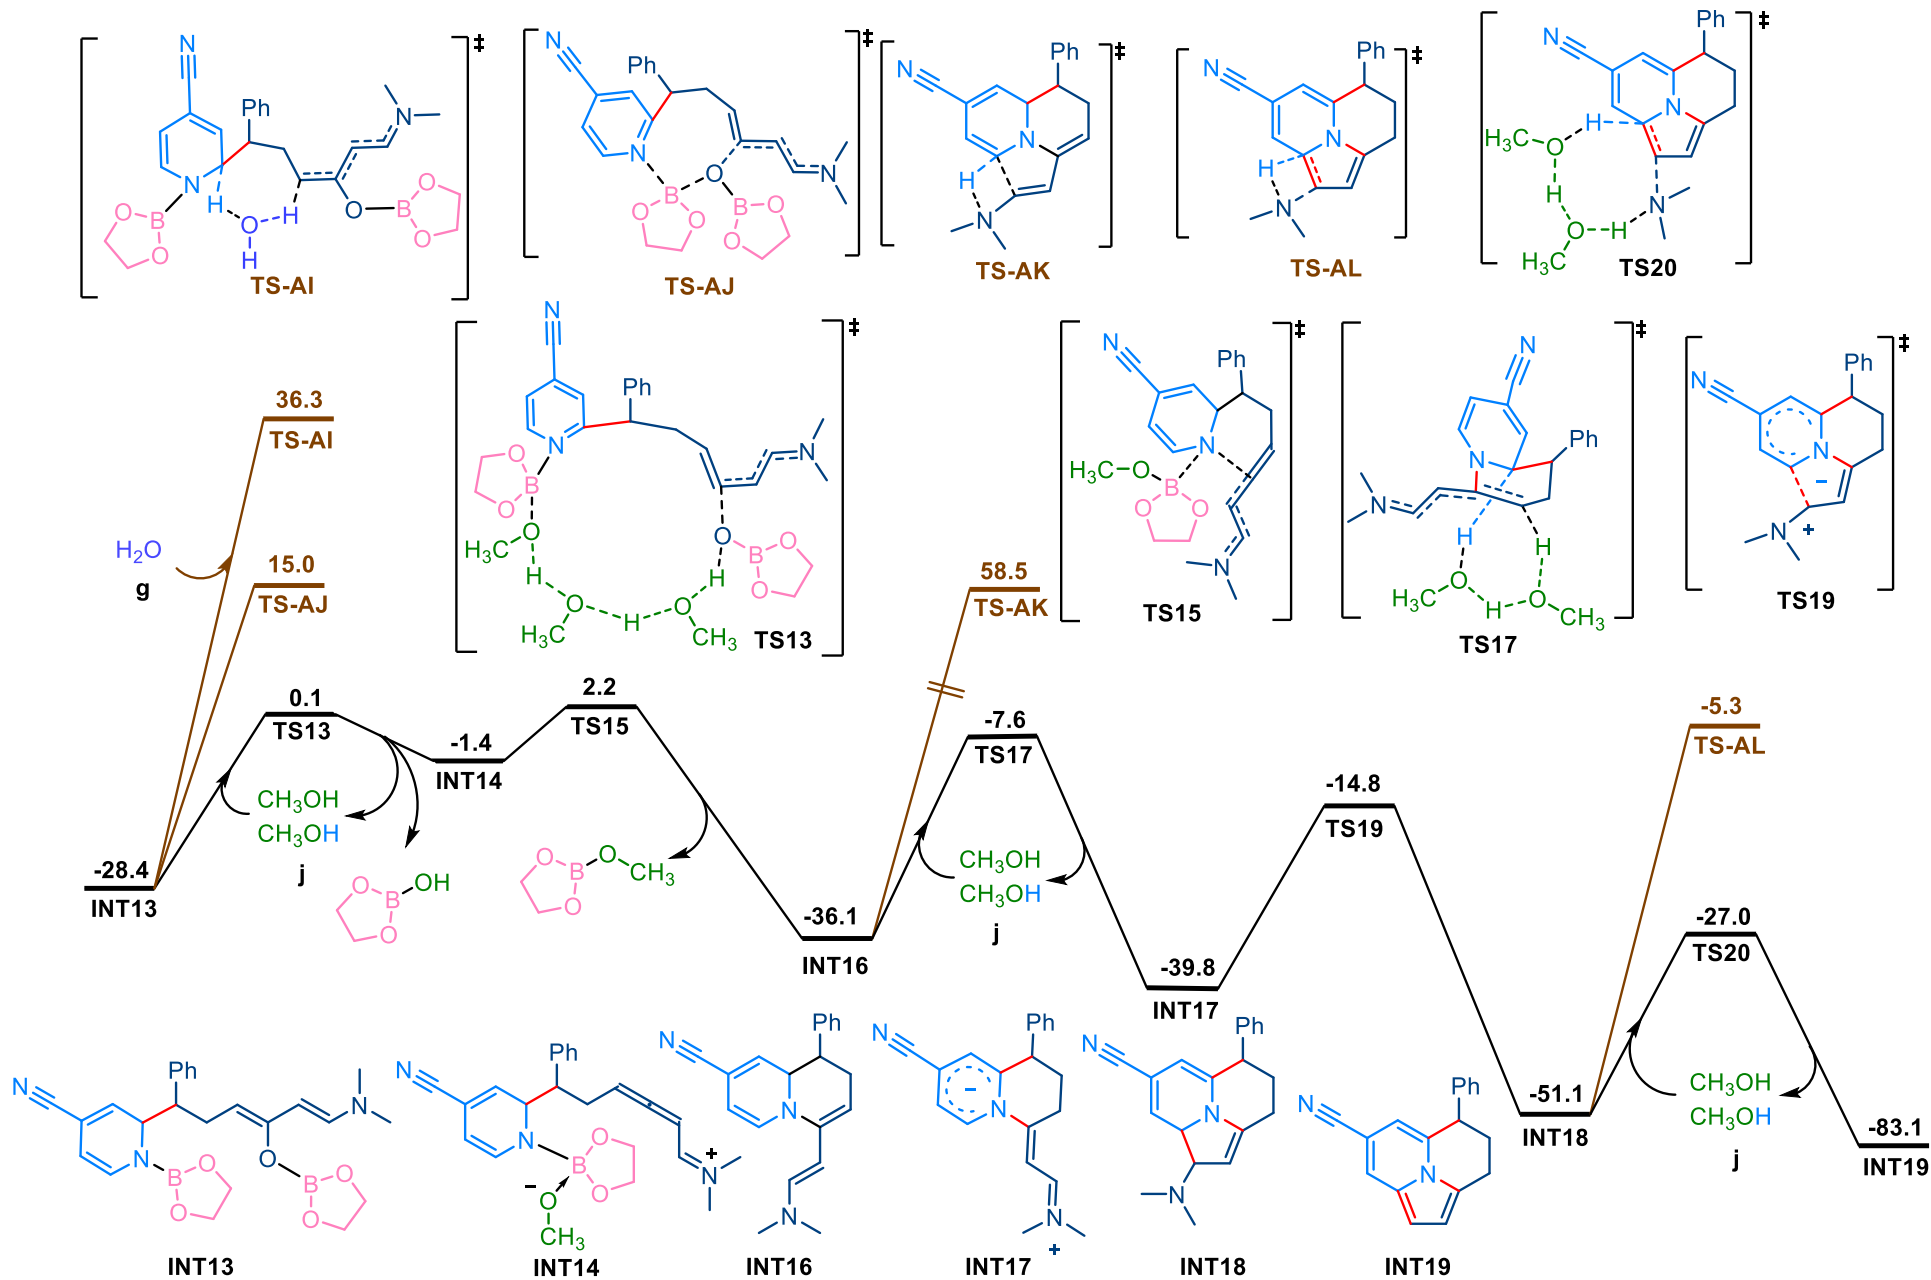

Figure S8 H-shuttle assisted removal of the O[B] moiety and 1,2-amine elimination processes  
S16



## 2.4 Other H-shuttle assisted removal of the O[B] moiety pathways

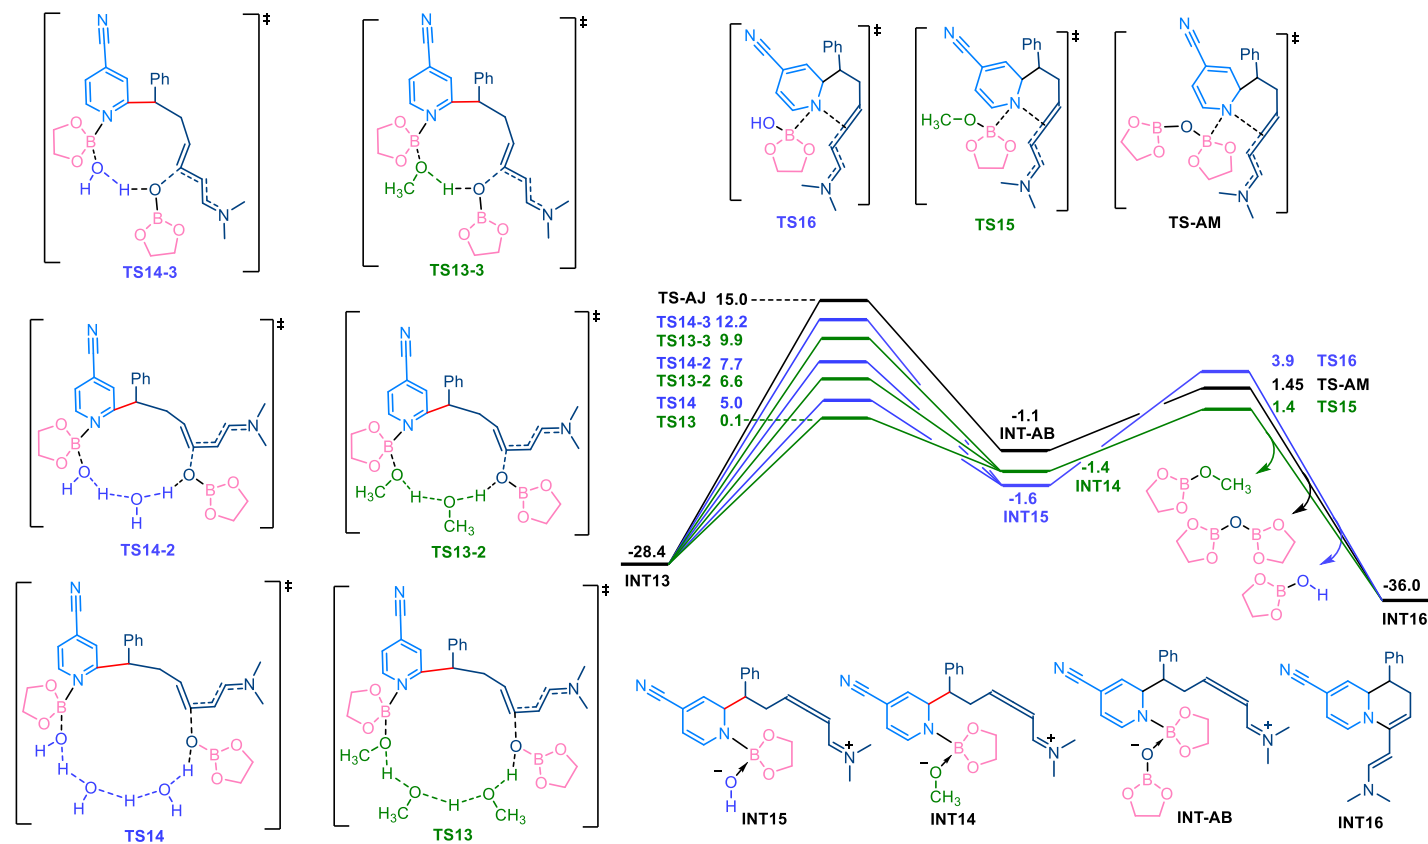

Figure S9 Other H-shuttle assisted removal of the O[B] moiety pathways

The water- and amine-assisted O[B] migration processes were calculated. In these steps, the migration can be facilitated by up to three assisting molecules, with the barrier decreasing as the number of bridging molecules increased. The barrier for alcohol bridges were lower than that of water bridges.

## 2.5 Other 1,4-H shift pathways facilitated by “water bridge” or “alcohol bridge”

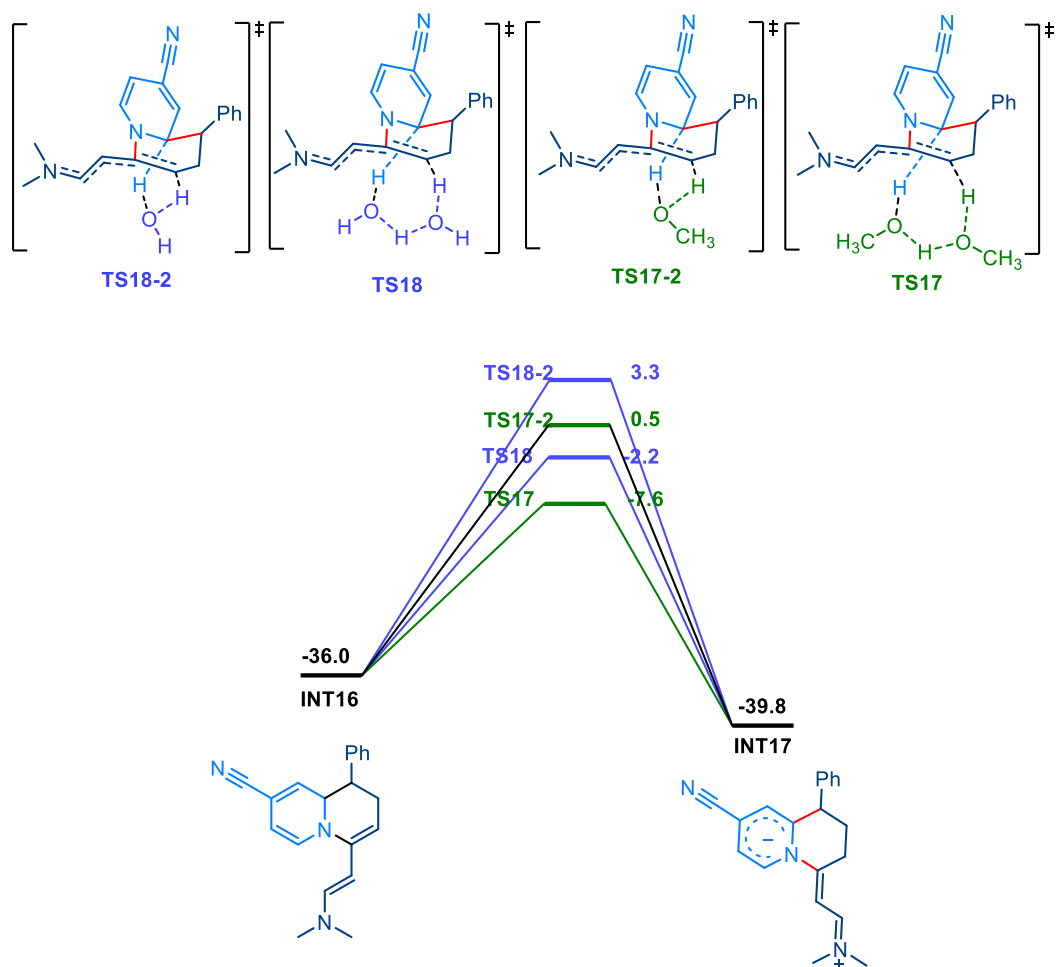

Figure S10 Other 1,4-H shift pathways

## 2.6 Other elimination pathways of amines facilitated by “water bridge” and “alcohol bridge”

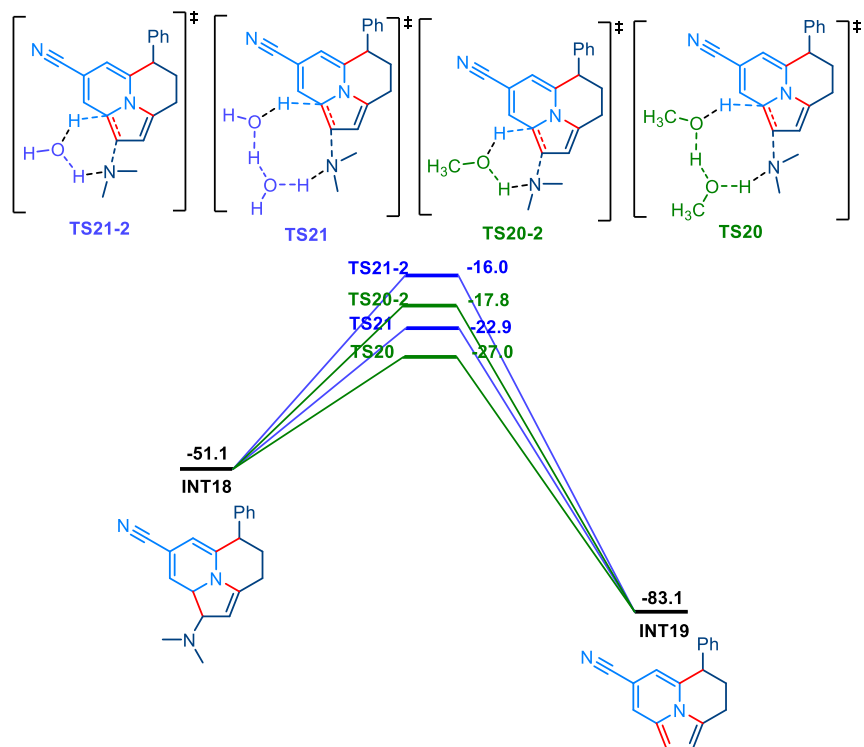

Figure S11 Other elimination pathways of amines

## 2.7 Spin density analysis

Table S3 Spin density analysis

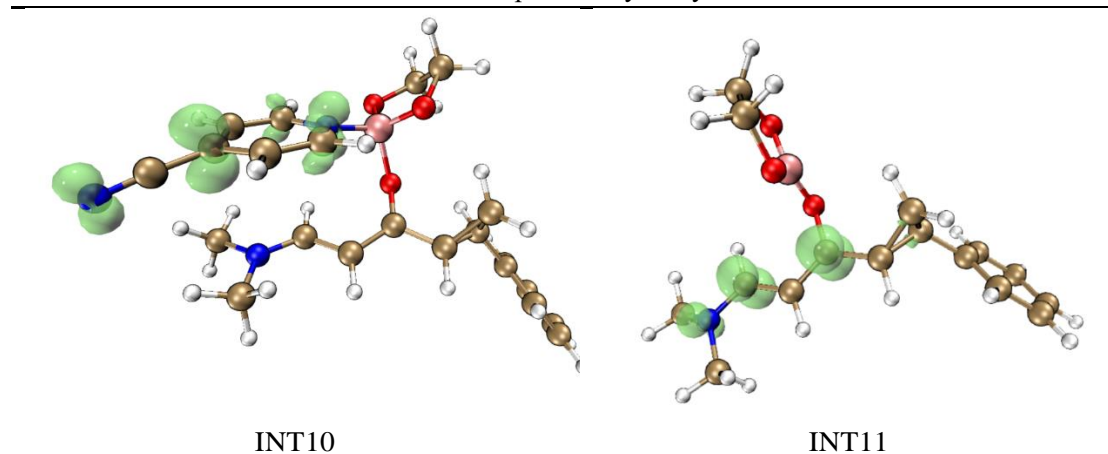

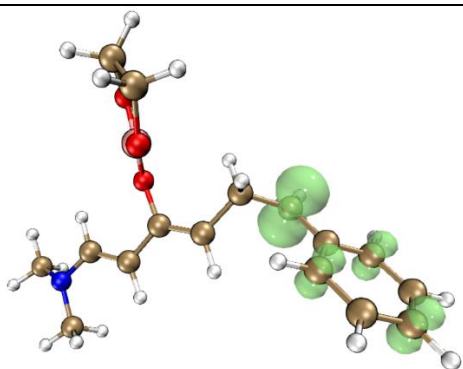

INT12

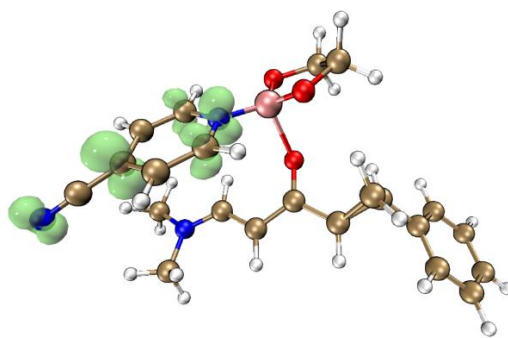

TS10

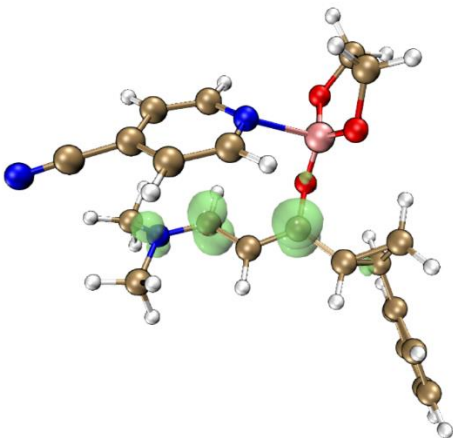

TS11

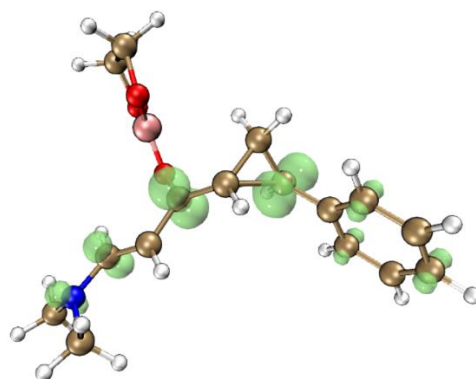

TS12

---

## 2.8 Structures of important intermediates and transition states

Table S4 Structures of important intermediates and transition states

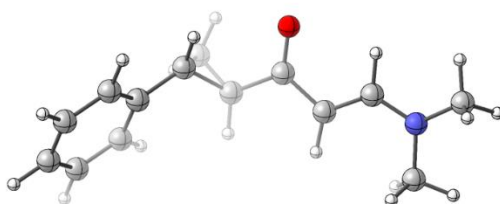

INT9

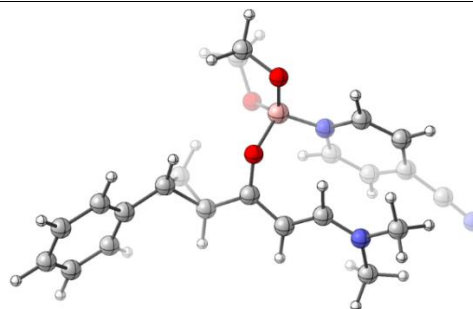

INT10

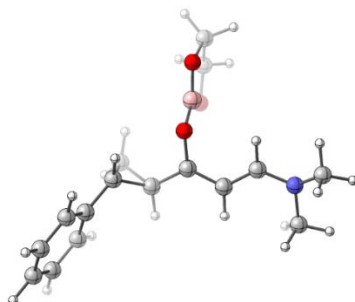

INT11

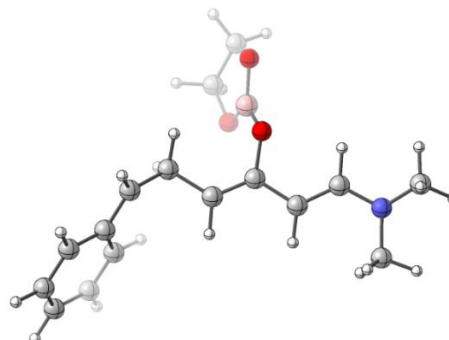

INT12

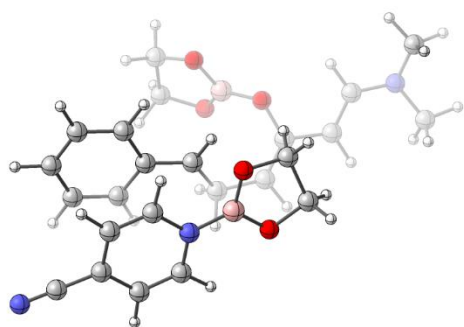

**INT12+a**

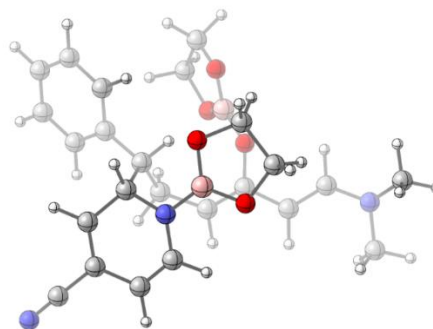

**INT13**

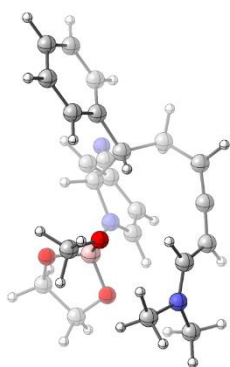

**INT14**

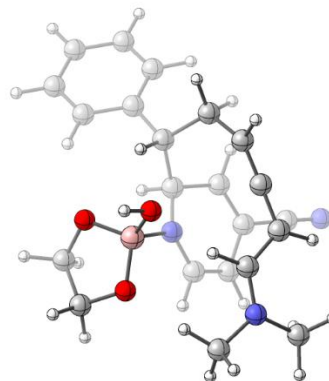

**INT15**

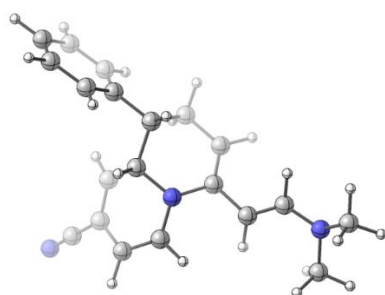

**INT16**

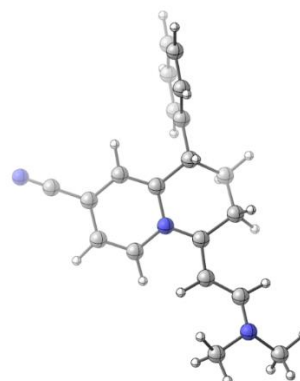

**INT17**

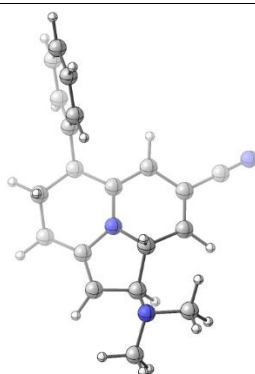

**INT18**

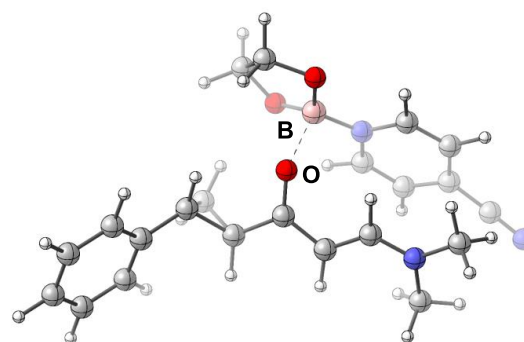

**TS10**  
**B-O:1.93221**

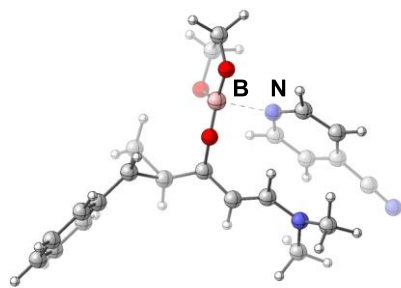

**TS11**  
B-N:2.12686

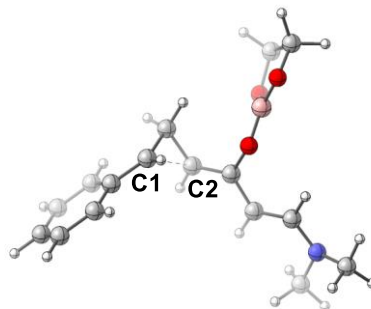

**TS12**  
C1-C2:1.94817

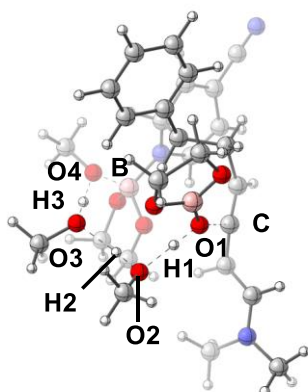

**TS13**  
C-O1:1.93054  
O1-H1:1.06020  
H1-O2:1.41009  
O2-H2:1.01533  
H2-O3:1.56102  
O3-H3:1.01072  
H3-O4:1.53324  
O4-B:1.48791

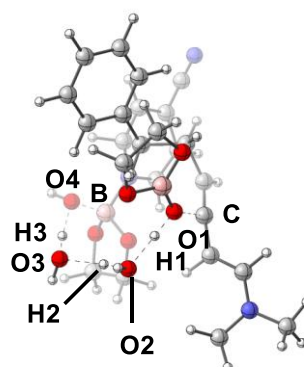

**TS14**  
C-O1:1.93557  
O1-H1:1.05550  
H1-O2:1.42548  
O2-H2:1.00971  
H2-O3:1.60233  
O3-H3:1.00193  
H3-O4:1.60786  
O4-B:1.48518

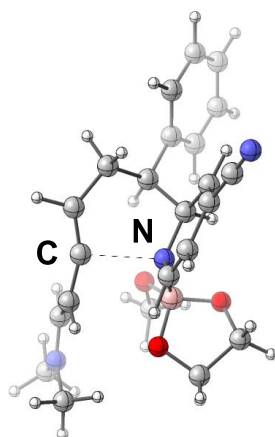

**TS15**  
C-N:2.36593

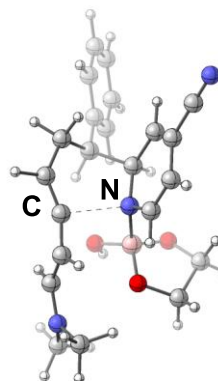

**TS16**  
C-N:2.38162

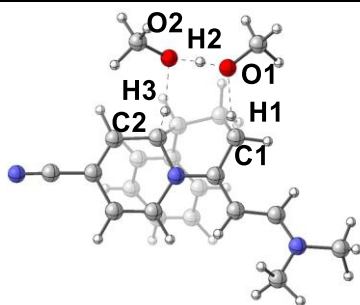

TS17  
C1-H1:1.12899  
H1-O1:1.79441  
O1-H2:1.10676  
H2-O2:1.30624  
O2-H3:1.76336  
H3-C2:1.12084

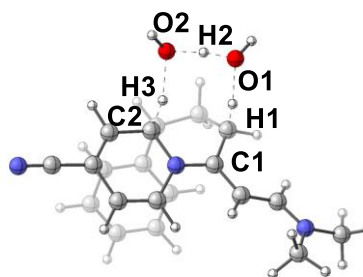

TS18  
C1-H1:1.15067  
H1-O1:1.68603  
O1-H2:1.12292  
H2-O2:1.30507  
O2-H3:1.66461  
H3-C2:1.14319

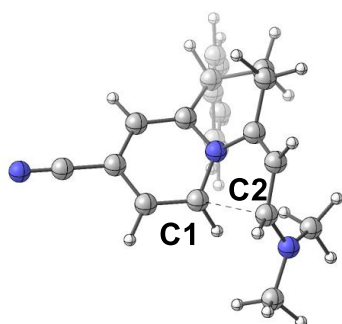

TS19  
C1-C2:2.38498

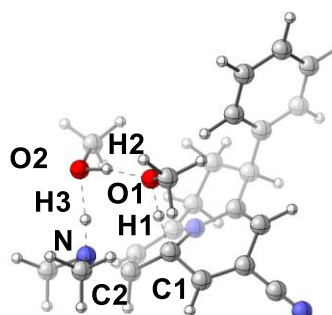

TS20  
C1-H1:1.36536  
H1-O1:1.24278  
O1-H2:1.43279  
H2-O2:1.04115  
O2-H3:1.53568  
H3-H:1.08699  
N-C2:1.55131

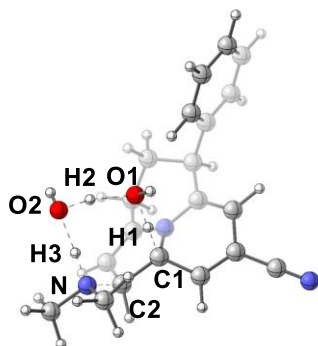

TS21  
C1-H1:1.37527  
H1-O1:1.24644  
O1-H2:1.41819  
H2-O2:1.05590  
O2-H3:1.50669  
H3-H:1.09528  
N-C2:1.54477

---

### 3 Control experiments

Experimental procedure: To a 20 mL sealed tube with magnetic stirrer bar, enaminone (0.1 mmol), B<sub>2</sub>pin<sub>2</sub> (3.0 equiv), THF (1.0 mL), pyridine derivative (1.5 equiv) and MeOH (1.0 equiv) were successively added and vigorously stirred together in 110 °C oil bath under N<sub>2</sub> atmosphere. After the reaction was finished, the mixture was cooled to room temperature. The reaction was quenched with saturated NH<sub>4</sub>Cl aq. and extracted with EtOAc (3 × 15 mL). The combined ethyl acetate layer was washed with brine (10 mL) and dried over anhydrous Na<sub>2</sub>SO<sub>4</sub>. The solvent was removed under vacuum. The crude product was purified by flash column chromatography (eluting with petroleum ether/ethyl acetate) on silica gel to afford **3** and **4**.

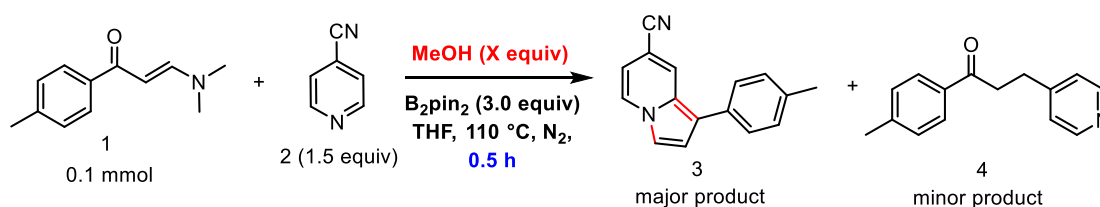

| entry | MeOH (equiv) | major product yield (%) | minor product yield (%) |
|-------|--------------|-------------------------|-------------------------|
| 1     | 0            | 30.0                    | trace                   |
| 2     | 1            | 46.3                    | 20.9                    |

If the alcohol-mediated amine elimination process was the rate-determining step, the reaction rate should increase as the concentration of alcohols increased. In the same time scale, adding additional alcohols should produce more products. However, when we performed the reactions containing additional MeOH at 110 °C for 24 hours. An inseparable mixture was obtained. Therefore, the reaction time was shortened herein.

As shown above, when 1.0 equiv of alcohols were added to the reaction system, the yield of the desired product **3** increased correspondingly, indicating the alcohols were involved in the rate-determining step. Furthermore, it was found that the added alcohols could induce and accelerate other side reactions, which also eliminated amino motifs and led to the minor product **4**.

### 4. NMR Spectra of 4

3-(pyridin-4-yl)-1-(p-tolyl)propan-1-one (**4**)

The compound was obtained as yellow oil. (PE/EtOAc =10:1) 4.7mg, 20.9% yield.

<sup>1</sup>H NMR (400 MHz, CDCl<sub>3</sub>) δ 8.51 (s, 2H), 7.85 (d, *J* = 8.4 Hz, 2H), 7.26 (d, *J* = 8.4 Hz, 2H), 7.20 (d, *J* = 4.8 Hz, 2H), 3.30 (t, *J* = 7.2 Hz, 2H), 3.07 (t, *J* = 7.6 Hz, 2H), 2.41 (s, 2H).

<sup>13</sup>C NMR (101 MHz, CDCl<sub>3</sub>) δ 197.9, 150.6, 149.6, 144.2, 134.1, 129.4, 128.1, 124.1, 38.7, 29.6, 21.7.



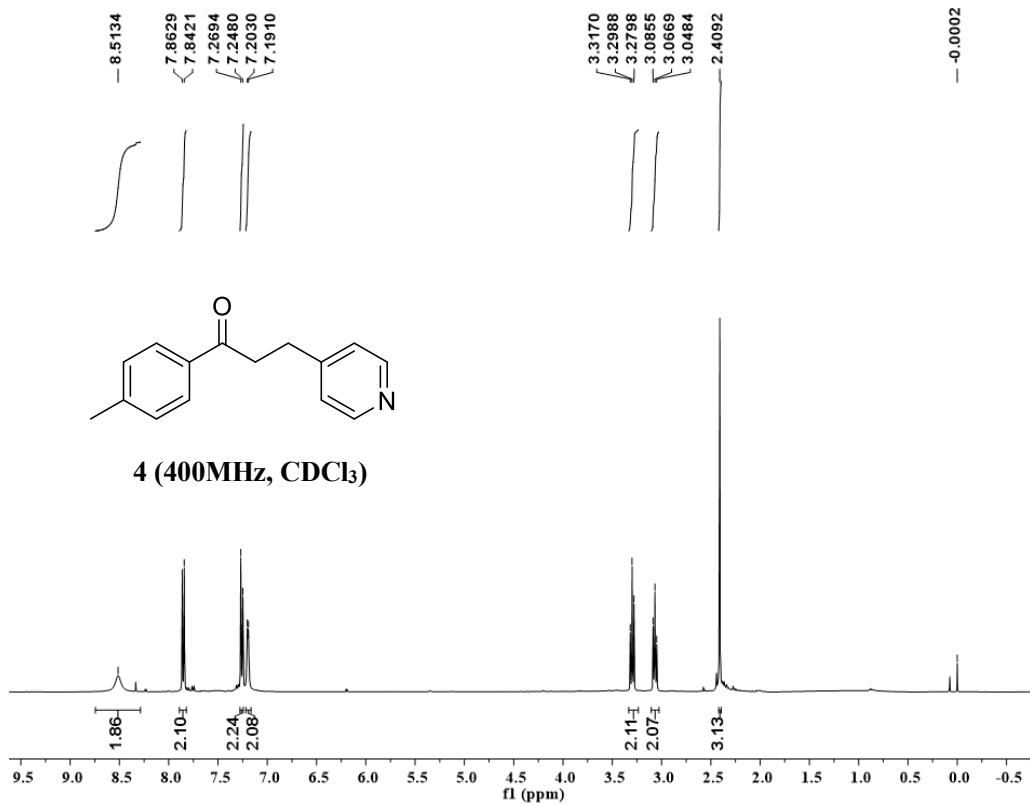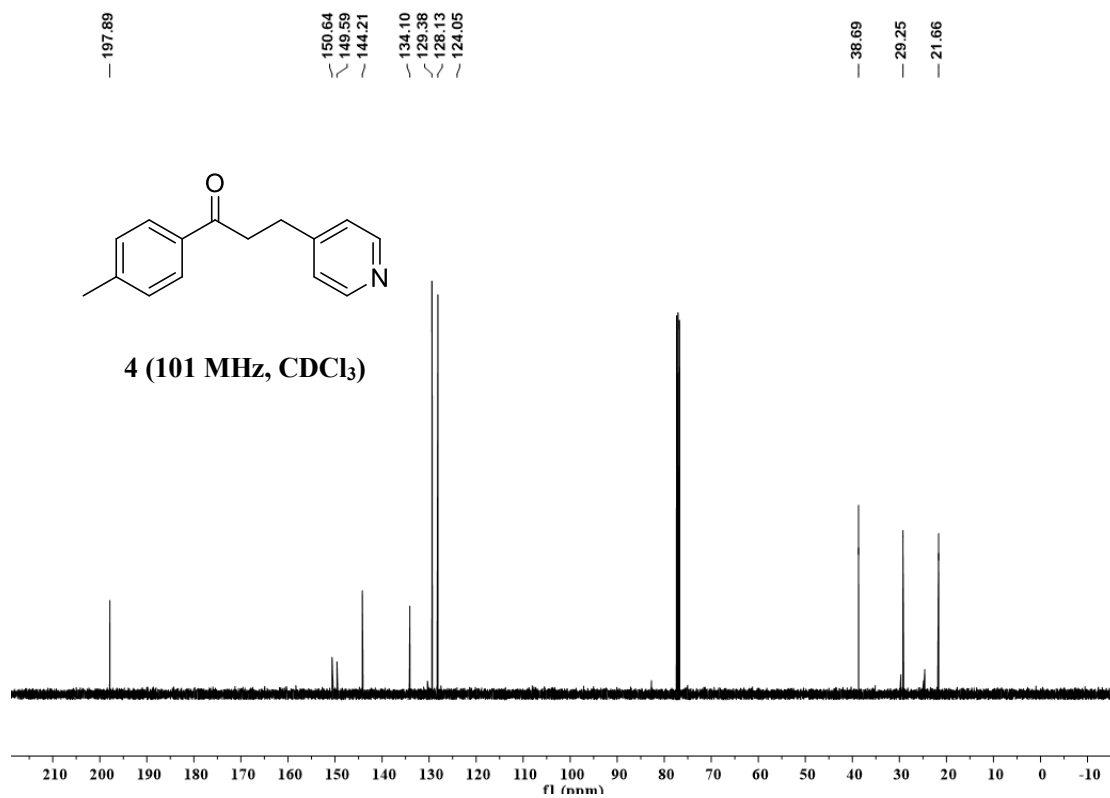

## 5. The calculated energies and imaginary frequencies.

Table S5 The computed data

| Entry                           | $E_c^a$  | $E_c^b$      | $H^c$        | $G^d$        | Imaginary frequency |
|---------------------------------|----------|--------------|--------------|--------------|---------------------|
| a                               | 0.122217 | -594.156113  | -594.144144  | -594.194808  | /                   |
| b                               | 0.058175 | -340.300485  | -340.293573  | -340.330719  | /                   |
| B <sub>2</sub> Pin <sub>2</sub> | 0.104698 | -507.666629  | -507.656212  | -507.704549  | /                   |
| c                               | 0.110573 | -582.975773  | -582.964783  | -583.013852  | /                   |
| d                               | 0.051623 | -134.356150  | -134.350520  | -134.382871  | /                   |
| e                               | 0.068000 | -134.999184  | -134.993853  | -135.024644  | /                   |
| f                               | 0.057681 | -329.671015  | -329.664702  | -329.699963  | /                   |
| g                               | 0.003416 | -76.362206   | -76.358426   | -76.380504   | /                   |
| h                               | 0.122249 | -388.302268  | -388.292676  | -388.335582  | /                   |
| i                               | 0.044383 | -328.990260  | -328.984150  | -329.019702  | /                   |
| INT-A                           | 0.326584 | -1150.648225 | -1150.623224 | -1150.703645 | /                   |
| INT3-iso2                       | 0.396340 | -1404.563420 | -1404.533936 | -1404.625649 | /                   |
| INT-C                           | 0.395518 | -1404.565682 | -1404.536030 | -1404.627233 | /                   |
| INT-D                           | 0.196356 | -762.927647  | -762.912390  | -762.969571  | /                   |
| INT-E                           | 0.197055 | -762.973472  | -762.958021  | -763.015691  | /                   |
| INT-F                           | 0.197086 | -762.974363  | -762.959023  | -763.016410  | /                   |
| INT-G                           | 0.195441 | -762.869353  | -762.854154  | -762.911312  | /                   |
| INT-H                           | 0.195187 | -762.943791  | -762.928385  | -762.986316  | /                   |
| INT-I                           | 0.195215 | -762.944440  | -762.928991  | -762.986835  | /                   |
| INT-J                           | 0.194211 | -762.861263  | -762.845460  | -762.903955  | /                   |
| INT-K                           | 0.193976 | -762.879101  | -762.863128  | -762.921177  | /                   |
| INT-L                           | 0.196790 | -762.940438  | -762.925034  | -762.982198  | /                   |
| INT-M                           | 0.193596 | -762.924311  | -762.908014  | -762.967299  | /                   |
| INT-N                           | 0.330412 | -1150.676659 | -1150.652376 | -1150.731084 | /                   |
| INT-O                           | 0.327666 | -1150.639960 | -1150.615553 | -1150.695839 | /                   |
| INT-P                           | 0.249495 | -1016.253634 | -1016.233680 | -1016.303768 | /                   |
| INT-Q                           | 0.194982 | -762.944427  | -762.929066  | -762.987034  | /                   |

---

|            |          |              |              |              |          |
|------------|----------|--------------|--------------|--------------|----------|
| INT-R      | 0.245571 | -821.015595  | -820.996392  | -821.064112  | /        |
| INT-S      | 0.248761 | -821.004225  | -820.986275  | -821.050449  | /        |
| INT-T      | 0.320803 | -1074.904195 | -1074.882283 | -1074.953916 | /        |
| INT-U      | 0.315623 | -1074.892105 | -1074.868555 | -1074.944550 | /        |
| INT-V      | 0.318925 | -1074.850289 | -1074.828083 | -1074.900144 | /        |
| INT-W      | 0.258948 | -821.600528  | -821.581131  | -821.648071  | /        |
| INT-X      | 0.397006 | -1404.575981 | -1404.546324 | -1404.636399 | /        |
| INT-Y      | 0.260642 | -821.555046  | -821.536497  | -821.601630  | /        |
| enaminone  | 0.178590 | -556.504515  | -556.490765  | -556.545357  | /        |
| INT1       | 0.325881 | -1150.686708 | -1150.661567 | -1150.742745 | /        |
| INT2       | 0.242848 | -810.362622  | -810.344097  | -810.411106  | /        |
| INT3       | 0.397288 | -1404.571258 | -1404.541699 | -1404.632091 | /        |
| INT4       | 0.394882 | -1404.572422 | -1404.542663 | -1404.634411 | /        |
| INT5       | 0.398195 | -1404.583314 | -1404.554645 | -1404.643640 | /        |
| INT6       | 0.261190 | -821.594852  | -821.576568  | -821.641048  | /        |
| INT7       | 0.348800 | -956.574839  | -956.551030  | -956.627095  | /        |
| product(P) | 0.171730 | -686.624167  | -686.610698  | -686.663898  | /        |
| j          | 0.029406 | -115.611223  | -115.606996  | -115.633926  | /        |
| TS-A       | 0.326147 | -1150.647118 | -1150.622810 | -1150.702299 | -112.32  |
| TS-B       | 0.321972 | -1150.583717 | -1150.558398 | -1150.641076 | -155.88  |
| TS-C       | 0.325795 | -1150.594164 | -1150.569732 | -1150.648876 | -2249.70 |
| TS-D       | 0.325384 | -1150.642374 | -1150.617469 | -1150.697854 | -476.20  |
| TS-E       | 0.326740 | -1150.649486 | -1150.624865 | -1150.704285 | -384.02  |
| TS-F       | 0.389040 | -1404.489870 | -1404.459796 | -1404.552004 | -1825.69 |
| TS-G       | 0.257479 | -821.521722  | -821.503743  | -821.566652  | -1522.05 |
| TS-H       | 0.284837 | -897.917760  | -897.898664  | -897.963898  | -860.69  |
| TS-I       | 0.213599 | -839.265079  | -839.248130  | -839.308995  | -1573.69 |
| TS-J       | 0.213546 | -839.275373  | -839.258372  | -839.318898  | -1560.03 |
| TS-K       | 0.286052 | -897.875455  | -897.856262  | -897.921992  | -415.66  |
| TS-L       | 0.285231 | -897.895240  | -897.875768  | -897.941194  | -472.90  |

---

---

|                       |          |              |              |              |          |
|-----------------------|----------|--------------|--------------|--------------|----------|
| TS-M                  | 0.285548 | -897.897955  | -897.878573  | -897.944120  | -441.59  |
| TS-N                  | 0.190100 | -762.842025  | -762.826613  | -762.884590  | -1326.30 |
| TS-O                  | 0.193563 | -762.867103  | -762.851652  | -762.908937  | -235.93  |
| TS-P                  | 0.189365 | -762.835243  | -762.819694  | -762.878098  | -1496.83 |
| TS-Q                  | 0.194836 | -762.895772  | -762.880578  | -762.937266  | -474.88  |
| TS-R                  | 0.392062 | -1404.512820 | -1404.483202 | -1404.573248 | -177.17  |
| TS-S                  | 0.329239 | -1150.612701 | -1150.589070 | -1150.666040 | -941.90  |
| TS-T                  | 0.328636 | -1150.597294 | -1150.573200 | -1150.651512 | -161.53  |
| TS-U                  | 0.324751 | -1150.602403 | -1150.577913 | -1150.658049 | -669.59  |
| TS-V                  | 0.272858 | -1092.601148 | -1092.580279 | -1092.650394 | -1278.06 |
| TS-W                  | 0.188532 | -762.868866  | -762.853485  | -762.910962  | -1879.71 |
| TS-X                  | 0.246869 | -820.975657  | -820.957556  | -821.021663  | -518.43  |
| TS-Y                  | 0.245691 | -820.976446  | -820.958306  | -821.022559  | -570.70  |
| TS-Z                  | 0.317285 | -1074.888097 | -1074.865346 | -1074.938792 | -54.17   |
| TS-AA                 | 0.318068 | -1074.838887 | -1074.817092 | -1074.888287 | -501.36  |
| TS-AB                 | 0.316244 | -1074.842835 | -1074.820382 | -1074.893105 | -549.59  |
| TS-AC                 | 0.397595 | -1404.575555 | -1404.546362 | -1404.634991 | -117.16  |
| TS-AD                 | 0.258776 | -821.539910  | -821.521252  | -821.586172  | -385.98  |
| TS-AE                 | 0.256930 | -821.517748  | -821.499644  | -821.562944  | -1556.02 |
| TS1                   | 0.326099 | -1150.680307 | -1150.655292 | -1150.735861 | -162.54  |
| TS2                   | 0.324783 | -1150.683333 | -1150.658315 | -1150.739314 | -133.87  |
| TS4                   | 0.396641 | -1404.547534 | -1404.518410 | -1404.607265 | -256.27  |
| TS4-iso               | 0.397159 | -1404.543854 | -1404.514790 | -1404.603165 | -242.50  |
| TS5                   | 0.397379 | -1404.572467 | -1404.543598 | -1404.631860 | -16.06   |
| TS5-iso               | 0.398772 | -1404.559908 | -1404.531363 | -1404.618379 | -67.54   |
| TS5-iso2              | 0.397072 | -1404.553935 | -1404.524886 | -1404.613899 | -263.43  |
| TS6                   | 0.399614 | -1404.579526 | -1404.551223 | -1404.638011 | -150.15  |
| TS6-iso               | 0.394830 | -1404.583573 | -1404.554539 | -1404.645696 | -154.59  |
| TS7-2H <sub>2</sub> O | 0.298943 | -974.302721  | -974.280628  | -974.352725  | -1394.65 |
| TS7-H <sub>2</sub> O  | 0.278258 | -897.921910  | -897.901985  | -897.969296  | -1521.56 |

---

|          |          |              |              |              |          |
|----------|----------|--------------|--------------|--------------|----------|
| TS7      | 0.354943 | -1052.806739 | -1052.781574 | -1052.860493 | -878.76  |
| TS7-MeOH | 0.304577 | -937.176261  | -937.154650  | -937.225974  | -1532.63 |
| TS8      | 0.345963 | -956.572996  | -956.549502  | -956.625178  | -871.71  |
| TS9      | 0.348004 | -956.576620  | -956.553442  | -956.627871  | -205.03  |
| INT-Z    | 0.457605 | -1521.167366 | -1521.135259 | -1521.231774 | /        |
| INT-AA   | 0.465436 | -1521.183920 | -1521.153818 | -1521.242972 | /        |
| INT-AB   | 0.457531 | -1521.145925 | -1521.113625 | -1521.209075 | /        |
| INT-AC   | 0.231597 | -803.193952  | -803.177838  | -803.237808  | /        |
| INT-AD   | 0.382334 | -1267.242167 | -1267.213721 | -1267.305467 | /        |
| INT9     | 0.237147 | -673.102944  | -673.086273  | -673.148502  | /        |
| INT10    | 0.386708 | -1267.285388 | -1267.257582 | -1267.344744 | /        |
| INT11    | 0.300232 | -926.949367  | -926.927714  | -927.003448  | /        |
| INT12    | 0.300311 | -926.946882  | -926.925096  | -927.000424  | /        |
| INT12+a  | 0.450783 | -1521.135705 | -1521.101960 | -1521.201930 | /        |
| INT13    | 0.459365 | -1521.188918 | -1521.156463 | -1521.252732 | /        |
| INT14    | 0.426532 | -1307.083924 | -1307.054172 | -1307.143636 | /        |
| INT15    | 0.398912 | -1267.832197 | -1267.803743 | -1267.890576 | /        |
| INT16    | 0.320054 | -938.200319  | -938.178681  | -938.251060  | /        |
| INT17    | 0.322088 | -938.207805  | -938.187001  | -938.256990  | /        |
| INT18    | 0.324257 | -938.226408  | -938.205953  | -938.275041  | /        |
| INT19    | 0.233190 | -803.258133  | -803.242259  | -803.301326  | /        |
| TS10     | 0.386399 | -1267.284185 | -1267.256479 | -1267.343176 | -206.00  |
| TS11     | 0.383503 | -1267.270354 | -1267.242486 | -1267.330417 | -145.73  |
| TS12     | 0.300093 | -926.932296  | -926.910912  | -926.985238  | -575.37  |
| TS13     | 0.602434 | -1868.030561 | -1867.986769 | -1868.109008 | -323.08  |
| TS13-2   | 0.555944 | -1752.393841 | -1752.354817 | -1752.464667 | -373.27  |
| TS13-3   | 0.501999 | -1636.756027 | -1636.720046 | -1636.825538 | -341.82  |
| TS14     | 0.526325 | -1750.271260 | -1750.232619 | -1750.340874 | -307.12  |
| TS14-2   | 0.504155 | -1673.889787 | -1673.854100 | -1673.956057 | -365.24  |
| TS14-3   | 0.476360 | -1597.501143 | -1597.466839 | -1597.568498 | -341.27  |

---

|        |          |              |              |              |          |
|--------|----------|--------------|--------------|--------------|----------|
| TS15   | 0.425793 | -1307.078504 | -1307.049311 | -1307.137839 | -232.56  |
| TS16   | 0.400423 | -1267.825077 | -1267.797558 | -1267.881793 | -229.49  |
| TS17   | 0.414056 | -1169.412159 | -1169.383049 | -1169.473559 | -72.85   |
| TS17-2 | 0.362624 | -1053.770589 | -1053.745222 | -1053.826713 | -740.28  |
| TS18   | 0.360407 | -1090.901468 | -1090.875643 | -1090.958134 | -278.52  |
| TS18-2 | 0.335439 | -1014.515735 | -1014.492152 | -1014.568751 | -1592.92 |
| TS19   | 0.321037 | -938.168080  | -938.147449  | -938.217150  | -377.29  |
| TS20   | 0.416289 | -1169.445437 | -1169.417109 | -1169.504347 | -1200.04 |
| TS20-2 | 0.367824 | -1053.802463 | -1053.778243 | -1053.855781 | -1297.89 |
| TS21   | 0.364262 | -1090.937408 | -1090.912593 | -1090.990975 | -1219.36 |
| TS21-2 | 0.342169 | -1014.549190 | -1014.526871 | -1014.599513 | -1381.57 |
| TS-AF  | 0.462321 | -1521.107006 | -1521.077281 | -1521.165425 | -592.93  |
| TS-AG  | 0.457397 | -1521.091934 | -1521.060732 | -1521.153789 | -597.91  |
| TS-AH  | 0.381902 | -1267.227188 | -1267.198867 | -1267.288916 | -514.47  |
| TS-AI  | 0.47218  | -1597.462178 | -1597.427576 | -1597.530112 | -669.11  |
| TS-AJ  | 0.454610 | -1521.119205 | -1521.086903 | -1521.183487 | -297.67  |
| TS-AK  | 0.321436 | -938.051416  | -938.030814  | -938.100261  | -269.37  |
| TS-AL  | 0.317778 | -938.153369  | -938.132784  | -938.202030  | -1607.13 |
| TS-AM  | 0.456088 | -1521.141727 | -1521.109741 | -1521.205088 | -245.88  |
| TS-AN  | 0.343658 | -1014.451892 | -1014.428646 | -1014.503264 | -203.50  |
| TS-AO  | 0.246853 | -879.520032  | -879.502298  | -879.565391  | -2181.95 |
| TS-AP  | 0.271051 | -955.906851  | -955.887073  | -955.954141  | -1492.10 |
| TS-AQ  | 0.410250 | -1073.190693 | -1073.165184 | -1073.245111 | -330.77  |
| TS-AR  | 0.384371 | -1267.203222 | -1267.175653 | -1267.262964 | -707.48  |
| INT-AF | 0.454273 | -1521.169832 | -1521.136935 | -1521.235686 | /        |
| INT-AG | 0.455079 | -1521.183802 | -1521.150847 | -1521.250565 | /        |
| INT-AH | 0.396900 | -1404.563288 | -1404.533589 | -1404.623819 | /        |
| INT-AI | 0.394294 | -1404.553373 | -1404.523663 | -1404.615374 | /        |
| INT-AJ | 0.395197 | -1404.556772 | -1404.527265 | -1404.618129 | /        |
| INT-AE | 0.394502 | -1404.560946 | -1404.531157 | -1404.624424 | /        |

---

---

|           |          |              |              |              |         |
|-----------|----------|--------------|--------------|--------------|---------|
| TS-INT-Z  | 0.451995 | -1521.130569 | -1521.097763 | -1521.195965 | -509.22 |
| TS-INT-AA | 0.457408 | -1521.133453 | -1521.102219 | -1521.195160 | -517.75 |
| TS-INT-AA | 0.457408 | -1521.133453 | -1521.102219 | -1521.195160 | -517.75 |
| TS-INT-AG | 0.449745 | -1521.123875 | -1521.090407 | -1521.190789 | -187.08 |
| TS-INT-AF | 0.451611 | -1521.131349 | -1521.098321 | -1521.196611 | -470.26 |
| TS-INT-AJ | 0.392603 | -1404.526722 | -1404.496804 | -1404.588042 | -318.23 |
| TS3-iso2  | 0.396102 | -1404.530240 | -1404.500758 | -1404.589934 | -121.52 |
| TS-INT-AI | 0.395762 | -1404.531966 | -1404.502680 | -1404.591887 | -191.73 |
| TS-INT-AK | 0.393309 | -1404.534857 | -1404.504932 | -1404.596270 | -379.28 |
| TS3-iso   | 0.392667 | -1404.535875 | -1404.505730 | -1404.598058 | -336.61 |
| TS3       | 0.395915 | -1404.539966 | -1404.510365 | -1404.599288 | -405.25 |
| TS-INT13  | 0.452350 | -1521.132427 | -1521.099474 | -1521.196986 | -508.74 |
| INT5-iso  | 0.396689 | -1404.584829 | -1404.555641 | -1404.646189 | /       |
| INT6-iso  | 0.261904 | -821.596270  | -821.578075  | -821.641931  | /       |

---

<sup>a</sup> Thermal correction to Gibbs Free Energy

<sup>b</sup> Sum of electronic and zero-point Energies

<sup>c</sup> Sum of electronic and thermal Enthalpies

<sup>d</sup> Sum of electronic and thermal Free Energies

## 6. Cartesian coordinates

**a**

|   |             |             |             |
|---|-------------|-------------|-------------|
| C | 3.74353900  | -0.76489300 | -0.10529900 |
| C | 3.74342700  | 0.76504300  | 0.10597100  |
| B | 1.63867500  | -0.00001600 | -0.00011100 |
| O | 2.37607800  | -1.15080400 | 0.05697100  |
| O | 2.37600100  | 1.15082600  | -0.05689500 |
| C | -0.51495300 | -1.20030200 | 0.01363300  |
| C | -1.87015000 | -1.21803900 | 0.01418300  |
| C | -2.61334900 | -0.00006000 | -0.00009100 |
| C | -1.87016100 | 1.21790200  | -0.01465900 |
| C | -0.51495200 | 1.20017800  | -0.01441700 |
| N | 0.20166700  | -0.00005400 | -0.00040300 |
| H | 0.09153800  | -2.09654700 | 0.02324900  |
| H | -2.38779100 | -2.16971200 | 0.02520500  |
| H | -2.38779300 | 2.16958100  | -0.02572200 |
| H | 0.09152100  | 2.09643500  | -0.02424800 |
| C | -4.02804600 | -0.00008600 | 0.00031400  |
| N | -5.19149700 | 0.00024000  | 0.00067400  |
| H | 4.07051700  | -1.04059900 | -1.11281900 |
| H | 4.35946600  | 1.29445500  | -0.62361700 |
| H | 4.06992200  | 1.04079100  | 1.11363500  |
| H | 4.35929800  | -1.29426200 | 0.62456300  |

**b**

|   |             |             |             |
|---|-------------|-------------|-------------|
| C | -1.50272200 | 1.14059700  | 0.00002900  |
| C | -0.11287900 | 1.20327700  | 0.00003100  |
| C | 0.59344700  | 0.00006700  | 0.00012300  |
| C | -0.11285100 | -1.20332900 | 0.00005300  |
| C | -1.50250800 | -1.14077400 | 0.00000900  |
| N | -2.19421200 | -0.00004200 | -0.00008900 |
| H | -2.08807000 | 2.05630700  | 0.00008700  |
| H | 0.40703800  | 2.15401200  | -0.00017400 |
| H | 0.40720900  | -2.15398000 | 0.00022500  |
| H | -2.08789200 | -2.05646100 | -0.00033800 |
| C | 2.03469700  | 0.00070000  | -0.00001500 |
| N | 3.19115500  | -0.00040200 | -0.00007900 |

**b<sub>2pin2</sub>**

|   |             |             |             |
|---|-------------|-------------|-------------|
| C | -2.98557500 | 0.44921000  | 0.62702100  |
| C | -2.98557200 | -0.44924700 | -0.62702400 |
| B | -0.85146300 | 0.00002200  | -0.00000200 |
| O | -1.61004700 | 0.76950400  | 0.84331200  |
| O | -1.61001900 | -0.76947900 | -0.84334700 |
| C | 2.98569900  | 0.62677600  | -0.44967500 |
| C | 2.98566700  | -0.62682400 | 0.44966200  |
| B | 0.85141300  | 0.00003800  | 0.00003300  |
| O | 1.60990100  | 0.84525900  | -0.76738500 |
| O | 1.60987700  | -0.84521500 | 0.76742000  |
| H | -3.55389700 | 1.37205700  | 0.48761300  |
| H | -3.37088800 | 0.06890000  | -1.51091400 |
| H | -3.55383300 | -1.37212200 | -0.48757700 |
| H | -3.37085500 | -0.06896900 | 1.51091200  |
| H | 3.37354800  | -1.51047500 | -0.06690600 |
| H | 3.55176800  | -0.48578600 | 1.37364200  |
| H | 3.55174100  | 0.48563200  | -1.37367400 |
| H | 3.37365800  | 1.51042200  | 0.06683300  |

**c**

|   |             |             |             |
|---|-------------|-------------|-------------|
| C | 3.42412900  | -0.14183300 | -0.32967000 |
| C | 2.85520400  | 1.05322100  | 0.47153300  |
| B | 1.21929600  | -0.42744400 | 0.01840800  |
| O | 2.35113000  | -1.07465500 | -0.40172200 |
| O | 1.44684400  | 0.84410900  | 0.48043200  |
| C | -3.42442500 | -0.14146400 | 0.32854400  |
| C | -2.85472600 | 1.05325000  | -0.47244400 |
| B | -1.21937400 | -0.42734300 | -0.01745600 |
| O | -2.35183700 | -1.07478400 | 0.40068900  |
| O | -1.44624400 | 0.84463600  | -0.47874700 |
| H | 3.71442000  | 0.14629100  | -1.34542900 |
| H | 3.07955600  | 2.01719600  | 0.00849200  |
| H | 3.22039400  | 1.06714400  | 1.50381600  |
| H | 4.28293300  | -0.60733700 | 0.15983700  |
| H | -3.21812700 | 1.06615700  | -1.50537800 |
| H | -3.08027000 | 2.01747600  | -0.01053100 |
| H | -4.28339400 | -0.60650300 | -0.16110200 |
| H | -3.71467200 | 0.14679700  | 1.34428600  |
| O | -0.00008600 | -1.02834600 | 0.00103100  |

**d**



|   |             |             |             |
|---|-------------|-------------|-------------|
| N | 0.00000000  | -0.64390600 | -0.00000100 |
| C | -1.18535500 | 0.17331800  | 0.00000400  |
| H | -2.08032100 | -0.45126900 | 0.00016800  |
| H | -1.21270500 | 0.83265400  | 0.88221400  |
| H | -1.21285200 | 0.83238100  | -0.88240900 |
| C | 1.18535300  | 0.17331800  | -0.00000600 |
| H | 1.21293000  | 0.83226100  | 0.88249300  |
| H | 2.08032100  | -0.45126900 | -0.00031300 |
| H | 1.21263500  | 0.83276800  | -0.88213100 |

**e**

|   |             |             |             |
|---|-------------|-------------|-------------|
| H | -0.00002700 | 1.32718100  | 0.52664700  |
| N | -0.00000900 | 0.57125000  | -0.15067200 |
| C | -1.20340700 | -0.22388800 | 0.02051800  |
| H | -1.26064900 | -0.96499700 | -0.78362600 |
| H | -1.24829800 | -0.77082700 | 0.97864900  |
| H | -2.08583700 | 0.41615600  | -0.05411100 |
| C | 1.20342500  | -0.22389100 | 0.02052000  |
| H | 1.26109100  | -0.96440000 | -0.78412000 |
| H | 2.08581800  | 0.41629100  | -0.05320200 |
| H | 1.24786100  | -0.77147900 | 0.97824100  |

**f**

|   |             |             |             |
|---|-------------|-------------|-------------|
| C | 1.32004900  | 0.80181700  | -0.09489100 |
| C | 1.37460500  | -0.72927000 | 0.09722800  |
| B | -0.76453400 | -0.04776400 | -0.00151400 |
| O | -0.05448300 | 1.13187600  | 0.08320100  |
| O | 0.03119900  | -1.16176800 | -0.08648800 |
| H | 1.92813100  | 1.34348000  | 0.63358700  |
| H | 1.70475700  | -1.00102200 | 1.10614500  |
| H | 2.02494300  | -1.22382700 | -0.62828600 |
| H | 1.63214900  | 1.09790400  | -1.10258100 |
| O | -2.11696400 | -0.11663500 | -0.00195700 |
| H | -2.51325100 | 0.75922100  | 0.02663700  |

**g**

|   |             |             |            |
|---|-------------|-------------|------------|
| O | 0.00000000  | 0.11780800  | 0.00000000 |
| H | 0.76025700  | -0.47123300 | 0.00000000 |
| H | -0.76025700 | -0.47123000 | 0.00000000 |

**h**

|   |             |             |             |
|---|-------------|-------------|-------------|
| C | 2.15271200  | 0.75964500  | 0.12695400  |
| C | 2.15267600  | -0.75966000 | -0.12708400 |
| B | 0.03449900  | 0.00002800  | 0.00012500  |
| O | 0.80068200  | 1.15200200  | -0.07482800 |
| O | 0.80066000  | -1.15196100 | 0.07488400  |
| H | 2.44998300  | -0.99672100 | -1.15572800 |
| H | 2.80488700  | -1.30571100 | 0.55954700  |
| H | 2.80483900  | 1.30573600  | -0.55971600 |
| H | 2.45014400  | 0.99659600  | 1.15559500  |
| N | -1.36680700 | 0.00002100  | 0.00037900  |
| C | -2.13983200 | 1.22178100  | -0.02537700 |
| H | -1.46925500 | 2.08183100  | -0.03531000 |
| H | -2.77985500 | 1.26473100  | -0.91688200 |
| H | -2.79118900 | 1.29361200  | 0.85614700  |
| C | -2.13975100 | -1.22182300 | 0.02516500  |
| H | -1.46910200 | -2.08180200 | 0.03639800  |
| H | -2.78116100 | -1.26453600 | 0.91566000  |
| H | -2.78970700 | -1.29400900 | -0.85737900 |

**i**

|   |             |             |             |
|---|-------------|-------------|-------------|
| C | 1.29174000  | 0.76261900  | 0.10858500  |
| C | 1.29164200  | -0.76275300 | -0.10855900 |
| B | -0.80399800 | 0.00010100  | -0.00001500 |
| O | -0.07011800 | 1.15110700  | -0.09597800 |
| O | -0.07024400 | -1.15100900 | 0.09593100  |
| H | 1.58779100  | 1.03049700  | 1.12818500  |
| H | 1.93035800  | -1.29531400 | 0.59908500  |
| H | 1.58774000  | -1.03067300 | -1.12813900 |
| H | 1.93052100  | 1.29512900  | -0.59902600 |
| O | -2.17422700 | -0.00001500 | 0.00002300  |

**j**

|   |             |             |             |
|---|-------------|-------------|-------------|
| C | 0.65848700  | -0.01986200 | 0.00000200  |
| H | 1.08100800  | 0.98649100  | -0.00067000 |
| H | 1.02961300  | -0.54417600 | -0.89059800 |
| H | 1.02971500  | -0.54304200 | 0.89123000  |
| O | -0.74459600 | 0.12215300  | 0.00000200  |

H -1.13449000 -0.75732500 0.00001000

**enaminone**

C -0.14486800 -0.79981800 -0.11132300  
O -0.00945100 -2.01229000 -0.23889200  
C -1.53539000 -0.22480000 -0.04359300  
C -1.81734800 1.12921500 -0.23860800  
C -2.58671300 -1.11165900 0.20371600  
C -3.12951100 1.58998300 -0.17718400  
H -1.01897400 1.82807300 -0.46584300  
C -3.89499100 -0.65146500 0.27552300  
H -2.34536800 -2.16129200 0.33391400  
C -4.16883400 0.70239500 0.08643100  
H -3.34046700 2.64229500 -0.33920100  
H -4.70422700 -1.34662700 0.47589300  
H -5.19104800 1.06406500 0.13922300  
C 0.99340500 0.11075300 0.00179400  
H 0.83791000 1.16089100 0.20792200  
C 2.23646700 -0.42768200 -0.09846400  
H 2.29886800 -1.50307400 -0.25494400  
N 3.41631800 0.22534100 -0.04374100  
C 3.43281200 1.65010500 0.20788700  
H 3.10297600 1.88482800 1.22877200  
H 4.44603000 2.02980000 0.06704900  
H 2.76759500 2.15933300 -0.49615800  
C 4.66820500 -0.49521400 0.06800000  
H 4.50597300 -1.54150900 -0.19430700  
H 5.41091000 -0.07558900 -0.61767600  
H 5.07179400 -0.45113300 1.08760400

**INT1**

C -1.70442200 3.83338200 -0.46202800  
C -2.24272900 3.08966800 0.76910600  
B -1.01084200 1.64973200 -0.47856500  
O -0.76041400 2.94194600 -1.02526100  
O -2.13310900 1.72489300 0.41452100  
C 0.18544900 0.41149600 1.51396200  
C 1.28069500 -0.14112200 2.15527700  
C 2.55708000 0.24440800 1.73217700  
C 2.70025800 1.18937400 0.71905000

C 1.54762300 1.68995000 0.12765500  
N 0.33446900 1.29327200 0.51747200  
H -0.84174100 0.15321700 1.75044200  
H 1.15177100 -0.87034700 2.94491600  
H 3.67832100 1.49560700 0.37097300  
H 1.55788500 2.40664300 -0.68678100  
C 1.51638900 -0.13438900 -2.28900200  
C 0.78497100 -0.97138100 -1.41496600  
C 1.48455300 -2.01303800 -0.76496600  
C 2.84666100 -2.18761600 -0.96137400  
C 3.55700100 -1.34336900 -1.81779600  
C 2.87545600 -0.32751100 -2.49017000  
H 0.98587400 0.66365300 -2.79892100  
H 0.96152900 -2.65475800 -0.06180100  
H 3.36608800 -2.97985500 -0.43014100  
H 3.41259100 0.32325300 -3.17452100  
C -0.60338800 -0.67820800 -1.13750000  
O -1.02440200 0.58277300 -1.44067300  
H 4.62248900 -1.48448100 -1.96589300  
C -1.51240700 -1.59440300 -0.57245400  
C -2.79950000 -1.24067800 -0.24033400  
C 3.72326600 -0.34978300 2.33497000  
N 4.65541900 -0.83105500 2.82112800  
H -1.22963600 4.78625300 -0.20497500  
H -2.50716700 4.02899200 -1.18495500  
H -3.28200700 3.33596100 1.00578700  
H -1.62361200 3.30822400 1.65383200  
H -1.17109400 -2.61517200 -0.43705300  
N -3.77174500 -2.08820800 0.21900500  
C -4.86901400 -1.51805200 0.97460500  
H -5.75771200 -2.14705400 0.87241000  
H -4.63229000 -1.41978600 2.04471500  
H -5.09674600 -0.52512900 0.58251500  
C -3.42648100 -3.45724900 0.52330200  
H -4.33493100 -4.01166100 0.76646700  
H -2.95935300 -3.92498100 -0.34765500  
H -2.72929700 -3.53296500 1.37304700  
H -3.10911700 -0.20807600 -0.36859900

**INT2**

C 2.09028700 2.65921400 1.28650100  
C 1.88641000 3.63466200 0.10857500

B 0.75278400 1.73165900 -0.25518000  
 O 1.13676700 1.62624500 1.05749400  
 O 1.22754200 2.85475400 -0.88597400  
 C -0.23735600 -0.42663800 -0.37928000  
 H 3.09441200 2.22029300 1.28285600  
 H 2.82664000 4.02196600 -0.29054900  
 H 1.24652500 4.48034500 0.38426700  
 H 1.91005200 3.12083500 2.25997400  
 O -0.02713300 0.83164200 -0.91358900  
 C 0.91785100 -1.27527100 -0.22190900  
 C 0.86047800 -2.49103700 0.49396800  
 C 2.15969500 -0.90774400 -0.78445100  
 C 1.98197600 -3.29312100 0.62785100  
 H -0.06508400 -2.79242900 0.97308500  
 C 3.27725400 -1.71604200 -0.64120600  
 H 2.23190200 0.00297500 -1.37144100  
 C 3.20145600 -2.91605200 0.06362300  
 H 1.90896600 -4.21997000 1.18893000  
 H 4.21616800 -1.41032600 -1.09317600  
 H 4.07710300 -3.54676200 0.17388600  
 C -1.56908200 -0.78348300 -0.12593200  
 H -1.75668900 -1.80115500 0.19484100  
 C -2.61957300 0.08641900 -0.29802900  
 H -2.41722700 1.10638700 -0.60888800  
 N -3.94960300 -0.22178600 -0.16977700  
 C -4.31803600 -1.52740400 0.32834000  
 H -4.00239100 -1.68018200 1.37212000  
 H -5.40218200 -1.64065200 0.26884600  
 H -3.85689000 -2.30311800 -0.28920400  
 C -4.87510500 0.85679200 0.11299500  
 H -4.55736700 1.75431100 -0.42191200  
 H -5.87535900 0.58540100 -0.23499000  
 H -4.93021100 1.09339100 1.18595600

**INT3**

C 3.04032800 1.97064300 2.40459000  
 C 4.09602700 0.98492600 1.86203600  
 B 2.18177500 0.79848300 0.68173700  
 O 1.83300700 1.60049600 1.74247700  
 O 3.52448500 0.47688800 0.66089300  
 C 3.62686000 -1.86700500 -1.62761000  
 C 3.65566000 -2.76494300 -0.37315800

B 1.54850800 -2.16005200 -0.86239100  
 O 2.24649200 -1.80007100 -1.98302400  
 O 2.31516300 -2.73087500 0.12324300  
 C -0.63707500 -2.79999000 0.07745000  
 C -1.98222500 -2.73263300 0.12271900  
 C -2.63338700 -1.79151200 -0.77817700  
 C -1.92822900 -0.89686400 -1.49898800  
 C -0.44494800 -0.76311800 -1.30226000  
 N 0.12211400 -1.99701500 -0.74515400  
 H -0.07175500 -3.53424600 0.64385900  
 H -2.56443300 -3.39757800 0.74472000  
 H -2.42530500 -0.23520800 -2.19989900  
 H 0.06458300 -0.59080200 -2.25515800  
 C -0.06149300 0.44736300 -0.35830300  
 C -4.06777000 -1.84095500 -0.90887300  
 N -5.22298400 -1.87885400 -0.97535000  
 H 2.90363800 1.89453000 3.48572600  
 H 4.27086000 0.15467200 2.55547100  
 H 5.05152700 1.46743400 1.64301000  
 H 3.28150800 3.00841700 2.15124700  
 H 3.92279700 -3.80086000 -0.60768200  
 H 4.33262300 -2.38175800 0.39364900  
 H 4.19828000 -2.28187500 -2.46134100  
 H 3.98257800 -0.85813200 -1.39844500  
 O 1.37190200 0.31821300 -0.28712600  
 C -0.38836000 1.80569000 -0.98322400  
 C -0.63343900 1.97294900 -2.34824400  
 C -0.35713200 2.94527300 -0.16868000  
 C -0.86086500 3.23927700 -2.88355300  
 H -0.64481600 1.12321400 -3.02175800  
 C -0.57416900 4.20956100 -0.70408300  
 H -0.15629700 2.82574300 0.89056700  
 C -0.83283400 4.36153700 -2.06419300  
 H -1.05610500 3.34382800 -3.94598100  
 H -0.54547400 5.07920900 -0.05512700  
 H -1.00855600 5.34765800 -2.48222100  
 C -0.67385900 0.22955400 0.99964500  
 H -0.12119800 -0.44115600 1.64940700  
 C -1.90918600 0.64316500 1.31542900  
 H -2.46736600 1.26237100 0.61461100  
 N -2.59765500 0.38088000 2.48668400  
 C -1.96574800 -0.53335500 3.41341300  
 H -0.98382600 -0.14390200 3.69714300  
 H -2.58004000 -0.61294400 4.31286000

|   |             |             |            |
|---|-------------|-------------|------------|
| H | -1.82959800 | -1.53697600 | 2.97926500 |
| C | -4.03412600 | 0.20559100  | 2.34298100 |
| H | -4.42983400 | 0.97548700  | 1.67643000 |
| H | -4.30303800 | -0.77722200 | 1.92583400 |
| H | -4.51506900 | 0.31474000  | 3.31861300 |

#### INT4

|   |             |             |             |
|---|-------------|-------------|-------------|
| C | 4.85706900  | 0.44866700  | -0.92636000 |
| C | 4.90678100  | -1.00189700 | -0.40427200 |
| B | 2.75423100  | -0.29875600 | -0.52219100 |
| O | 3.50953800  | 0.84929800  | -0.73391100 |
| O | 3.55302700  | -1.42670300 | -0.40297700 |
| C | 1.30616700  | -3.60727900 | -0.94461300 |
| C | 1.30105500  | -3.34858600 | 0.57357000  |
| B | 0.55147200  | -1.43637600 | -0.51425000 |
| O | 0.96434500  | -2.37872100 | -1.53066900 |
| O | 0.46492000  | -2.22066200 | 0.73387000  |
| C | -1.83057200 | -1.69464100 | -1.23528600 |
| C | -3.11718900 | -1.35173100 | -1.52066200 |
| C | -3.42115600 | 0.06759500  | -1.51658600 |
| C | -2.47892800 | 0.99836300  | -1.25833600 |
| C | -1.05823100 | 0.61661700  | -0.89903800 |
| N | -0.86920100 | -0.83644800 | -0.83314700 |
| H | -1.50136400 | -2.73055600 | -1.26700300 |
| H | -3.84945300 | -2.07748200 | -1.84180500 |
| H | -2.71442500 | 2.05730000  | -1.28602300 |
| H | -0.35722800 | 1.05163100  | -1.62409200 |
| C | -0.76224700 | 1.29498400  | 0.44472900  |
| C | -4.76688100 | 0.49631200  | -1.81031200 |
| N | -5.85460000 | 0.82204900  | -2.03472300 |
| H | 5.52872600  | 1.11725500  | -0.38052600 |
| H | 5.30492700  | -1.05103900 | 0.61664800  |
| H | 5.50435000  | -1.65916900 | -1.04156500 |
| H | 5.10364700  | 0.50197800  | -1.99345400 |
| H | 0.90139900  | -4.19927600 | 1.14322800  |
| H | 2.31587800  | -3.13526400 | 0.93159200  |
| H | 0.56561100  | -4.37804000 | -1.21539500 |
| H | 2.28967300  | -3.94357200 | -1.29314200 |
| O | 1.42272000  | -0.25612900 | -0.42949900 |
| C | -0.12913300 | 2.62644600  | 0.44182800  |
| C | -0.65090500 | 3.64267600  | 1.25347400  |
| C | 0.99377200  | 2.88868300  | -0.35453700 |

|   |             |             |             |
|---|-------------|-------------|-------------|
| C | -0.06429000 | 4.90208600  | 1.26890300  |
| H | -1.53695200 | 3.44218700  | 1.84926700  |
| C | 1.58764700  | 4.14483900  | -0.31869700 |
| H | 1.43219700  | 2.09435200  | -0.94856900 |
| C | 1.05895300  | 5.15321800  | 0.48399200  |
| H | -0.48502100 | 5.68723300  | 1.88862100  |
| H | 2.47366300  | 4.33103200  | -0.91661700 |
| H | 1.52176200  | 6.13502000  | 0.49915200  |
| C | -1.11620400 | 0.70073600  | 1.60767000  |
| H | -0.77375000 | 1.11423200  | 2.55037500  |
| C | -1.81989500 | -0.55401400 | 1.59035400  |
| H | -2.58996600 | -0.73557600 | 0.84425200  |
| N | -1.65211200 | -1.50373500 | 2.45901800  |
| C | -0.57361400 | -1.46040200 | 3.44623200  |
| H | 0.36651600  | -1.58781100 | 2.90105200  |
| H | -0.58943400 | -0.51230000 | 3.98367400  |
| H | -0.72264300 | -2.27330900 | 4.15621800  |
| C | -2.25879200 | -2.81158500 | 2.22905800  |
| H | -3.01990600 | -2.72423800 | 1.45287000  |
| H | -1.46532200 | -3.47790700 | 1.87853000  |
| H | -2.69685300 | -3.18726500 | 3.15570300  |

#### INT5

|   |             |             |             |
|---|-------------|-------------|-------------|
| C | 3.79278300  | 3.10801500  | -0.09608400 |
| C | 4.55177600  | 1.98459200  | -0.83220100 |
| B | 2.42386100  | 1.34040400  | -0.42014000 |
| O | 2.43729400  | 2.68452200  | -0.09932700 |
| O | 3.67891200  | 0.86487200  | -0.76349900 |
| C | 1.93155900  | -2.26328400 | -2.26040800 |
| C | 2.98839300  | -2.22045000 | -1.14657800 |
| B | 1.26606100  | -0.80831300 | -0.59974500 |
| O | 1.09011000  | -1.16494400 | -1.97760700 |
| O | 2.30728200  | -1.62856600 | -0.05218400 |
| C | -0.33140800 | -2.68081500 | 0.01718700  |
| C | -1.48282300 | -3.26729300 | -0.30246200 |
| C | -2.68005900 | -2.45084400 | -0.53769100 |
| C | -2.58082800 | -1.11592300 | -0.60076700 |
| C | -1.26575800 | -0.41053500 | -0.41752000 |
| N | -0.18873500 | -1.25877300 | 0.19774200  |
| H | 0.58643000  | -3.22550700 | 0.20596800  |
| H | -1.54400000 | -4.34385300 | -0.40263200 |
| H | -3.44839200 | -0.49104600 | -0.79198400 |

|                 |             |             |             |   |             |             |             |
|-----------------|-------------|-------------|-------------|---|-------------|-------------|-------------|
| H               | -0.90941200 | -0.05145300 | -1.39110400 | O | 3.02559300  | 2.62049000  | 0.54604800  |
| C               | -1.45206600 | 0.72082400  | 0.57918800  | O | 3.99797900  | 0.83455800  | -0.52970400 |
| C               | -3.94905200 | -3.10559200 | -0.71116400 | C | 2.86686800  | -1.74505800 | -1.87206800 |
| N               | -4.96071900 | -3.65097700 | -0.84591900 | C | 3.12389200  | -2.42363100 | -0.50860800 |
| H               | 4.13538800  | 3.21601800  | 0.93991900  | B | 1.60623900  | -0.69831300 | -0.26586800 |
| H               | 5.50797700  | 1.74034200  | -0.36259200 | O | 1.72694600  | -0.93423300 | -1.66657200 |
| H               | 4.73299800  | 2.23821700  | -1.88306500 | O | 2.43117200  | -1.63526900 | 0.44036500  |
| H               | 3.88308400  | 4.07662700  | -0.59426600 | C | -0.18828300 | -2.46536100 | -0.23176500 |
| H               | 3.35594400  | -3.21334200 | -0.86587700 | C | -1.21571600 | -2.92555700 | -0.93899800 |
| H               | 3.83732200  | -1.58840300 | -1.43262400 | C | -2.28172600 | -2.01170900 | -1.36602900 |
| H               | 1.36058000  | -3.20401600 | -2.23338600 | C | -2.14544400 | -0.69041700 | -1.19366600 |
| H               | 2.36574600  | -2.15630700 | -3.25941900 | C | -0.91374300 | -0.09771200 | -0.57019000 |
| O               | 1.30424700  | 0.60624100  | -0.36762500 | N | -0.01925400 | -1.08019800 | 0.12847700  |
| C               | -2.19668900 | 1.93588400  | 0.21075800  | H | 0.61725700  | -3.09433100 | 0.12525300  |
| C               | -3.13631600 | 2.49152800  | 1.08572000  | H | -1.27941700 | -3.97580500 | -1.19514000 |
| C               | -1.95812400 | 2.55650600  | -1.02114500 | H | -2.92540000 | 0.00359600  | -1.49252200 |
| C               | -3.82028800 | 3.65136400  | 0.73870600  | H | -0.31072100 | 0.39171500  | -1.34646900 |
| H               | -3.33529900 | 1.99729400  | 2.03204000  | C | -1.30411600 | 0.88134500  | 0.52272100  |
| C               | -2.64241600 | 3.71721400  | -1.36423800 | C | -3.47481500 | -2.55956100 | -1.95381000 |
| H               | -1.20656100 | 2.14867800  | -1.69060200 | N | -4.42763000 | -3.02088100 | -2.42121100 |
| C               | -3.57591500 | 4.26511600  | -0.48749700 | H | 4.81228300  | 3.57869900  | 0.94484700  |
| H               | -4.55030500 | 4.07207500  | 1.42247300  | H | 5.70793100  | 1.40425200  | 0.46946600  |
| H               | -2.44230700 | 4.19801100  | -2.31608000 | H | 5.61713600  | 1.91151900  | -1.23203700 |
| H               | -4.11261600 | 5.16807100  | -0.75964200 | H | 4.19022100  | 3.76725600  | -0.70885200 |
| C               | -0.91028500 | 0.41816300  | 1.75283100  | H | 2.73972500  | -3.45533700 | -0.49718800 |
| H               | -0.91033900 | 1.05120500  | 2.63238000  | H | 4.18903000  | -2.45685800 | -0.25824800 |
| C               | -0.23995400 | -0.92546400 | 1.77852800  | H | 2.66951000  | -2.47196900 | -2.66722800 |
| H               | -0.92178800 | -1.70178400 | 2.15327600  | H | 3.71947400  | -1.12076600 | -2.16122200 |
| N               | 0.93798800  | -1.00099600 | 2.52418500  | O | 1.69634000  | 0.66446300  | 0.18254700  |
| C               | 1.94302400  | 0.05045900  | 2.49260600  | C | -2.04844500 | 2.11338200  | 0.21444000  |
| H               | 1.48692100  | 0.99940000  | 2.20542000  | C | -2.91399900 | 2.67383600  | 1.16254500  |
| H               | 2.36912300  | 0.15189500  | 3.49741100  | C | -1.91393800 | 2.74200100  | -1.02921700 |
| H               | 2.75005900  | -0.18059200 | 1.78621100  | C | -3.60977100 | 3.84234600  | 0.88211300  |
| C               | 1.46488100  | -2.31324900 | 2.84426500  | H | -3.05100800 | 2.17465500  | 2.11712000  |
| H               | 0.63904500  | -3.02165500 | 2.96287600  | C | -2.61462900 | 3.91073200  | -1.31014300 |
| H               | 2.14864300  | -2.67918100 | 2.06788000  | H | -1.24109200 | 2.33085100  | -1.77565000 |
| H               | 2.00701500  | -2.26021800 | 3.79452800  | C | -3.46250500 | 4.46488400  | -0.35616200 |
|                 |             |             |             | H | -4.27754800 | 4.26311300  | 1.62670700  |
|                 |             |             |             | H | -2.49378300 | 4.38994000  | -2.27602400 |
|                 |             |             |             | H | -4.01091300 | 5.37457000  | -0.57710200 |
|                 |             |             |             | C | -0.90529100 | 0.44862200  | 1.71609700  |
|                 |             |             |             | H | -1.03594300 | 0.97294200  | 2.65544100  |
|                 |             |             |             | C | -0.17171700 | -0.85715100 | 1.68691600  |
|                 |             |             |             | H | 0.85724800  | -0.74805500 | 2.03920600  |
| <b>INT5-iso</b> |             |             |             |   |             |             |             |
| C               | 4.30673800  | 3.06385300  | 0.12382600  |   |             |             |             |
| C               | 5.03870200  | 1.77765900  | -0.31426800 |   |             |             |             |
| B               | 2.85364600  | 1.33697000  | 0.06989000  |   |             |             |             |

|   |             |             |            |   |             |             |             |
|---|-------------|-------------|------------|---|-------------|-------------|-------------|
| N | -0.78469000 | -1.88550600 | 2.43472700 | H | -2.38089400 | -3.43569000 | -1.97361700 |
| C | -2.20290600 | -2.15427000 | 2.30129400 | H | -1.62178400 | -1.83516200 | -1.99676700 |
| H | -2.60840600 | -2.46458300 | 3.27068000 | C | -2.37023800 | -3.70291500 | 0.67814200  |
| H | -2.72677700 | -1.25026400 | 1.98423200 | H | -2.81010400 | -3.46649400 | 1.65154600  |
| H | -2.41414700 | -2.95054800 | 1.57331400 | H | -3.03186700 | -4.40842100 | 0.16823500  |
| C | 0.01085700  | -3.03102200 | 2.82979000 | H | -1.40379200 | -4.21033300 | 0.84694900  |
| H | 1.07275200  | -2.78114100 | 2.76649200 |   |             |             |             |
| H | -0.22730200 | -3.31670100 | 3.86093900 |   |             |             |             |
| H | -0.17284200 | -3.90728500 | 2.18955600 |   |             |             |             |

**INT6**

|   |             |             |             |
|---|-------------|-------------|-------------|
| C | -2.80663900 | 0.56667100  | -0.20218900 |
| C | -2.75819600 | 1.91663100  | -0.28691300 |
| C | -1.47330700 | 2.55001400  | -0.00540900 |
| C | -0.32298300 | 1.84546500  | 0.01162300  |
| C | -0.37881500 | 0.42062900  | -0.48053100 |
| N | -1.66160200 | -0.17062500 | -0.11978500 |
| H | -3.73167400 | -0.00279700 | -0.17074600 |
| H | -3.65387000 | 2.51160700  | -0.39199300 |
| H | 0.61256300  | 2.27493100  | 0.35404800  |
| H | -0.26218000 | 0.41384700  | -1.58326900 |
| C | 0.60853600  | -0.55037000 | 0.13791100  |
| C | -1.46781200 | 3.93803600  | 0.38357100  |
| N | -1.47562500 | 5.05606800  | 0.68268300  |
| C | 2.06147600  | -0.33444600 | 0.04749500  |
| C | 2.94209400  | -0.98747500 | 0.91950500  |
| C | 2.59151600  | 0.53738500  | -0.91190500 |
| C | 4.31259700  | -0.78934700 | 0.82195300  |
| H | 2.54370100  | -1.63970800 | 1.69069600  |
| C | 3.96515600  | 0.73558700  | -1.00906200 |
| H | 1.92732300  | 1.06270900  | -1.59238300 |
| C | 4.82969000  | 0.07182800  | -0.14485600 |
| H | 4.98039500  | -1.29998600 | 1.50831400  |
| H | 4.35843700  | 1.41345700  | -1.75949500 |
| H | 5.90070600  | 0.23026600  | -0.21660300 |
| C | -0.04428400 | -1.56601400 | 0.71181700  |
| H | 0.41679800  | -2.42199200 | 1.19200900  |
| C | -1.54880200 | -1.43369000 | 0.59191500  |
| H | -2.01878200 | -1.37347400 | 1.58557900  |
| N | -2.25510800 | -2.49440900 | -0.11779900 |
| C | -1.70192700 | -2.76915300 | -1.43503100 |
| H | -0.70701200 | -3.24299600 | -1.39641300 |

**INT6-iso**

|   |             |             |             |
|---|-------------|-------------|-------------|
| C | -2.55190400 | 0.16451100  | -1.22136600 |
| C | -2.68728300 | 1.47538900  | -0.89919900 |
| C | -1.63273100 | 2.06646500  | -0.08289200 |
| C | -0.42205900 | 1.47949800  | 0.03257800  |
| C | -0.15236100 | 0.32012700  | -0.89468600 |
| N | -1.36306700 | -0.48231100 | -1.04296800 |
| H | -3.37286500 | -0.42928100 | -1.61558100 |
| H | -3.60617000 | 2.01261700  | -1.08527500 |
| H | 0.32078200  | 1.81301200  | 0.74956000  |
| H | 0.13351300  | 0.71207200  | -1.88916800 |
| C | 0.86365000  | -0.70122500 | -0.42958900 |
| C | -1.95342200 | 3.22439200  | 0.71273000  |
| N | -2.22122000 | 4.16074600  | 1.33810900  |
| C | 2.26785300  | -0.33440700 | -0.18661600 |
| C | 3.12221900  | -1.18574400 | 0.52714700  |
| C | 2.77594700  | 0.88247800  | -0.65772500 |
| C | 4.44805500  | -0.83851700 | 0.74582000  |
| H | 2.73659900  | -2.11876800 | 0.92623200  |
| C | 4.10475100  | 1.23120900  | -0.43586400 |
| H | 2.13106700  | 1.56330700  | -1.20573300 |
| C | 4.94536400  | 0.37162300  | 0.26348700  |
| H | 5.09489500  | -1.50895700 | 1.30222500  |
| H | 4.48120000  | 2.17745800  | -0.81019100 |
| H | 5.98069900  | 0.64410300  | 0.43940900  |
| C | 0.28602000  | -1.90044400 | -0.31079800 |
| H | 0.76791700  | -2.82486200 | -0.01647900 |
| C | -1.19761400 | -1.87371500 | -0.58371000 |
| H | -1.47408800 | -2.56405200 | -1.39344200 |
| N | -1.95946200 | -2.27951900 | 0.57943800  |
| C | -1.83831500 | -1.37516300 | 1.71343700  |
| H | -2.28965400 | -1.84620900 | 2.59063300  |
| H | -0.78516900 | -1.18385100 | 1.93022400  |
| H | -2.33831300 | -0.40768600 | 1.54091700  |
| C | -3.34783100 | -2.61693800 | 0.31604000  |

|   |             |             |             |
|---|-------------|-------------|-------------|
| H | -3.41497700 | -3.24617200 | -0.57598900 |
| H | -3.74500600 | -3.18630400 | 1.16167000  |
| H | -3.99622900 | -1.73606800 | 0.17616700  |

**INT7**

|   |             |             |             |
|---|-------------|-------------|-------------|
| C | 2.34481000  | 0.83993800  | -1.39801700 |
| C | 2.33910800  | 2.15351800  | -1.12149900 |
| C | 1.22329700  | 2.74469100  | -0.38174300 |
| C | 0.07180000  | 1.97713600  | -0.21894900 |
| C | 0.07438000  | 0.62225600  | -0.51729100 |
| N | 1.34783500  | 0.00054700  | -0.85639800 |
| H | 3.09091800  | 0.35775700  | -2.02181500 |
| H | 3.11825300  | 2.79422900  | -1.51641400 |
| H | -0.85397600 | 2.44683500  | 0.09950200  |
| H | 0.29917800  | -0.22769400 | 1.28405200  |
| C | -0.91488800 | -0.38171100 | -0.67923700 |
| C | 1.25131300  | 4.10638000  | 0.00974600  |
| N | 1.28546800  | 5.22033700  | 0.34602600  |
| C | -2.35153600 | -0.21260100 | -0.39263100 |
| C | -3.30960100 | -0.81076700 | -1.22025900 |
| C | -2.79323700 | 0.51716500  | 0.71876100  |
| C | -4.66632700 | -0.67797100 | -0.94849500 |
| H | -2.97600000 | -1.36511200 | -2.09213200 |
| C | -4.15101500 | 0.65312100  | 0.98867100  |
| H | -2.06267700 | 0.97431800  | 1.38108200  |
| C | -5.09350900 | 0.05540800  | 0.15635300  |
| H | -5.39414400 | -1.14274500 | -1.60616400 |
| H | -4.47272200 | 1.22449000  | 1.85366000  |
| H | -6.15280700 | 0.16146500  | 0.36590400  |
| C | -0.31928400 | -1.54851900 | -1.10854500 |
| H | -0.84647400 | -2.44880100 | -1.39162000 |
| C | 1.16267200  | -1.37583500 | -1.21816700 |
| H | 1.61591900  | -1.63045400 | -2.20350800 |
| N | 1.92516300  | -2.26273100 | -0.21049700 |
| C | 1.59158300  | -3.67241100 | -0.40582300 |
| H | 1.82481200  | -4.00354200 | -1.43021400 |
| H | 2.16487700  | -4.28771800 | 0.29220300  |
| H | 0.52741700  | -3.82660500 | -0.22082700 |
| C | 3.36857600  | -2.05860000 | -0.34228700 |
| H | 3.71780000  | -2.29616000 | -1.36006500 |
| H | 3.61624400  | -1.01765200 | -0.12366900 |
| H | 3.90058400  | -2.70351600 | 0.36256400  |

|   |             |             |            |
|---|-------------|-------------|------------|
| N | 0.94437000  | -0.83067100 | 1.83355400 |
| C | 0.19032200  | -1.59953900 | 2.83660100 |
| H | 0.86985400  | -2.27277700 | 3.36258100 |
| H | -0.28208800 | -0.92549800 | 3.55380100 |
| H | -0.57482300 | -2.17681000 | 2.31527700 |
| C | 2.01049200  | 0.03998700  | 2.36989200 |
| H | 2.78966000  | -0.57935700 | 2.81902900 |
| H | 2.41484200  | 0.62399800  | 1.54001500 |
| H | 1.59733900  | 0.71449000  | 3.12229300 |
| H | 1.37442400  | -1.51539400 | 1.06318700 |

**product(P)**

|   |             |             |             |
|---|-------------|-------------|-------------|
| C | 2.89223300  | -1.50929800 | 0.09859100  |
| C | 3.45742400  | -0.28343500 | 0.00263200  |
| C | 2.62116100  | 0.87928400  | -0.10374900 |
| C | 1.25489600  | 0.75053400  | -0.08536600 |
| C | 0.66883700  | -0.52699400 | 0.04495700  |
| N | 1.52177600  | -1.64308700 | 0.10798300  |
| H | 3.45835700  | -2.43002900 | 0.16627900  |
| H | 4.53459400  | -0.18173000 | -0.00331800 |
| H | 0.61020900  | 1.61668900  | -0.18133700 |
| C | -0.64646300 | -1.00169200 | 0.07429200  |
| C | 3.22433300  | 2.17411500  | -0.23936400 |
| N | 3.71992900  | 3.21509200  | -0.34745700 |
| C | -1.87028700 | -0.18829200 | 0.04291300  |
| C | -1.96143600 | 1.00999200  | 0.76255700  |
| C | -2.98189200 | -0.61143200 | -0.69649700 |
| C | -3.12418800 | 1.77265700  | 0.72773000  |
| H | -1.12544400 | 1.32482300  | 1.38039000  |
| C | -4.14766300 | 0.14560000  | -0.72094900 |
| H | -2.91725300 | -1.53290800 | -1.26807100 |
| C | -4.22135000 | 1.34352400  | -0.01393500 |
| H | -3.17699600 | 2.69737700  | 1.29351000  |
| H | -4.99863900 | -0.19538200 | -1.30217400 |
| H | -5.12979700 | 1.93634600  | -0.03721100 |
| C | -0.56282500 | -2.40943900 | 0.14035700  |
| H | -1.40166800 | -3.08878700 | 0.19664000  |
| C | 0.76718400  | -2.77871000 | 0.16553400  |
| H | 1.23491700  | -3.74892500 | 0.23338900  |

**INT-A**

|   |             |             |             |                  |             |             |             |
|---|-------------|-------------|-------------|------------------|-------------|-------------|-------------|
| C | -3.38191400 | 0.66274100  | 2.13910100  | H                | 3.79980900  | 3.35362700  | 0.53921000  |
| C | -3.00485100 | 1.84702200  | 1.22605700  | H                | 3.31923200  | 4.85235800  | -0.27195700 |
| B | -1.37638600 | 0.27446000  | 1.18243800  | H                | 2.45553600  | 4.31812800  | 1.18928800  |
| O | -2.20489800 | -0.13709800 | 2.19948300  |                  |             |             |             |
| O | -1.83437700 | 1.40543900  | 0.53653000  |                  |             |             |             |
| C | -1.15408100 | -3.03374100 | -0.57526700 |                  |             |             |             |
| C | -2.42247100 | -2.37719100 | -0.51062000 |                  |             |             |             |
| C | -2.53575400 | -1.13332800 | -1.16957000 |                  |             |             |             |
| C | -1.42250100 | -0.53966100 | -1.70735700 |                  |             |             |             |
| C | -0.08261800 | -1.11605700 | -1.41746600 |                  |             |             |             |
| N | -0.06734500 | -2.51371600 | -1.04148400 |                  |             |             |             |
| H | -1.09179900 | -4.06699500 | -0.23327600 |                  |             |             |             |
| H | -3.27726900 | -2.84636900 | -0.04156800 |                  |             |             |             |
| H | -1.50804000 | 0.39399300  | -2.25077400 |                  |             |             |             |
| H | 0.59522600  | -0.97691700 | -2.26852700 |                  |             |             |             |
| C | 0.60823500  | -0.28587800 | -0.22025700 |                  |             |             |             |
| C | -3.80749900 | -0.45703100 | -1.22380500 |                  |             |             |             |
| N | -4.81881300 | 0.10629300  | -1.21349900 |                  |             |             |             |
| H | -3.66681000 | 0.97687800  | 3.14605900  |                  |             |             |             |
| H | -2.75870600 | 2.74776600  | 1.79870900  |                  |             |             |             |
| H | -3.78719600 | 2.08081700  | 0.50054400  |                  |             |             |             |
| H | -4.19780900 | 0.07132900  | 1.70808600  |                  |             |             |             |
| O | -0.25573900 | -0.43780000 | 0.90339400  |                  |             |             |             |
| C | 1.92410500  | -0.97410000 | 0.12125700  |                  |             |             |             |
| C | 2.95403400  | -1.00692600 | -0.82368700 |                  |             |             |             |
| C | 2.11784600  | -1.59176700 | 1.35429200  |                  |             |             |             |
| C | 4.15562800  | -1.64340500 | -0.53932500 |                  |             |             |             |
| H | 2.81859600  | -0.51564600 | -1.78354500 |                  |             |             |             |
| C | 3.32579100  | -2.22509500 | 1.64095400  |                  |             |             |             |
| H | 1.31732600  | -1.57701400 | 2.08362400  |                  |             |             |             |
| C | 4.34660300  | -2.25551500 | 0.69818800  |                  |             |             |             |
| H | 4.94483700  | -1.66104800 | -1.28446300 |                  |             |             |             |
| H | 3.46404600  | -2.69955300 | 2.60754400  |                  |             |             |             |
| H | 5.28525300  | -2.75230600 | 0.92194200  |                  |             |             |             |
| C | 0.78168600  | 1.15727100  | -0.61688400 |                  |             |             |             |
| H | -0.07677400 | 1.63157500  | -1.07454900 |                  |             |             |             |
| C | 1.86088100  | 1.89203300  | -0.29454700 |                  |             |             |             |
| H | 2.69858600  | 1.43415600  | 0.22618200  |                  |             |             |             |
| N | 2.05390200  | 3.22115800  | -0.59406000 |                  |             |             |             |
| C | 0.92874500  | 3.95217700  | -1.13536300 |                  |             |             |             |
| H | 0.06788000  | 3.95406500  | -0.44891800 |                  |             |             |             |
| H | 1.23115300  | 4.98172700  | -1.33545200 |                  |             |             |             |
| H | 0.61033600  | 3.49798400  | -2.07841400 |                  |             |             |             |
| C | 2.94553600  | 3.97656100  | 0.26531500  |                  |             |             |             |
|   |             |             |             | <b>INT3-iso2</b> |             |             |             |
|   |             |             |             | C                | 5.26272100  | 0.48780500  | 1.44774300  |
|   |             |             |             | C                | 5.46953500  | -1.03927100 | 1.54847700  |
|   |             |             |             | B                | 3.33537400  | -0.58196200 | 1.03115800  |
|   |             |             |             | O                | 3.84891100  | 0.64858900  | 1.34419400  |
|   |             |             |             | O                | 4.25318000  | -1.59856900 | 1.05603700  |
|   |             |             |             | C                | 0.74532000  | -2.98675100 | -1.38667800 |
|   |             |             |             | C                | -0.05761500 | -4.11025600 | -0.69988100 |
|   |             |             |             | B                | -1.15369700 | -2.15206900 | -0.51509800 |
|   |             |             |             | O                | -0.15055700 | -1.87186700 | -1.41147600 |
|   |             |             |             | O                | -1.10567900 | -3.43014000 | -0.01097400 |
|   |             |             |             | C                | -3.35022500 | -1.73595200 | 0.42945600  |
|   |             |             |             | C                | -4.50947500 | -1.06091100 | 0.44985300  |
|   |             |             |             | C                | -4.55682200 | 0.24085900  | -0.21627100 |
|   |             |             |             | C                | -3.44557700 | 0.81242300  | -0.71079300 |
|   |             |             |             | C                | -2.09050700 | 0.18395700  | -0.54958800 |
|   |             |             |             | N                | -2.19521200 | -1.23557300 | -0.16345200 |
|   |             |             |             | H                | -3.24896100 | -2.73491300 | 0.83957000  |
|   |             |             |             | H                | -5.39730800 | -1.47827300 | 0.90342000  |
|   |             |             |             | H                | -3.49116100 | 1.77512700  | -1.20839400 |
|   |             |             |             | H                | -1.56629700 | 0.19688800  | -1.51323200 |
|   |             |             |             | C                | 1.17836200  | 0.20484400  | 0.36358000  |
|   |             |             |             | C                | -5.82759900 | 0.90261000  | -0.35834000 |
|   |             |             |             | N                | -6.85804200 | 1.41939500  | -0.46353300 |
|   |             |             |             | H                | 5.62975800  | 1.02555700  | 2.32457100  |
|   |             |             |             | H                | 5.61879900  | -1.36502600 | 2.58335700  |
|   |             |             |             | H                | 6.30736800  | -1.39373400 | 0.94392200  |
|   |             |             |             | H                | 5.73261700  | 0.90715500  | 0.55193600  |
|   |             |             |             | H                | -0.49864800 | -4.80272700 | -1.42475600 |
|   |             |             |             | H                | 0.54064300  | -4.67872300 | 0.01532700  |
|   |             |             |             | H                | 1.03682500  | -3.24002100 | -2.40903700 |
|   |             |             |             | H                | 1.63232900  | -2.70931800 | -0.80854200 |
|   |             |             |             | O                | 2.02742900  | -0.82502400 | 0.72932000  |
|   |             |             |             | C                | 1.68976400  | 1.06943900  | -0.73047000 |
|   |             |             |             | C                | 2.16498600  | 0.48206100  | -1.90663900 |
|   |             |             |             | C                | 1.73253500  | 2.45861000  | -0.58930300 |
|   |             |             |             | C                | 2.65571000  | 1.27814100  | -2.93633400 |
|   |             |             |             | H                | 2.12444700  | -0.59786100 | -2.01182700 |



|   |             |             |             |
|---|-------------|-------------|-------------|
| C | 2.22158200  | 3.25263600  | -1.62101800 |
| H | 1.39824300  | 2.90261500  | 0.34402400  |
| C | 2.68223700  | 2.66379900  | -2.79643200 |
| H | 3.01271700  | 0.81767800  | -3.85203700 |
| H | 2.25459300  | 4.33092400  | -1.50290400 |
| H | 3.06473300  | 3.28403000  | -3.60070200 |
| C | -0.03604200 | 0.25487100  | 0.91105200  |
| H | -0.25286300 | -0.47682100 | 1.68601800  |
| C | -1.18234600 | 1.07938100  | 0.38429000  |
| H | -0.78551400 | 1.84101100  | -0.29531100 |
| N | -1.94293500 | 1.81558800  | 1.38918100  |
| C | -1.20000000 | 2.96232100  | 1.87961900  |
| H | -0.93371000 | 3.61815200  | 1.04449800  |
| H | -1.82946100 | 3.53132400  | 2.56973100  |
| H | -0.27239800 | 2.68195300  | 2.41201400  |
| C | -2.42715000 | 1.00785700  | 2.49655500  |
| H | -2.95004400 | 0.12464200  | 2.12522300  |
| H | -1.62270800 | 0.68218400  | 3.17896200  |
| H | -3.14169200 | 1.59770000  | 3.07842800  |

**INT-C**

|   |             |             |             |
|---|-------------|-------------|-------------|
| C | -4.79387500 | 0.24467000  | -0.74437600 |
| C | -4.78836900 | -0.16867800 | 0.73870500  |
| B | -2.75023800 | -0.57415100 | -0.16394100 |
| O | -3.42332300 | 0.20730000  | -1.12242500 |
| O | -3.57786100 | -0.88578400 | 0.89853600  |
| C | -0.71811500 | -1.38581000 | 3.06295000  |
| C | -1.52311000 | -2.61302600 | 2.61375800  |
| B | -0.67621100 | -1.50124700 | 0.78007800  |
| O | -0.66238100 | -0.57361000 | 1.90844800  |
| O | -1.20628900 | -2.75849200 | 1.24889400  |
| C | 1.12102100  | -2.75500700 | -0.50153900 |
| C | 2.33239200  | -2.96393100 | -1.08819500 |
| C | 3.35666200  | -1.98819400 | -0.79609000 |
| C | 3.12966800  | -0.90862500 | -0.01542700 |
| C | 1.74999300  | -0.62015200 | 0.53100200  |
| N | 0.79704500  | -1.68608100 | 0.25495500  |
| H | 0.31000100  | -3.47232100 | -0.60119900 |
| H | 2.54862500  | -3.84810900 | -1.66777900 |
| H | 3.92244400  | -0.20782900 | 0.22258900  |
| H | 1.80051300  | -0.43723000 | 1.61501700  |
| C | 1.27651500  | 0.70419800  | -0.08724800 |

|   |             |             |             |
|---|-------------|-------------|-------------|
| C | 4.68604900  | -2.18487300 | -1.32300000 |
| N | 5.74602000  | -2.34341300 | -1.76035000 |
| H | -5.36153900 | -0.46435900 | -1.35904100 |
| H | -5.63879600 | -0.80241700 | 1.00265400  |
| H | -4.78595600 | 0.70659800  | 1.39983900  |
| H | -5.20212700 | 1.24766300  | -0.90384700 |
| H | -1.25204100 | -3.51661500 | 3.17234500  |
| H | -2.59899600 | -2.42809800 | 2.73529100  |
| H | 0.29673600  | -1.68535900 | 3.37530100  |
| H | -1.18805500 | -0.83909100 | 3.88818400  |
| O | -1.47920400 | -0.92776800 | -0.34154400 |
| C | 1.53380000  | 1.95999500  | 0.62904200  |
| C | 2.15354400  | 3.03454200  | -0.02481100 |
| C | 1.17437300  | 2.08098100  | 1.98034000  |
| C | 2.41674700  | 4.21418900  | 0.66358100  |
| H | 2.45805600  | 2.91930600  | -1.06136000 |
| C | 1.42597800  | 3.27000900  | 2.65390500  |
| H | 0.64780600  | 1.25599800  | 2.45251900  |
| C | 2.05172500  | 4.33241700  | 2.00238400  |
| H | 2.91353300  | 5.03581100  | 0.15828100  |
| H | 1.13122100  | 3.36989300  | 3.69331400  |
| H | 2.25680800  | 5.25268100  | 2.53974300  |
| C | 0.64114300  | 0.62286700  | -1.28705100 |
| H | 0.56151700  | -0.35670300 | -1.74246200 |
| C | -0.24446400 | 1.64380600  | -1.70165700 |
| H | -0.24343100 | 2.59884500  | -1.18123400 |
| N | -1.15891200 | 1.48461000  | -2.61686100 |
| C | -1.31016500 | 0.21264900  | -3.33522000 |
| H | -1.41298200 | -0.59186900 | -2.60356800 |
| H | -2.21219000 | 0.27054500  | -3.94107700 |
| H | -0.44229000 | 0.04661100  | -3.97767200 |
| C | -2.17227100 | 2.50212000  | -2.86942500 |
| H | -1.94504900 | 3.39725300  | -2.29088900 |
| H | -2.18615900 | 2.74741600  | -3.93380000 |
| H | -3.13746600 | 2.09450100  | -2.56110000 |

**INT-D**

|   |             |             |             |
|---|-------------|-------------|-------------|
| C | -2.83546700 | -1.58811100 | -0.34877800 |
| C | -3.34876000 | -0.28405400 | -0.30823200 |
| C | -2.57641600 | 0.82760500  | -0.07287900 |
| C | -1.10035700 | 0.68166200  | 0.20430400  |
| C | -0.61340000 | -0.57930500 | -0.51762500 |

|   |             |             |             |
|---|-------------|-------------|-------------|
| N | -1.49391000 | -1.74549700 | -0.25261100 |
| H | -3.44567500 | -2.47919700 | -0.35903200 |
| H | -4.42104900 | -0.16506700 | -0.42291600 |
| H | -0.55707700 | 1.52265400  | -0.24672500 |
| H | -0.73004300 | -0.38117900 | -1.59442100 |
| C | 0.76017200  | -1.10574500 | -0.20860100 |
| C | -3.16112900 | 2.11198700  | 0.09254600  |
| N | -3.61401800 | 3.17557300  | 0.20716400  |
| C | 1.95420100  | -0.27246000 | -0.18239900 |
| C | 3.05655100  | -0.62887600 | 0.61455100  |
| C | 2.03143700  | 0.91312100  | -0.93201000 |
| C | 4.19292600  | 0.16555600  | 0.65043800  |
| H | 3.00096200  | -1.52461000 | 1.22581800  |
| C | 3.16931200  | 1.71214400  | -0.88562900 |
| H | 1.21118400  | 1.19287600  | -1.58669100 |
| C | 4.25383700  | 1.34259500  | -0.09648600 |
| H | 5.03132100  | -0.12504600 | 1.27513100  |
| H | 3.20942200  | 2.62165600  | -1.47591300 |
| H | 5.14045000  | 1.96645600  | -0.06019500 |
| C | 0.63417700  | -2.43429300 | 0.05940000  |
| H | 1.43853500  | -3.12410300 | 0.27906300  |
| C | -0.74081500 | -2.80898200 | 0.02202600  |
| H | -1.19049200 | -3.77238500 | 0.21279400  |
| O | -0.88027900 | 0.63906100  | 1.59589600  |
| H | 0.05258300  | 0.82786300  | 1.76029300  |

**INT-E**

|   |             |             |             |
|---|-------------|-------------|-------------|
| C | 2.85354800  | 1.72460600  | -0.12408800 |
| C | 3.38547300  | 0.33496000  | 0.00440000  |
| C | 2.61770400  | -0.75683400 | -0.00344600 |
| C | 1.11516700  | -0.74120300 | -0.16988100 |
| C | 0.58201800  | 0.66510200  | -0.18108400 |
| N | 1.40697900  | 1.75790700  | -0.12434200 |
| H | 3.22573900  | 2.33219000  | 0.70941900  |
| H | 4.46240100  | 0.23839000  | 0.09993600  |
| H | 0.90462100  | -1.22527400 | -1.13699200 |
| C | -0.72671900 | 1.11742700  | -0.14565700 |
| C | 3.22314100  | -2.05719400 | 0.12328100  |
| N | 3.71945400  | -3.09908900 | 0.20353300  |
| C | -1.94541100 | 0.29041300  | -0.12373900 |
| C | -3.02732300 | 0.65541700  | 0.68850000  |
| C | -2.06068400 | -0.87295300 | -0.89830400 |

|   |             |             |             |
|---|-------------|-------------|-------------|
| C | -4.17994600 | -0.12004600 | 0.73150500  |
| H | -2.94570800 | 1.54682400  | 1.30319200  |
| C | -3.20899400 | -1.65870800 | -0.84218600 |
| H | -1.25733200 | -1.14502900 | -1.57762900 |
| C | -4.27346100 | -1.28501900 | -0.02739800 |
| H | -5.00496400 | 0.17913200  | 1.37019000  |
| H | -3.27573400 | -2.55574800 | -1.44948900 |
| H | -5.17008900 | -1.89431900 | 0.01394400  |
| C | -0.66963500 | 2.53853000  | -0.06330300 |
| H | -1.51530300 | 3.21036700  | -0.03662500 |
| C | 0.65274500  | 2.90020700  | -0.06078200 |
| H | 1.12600400  | 3.87046900  | -0.02877200 |
| O | 0.58378500  | -1.52005700 | 0.87955900  |
| H | -0.37071600 | -1.59349700 | 0.74248000  |
| H | 3.24003600  | 2.17698200  | -1.04737300 |

**INT-F**

|   |             |             |             |
|---|-------------|-------------|-------------|
| C | 2.71530000  | 1.64861900  | -0.10039900 |
| C | 3.32905300  | 0.47730800  | -0.25317100 |
| C | 2.51336600  | -0.77481000 | -0.51008800 |
| C | 1.14670900  | -0.70481600 | 0.19949700  |
| C | 0.50668500  | 0.61600400  | -0.10906100 |
| N | 1.31758200  | 1.73144200  | -0.12939300 |
| H | 3.23460100  | 2.58663500  | 0.05474400  |
| H | 4.40855500  | 0.41121300  | -0.22049300 |
| H | 0.51348200  | -1.52605500 | -0.15535400 |
| C | -0.80540000 | 1.04348800  | -0.15502700 |
| C | 3.24479900  | -1.98705100 | -0.11736700 |
| N | 3.83526100  | -2.94060600 | 0.15797200  |
| C | -2.01481800 | 0.20190000  | -0.12734800 |
| C | -3.10516200 | 0.56569400  | 0.67209900  |
| C | -2.10967500 | -0.96175100 | -0.90062000 |
| C | -4.25258200 | -0.21909100 | 0.70745600  |
| H | -3.03831400 | 1.46472500  | 1.27809100  |
| C | -3.25324100 | -1.75237300 | -0.85683900 |
| H | -1.29070500 | -1.22658000 | -1.56319900 |
| C | -4.32814700 | -1.38437000 | -0.05185200 |
| H | -5.08758200 | 0.07613700  | 1.33481900  |
| H | -3.30996100 | -2.65040600 | -1.46358400 |
| H | -5.22194000 | -1.99870300 | -0.02113800 |
| C | -0.77232100 | 2.47330400  | -0.20798200 |
| H | -1.63061800 | 3.12464900  | -0.28528400 |

|   |            |             |             |
|---|------------|-------------|-------------|
| C | 0.54070700 | 2.86183200  | -0.19325600 |
| H | 0.99603700 | 3.83926000  | -0.25100000 |
| O | 1.41524200 | -0.83673700 | 1.58141200  |
| H | 0.58408200 | -0.71161400 | 2.05447900  |
| H | 2.31888200 | -0.85453800 | -1.58967400 |

**INT-G**

|   |             |             |             |
|---|-------------|-------------|-------------|
| C | 2.64582000  | -1.13034500 | 1.24931500  |
| C | 3.22703700  | -0.13886800 | 0.27783200  |
| C | 2.19553400  | 0.98542600  | 0.04140700  |
| C | 0.90427000  | 0.90599500  | 0.39106100  |
| C | 0.28669600  | -0.37352100 | 0.94781000  |
| N | 1.34679300  | -1.39485600 | 0.79920700  |
| H | 2.60286300  | -0.70801300 | 2.25577200  |
| H | 4.11800500  | 0.32761100  | 0.72255900  |
| H | 0.22874500  | 1.74634800  | 0.25833500  |
| H | -0.02504100 | -0.25001500 | 1.99214700  |
| C | -0.79323700 | -0.84288600 | 0.01782900  |
| C | 2.68555000  | 2.20949600  | -0.53185000 |
| N | 3.11405400  | 3.18616900  | -0.98285200 |
| C | -2.13866100 | -0.27667100 | -0.00313400 |
| C | -3.09195700 | -0.71706900 | -0.93517000 |
| C | -2.50228000 | 0.73856600  | 0.89393900  |
| C | -4.36210300 | -0.16181100 | -0.96545700 |
| H | -2.83188700 | -1.49841000 | -1.64200900 |
| C | -3.77741900 | 1.29243800  | 0.86332400  |
| H | -1.78708900 | 1.10040500  | 1.62691700  |
| C | -4.71140200 | 0.84549200  | -0.06564800 |
| H | -5.08500400 | -0.51425600 | -1.69370700 |
| H | -4.03928200 | 2.07586000  | 1.56660100  |
| H | -5.70574200 | 1.27832700  | -0.09130300 |
| C | -0.26437400 | -1.85659600 | -0.72823700 |
| H | -0.74844000 | -2.40591100 | -1.52360900 |
| C | 1.04260600  | -2.14983000 | -0.24027000 |
| H | 1.75839500  | -2.87392200 | -0.60121700 |
| O | 3.51465400  | -0.67123600 | -1.00320300 |
| H | 4.09483000  | -1.42622700 | -0.83586300 |

**INT-H**

|   |             |             |            |
|---|-------------|-------------|------------|
| C | -2.67457200 | -1.10997400 | 0.84562600 |
|---|-------------|-------------|------------|

|   |             |             |             |
|---|-------------|-------------|-------------|
| C | -3.16351200 | 0.09455100  | 0.48157100  |
| C | -2.27299500 | 0.98894700  | -0.25332000 |
| C | -1.10434900 | 0.56487200  | -0.77541500 |
| C | -0.78692500 | -0.90027400 | -0.75089100 |
| N | -1.45845700 | -1.53550700 | 0.39009900  |
| H | -3.18776700 | -1.77882000 | 1.52973800  |
| H | -4.13125100 | 0.43576300  | 0.81859400  |
| H | -0.40892700 | 1.25043600  | -1.24686100 |
| H | -1.12821800 | -1.38887900 | -1.67976100 |
| C | 0.70928200  | -1.33915300 | -0.60612300 |
| C | -2.63016600 | 2.38235500  | -0.34138900 |
| N | -2.93659300 | 3.49623200  | -0.40895600 |
| C | 1.61904300  | -0.22630900 | -0.09029400 |
| C | 1.63082600  | 0.10802900  | 1.26610500  |
| C | 2.39942600  | 0.51636600  | -0.97859500 |
| C | 2.41988600  | 1.15665500  | 1.72693400  |
| H | 1.02000000  | -0.46020600 | 1.96120600  |
| C | 3.19311600  | 1.56338600  | -0.51558100 |
| H | 2.37172600  | 0.27739300  | -2.03668000 |
| C | 3.20714600  | 1.88482400  | 0.83799100  |
| H | 2.41970000  | 1.40616300  | 2.78308800  |
| H | 3.79762300  | 2.13041900  | -1.21627200 |
| H | 3.82386100  | 2.70143300  | 1.19876300  |
| C | 0.58975000  | -2.49189500 | 0.37733300  |
| H | 1.42042000  | -3.12407200 | 0.65937600  |
| C | -0.63477500 | -2.52365700 | 0.91170100  |
| H | -1.02583800 | -3.18232600 | 1.67862500  |
| O | 1.09624200  | -1.74644300 | -1.90840700 |
| H | 2.01698800  | -2.03317300 | -1.86447700 |

**INT-I**

|   |             |             |             |
|---|-------------|-------------|-------------|
| C | -2.68958700 | -1.59583200 | -0.63318300 |
| C | -3.37552400 | -0.44345600 | -0.78778200 |
| C | -2.74032700 | 0.79163500  | -0.32999700 |
| C | -1.43425100 | 0.84340700  | -0.00219800 |
| C | -0.57748800 | -0.35118800 | -0.28911500 |
| N | -1.38440600 | -1.57560100 | -0.22722500 |
| H | -3.12972200 | -2.57641900 | -0.78493200 |
| H | -4.40300500 | -0.44121700 | -1.12090600 |
| H | -0.98425500 | 1.72739800  | 0.43389000  |
| H | -0.14174600 | -0.28606900 | -1.30232100 |
| C | 0.59459300  | -0.62910300 | 0.69203600  |

|   |             |             |             |
|---|-------------|-------------|-------------|
| C | -3.57173700 | 1.95365200  | -0.14220200 |
| N | -4.25153000 | 2.88047100  | -0.00754900 |
| C | 1.89424500  | -0.00906100 | 0.19964200  |
| C | 2.64776800  | -0.63345900 | -0.79789300 |
| C | 2.32789900  | 1.21382100  | 0.71306900  |
| C | 3.81477000  | -0.04527200 | -1.27317900 |
| H | 2.31441300  | -1.58716600 | -1.19814400 |
| C | 3.49780700  | 1.80212300  | 0.23748100  |
| H | 1.74192900  | 1.69890900  | 1.48653100  |
| C | 4.24390100  | 1.17505800  | -0.75521500 |
| H | 4.39285000  | -0.54211400 | -2.04575100 |
| H | 3.82460100  | 2.75374900  | 0.64439000  |
| H | 5.15597500  | 1.63300100  | -1.12383000 |
| C | 0.57795100  | -2.15118100 | 0.72993700  |
| H | 1.35282400  | -2.75070200 | 1.18751900  |
| C | -0.59743400 | -2.59957900 | 0.27038300  |
| H | -0.97991900 | -3.61363200 | 0.25613400  |
| O | 0.21993600  | -0.08774000 | 1.95229600  |
| H | 0.87260800  | -0.37730100 | 2.60177000  |

**INT-J**

|   |             |             |             |
|---|-------------|-------------|-------------|
| C | 2.57607800  | 1.68518900  | 0.52485700  |
| C | 3.16284200  | 0.45115100  | 0.61459700  |
| C | 2.64449400  | -0.71533100 | 0.05732100  |
| C | 1.20396000  | -0.80086700 | -0.36979400 |
| C | 0.58479900  | 0.58067200  | -0.37596800 |
| N | 1.49023100  | 1.73721300  | -0.49880700 |
| H | 2.99032500  | 2.64409100  | 0.78329300  |
| H | 4.10841200  | 0.38906100  | 1.14723200  |
| H | 1.12748700  | -1.22599100 | -1.38518400 |
| H | 1.90974500  | 1.68121800  | -1.44704200 |
| C | -0.67020800 | 1.04082300  | -0.21897200 |
| C | 3.36484100  | -1.93225900 | 0.09273700  |
| N | 3.95579400  | -2.93496000 | 0.08366200  |
| C | -1.90723900 | 0.24988700  | -0.08394700 |
| C | -2.84844300 | 0.57582300  | 0.89542400  |
| C | -2.16746700 | -0.81471400 | -0.95439300 |
| C | -4.01713700 | -0.16837500 | 1.02071700  |
| H | -2.64984900 | 1.39799400  | 1.57699500  |
| C | -3.33537700 | -1.55889800 | -0.82697300 |
| H | -1.45870000 | -1.04031300 | -1.74804200 |
| C | -4.26107300 | -1.23823000 | 0.16370600  |

|   |             |             |             |
|---|-------------|-------------|-------------|
| H | -4.73572600 | 0.08423600  | 1.79322900  |
| H | -3.52724600 | -2.38252700 | -1.50666300 |
| H | -5.17213000 | -1.81849800 | 0.26383700  |
| C | -0.62433500 | 2.50879300  | -0.21603900 |
| H | -1.48612800 | 3.15148600  | -0.09431100 |
| C | 0.63566200  | 2.91116900  | -0.38805300 |
| H | 1.09496600  | 3.88624100  | -0.43898600 |
| O | 0.48873000  | -1.62912500 | 0.53314700  |
| H | -0.28155400 | -1.99875800 | 0.08516400  |

**INT-K**

|   |             |             |             |
|---|-------------|-------------|-------------|
| C | -2.81465300 | -0.46283700 | -0.96197900 |
| C | -1.43521800 | -0.88345000 | -1.37644700 |
| C | -0.55111800 | -1.47467200 | -0.55764200 |
| C | -0.76761100 | -1.61437500 | 0.95806300  |
| C | -1.20815000 | -0.25092900 | 1.46613600  |
| N | -3.27544900 | 0.61398000  | -0.47572300 |
| H | -3.56018700 | -1.25216600 | -1.12080100 |
| H | -1.20658400 | -0.81440800 | -2.43769100 |
| H | -1.62596800 | -2.29232500 | 1.09392100  |
| H | -2.22268900 | -0.20791000 | 1.85260900  |
| C | -0.66434800 | 0.89662000  | 1.01497700  |
| C | 0.69582800  | -1.94120700 | -1.10550700 |
| N | 1.69269100  | -2.29495600 | -1.57518900 |
| C | 0.73090000  | 0.98367000  | 0.51924200  |
| C | 1.02116000  | 1.61310700  | -0.69974600 |
| C | 1.77951000  | 0.41473800  | 1.24989700  |
| C | 2.31964900  | 1.63406400  | -1.19132500 |
| H | 0.21207800  | 2.05448700  | -1.27415600 |
| C | 3.08067100  | 0.44184200  | 0.75966100  |
| H | 1.56168500  | -0.05051600 | 2.20381100  |
| C | 3.35248200  | 1.04420200  | -0.46422500 |
| H | 2.52725500  | 2.10380900  | -2.14724100 |
| H | 3.88154900  | -0.01264100 | 1.33310700  |
| H | 4.36564400  | 1.05536300  | -0.85227500 |
| C | -1.55319700 | 2.01248400  | 0.66113300  |
| H | -1.26526800 | 3.04073500  | 0.86111100  |
| C | -2.62194000 | 1.80562000  | -0.13492500 |
| H | -3.17848800 | 2.67154300  | -0.48874700 |
| O | 0.39064600  | -2.20238700 | 1.50571900  |
| H | 0.28132200  | -2.22330800 | 2.46309700  |

**INT-L**

|   |             |             |             |
|---|-------------|-------------|-------------|
| C | 2.81619500  | 1.56139400  | 0.06599700  |
| C | 3.33730200  | 0.30201000  | -0.20186400 |
| C | 2.52296500  | -0.81724300 | -0.27010100 |
| C | 1.12856800  | -0.77778400 | 0.27606300  |
| C | 0.62036500  | 0.61336100  | 0.10254000  |
| N | 1.45936100  | 1.65404300  | 0.13321200  |
| H | 3.38155800  | 2.47987100  | 0.10211500  |
| H | 4.39550800  | 0.21148100  | -0.42142800 |
| H | 0.46997800  | -1.47928900 | -0.24301700 |
| H | 1.05597500  | 3.49023900  | -0.80031500 |
| C | -0.74846400 | 1.11140700  | -0.00499800 |
| C | 3.03873300  | -2.06221000 | -0.73116500 |
| N | 3.44648400  | -3.07967500 | -1.11386700 |
| C | -1.94954200 | 0.25744800  | -0.05251200 |
| C | -2.05935800 | -0.87477700 | 0.76438100  |
| C | -3.00740700 | 0.59640100  | -0.90300000 |
| C | -3.21465700 | -1.64926700 | 0.72474600  |
| H | -1.24803200 | -1.13231300 | 1.43972700  |
| C | -4.15952000 | -0.18028600 | -0.93661500 |
| H | -2.90961400 | 1.46163400  | -1.55218200 |
| C | -4.26447700 | -1.30621200 | -0.12317000 |
| H | -3.29395400 | -2.52364800 | 1.36227200  |
| H | -4.97151000 | 0.08728600  | -1.60485300 |
| H | -5.16118700 | -1.91657800 | -0.15332300 |
| C | -0.71021100 | 2.46011400  | -0.03022900 |
| H | -1.55572200 | 3.13358300  | -0.03353800 |
| C | 0.71126900  | 2.91953100  | 0.06692800  |
| H | 0.90801500  | 3.50570800  | 0.97119500  |
| O | 1.05360500  | -1.18726700 | 1.65052300  |
| H | 1.78866600  | -0.76373400 | 2.11173900  |

**INT-M**

|   |            |             |             |
|---|------------|-------------|-------------|
| C | 2.82879300 | 1.59177600  | 0.17841600  |
| C | 3.31295800 | 0.32694200  | -0.36345200 |
| C | 2.48781100 | -0.73512300 | -0.34698200 |
| C | 1.12566500 | -0.62895900 | 0.31200200  |
| C | 0.65461400 | 0.81256200  | 0.30577100  |
| N | 1.59903600 | 1.82727100  | 0.47509500  |
| H | 3.54536900 | 2.39625200  | 0.33789700  |
| H | 4.32521200 | 0.25590200  | -0.74684200 |

|   |             |             |             |
|---|-------------|-------------|-------------|
| H | 0.40746900  | -1.25376600 | -0.22229500 |
| H | 0.46916200  | 3.44452900  | -0.98501600 |
| C | -0.66151500 | 1.15392000  | 0.16571300  |
| C | 2.90501100  | -2.02358400 | -0.81878700 |
| N | 3.22209500  | -3.06803700 | -1.20500800 |
| C | -1.74732400 | 0.14649000  | 0.05708100  |
| C | -1.82749100 | -0.96654900 | 0.90590900  |
| C | -2.75752500 | 0.34095700  | -0.89693400 |
| C | -2.87838000 | -1.87075300 | 0.78210400  |
| H | -1.06963700 | -1.11229300 | 1.66875000  |
| C | -3.80053900 | -0.56775300 | -1.02202900 |
| H | -2.70584300 | 1.20567800  | -1.55226800 |
| C | -3.86344700 | -1.67766800 | -0.18156100 |
| H | -2.92788000 | -2.72626800 | 1.44767800  |
| H | -4.56540300 | -0.41033600 | -1.77549800 |
| H | -4.68068100 | -2.38546700 | -0.27518800 |
| C | -1.12030700 | 2.55183600  | 0.09398000  |
| H | -2.10303600 | 2.72525300  | 0.52892100  |
| C | -0.48452800 | 3.57129900  | -0.48863600 |
| H | -0.92253300 | 4.56421200  | -0.48714400 |
| O | 1.20591300  | -1.19236700 | 1.61638000  |
| H | 1.78981000  | -0.63177000 | 2.14378600  |

**INT-N**

|   |             |             |             |
|---|-------------|-------------|-------------|
| C | 1.24119000  | 2.04181200  | -2.51799600 |
| C | 1.78390700  | 2.84978200  | -1.30905700 |
| B | 0.05758100  | 1.55812400  | -0.66115700 |
| O | 0.18245200  | 1.23951200  | -1.99219900 |
| O | 0.95150800  | 2.48321600  | -0.21384000 |
| C | -1.68979900 | -0.01699500 | -0.06894500 |
| H | 0.83946200  | 2.68528000  | -3.30568400 |
| H | 1.71454300  | 3.92928100  | -1.46739600 |
| H | 2.81878300  | 2.59180500  | -1.06929800 |
| H | 2.00449300  | 1.39059700  | -2.95365600 |
| O | -0.91452500 | 1.08151500  | 0.17275300  |
| C | -3.11634500 | 0.20634100  | 0.27226900  |
| C | -3.96012400 | -0.85645700 | 0.61388300  |
| C | -3.63414600 | 1.50478900  | 0.26368800  |
| C | -5.29852800 | -0.62902900 | 0.90697200  |
| H | -3.56155000 | -1.86398400 | 0.67808200  |
| C | -4.97413500 | 1.73078000  | 0.56004700  |
| H | -2.97876100 | 2.33474100  | 0.02511100  |

|   |             |             |             |   |             |             |             |
|---|-------------|-------------|-------------|---|-------------|-------------|-------------|
| C | -5.81176100 | 0.66587900  | 0.87766100  | H | 3.29883000  | 2.39881600  | 0.78331400  |
| H | -5.93857600 | -1.46333000 | 1.17489100  | H | 4.91340900  | 0.86586500  | -0.40150900 |
| H | -5.36351100 | 2.74358800  | 0.54424800  | H | 1.55064700  | -1.64750900 | -1.48027000 |
| H | -6.85607700 | 0.84427200  | 1.11244800  | H | 0.76755200  | 0.97214600  | -1.71167300 |
| C | -1.21650400 | -1.19068500 | -0.50982900 | C | -0.35052800 | 0.05127400  | -0.14326700 |
| H | -1.93946300 | -1.97303400 | -0.70802900 | C | 4.19284600  | -1.58368600 | -1.35979700 |
| C | 0.18778600  | -1.57926400 | -0.88983700 | N | 4.93351500  | -2.41923700 | -1.66409800 |
| H | 0.35294100  | -1.28216100 | -1.93357600 | H | -5.08068400 | -1.49525200 | -1.48153500 |
| N | 0.31890200  | -3.02422700 | -0.83901800 | H | -5.07101000 | -0.72802400 | 0.78828200  |
| C | 0.18036800  | -3.59445800 | 0.49343400  | H | -5.02724800 | 0.97697400  | 0.28468400  |
| H | -0.72790400 | -3.21534100 | 0.97047100  | H | -5.55122300 | 0.16437600  | -1.90902800 |
| H | 0.09198200  | -4.68083500 | 0.40583000  | O | -1.29414700 | 0.01208500  | -1.20914800 |
| H | 1.03873000  | -3.37084600 | 1.14799300  | C | -0.30335500 | -1.28970600 | 0.58525400  |
| C | 1.52212900  | -3.51413200 | -1.48959800 | C | 0.39747100  | -1.39459800 | 1.78925800  |
| H | 2.44618000  | -3.25760400 | -0.94499900 | C | -0.88398200 | -2.43381100 | 0.03738200  |
| H | 1.46552600  | -4.60337200 | -1.56716300 | C | 0.50326100  | -2.61837100 | 2.44055400  |
| H | 1.58814000  | -3.10520300 | -2.50256400 | H | 0.87028000  | -0.51478100 | 2.21718600  |
| C | 2.41795900  | -0.52684300 | -0.77686600 | C | -0.78159000 | -3.65833800 | 0.69350300  |
| C | 3.46729000  | 0.02337900  | -0.11413300 | H | -1.40305400 | -2.37354300 | -0.91428900 |
| C | 3.38510800  | 0.27921500  | 1.28691200  | C | -0.09045900 | -3.75447300 | 1.89648800  |
| C | 2.17369600  | -0.10290800 | 1.94174500  | H | 1.05176100  | -2.68414800 | 3.37462300  |
| C | 1.15143800  | -0.65898300 | 1.24456700  | H | -1.23924700 | -4.54017300 | 0.25655600  |
| N | 1.22815300  | -0.84796600 | -0.13215900 | H | -0.00858300 | -4.70971800 | 2.40458200  |
| H | 2.44178300  | -0.74290400 | -1.83854000 | C | -0.56449700 | 1.20383900  | 0.79724000  |
| H | 4.37202400  | 0.26333700  | -0.66115700 | H | -1.46921600 | 1.30345000  | 1.38078500  |
| H | 2.05812800  | 0.05609500  | 3.00690300  | C | 0.68646000  | 2.00569000  | 1.02255200  |
| H | 0.21005000  | -0.93800000 | 1.70018200  | H | 0.99298700  | 1.97086500  | 2.08176600  |
| C | 4.45931500  | 0.87062500  | 1.98858800  | N | 0.63502200  | 3.43196300  | 0.68551500  |
| N | 5.34817900  | 1.36018900  | 2.55931300  | C | 0.27740800  | 3.66984600  | -0.70588000 |

## INT-O

|   |             |             |             |
|---|-------------|-------------|-------------|
| C | -4.80432100 | -0.43965000 | -1.38865700 |
| C | -4.62131800 | -0.02087600 | 0.08790300  |
| B | -2.62721100 | -0.06567400 | -0.96480800 |
| O | -3.52634400 | -0.24058700 | -1.98445100 |
| O | -3.20818400 | 0.00625700  | 0.28049000  |
| C | 2.98742900  | 1.52516800  | 0.21837500  |
| C | 3.84716000  | 0.69496100  | -0.40928800 |
| C | 3.28841600  | -0.52620600 | -0.98365800 |
| C | 1.95976100  | -0.71315100 | -1.11119000 |
| C | 1.02489600  | 0.41803200  | -0.78914700 |
| N | 1.64143800  | 1.29025600  | 0.20190500  |

## INT-P

|   |            |             |             |
|---|------------|-------------|-------------|
| C | 4.77750900 | -0.58917600 | -1.18666400 |
| C | 4.58899100 | -0.49825900 | 0.34470200  |
| B | 2.59403700 | -0.75753200 | -0.67328300 |
| O | 3.49351500 | -0.94046800 | -1.69169700 |

|              |             |             |             |              |             |             |             |
|--------------|-------------|-------------|-------------|--------------|-------------|-------------|-------------|
| O            | 3.17634800  | -0.42816200 | 0.52892200  | H            | 3.17173100  | -1.79011400 | -1.55261600 |
| C            | -2.95686800 | -2.07781000 | 0.90819300  | H            | 4.16821700  | 0.36214100  | -0.73060800 |
| C            | -3.84904100 | -1.48623500 | 0.08534100  | H            | 0.42435500  | 1.21206300  | 1.28693200  |
| C            | -3.36125100 | -0.41278100 | -0.77638300 | H            | 1.10238300  | -1.45275100 | 1.62912500  |
| C            | -2.04521500 | -0.17125700 | -0.94427400 | C            | -0.75285600 | -1.33261800 | 0.55436700  |
| C            | -1.05046200 | -1.13403600 | -0.36833400 | C            | 2.70365400  | 2.31210000  | 0.46415600  |
| N            | -1.62377700 | -1.79660600 | 0.80883900  | N            | 3.04723100  | 3.41174100  | 0.57260400  |
| H            | -3.24107000 | -2.76509400 | 1.69933600  | O            | -1.26742400 | -1.77008300 | 1.79585600  |
| H            | -4.90388800 | -1.71136100 | 0.14124500  | C            | -1.63383600 | -0.18730700 | 0.07615900  |
| H            | -1.69144300 | 0.67840200  | -1.51795100 | C            | -1.39782100 | 0.38489700  | -1.17744400 |
| H            | -0.77795600 | -1.90417600 | -1.11041200 | C            | -2.64633400 | 0.32782800  | 0.88281300  |
| C            | 0.32416500  | -0.57747700 | 0.14372200  | C            | -2.16685300 | 1.45519000  | -1.61833600 |
| C            | -4.33044800 | 0.45958100  | -1.39015100 | H            | -0.60629600 | -0.01257500 | -1.80799900 |
| N            | -5.12265700 | 1.14637800  | -1.87995100 | C            | -3.42005600 | 1.39793500  | 0.43597200  |
| H            | 5.08033700  | 0.37101600  | -1.61781000 | H            | -2.82600300 | -0.11553500 | 1.85464400  |
| H            | 5.05771200  | 0.38838400  | 0.77757200  | C            | -3.18334300 | 1.96377500  | -0.81190600 |
| H            | 4.97169100  | -1.38616300 | 0.85897000  | H            | -1.97348600 | 1.89309600  | -2.59236700 |
| H            | 5.50753300  | -1.34837400 | -1.47736700 | H            | -4.21002100 | 1.78907000  | 1.06932400  |
| O            | 1.25968800  | -0.89039200 | -0.88265200 | H            | -3.78547900 | 2.79845700  | -1.15618500 |
| C            | 0.29962200  | 0.92896600  | 0.39334800  | C            | -0.64818900 | -2.44314600 | -0.47784700 |
| C            | -0.34455900 | 1.43396700  | 1.52440200  | H            | -1.49790800 | -3.03318300 | -0.79054700 |
| C            | 0.83867100  | 1.82166300  | -0.53494500 | C            | 0.57925300  | -2.47683600 | -1.00901000 |
| C            | -0.43274200 | 2.80622800  | 1.73290300  | H            | 0.95759600  | -3.10734400 | -1.80550800 |
| H            | -0.77151300 | 0.74537600  | 2.24731300  | H            | -0.83459100 | -2.60519600 | 2.00775100  |
| C            | 0.75419900  | 3.19546100  | -0.32268300 |              |             |             |             |
| H            | 1.31507600  | 1.44245900  | -1.43378100 |              |             |             |             |
| C            | 0.12060200  | 3.69193200  | 0.81177400  | <b>INT-R</b> |             |             |             |
| H            | -0.93404900 | 3.18420500  | 2.61820400  |              |             |             |             |
| H            | 1.18127200  | 3.87844700  | -1.05015200 | C            | -2.21197600 | -2.84319600 | -0.20208700 |
| H            | 0.05347100  | 4.76248400  | 0.97581200  | C            | -3.44432000 | -2.21305500 | -0.05643800 |
| C            | 0.51685700  | -1.38170100 | 1.41753900  | C            | -3.42378200 | -0.82390400 | 0.11889000  |
| H            | 1.42346500  | -1.33945000 | 2.00208500  | C            | -2.21582300 | -0.14256700 | 0.12794200  |
| C            | -0.61924800 | -2.00618700 | 1.74350900  | C            | -1.01630300 | -0.86998300 | -0.05123400 |
| H            | -0.83689300 | -2.60200000 | 2.62254600  | N            | -1.04272700 | -2.21746300 | -0.20380100 |
|              |             |             |             | H            | -2.17237000 | -3.92350000 | -0.32835700 |
|              |             |             |             | H            | -4.37384400 | -2.76770700 | -0.06988600 |
| <b>INT-Q</b> |             |             |             | H            | -2.19697800 | 0.92866900  | 0.28603500  |
|              |             |             |             | C            | 0.27901800  | -0.21948300 | -0.04311400 |
| C            | 2.66505200  | -1.13248600 | -0.85271200 | C            | -4.65732800 | -0.09947100 | 0.30046200  |
| C            | 3.18288700  | 0.03944300  | -0.42784900 | N            | -5.65011300 | 0.47692100  | 0.44344500  |
| C            | 2.30463700  | 0.93472700  | 0.32246600  | C            | 0.35997800  | 1.26026800  | -0.05270600 |
| C            | 1.11374100  | 0.52669600  | 0.80596800  | C            | 1.04886100  | 1.94617600  | 0.95750100  |
| C            | 0.75929900  | -0.92677700 | 0.71700500  | C            | -0.24104000 | 2.01080700  | -1.07308200 |
| N            | 1.42326800  | -1.53145400 | -0.44140500 | C            | 1.13344200  | 3.33467700  | 0.94863700  |

|   |             |             |             |
|---|-------------|-------------|-------------|
| H | 1.50756600  | 1.37459500  | 1.75962200  |
| C | -0.15895900 | 3.39914500  | -1.08140000 |
| H | -0.77121700 | 1.49123300  | -1.86660300 |
| C | 0.52959300  | 4.06639300  | -0.07081300 |
| H | 1.66303300  | 3.84716300  | 1.74574900  |
| H | -0.63092200 | 3.96054700  | -1.88157700 |
| H | 0.59212800  | 5.14972200  | -0.07639700 |
| C | 1.44214000  | -1.01099600 | -0.01047500 |
| H | 1.27855700  | -2.07947600 | 0.07660600  |
| C | 2.72757500  | -0.52385900 | -0.12188800 |
| H | 2.90162600  | 0.54177200  | -0.24074100 |
| N | 3.85531500  | -1.28370300 | -0.13637000 |
| C | 3.76496000  | -2.71199000 | 0.08308500  |
| H | 3.06757200  | -3.15739300 | -0.63118600 |
| H | 4.74908400  | -3.15841600 | -0.06670600 |
| H | 3.41762700  | -2.94639300 | 1.09882600  |
| C | 5.14591600  | -0.66089000 | 0.07638200  |
| H | 5.10145500  | 0.38249600  | -0.24060400 |
| H | 5.44837800  | -0.69137300 | 1.13217900  |
| H | 5.90926100  | -1.17064300 | -0.51786200 |

**INT-S**

|   |             |             |             |
|---|-------------|-------------|-------------|
| C | 2.66949700  | 0.63095500  | 0.61244600  |
| C | 2.62516000  | 1.96262300  | 0.34974200  |
| C | 1.41357700  | 2.56398200  | -0.12405800 |
| C | 0.24785800  | 1.76630000  | -0.18937400 |
| C | 0.32293700  | 0.43370000  | 0.11279900  |
| N | 1.55808500  | -0.15524700 | 0.39834200  |
| H | 3.54897900  | 0.13142700  | 0.99932800  |
| H | 3.50531800  | 2.57102700  | 0.51531600  |
| H | -0.70828600 | 2.20429500  | -0.45167200 |
| C | -0.68673200 | -0.60010800 | 0.27068500  |
| C | 1.36892200  | 3.94479900  | -0.44830600 |
| N | 1.33622500  | 5.07621900  | -0.71303000 |
| C | -2.13743900 | -0.38698800 | 0.11397900  |
| C | -2.76558200 | 0.73166500  | 0.67357000  |
| C | -2.91010100 | -1.32459600 | -0.57859400 |
| C | -4.13815300 | 0.90913700  | 0.53670000  |
| H | -2.17795600 | 1.44786500  | 1.23978800  |
| C | -4.28254500 | -1.14652800 | -0.71209100 |
| H | -2.41990100 | -2.18267600 | -1.02886400 |
| C | -4.89917400 | -0.02770100 | -0.15743500 |

|   |             |             |             |
|---|-------------|-------------|-------------|
| H | -4.61439500 | 1.77794400  | 0.97927100  |
| H | -4.87016800 | -1.87775600 | -1.25774100 |
| H | -5.96959600 | 0.11383700  | -0.26616200 |
| C | -0.07006100 | -1.75102700 | 0.60890500  |
| H | -0.57087900 | -2.67686300 | 0.85629900  |
| C | 1.43196600  | -1.59412100 | 0.60655500  |
| H | 1.89931400  | -1.86129700 | 1.57900000  |
| N | 2.05236500  | -2.37162000 | -0.47595700 |
| C | 1.81384900  | -3.79337300 | -0.26398700 |
| H | 0.74708900  | -4.01554900 | -0.32349400 |
| H | 2.31463000  | -4.35617200 | -1.05436300 |
| H | 2.19660200  | -4.15396500 | 0.70896200  |
| C | 3.48062600  | -2.11765300 | -0.58807700 |
| H | 3.90023100  | -2.79646800 | -1.33373500 |
| H | 3.66161700  | -1.09802700 | -0.93194800 |
| H | 4.02304800  | -2.27947400 | 0.36378000  |

**INT-T**

|   |             |             |             |
|---|-------------|-------------|-------------|
| C | 2.80768000  | -0.25911200 | 2.39664500  |
| C | 3.97466700  | 0.28144200  | 1.56270200  |
| B | 2.13656100  | -0.13240900 | 0.23632300  |
| O | 1.96762000  | -0.87487700 | 1.43984900  |
| O | 3.38469500  | 0.58163300  | 0.30810400  |
| C | 1.30573700  | 2.17596300  | -0.22962600 |
| C | 0.40809200  | 3.18553200  | -0.33698200 |
| C | -0.97591600 | 2.82808700  | -0.31574600 |
| C | -1.34373300 | 1.52164100  | -0.21231800 |
| C | -0.37018000 | 0.45467000  | -0.14436400 |
| N | 0.96883700  | 0.85057400  | -0.10545300 |
| H | 2.37059500  | 2.36236400  | -0.21156200 |
| H | 0.72800100  | 4.21421700  | -0.42338100 |
| H | -2.39141300 | 1.25617300  | -0.23869600 |
| C | -0.80579800 | -0.87079700 | -0.18092000 |
| C | -1.98514400 | 3.84755300  | -0.43608000 |
| N | -2.78492000 | 4.67837400  | -0.53330200 |
| H | 4.43157200  | 1.18037800  | 1.98782000  |
| H | 4.75822300  | -0.48031700 | 1.43682100  |
| H | 2.27980400  | 0.56288300  | 2.90130900  |
| H | 3.11514200  | -0.99076900 | 3.14938900  |
| C | -2.24753000 | -1.15647700 | 0.08155000  |
| C | -2.86418900 | -0.73042200 | 1.26632500  |
| C | -3.01068800 | -1.90334000 | -0.82422700 |



|   |             |             |             |   |             |             |             |
|---|-------------|-------------|-------------|---|-------------|-------------|-------------|
| C | -4.19852300 | -1.02233900 | 1.52607800  | H | -2.66423700 | -2.05657000 | 2.85951700  |
| H | -2.27728600 | -0.16920800 | 1.98864000  | H | -3.13303400 | -1.21749600 | 1.35442000  |
| C | -4.34338700 | -2.20760800 | -0.56166300 | C | 0.59109400  | 1.97410600  | 0.10000300  |
| H | -2.55170700 | -2.23634200 | -1.75164700 | C | 0.25936500  | 3.03342800  | -0.75655000 |
| C | -4.94430100 | -1.76439400 | 0.61288800  | C | 1.28397800  | 2.26616400  | 1.28205300  |
| H | -4.65332000 | -0.68028500 | 2.45060600  | C | 0.63280200  | 4.33684100  | -0.45265000 |
| H | -4.91605600 | -2.78334900 | -1.28225400 | H | -0.28961700 | 2.81774100  | -1.66824600 |
| H | -5.98451500 | -1.99658700 | 0.81702700  | C | 1.66206400  | 3.57094100  | 1.58420800  |
| C | -0.03276400 | -2.04930200 | -0.48113700 | H | 1.50921700  | 1.45663500  | 1.97100400  |
| H | -0.61274500 | -2.96688100 | -0.41244800 | C | 1.33918800  | 4.61086100  | 0.71729700  |
| C | 1.23787300  | -2.27022400 | -0.85226100 | H | 0.37746100  | 5.14275100  | -1.13370700 |
| H | 1.60618400  | -3.27511400 | -1.01647400 | H | 2.19826200  | 3.77608700  | 2.50539600  |
| N | 2.23998900  | -1.22613400 | -1.01420600 | H | 1.62924600  | 5.62947700  | 0.95402300  |
| C | 2.09273400  | -0.54479000 | -2.32778600 | C | -1.17628300 | 0.31740200  | -0.66011000 |
| H | 1.06378200  | -0.20383000 | -2.43399200 | H | -1.31133700 | -0.56878000 | -1.27797800 |
| H | 2.77468900  | 0.30940900  | -2.35390200 | C | -2.25436200 | 1.04952100  | -0.31160500 |
| H | 2.33059100  | -1.24910800 | -3.12903500 | H | -2.13142500 | 1.93625800  | 0.30793900  |
| C | 3.58777800  | -1.84643800 | -0.93427800 | N | -3.57128300 | 0.75395900  | -0.61674300 |
| H | 3.69335800  | -2.28523600 | 0.05867600  | C | -3.81220100 | -0.36057100 | -1.50698100 |
| H | 3.67153100  | -2.62327900 | -1.69861900 | H | -3.34711400 | -1.26676500 | -1.10336700 |
| H | 4.34045400  | -1.07468800 | -1.08558600 | H | -4.88818700 | -0.52801300 | -1.58906400 |

**INT-U**

|   |             |             |             |
|---|-------------|-------------|-------------|
| C | -2.44841700 | -1.95436400 | 1.79409300  |
| C | -2.48009300 | -3.29484500 | 1.03898600  |
| B | -0.63319300 | -2.13441500 | 0.50713700  |
| O | -1.10901200 | -1.49589200 | 1.61734200  |
| O | -1.42672200 | -3.17146000 | 0.07707600  |
| C | 1.42211900  | -2.81811700 | -0.62638200 |
| C | 2.74418100  | -2.65158700 | -0.79773400 |
| C | 3.31971800  | -1.35783300 | -0.46202500 |
| C | 2.52532700  | -0.30780500 | -0.12901400 |
| C | 1.08711700  | -0.45085500 | -0.13058900 |
| N | 0.60835400  | -1.79406700 | -0.15243300 |
| H | 0.91673300  | -3.76267500 | -0.79663600 |
| H | 3.37144400  | -3.45727000 | -1.15281800 |
| H | 2.95472000  | 0.67108000  | 0.04667800  |
| C | 0.19209800  | 0.58443400  | -0.22535100 |
| C | 4.74401900  | -1.18601600 | -0.52889500 |
| N | 5.89453800  | -1.06634000 | -0.58655500 |
| H | -2.26380400 | -4.14305400 | 1.69707600  |
| H | -3.42500000 | -3.47601400 | 0.52178300  |

**INT-V**

|   |             |             |             |
|---|-------------|-------------|-------------|
| C | 1.68639700  | 0.35676300  | 2.42351800  |
| C | 3.15675100  | 0.35206700  | 1.97079300  |
| B | 1.83115400  | -0.71814700 | 0.47631300  |
| O | 1.09613600  | -0.69864200 | 1.66917400  |
| O | 3.11677600  | -0.19327500 | 0.65333300  |
| C | 1.78368900  | 0.76267100  | -1.72232500 |
| C | 1.69521300  | 2.08849600  | -1.51485800 |
| C | 0.69412400  | 2.65772700  | -0.65338700 |
| C | -0.37602000 | 1.82119100  | -0.29597100 |
| C | -0.30397600 | 0.46934000  | -0.50737900 |
| N | 1.01512400  | -0.11942100 | -0.84558400 |
| H | 2.46747400  | 0.27868800  | -2.40608400 |
| H | 2.35002100  | 2.74820900  | -2.07453000 |
| H | -1.30774500 | 2.24414500  | 0.06737400  |

|   |             |             |             |
|---|-------------|-------------|-------------|
| C | -1.24584000 | -0.59494000 | -0.54604600 |
| C | 0.65742000  | 4.05310800  | -0.39997200 |
| N | 0.63844400  | 5.19444100  | -0.17832000 |
| H | 3.59102100  | 1.35450500  | 1.94237900  |
| H | 3.77583800  | -0.28837000 | 2.61076800  |
| H | 1.20134600  | 1.30736900  | 2.16468600  |
| H | 1.55896100  | 0.16237500  | 3.49107600  |
| C | -2.65784200 | -0.43823700 | -0.14599100 |
| C | -2.97477000 | 0.21569900  | 1.04941500  |
| C | -3.68699900 | -0.95612500 | -0.93657500 |
| C | -4.30161000 | 0.35358700  | 1.44204800  |
| H | -2.16903000 | 0.59126500  | 1.67375300  |
| C | -5.01328100 | -0.81367600 | -0.54339000 |
| H | -3.43963700 | -1.45245400 | -1.87034700 |
| C | -5.32325200 | -0.15764000 | 0.64555000  |
| H | -4.53786200 | 0.85936800  | 2.37265000  |
| H | -5.80663000 | -1.21009300 | -1.16894400 |
| H | -6.35866600 | -0.04480700 | 0.95031900  |
| C | -0.67920900 | -1.74537100 | -1.01684600 |
| H | -1.19414500 | -2.67246800 | -1.22548300 |
| C | 0.76135900  | -1.52846700 | -1.29072900 |
| H | 1.11451000  | -1.74004000 | -2.31075100 |
| N | 1.74602600  | -2.16119600 | -0.29807200 |
| C | 3.03071300  | -2.51652200 | -0.93695400 |
| H | 3.41593100  | -1.65159600 | -1.47785800 |
| H | 3.74900400  | -2.77653900 | -0.15929200 |
| H | 2.88436500  | -3.35940000 | -1.61819200 |
| C | 1.22102200  | -3.27843900 | 0.51110800  |
| H | 0.29630100  | -2.96052000 | 0.98802900  |
| H | 1.04720800  | -4.15125900 | -0.12479400 |
| H | 1.96217700  | -3.51646400 | 1.27540800  |

|   |             |             |             |
|---|-------------|-------------|-------------|
| H | 0.33079000  | -2.66270800 | 0.52150100  |
| C | -0.23748500 | -0.20053400 | 0.00221200  |
| C | 4.66653600  | 0.02971200  | -0.30846500 |
| N | 5.65492900  | 0.61084300  | -0.47001300 |
| C | -0.40319400 | 1.27347300  | 0.01755800  |
| C | -1.20737800 | 1.91213600  | -0.93824700 |
| C | 0.21579300  | 2.06610800  | 0.99331400  |
| C | -1.36600700 | 3.29230500  | -0.93149700 |
| H | -1.70265400 | 1.30777300  | -1.69255900 |
| C | 0.06354900  | 3.45004200  | 0.99689600  |
| H | 0.81322600  | 1.58212600  | 1.76122300  |
| C | -0.72743100 | 4.06915800  | 0.03420900  |
| H | -1.98380400 | 3.76632700  | -1.68812900 |
| H | 0.55545900  | 4.04228100  | 1.76221900  |
| H | -0.85105700 | 5.14725200  | 0.03824200  |
| C | -1.42297600 | -1.05208000 | -0.09752400 |
| H | -1.29673900 | -2.02693300 | -0.56543200 |
| C | -2.65698400 | -0.67125400 | 0.30335100  |
| H | -2.79290300 | 0.31861100  | 0.73504700  |
| N | -3.81114600 | -1.42325200 | 0.26334700  |
| C | -3.75000800 | -2.71351400 | -0.38232500 |
| H | -2.98156700 | -3.32869300 | 0.09526000  |
| H | -4.71214400 | -3.21718400 | -0.27068300 |
| H | -3.51124100 | -2.63558600 | -1.45548900 |
| C | -5.06331500 | -0.70600100 | 0.11140500  |
| H | -5.03473000 | 0.20436700  | 0.71425400  |
| H | -5.26495800 | -0.42278600 | -0.93286000 |
| H | -5.88898000 | -1.32806900 | 0.46725300  |

**INT-X**

**INT-W**

|   |            |             |             |
|---|------------|-------------|-------------|
| C | 2.36037600 | -2.80406500 | 0.25803600  |
| C | 3.52589600 | -2.14921700 | 0.08483000  |
| C | 3.45245100 | -0.71168800 | -0.10286000 |
| C | 2.26043400 | -0.05930500 | -0.10332700 |
| C | 1.00920000 | -0.76591100 | 0.06557400  |
| N | 1.15607900 | -2.15494600 | 0.24407700  |
| H | 2.30877600 | -3.87515300 | 0.41542100  |
| H | 4.47401900 | -2.66647100 | 0.08327600  |
| H | 2.22272000 | 1.01013400  | -0.26926600 |

|   |             |             |             |
|---|-------------|-------------|-------------|
| C | -3.05986900 | 1.11483600  | 1.95870600  |
| C | -3.92629600 | 0.02250900  | 1.29509300  |
| B | -1.78482700 | -0.70042500 | 1.49039300  |
| O | -1.81943500 | 0.48069900  | 2.21997000  |
| O | -3.00052000 | -0.97006300 | 0.88221700  |
| C | -0.46208800 | -4.61856800 | 0.27636000  |
| C | -0.92023700 | -3.95612000 | -1.03181700 |
| B | -0.17508300 | -2.35156700 | 0.45807000  |
| O | 0.30077300  | -3.62162100 | 0.91887200  |
| O | -0.94699400 | -2.57399800 | -0.73021500 |
| C | 2.24076400  | -2.30469300 | -0.74611000 |
| C | 3.51395600  | -1.90447000 | -0.79137300 |

|   |             |             |             |
|---|-------------|-------------|-------------|
| C | 3.89734600  | -0.66888300 | -0.10424700 |
| C | 2.92768600  | 0.23935900  | 0.21860400  |
| C | 1.55060600  | -0.12022100 | 0.00859600  |
| N | 1.34056600  | -1.57260700 | 0.13671900  |
| H | 1.82091700  | -3.16107100 | -1.25571400 |
| H | 4.25327300  | -2.43696700 | -1.37812500 |
| H | 3.18869800  | 1.24790800  | 0.52183600  |
| H | 1.69590300  | -1.76442600 | 1.08479300  |
| C | 0.57368200  | 0.77223500  | -0.34173600 |
| C | 5.28485800  | -0.34653300 | 0.04428800  |
| N | 6.41137400  | -0.09980700 | 0.15689100  |
| H | -2.89669400 | 1.96630100  | 1.28369700  |
| H | -4.47830000 | 0.39784000  | 0.42681300  |
| H | -4.63941600 | -0.41767000 | 2.00153400  |
| H | -3.49192600 | 1.49006800  | 2.89036200  |
| H | -0.21237200 | -4.15456300 | -1.85055900 |
| H | -1.91221700 | -4.28859500 | -1.35370100 |
| H | 0.14639100  | -5.51335500 | 0.10872700  |
| H | -1.32638300 | -4.89801800 | 0.89446000  |
| O | -0.69380500 | -1.47167700 | 1.45067600  |
| C | 0.84368900  | 2.22414700  | -0.09947000 |
| C | 1.45215000  | 3.02399400  | -1.06788300 |
| C | 0.43834000  | 2.78653600  | 1.11481200  |
| C | 1.66834500  | 4.37690000  | -0.81919800 |
| H | 1.75938600  | 2.57955300  | -2.01039100 |
| C | 0.65088900  | 4.14191900  | 1.35485400  |
| H | -0.04497800 | 2.15119100  | 1.85406800  |
| C | 1.26752500  | 4.93676700  | 0.39144300  |
| H | 2.15224900  | 4.99272600  | -1.57049200 |
| H | 0.33764500  | 4.57585300  | 2.29922500  |
| H | 1.43782400  | 5.99112100  | 0.58418600  |
| C | -0.67190400 | 0.40575800  | -0.93901800 |
| H | -0.80311100 | -0.62168900 | -1.25166700 |
| C | -1.67944400 | 1.30894000  | -1.13287900 |
| H | -1.53706000 | 2.35033900  | -0.84952200 |
| N | -2.89723400 | 1.02685600  | -1.63930200 |
| C | -3.19521900 | -0.30486800 | -2.14310500 |
| H | -2.83178000 | -1.06006200 | -1.44230400 |
| H | -4.27876200 | -0.40479400 | -2.24064400 |
| H | -2.73484900 | -0.46447300 | -3.12722400 |
| C | -3.79543200 | 2.09460500  | -2.02868700 |
| H | -3.50256400 | 3.02122300  | -1.53115100 |
| H | -3.78123900 | 2.26067400  | -3.11364000 |
| H | -4.82026100 | 1.84812400  | -1.73260600 |

**INT-Y**

|   |             |             |             |
|---|-------------|-------------|-------------|
| C | 2.64273200  | 0.90273800  | -0.36355900 |
| C | 2.40941000  | 2.23199600  | -0.35655500 |
| C | 1.13063700  | 2.78689500  | -0.04399900 |
| C | 0.04306500  | 1.89623100  | 0.03023900  |
| C | 0.23200300  | 0.54392600  | 0.04261200  |
| N | 1.61772500  | 0.02290700  | 0.21063600  |
| H | 3.56526300  | 0.40157200  | -0.61702000 |
| H | 3.20929000  | 2.89482000  | -0.67150300 |
| H | -0.97397000 | 2.27445900  | -0.00724300 |
| H | 1.79858000  | -0.11200600 | 1.22031100  |
| C | -0.60577400 | -0.61995800 | -0.08617300 |
| C | 0.93169300  | 4.19252000  | -0.02867600 |
| N | 0.77341400  | 5.34357500  | -0.00483700 |
| C | -2.08130300 | -0.56605300 | -0.05674300 |
| C | -2.82959400 | -1.37023800 | -0.92252700 |
| C | -2.75053600 | 0.26628200  | 0.84671100  |
| C | -4.21876700 | -1.34491000 | -0.88467100 |
| H | -2.31188800 | -1.99989100 | -1.63990700 |
| C | -4.14074900 | 0.28985800  | 0.88413600  |
| H | -2.17452500 | 0.87950000  | 1.53322900  |
| C | -4.87764300 | -0.51442000 | 0.01855900  |
| H | -4.78897000 | -1.96807700 | -1.56605500 |
| H | -4.64884000 | 0.93592600  | 1.59266800  |
| H | -5.96219900 | -0.49176400 | 0.04587400  |
| C | 0.14459500  | -1.73674500 | -0.25347900 |
| H | -0.23248100 | -2.73861500 | -0.41095200 |
| C | 1.60253600  | -1.38377600 | -0.37558300 |
| H | 1.89847300  | -1.23316000 | -1.42675300 |
| N | 2.61508700  | -2.17411400 | 0.26889300  |
| C | 3.32030900  | -3.07432700 | -0.63149000 |
| H | 3.69040600  | -2.52055000 | -1.49747300 |
| H | 4.17981700  | -3.50049300 | -0.10788900 |
| H | 2.69061000  | -3.90687900 | -0.98664900 |
| C | 2.18060300  | -2.85872700 | 1.47985700  |
| H | 1.63501200  | -2.17530900 | 2.13548200  |
| H | 1.52126500  | -3.71574300 | 1.27096600  |
| H | 3.06127000  | -3.21811900 | 2.01812500  |

**TS1**

|   |             |             |             |            |             |             |             |
|---|-------------|-------------|-------------|------------|-------------|-------------|-------------|
| C | 0.50459800  | 4.25395700  | 0.19929900  | H          | 3.67484600  | -3.15662000 | 1.66972400  |
| C | 1.72452100  | 3.71304700  | -0.56733300 | H          | 3.14106700  | -3.76744000 | 0.08616800  |
| B | 0.14102900  | 2.15152700  | -0.53418500 | H          | 3.14907500  | -0.00061700 | -0.20202300 |
| O | -0.36030100 | 3.12980200  | 0.32518500  |            |             |             |             |
| O | 1.20551500  | 2.61933900  | -1.30722000 |            |             |             |             |
| C | -0.28799000 | 0.10294400  | -1.85779600 | <b>TS2</b> |             |             |             |
| C | -1.04245700 | -0.98376700 | -2.16585700 |            |             |             |             |
| C | -2.40416200 | -1.05872700 | -1.74667600 | C          | -1.88035200 | 3.80749900  | -0.30399900 |
| C | -2.93335400 | 0.07832000  | -1.05748300 | C          | -2.29633500 | 2.93447100  | 0.89752900  |
| C | -2.13418500 | 1.13526600  | -0.76631100 | B          | -1.33690700 | 1.64879700  | -0.66054100 |
| N | -0.79565600 | 1.16776500  | -1.12687900 | O          | -1.14412200 | 2.93175500  | -1.14619900 |
| H | 0.75121100  | 0.20273800  | -2.14862200 | O          | -2.24716400 | 1.60540300  | 0.39723700  |
| H | -0.60068600 | -1.79717000 | -2.73002500 | C          | 0.36128200  | 0.59794900  | 1.63066300  |
| H | -3.97006900 | 0.09097800  | -0.74298100 | C          | 1.48366900  | -0.02694600 | 2.15338500  |
| H | -2.47764300 | 2.00383400  | -0.21836900 | C          | 2.72809400  | 0.30115700  | 1.60591700  |
| C | -1.14290300 | 0.60275200  | 2.17517600  | C          | 2.80912200  | 1.25334500  | 0.59322400  |
| C | -0.48214000 | -0.42653600 | 1.49441400  | C          | 1.62120600  | 1.82419300  | 0.14507200  |
| C | -1.12119900 | -1.65222000 | 1.29110500  | N          | 0.43306000  | 1.49864700  | 0.64684600  |
| C | -2.41847800 | -1.84531100 | 1.75402200  | H          | -0.64356100 | 0.35715900  | 1.96988900  |
| C | -3.06574700 | -0.82532300 | 2.44771500  | H          | 1.39902900  | -0.76931000 | 2.93776800  |
| C | -2.42578000 | 0.39506500  | 2.66376400  | H          | 3.75915700  | 1.50553300  | 0.13837900  |
| H | -0.64639200 | 1.56182300  | 2.28622600  | H          | 1.60793300  | 2.54558000  | -0.66814000 |
| H | -0.62627600 | -2.43221100 | 0.71972100  | C          | 1.49717900  | -0.14114000 | -2.24198100 |
| H | -2.92826500 | -2.78244500 | 1.55587200  | C          | 0.78150700  | -0.93320800 | -1.31687300 |
| H | -2.93578600 | 1.18954300  | 3.19895600  | C          | 1.48835100  | -1.95119500 | -0.64027600 |
| C | 0.87747000  | -0.15901300 | 0.95943300  | C          | 2.84341000  | -2.14870500 | -0.86334500 |
| O | 1.18107900  | 1.00482100  | 0.59894100  | C          | 3.53840600  | -1.35014100 | -1.77311900 |
| H | -4.07637300 | -0.97889700 | 2.81322800  | C          | 2.84895600  | -0.35601900 | -2.46863400 |
| C | 1.82650400  | -1.23160400 | 0.87736600  | H          | 0.96532000  | 0.64094400  | -2.77341400 |
| C | 3.00941800  | -0.99029500 | 0.22990700  | H          | 0.98107500  | -2.55565300 | 0.10579200  |
| C | -3.17387400 | -2.22484700 | -1.94907500 | H          | 3.36949800  | -2.92057800 | -0.30937900 |
| N | -3.80319800 | -3.19457400 | -2.09811800 | H          | 3.37352300  | 0.26184100  | -3.19193000 |
| H | -0.00886800 | 5.04270400  | -0.36345300 | C          | -0.61207600 | -0.65345000 | -1.04966900 |
| H | 0.76561600  | 4.64030200  | 1.18866300  | O          | -1.05117100 | 0.57494600  | -1.48027300 |
| H | 2.49519600  | 3.35611900  | 0.12873000  | H          | 4.59852900  | -1.50780900 | -1.94132600 |
| H | 2.16553900  | 4.44599200  | -1.24781500 | C          | -1.51141000 | -1.56291900 | -0.47025400 |
| H | 1.58129600  | -2.19273800 | 1.30914800  | C          | -2.84130900 | -1.29219100 | -0.24644500 |
| N | 4.02039400  | -1.84993400 | 0.06850200  | C          | 3.91690900  | -0.37487000 | 2.06057800  |
| C | 5.16991100  | -1.52979400 | -0.75818000 | N          | 4.86637300  | -0.92566100 | 2.42505000  |
| H | 5.11879700  | -0.48278200 | -1.05812600 | H          | -1.25950900 | 4.65747400  | -0.00695500 |
| H | 6.09712400  | -1.69177300 | -0.20017300 | H          | -2.75208000 | 4.18547100  | -0.85125000 |
| H | 5.18924400  | -2.15232300 | -1.65933900 | H          | -3.30172900 | 3.15568400  | 1.26436800  |
| C | 3.91962800  | -3.19530500 | 0.60414800  | H          | -1.58209700 | 3.03697400  | 1.72477400  |
| H | 4.87639300  | -3.70281000 | 0.47981200  | H          | -1.11850900 | -2.54671900 | -0.23902300 |

|   |             |             |             |
|---|-------------|-------------|-------------|
| N | -3.77183600 | -2.18770700 | 0.21033100  |
| C | -4.95658400 | -1.66572000 | 0.86178000  |
| H | -5.77970400 | -2.37801100 | 0.75853600  |
| H | -4.79360100 | -1.47137100 | 1.93215800  |
| H | -5.24638900 | -0.72796800 | 0.38375600  |
| C | -3.33992900 | -3.50211500 | 0.62631900  |
| H | -4.21605200 | -4.11107500 | 0.85701100  |
| H | -2.78775400 | -3.98571700 | -0.18411000 |
| H | -2.69118700 | -3.46642200 | 1.51560700  |
| H | -3.23146600 | -0.30374800 | -0.46073800 |

**TS4**

|   |             |             |             |
|---|-------------|-------------|-------------|
| C | 3.53778500  | -0.49051000 | 2.14772300  |
| C | 4.08192700  | -1.46833600 | 1.09301000  |
| B | 2.20160800  | -0.49735700 | 0.32566900  |
| O | 2.24062800  | -0.14461700 | 1.66439200  |
| O | 3.34139600  | -1.15388500 | -0.07952900 |
| C | 2.11738400  | -2.49433700 | -2.61547800 |
| C | 1.76147100  | -3.42352600 | -1.43625000 |
| B | 0.56607400  | -1.45638500 | -1.30952200 |
| O | 1.08502100  | -1.53137200 | -2.62976200 |
| O | 0.90849100  | -2.65635800 | -0.60399500 |
| C | -1.91487200 | -1.94723000 | -1.15494100 |
| C | -3.22631000 | -1.59998600 | -1.02326000 |
| C | -3.51469400 | -0.17919200 | -0.98121500 |
| C | -2.54786700 | 0.76176400  | -1.03972500 |
| C | -1.09631600 | 0.37925800  | -1.19556000 |
| N | -0.90348100 | -1.06355300 | -1.21507500 |
| H | -1.59146100 | -2.98436700 | -1.18015600 |
| H | -4.01737800 | -2.33358400 | -0.99349000 |
| H | -2.79551800 | 1.81572900  | -0.97241200 |
| H | -0.68527800 | 0.78662400  | -2.13215800 |
| C | -0.20816900 | 0.97027800  | -0.06994100 |
| C | -4.88419400 | 0.24544400  | -0.81974100 |
| N | -5.98579800 | 0.57039700  | -0.67652400 |
| H | 3.45312400  | -0.93497300 | 3.14188700  |
| H | 3.88749700  | -2.51049800 | 1.37096700  |
| H | 5.14993000  | -1.34222400 | 0.90322500  |
| H | 4.14879000  | 0.41710700  | 2.21474600  |
| H | 1.22950700  | -4.32258400 | -1.77551700 |
| H | 2.65215600  | -3.73551300 | -0.87911800 |
| H | 2.14349600  | -3.02447800 | -3.57323400 |

|   |             |             |             |
|---|-------------|-------------|-------------|
| H | 3.09045300  | -2.01593600 | -2.44879200 |
| O | 1.17749000  | -0.19975700 | -0.52376400 |
| C | 0.43579000  | 2.29225000  | -0.35657900 |
| C | -0.04916500 | 3.12580400  | -1.36920900 |
| C | 1.50349100  | 2.74433000  | 0.43118100  |
| C | 0.51567100  | 4.38047400  | -1.58586100 |
| H | -0.88156100 | 2.81709100  | -1.99176600 |
| C | 2.07707800  | 3.98729600  | 0.20033000  |
| H | 1.89222200  | 2.10302100  | 1.21609400  |
| C | 1.58295100  | 4.81280900  | -0.80822800 |
| H | 0.11890900  | 5.01586200  | -2.37059600 |
| H | 2.91273600  | 4.31473400  | 0.81041000  |
| H | 2.02846400  | 5.78623600  | -0.98502300 |
| C | -0.54331500 | 0.74230200  | 1.29566500  |
| H | -0.04090200 | 1.34804500  | 2.03851400  |
| C | -1.40852700 | -0.24999100 | 1.69192200  |
| H | -1.94570000 | -0.84796000 | 0.96384700  |
| N | -1.68441200 | -0.57174800 | 2.95766600  |
| C | -1.00242300 | 0.08781100  | 4.05594200  |
| H | -1.34396900 | 1.12286900  | 4.17252200  |
| H | -1.20502500 | -0.45728800 | 4.97835700  |
| H | 0.07530800  | 0.08865100  | 3.86894800  |
| C | -2.73494800 | -1.52397500 | 3.27465300  |
| H | -3.12445000 | -1.94628900 | 2.34703300  |
| H | -2.33981900 | -2.33226000 | 3.89732800  |
| H | -3.55480800 | -1.03349100 | 3.80981200  |

**TS4-iso**

|   |             |             |             |
|---|-------------|-------------|-------------|
| C | 3.14240400  | 1.65266400  | 1.87011200  |
| C | 4.15698800  | 0.62068800  | 1.34787800  |
| B | 2.16858300  | 0.29917500  | 0.33954600  |
| O | 1.89090700  | 1.20289900  | 1.35605700  |
| O | 3.52018000  | 0.05973600  | 0.20866000  |
| C | 3.15032700  | -2.66707600 | -1.33615100 |
| C | 3.10362800  | -2.99390300 | 0.16986000  |
| B | 1.21112000  | -1.85699900 | -0.48123000 |
| O | 1.81473400  | -2.35275700 | -1.66841200 |
| O | 1.95027200  | -2.32724200 | 0.65539900  |
| C | -0.88958800 | -2.83043500 | 0.55173300  |
| C | -2.23351200 | -2.86967100 | 0.76743600  |
| C | -3.04572200 | -2.07698000 | -0.12891600 |
| C | -2.51137000 | -1.24648700 | -1.05186500 |

|   |             |             |             |   |             |             |             |
|---|-------------|-------------|-------------|---|-------------|-------------|-------------|
| C | -1.01832500 | -1.04262100 | -1.12551800 | C | 4.74998400  | 0.90520300  | -0.87074600 |
| N | -0.29645500 | -2.06218200 | -0.38438400 | C | 4.95723100  | -0.55880800 | -0.42967100 |
| H | -0.19155500 | -3.43679800 | 1.12206600  | B | 2.74437200  | -0.05967700 | -0.43368100 |
| H | -2.68036400 | -3.53131600 | 1.49364700  | O | 3.37923700  | 1.16395200  | -0.61238600 |
| H | -3.15187200 | -0.69412200 | -1.73015600 | O | 3.64996800  | -1.10988300 | -0.39771000 |
| H | -0.66321600 | -1.05905000 | -2.16505900 | C | 1.62763500  | -3.42176500 | -1.18814800 |
| C | -0.62010600 | 0.34079700  | -0.54461700 | C | 1.62810000  | -3.34805500 | 0.35034900  |
| C | -4.48232300 | -2.19467500 | -0.05673200 | B | 0.67374200  | -1.40291700 | -0.49356500 |
| N | -5.63379300 | -2.28289200 | 0.02199700  | O | 1.16516000  | -2.16898600 | -1.61844400 |
| H | 3.09839700  | 1.69674600  | 2.96098700  | O | 0.69514200  | -2.32921400 | 0.65318500  |
| H | 4.34006100  | -0.17069400 | 2.08413200  | C | -1.69922700 | -1.88292400 | -1.10641600 |
| H | 5.11140100  | 1.06738100  | 1.05962900  | C | -3.00404200 | -1.65605700 | -1.41119500 |
| H | 3.34984500  | 2.65777700  | 1.48354500  | C | -3.42736000 | -0.26654400 | -1.45079600 |
| H | 3.00277300  | -4.07336100 | 0.34489700  | C | -2.56501000 | 0.74533800  | -1.22442500 |
| H | 3.99585400  | -2.63453000 | 0.69541700  | C | -1.12010800 | 0.49480800  | -0.84871100 |
| H | 3.49352500  | -3.51466900 | -1.93865900 | N | -0.81681100 | -0.93399800 | -0.71163000 |
| H | 3.81010700  | -1.80933900 | -1.52329700 | H | -1.28755700 | -2.88922400 | -1.09960300 |
| O | 1.22953100  | -0.25317400 | -0.47142300 | H | -3.67302200 | -2.45014000 | -1.70808900 |
| C | -0.50184900 | 1.48369200  | -1.48899500 | H | -2.88570000 | 1.77998900  | -1.29057500 |
| C | -1.22683200 | 1.48659700  | -2.68555700 | H | -0.45249100 | 0.95410100  | -1.59065600 |
| C | 0.33000400  | 2.57485000  | -1.20092400 | C | -0.89545300 | 1.24498400  | 0.46868800  |
| C | -1.14536800 | 2.56682900  | -3.55878600 | C | -4.80243000 | 0.03919600  | -1.76030700 |
| H | -1.86627300 | 0.64932100  | -2.94238800 | N | -5.91208300 | 0.26736300  | -1.99722000 |
| C | 0.42025800  | 3.64549000  | -2.08216900 | H | 5.37569400  | 1.60699700  | -0.31260300 |
| H | 0.91927700  | 2.56093300  | -0.28879200 | H | 5.40309700  | -0.62089700 | 0.57038600  |
| C | -0.32170900 | 3.64750100  | -3.26121800 | H | 5.58383300  | -1.12401100 | -1.12462800 |
| H | -1.72183700 | 2.55663400  | -4.47771900 | H | 4.94923500  | 1.03604200  | -1.94084400 |
| H | 1.07853800  | 4.47702600  | -1.85187400 | H | 1.31840300  | -4.29260000 | 0.81726000  |
| H | -0.25062300 | 4.48366800  | -3.94911200 | H | 2.62496800  | -3.08237400 | 0.72246400  |
| C | -0.99883700 | 0.54499200  | 0.80428800  | H | 0.95719000  | -4.22061900 | -1.54516900 |
| H | -1.11812900 | -0.35130200 | 1.40417300  | H | 2.63167100  | -3.62040700 | -1.58115300 |
| C | -1.24513000 | 1.77683000  | 1.35605200  | O | 1.41827800  | -0.15245400 | -0.29674600 |
| H | -1.24460600 | 2.66804800  | 0.73417700  | C | -0.41661300 | 2.63871000  | 0.41783000  |
| N | -1.52639000 | 1.98840600  | 2.64421800  | C | -1.05515800 | 3.62699100  | 1.17775300  |
| C | -1.49103100 | 0.88172800  | 3.58671900  | C | 0.68658500  | 2.98230800  | -0.37444700 |
| H | -0.53281700 | 0.36131400  | 3.50166300  | C | -0.60219300 | 4.94080200  | 1.14481200  |
| H | -1.59947300 | 1.27455200  | 4.59787400  | H | -1.92362700 | 3.35962000  | 1.77309800  |
| H | -2.29904400 | 0.16742700  | 3.39123300  | C | 1.14621200  | 4.29411100  | -0.38744800 |
| C | -1.98941400 | 3.27640400  | 3.12476600  | H | 1.21481200  | 2.21296500  | -0.92700000 |
| H | -1.89702700 | 4.01608200  | 2.32864700  | C | 0.50156500  | 5.27491900  | 0.36318700  |
| H | -3.03863600 | 3.22528400  | 3.43564400  | H | -1.11193600 | 5.70326500  | 1.72463600  |
| H | -1.38630400 | 3.59979500  | 3.97829100  | H | 2.01791000  | 4.54573800  | -0.98226000 |
|   |             |             |             | H | 0.85912000  | 6.29942800  | 0.34050300  |
|   |             |             |             | C | -1.16923300 | 0.64094400  | 1.64318700  |

TS5

|   |             |             |            |
|---|-------------|-------------|------------|
| H | -0.89241000 | 1.11832000  | 2.57723900 |
| C | -1.70697600 | -0.70056400 | 1.65371200 |
| H | -2.51823900 | -0.96561400 | 0.97904600 |
| N | -1.36443500 | -1.62573400 | 2.49827400 |
| C | -0.21914200 | -1.48270700 | 3.39641800 |
| H | 0.67575800  | -1.70561200 | 2.80739000 |
| H | -0.17239400 | -0.47197700 | 3.79713500 |
| H | -0.33435100 | -2.19091600 | 4.21718600 |
| C | -1.84746700 | -2.99180400 | 2.31629000 |
| H | -2.66982500 | -2.99125400 | 1.60005800 |
| H | -1.01589100 | -3.57373400 | 1.90905500 |
| H | -2.17519000 | -3.39936200 | 3.27468400 |

**TS5-iso**

|   |             |             |             |
|---|-------------|-------------|-------------|
| C | -5.97854900 | 0.09287600  | 1.04045300  |
| C | -5.43096500 | 1.36511900  | 0.36234600  |
| B | -3.74541900 | -0.10973000 | 0.72438400  |
| O | -4.82337300 | -0.63380500 | 1.41985300  |
| O | -4.10240600 | 1.02541800  | -0.00128600 |
| C | -1.79833900 | 1.19703800  | -1.89989800 |
| C | -1.39663400 | 2.14802100  | -0.74498000 |
| B | -1.39307900 | -0.06851300 | 0.04790000  |
| O | -1.60330500 | -0.10884300 | -1.41801800 |
| O | -1.11025300 | 1.32432800  | 0.35616500  |
| C | -0.27995400 | -2.22951900 | 0.77903000  |
| C | 0.70294700  | -3.03114900 | 1.28099000  |
| C | 1.98370300  | -2.40002300 | 1.52700400  |
| C | 2.19290300  | -1.09044700 | 1.28048900  |
| C | 1.08014600  | -0.19566700 | 0.77706200  |
| N | -0.14057900 | -0.92711900 | 0.45489700  |
| H | -1.28391300 | -2.61147500 | 0.61554700  |
| H | 0.52387000  | -4.06207300 | 1.54736200  |
| H | 3.15493500  | -0.62711100 | 1.47670400  |
| H | 0.85265600  | 0.54780800  | 1.55514600  |
| C | 1.61282400  | 0.64371900  | -0.39098500 |
| C | 3.08658900  | -3.20515900 | 1.99289500  |
| N | 3.96961900  | -3.87009100 | 2.33696700  |
| H | -6.58968000 | 0.31376000  | 1.91992200  |
| H | -5.41282800 | 2.21602600  | 1.05409000  |
| H | -6.00228000 | 1.65160100  | -0.52521500 |
| H | -6.57732900 | -0.50834600 | 0.34495700  |
| H | -0.50640500 | 2.74283100  | -1.00340300 |

|   |             |             |             |
|---|-------------|-------------|-------------|
| H | -2.21594600 | 2.83503400  | -0.50569300 |
| H | -1.16962100 | 1.36953800  | -2.79309900 |
| H | -2.84347600 | 1.34693600  | -2.19127000 |
| O | -2.52615900 | -0.64872200 | 0.75724200  |
| C | 2.32516200  | 1.88692600  | -0.00597300 |
| C | 3.60206300  | 2.15696500  | -0.50983800 |
| C | 1.71427100  | 2.80656100  | 0.85765300  |
| C | 4.26673900  | 3.32489800  | -0.15109500 |
| H | 4.07738500  | 1.43412200  | -1.16723800 |
| C | 2.37865600  | 3.97944700  | 1.20013800  |
| H | 0.70658700  | 2.60734900  | 1.21362800  |
| C | 3.65468100  | 4.23795500  | 0.70389500  |
| H | 5.26289100  | 3.51929700  | -0.53483700 |
| H | 1.89592100  | 4.69594500  | 1.85653700  |
| H | 4.17174200  | 5.15024600  | 0.98312900  |
| C | 1.48078600  | 0.37074400  | -1.70672500 |
| H | 1.76906500  | 1.14305700  | -2.41728800 |
| C | 0.71926700  | -0.71652700 | -2.30186300 |
| H | -0.13242800 | -0.45035200 | -2.91699300 |
| N | 0.98281300  | -1.98004700 | -2.23868200 |
| C | 2.20913500  | -2.55040000 | -1.68032700 |
| H | 2.72120500  | -3.07766300 | -2.49013100 |
| H | 2.83714400  | -1.75724700 | -1.28385700 |
| H | 1.94499700  | -3.24754900 | -0.88558100 |
| C | 0.01193300  | -2.95484400 | -2.73908500 |
| H | -0.90569600 | -2.43675900 | -3.01412800 |
| H | 0.43401800  | -3.49984100 | -3.58676500 |
| H | -0.20350700 | -3.64933500 | -1.92397400 |

**TS5-iso2**

|   |             |             |             |
|---|-------------|-------------|-------------|
| C | 4.84681900  | 0.43988900  | 1.28627200  |
| C | 4.82783300  | 1.28661200  | 0.00072300  |
| B | 2.81784000  | 0.30357800  | 0.29400800  |
| O | 3.63229200  | -0.30525100 | 1.23154400  |
| O | 3.45369900  | 1.33086500  | -0.36623500 |
| C | 1.30442700  | 2.27610000  | -2.30939900 |
| C | 2.11244700  | 1.20704100  | -3.07343800 |
| B | 0.79870700  | 0.20962400  | -1.49317700 |
| O | 0.33573200  | 1.54024200  | -1.57808600 |
| O | 1.88285100  | -0.00479800 | -2.37504300 |
| C | 0.01517500  | -2.11981000 | -1.74680200 |
| C | -0.80272300 | -3.16891100 | -1.50802400 |

|   |             |             |             |            |             |             |             |
|---|-------------|-------------|-------------|------------|-------------|-------------|-------------|
| C | -2.10352200 | -2.86761700 | -0.92443200 |            |             |             |             |
| C | -2.49165300 | -1.60548900 | -0.66604000 |            |             |             |             |
| C | -1.59381000 | -0.41776700 | -0.93370600 | <b>TS6</b> |             |             |             |
| N | -0.28801700 | -0.82054700 | -1.45952000 |            |             |             |             |
| H | 1.00429900  | -2.24879600 | -2.17722600 | C          | 3.78083500  | 2.71262000  | -0.09378200 |
| H | -0.52956200 | -4.18113500 | -1.76592500 | C          | 4.64199000  | 1.43426200  | -0.10495700 |
| H | -3.46151200 | -1.39591400 | -0.22613600 | B          | 2.50240200  | 0.92051400  | -0.56686000 |
| H | -2.08131200 | 0.24786400  | -1.66290600 | O          | 2.44245300  | 2.23231700  | -0.14886800 |
| C | -1.51418700 | 0.39155500  | 0.36921600  | O          | 3.79092800  | 0.44179700  | -0.66788200 |
| C | -2.99604200 | -3.95438600 | -0.60663100 | C          | 0.92349800  | -2.95289000 | -2.34920100 |
| N | -3.69803600 | -4.83859500 | -0.35123600 | C          | 2.07446700  | -3.21486100 | -1.34964400 |
| H | 5.69646000  | -0.24430600 | 1.33587100  | B          | 1.19397400  | -1.14644400 | -0.98762400 |
| H | 5.39951300  | 0.81414000  | -0.80537800 | O          | 0.59216200  | -1.58729100 | -2.16747500 |
| H | 5.20258100  | 2.30096900  | 0.15369900  | O          | 2.03648200  | -2.12078400 | -0.44407200 |
| H | 4.84220900  | 1.06486400  | 2.18692000  | C          | -0.91099500 | -2.58490600 | 0.19177600  |
| H | 1.76542800  | 1.10385700  | -4.10943100 | C          | -2.17402100 | -2.91736900 | -0.08813000 |
| H | 3.18313400  | 1.43433900  | -3.07997300 | C          | -3.17758400 | -1.85640900 | -0.24030100 |
| H | 0.79963800  | 2.97830400  | -2.98028500 | C          | -2.79769700 | -0.57175100 | -0.31578300 |
| H | 1.94656100  | 2.83700700  | -1.62222900 | C          | -1.33766700 | -0.20233100 | -0.29307600 |
| O | 1.52495400  | -0.04917400 | 0.07265200  | N          | -0.45945800 | -1.24218600 | 0.31084500  |
| C | -2.58174400 | 1.40437000  | 0.55575100  | H          | -0.14329300 | -3.33116200 | 0.37716500  |
| C | -3.41310300 | 1.37613200  | 1.67887700  | H          | -2.47390600 | -3.95425000 | -0.17711800 |
| C | -2.75459600 | 2.41111800  | -0.40252700 | H          | -3.52369100 | 0.23092500  | -0.41001400 |
| C | -4.40599800 | 2.33832700  | 1.84302900  | H          | -1.00892100 | -0.00269600 | -1.32236600 |
| H | -3.28529400 | 0.58432400  | 2.41163900  | C          | -1.11962400 | 0.99738700  | 0.60994200  |
| C | -3.74134800 | 3.37482900  | -0.23025900 | C          | -4.56985300 | -2.21723000 | -0.27900400 |
| H | -2.07860400 | 2.44655000  | -1.25246900 | N          | -5.68438200 | -2.52796700 | -0.30723700 |
| C | -4.57176800 | 3.33794600  | 0.88883400  | H          | 3.92293300  | 3.31374500  | 0.80755500  |
| H | -5.05339500 | 2.30263900  | 2.71330900  | H          | 4.92333900  | 1.12828300  | 0.91021000  |
| H | -3.86125800 | 4.16054600  | -0.96926700 | H          | 5.54883000  | 1.53224400  | -0.70626800 |
| H | -5.34662800 | 4.08707900  | 1.01577500  | H          | 3.97509100  | 3.34139500  | -0.97012400 |
| C | -0.59351000 | 0.20730800  | 1.32278700  | H          | 1.94806200  | -4.15615700 | -0.80267700 |
| H | -0.62798900 | 0.83784400  | 2.20567300  | H          | 3.05020200  | -3.23489700 | -1.84785600 |
| C | 0.49924700  | -0.79397300 | 1.23559400  | H          | 0.04937400  | -3.58076100 | -2.14093900 |
| H | 0.25862800  | -1.67230700 | 0.64573500  | H          | 1.22864800  | -3.11902800 | -3.38641000 |
| N | 1.14588000  | -1.13215200 | 2.37574700  | O          | 1.38523500  | 0.22245400  | -0.84059200 |
| C | 1.53378600  | -0.15590800 | 3.37986400  | C          | -1.53851200 | 2.34664200  | 0.19390600  |
| H | 1.27636800  | 0.85344200  | 3.05748000  | C          | -2.29330100 | 3.16365200  | 1.04085000  |
| H | 1.04110500  | -0.36260800 | 4.33595800  | C          | -1.16405800 | 2.82458000  | -1.06716000 |
| H | 2.61845000  | -0.19458100 | 3.51913000  | C          | -2.66784000 | 4.44027400  | 0.63360000  |
| C | 1.83318400  | -2.40980400 | 2.46612400  | H          | -2.59536300 | 2.78385200  | 2.01258800  |
| H | 1.42114900  | -3.09686600 | 1.72475200  | C          | -1.53650400 | 4.10193000  | -1.46904300 |
| H | 2.90686500  | -2.28911600 | 2.29130800  | H          | -0.54752500 | 2.20209500  | -1.70951100 |
| H | 1.67192500  | -2.83554600 | 3.46135300  | C          | -2.29206500 | 4.91018000  | -0.62193400 |



|   |             |             |             |
|---|-------------|-------------|-------------|
| H | -3.25998100 | 5.06556300  | 1.29409700  |
| H | -1.23191800 | 4.46980000  | -2.44346000 |
| H | -2.58782400 | 5.90461300  | -0.94031000 |
| C | -0.56215100 | 0.62261800  | 1.75657100  |
| H | -0.31123800 | 1.27396300  | 2.58573400  |
| C | -0.25914500 | -0.85015000 | 1.80160900  |
| H | -1.04586100 | -1.39360900 | 2.34922300  |
| N | 0.96589100  | -1.17398200 | 2.43636300  |
| C | 2.16972000  | -0.40865900 | 2.15781500  |
| H | 2.76555700  | -0.83776600 | 1.34198400  |
| H | 1.90965400  | 0.62423800  | 1.91078500  |
| H | 2.78915500  | -0.39368300 | 3.06260200  |
| C | 1.22847200  | -2.57739800 | 2.68069500  |
| H | 0.29923000  | -3.08216600 | 2.96422000  |
| H | 1.66230100  | -3.08161100 | 1.80378800  |
| H | 1.93502200  | -2.67344900 | 3.51234300  |

### TS6-iso

|   |             |             |             |
|---|-------------|-------------|-------------|
| C | 4.57224600  | 2.63170500  | 0.17119100  |
| C | 5.27322800  | 1.32399300  | -0.25917800 |
| B | 3.05770900  | 0.97737600  | -0.01928100 |
| O | 3.24376700  | 2.23865500  | 0.49312000  |
| O | 4.20674600  | 0.42804100  | -0.54911400 |
| C | 1.93028200  | -2.57761600 | -2.02644200 |
| C | 2.66338100  | -3.00155400 | -0.73354600 |
| B | 1.71475200  | -0.96163700 | -0.44969200 |
| O | 1.58045300  | -1.21890500 | -1.81001000 |
| O | 2.28213900  | -2.03793100 | 0.24008900  |
| C | -0.59965600 | -2.45997900 | -0.07528100 |
| C | -1.65729600 | -2.81582800 | -0.81445500 |
| C | -2.63552200 | -1.78993500 | -1.18963600 |
| C | -2.36575800 | -0.48785200 | -1.00546200 |
| C | -1.00852900 | -0.05954200 | -0.51350400 |
| N | -0.27592300 | -1.12125000 | 0.22300600  |
| H | 0.10543900  | -3.18301000 | 0.32371600  |
| H | -1.83800600 | -3.85210100 | -1.06966800 |
| H | -3.10530500 | 0.28017400  | -1.21159300 |
| H | -0.38826900 | 0.23202100  | -1.37598500 |
| C | -1.09360500 | 1.06994600  | 0.49524900  |
| C | -3.91947500 | -2.20959100 | -1.68640700 |
| N | -4.94437000 | -2.56753800 | -2.08757900 |
| H | 5.04186600  | 3.09620700  | 1.04163100  |

|   |             |             |             |
|---|-------------|-------------|-------------|
| H | 5.88523800  | 0.90480800  | 0.54709400  |
| H | 5.90098000  | 1.45208400  | -1.14431000 |
| H | 4.54254900  | 3.36450900  | -0.64264900 |
| H | 2.38044100  | -4.00588200 | -0.40087000 |
| H | 3.75130000  | -2.96812400 | -0.85839500 |
| H | 1.02460900  | -3.17123600 | -2.19541400 |
| H | 2.56855200  | -2.65321800 | -2.91079800 |
| O | 1.86292100  | 0.34878500  | 0.00159700  |
| C | -1.63312800 | 2.38935600  | 0.12971100  |
| C | -2.16610300 | 3.23723300  | 1.10978600  |
| C | -1.63636600 | 2.82004500  | -1.20254500 |
| C | -2.66610200 | 4.48698100  | 0.77044700  |
| H | -2.20109000 | 2.90115000  | 2.14161100  |
| C | -2.14160600 | 4.07134400  | -1.54238400 |
| H | -1.22640800 | 2.18203300  | -1.97972200 |
| C | -2.65544600 | 4.90933300  | -0.55805500 |
| H | -3.07570600 | 5.13027200  | 1.54244200  |
| H | -2.13097500 | 4.39080200  | -2.57929000 |
| H | -3.05178800 | 5.88384700  | -0.82341900 |
| C | -0.62907600 | 0.67401400  | 1.67949300  |
| H | -0.54325200 | 1.28481500  | 2.57021800  |
| C | -0.18625300 | -0.76165200 | 1.70608100  |
| H | 0.87042700  | -0.84943800 | 1.98136200  |
| N | -0.93102500 | -1.54767400 | 2.64034300  |
| C | -2.37632600 | -1.57681700 | 2.50552900  |
| H | -2.81758800 | -1.87066100 | 3.46323500  |
| H | -2.74831500 | -0.58272700 | 2.24918500  |
| H | -2.72162800 | -2.28664100 | 1.73860600  |
| C | -0.36755500 | -2.82207700 | 3.04249700  |
| H | 0.72375500  | -2.77295500 | 3.00083800  |
| H | -0.66634100 | -3.04735200 | 4.07220400  |
| H | -0.69979100 | -3.66103100 | 2.41046100  |

### TS7-2H<sub>2</sub>O

|   |             |            |             |
|---|-------------|------------|-------------|
| C | 2.20841800  | 1.60819100 | -0.70105800 |
| C | 1.72598100  | 2.85063200 | -0.58712600 |
| C | 0.34076900  | 3.05326700 | -0.13996400 |
| C | -0.43974800 | 1.96683600 | 0.09571500  |
| C | 0.08257300  | 0.62440100 | 0.13768800  |
| N | 1.50656500  | 0.46664400 | -0.28058400 |
| H | 3.19605400  | 1.41597700 | -1.10936200 |
| H | 2.32989200  | 3.70049000 | -0.87703500 |

|   |             |             |             |   |             |             |             |
|---|-------------|-------------|-------------|---|-------------|-------------|-------------|
| H | -1.49854900 | 2.10061600  | 0.29909800  | N | 1.63430100  | 0.17309900  | -0.36205400 |
| H | 0.02695900  | 0.16766600  | 1.56977500  | H | 3.22826800  | 0.88923300  | -1.52440600 |
| C | -0.59213900 | -0.52028400 | -0.46352400 | H | 2.65119200  | 3.27669000  | -1.20403400 |
| C | -0.19778900 | 4.37269600  | -0.05400300 | H | -1.02698100 | 2.10239100  | 0.73313600  |
| N | -0.62277800 | 5.45064200  | 0.01137700  | H | 0.52098200  | -0.25196600 | 1.47918500  |
| C | -2.03982800 | -0.77289700 | -0.33485400 | C | -0.56844200 | -0.57094200 | -0.38444200 |
| C | -2.71605500 | -1.52379600 | -1.30469900 | C | 0.45114200  | 4.20685100  | 0.12855300  |
| C | -2.77193700 | -0.27738100 | 0.75272100  | N | 0.19026800  | 5.32609400  | 0.28441400  |
| C | -4.07560100 | -1.78221300 | -1.18473700 | C | -2.02973500 | -0.60489300 | -0.21148800 |
| H | -2.16809400 | -1.88373700 | -2.17001300 | C | -2.85974900 | -0.98607000 | -1.27118100 |
| C | -4.13406300 | -0.53563600 | 0.87207200  | C | -2.60980600 | -0.25531400 | 1.01356200  |
| H | -2.27394900 | 0.32189300  | 1.51030200  | C | -4.24015200 | -1.01537200 | -1.11011600 |
| C | -4.79044700 | -1.29206100 | -0.09380900 | H | -2.41183700 | -1.23660800 | -2.22825600 |
| H | -4.58238000 | -2.36013800 | -1.95105000 | C | -3.99110100 | -0.28708700 | 1.17242500  |
| H | -4.68243000 | -0.14141000 | 1.72174300  | H | -1.96758800 | 0.01580400  | 1.84699000  |
| H | -5.85317800 | -1.49099100 | -0.00260200 | C | -4.81019700 | -0.66543600 | 0.11172200  |
| C | 0.30113700  | -1.33945800 | -1.07032400 | H | -4.87304300 | -1.30479900 | -1.94301100 |
| H | 0.06505400  | -2.27025100 | -1.56773500 | H | -4.42862700 | -0.01880400 | 2.12881000  |
| C | 1.68550000  | -0.77577500 | -0.98160500 | H | -5.88798300 | -0.68591500 | 0.23627300  |
| H | 2.20038100  | -0.64927100 | -1.95686000 | C | 0.18190100  | -1.49468900 | -1.03218900 |
| N | 2.63141800  | -1.69300200 | -0.19384300 | H | -0.18770300 | -2.37996200 | -1.53169200 |
| C | 2.72911900  | -3.01432100 | -0.82617600 | C | 1.63392200  | -1.16417400 | -0.86576200 |
| H | 3.04238500  | -2.92454500 | -1.87460700 | H | 2.27869500  | -1.29508300 | -1.74962000 |
| H | 3.46196700  | -3.61899900 | -0.28806000 | N | 2.27279400  | -2.05710800 | 0.23572500  |
| H | 1.76066800  | -3.51194800 | -0.77517200 | C | 2.05037100  | -3.48969800 | 0.00307100  |
| C | 3.95806900  | -1.07617700 | -0.06201800 | H | 2.45931400  | -3.78918700 | -0.96953500 |
| H | 4.40475900  | -0.88786600 | -1.04739800 | H | 2.54445700  | -4.06297500 | 0.78966100  |
| H | 3.85792700  | -0.13492500 | 0.48021300  | H | 0.98039600  | -3.69333500 | 0.03051400  |
| H | 4.61490600  | -1.74594700 | 0.49887600  | C | 3.70032000  | -1.74418300 | 0.38230300  |
| O | 1.77805900  | -2.02080300 | 2.12010500  | H | 4.25008900  | -2.02301100 | -0.52446900 |
| H | 2.18173000  | -1.84539900 | 1.02293900  | H | 3.80479000  | -0.67277200 | 0.55978500  |
| H | 2.49098900  | -1.94862700 | 2.76437600  | H | 4.11064600  | -2.29438300 | 1.23200200  |
| O | 0.09473100  | -0.38006100 | 2.57834400  | O | 0.99887900  | -1.10483100 | 2.16861200  |
| H | -0.75132900 | -0.83135600 | 2.69498000  | H | 1.69470000  | -1.67020800 | 1.24554000  |
| H | 0.94371300  | -1.22045000 | 2.38555200  | H | 1.55568200  | -0.66193500 | 2.82048400  |

### TS7-H<sub>2</sub>O

|   |             |            |             |
|---|-------------|------------|-------------|
| C | 2.35948200  | 1.20367900 | -0.95166000 |
| C | 2.03755900  | 2.49285800 | -0.78175800 |
| C | 0.79407600  | 2.83174900 | -0.07071300 |
| C | -0.05464400 | 1.84916400 | 0.31966000  |
| C | 0.29371700  | 0.44370400 | 0.23420500  |

### TS7

|   |             |            |             |
|---|-------------|------------|-------------|
| C | 1.99864700  | 1.44882500 | -1.24603000 |
| C | 1.64829500  | 2.72406800 | -1.03807500 |
| C | 0.38983300  | 3.02975500 | -0.34631300 |
| C | -0.45867500 | 2.00060800 | -0.05478400 |
| C | -0.06593600 | 0.63202000 | -0.15510200 |

|   |             |             |             |
|---|-------------|-------------|-------------|
| N | 1.30007600  | 0.36296400  | -0.68555000 |
| H | 2.86436100  | 1.18225500  | -1.84435100 |
| H | 2.24649500  | 3.52763100  | -1.44792100 |
| H | -1.46454800 | 2.21577100  | 0.29339100  |
| H | -0.00575500 | 0.15359600  | 1.36630300  |
| C | -0.87328400 | -0.47383900 | -0.62758100 |
| C | 0.01077500  | 4.38204300  | -0.10458600 |
| N | -0.28512000 | 5.48817900  | 0.08927600  |
| C | -2.32619900 | -0.59318300 | -0.39829100 |
| C | -3.13053600 | -1.27054800 | -1.32313700 |
| C | -2.93634400 | -0.03776600 | 0.73456900  |
| C | -4.49917100 | -1.39691500 | -1.11761000 |
| H | -2.67393200 | -1.67820800 | -2.21955400 |
| C | -4.30647100 | -0.16308000 | 0.93938400  |
| H | -2.33063600 | 0.48829400  | 1.46784600  |
| C | -5.09310900 | -0.84510400 | 0.01531100  |
| H | -5.10623400 | -1.92050200 | -1.84921600 |
| H | -4.75930800 | 0.27421700  | 1.82341000  |
| H | -6.16224900 | -0.94075800 | 0.17333500  |
| C | -0.09389000 | -1.39184400 | -1.26025800 |
| H | -0.44717000 | -2.30837200 | -1.71315800 |
| C | 1.32673700  | -0.92532100 | -1.34620600 |
| H | 1.70429700  | -0.85511800 | -2.38825100 |
| N | 2.32641700  | -1.83335500 | -0.63675300 |
| C | 2.04632400  | -3.25606400 | -0.84721000 |
| H | 2.04857100  | -3.51554900 | -1.91605800 |
| H | 2.81292400  | -3.84890100 | -0.34316800 |
| H | 1.07251000  | -3.50314600 | -0.42384500 |
| C | 3.69100500  | -1.51988900 | -1.07684400 |
| H | 3.82123400  | -1.70883900 | -2.15205200 |
| H | 3.90824500  | -0.46921000 | -0.87343500 |
| H | 4.40483500  | -2.13446900 | -0.52176500 |
| O | 2.45273000  | -1.11564500 | 1.81170400  |
| H | 2.36424500  | -1.43960900 | 0.78592800  |
| O | 0.25754400  | -0.32782600 | 2.31757400  |
| H | 1.34757800  | -0.70693200 | 2.11228700  |
| C | -0.55951400 | -1.47225600 | 2.58078800  |
| H | -0.00153800 | -2.13953800 | 3.24177700  |
| H | -1.47920500 | -1.15927600 | 3.07705700  |
| H | -0.80660200 | -1.99449700 | 1.65152300  |
| C | 3.36166100  | -0.01740500 | 1.91245000  |
| H | 3.08757600  | 0.78311500  | 1.21668500  |
| H | 3.32517800  | 0.36133500  | 2.93539300  |
| H | 4.37643200  | -0.36466900 | 1.70194900  |

### TS7-MeOH

|   |             |             |             |
|---|-------------|-------------|-------------|
| C | 2.25624200  | 1.08688100  | -1.19966400 |
| C | 2.02126400  | 2.39191400  | -0.99871200 |
| C | 0.79160900  | 2.79834200  | -0.29994100 |
| C | -0.10938500 | 1.86313300  | 0.09556800  |
| C | 0.16562100  | 0.44512200  | 0.01623800  |
| N | 1.44471200  | 0.10061300  | -0.65909100 |
| H | 3.10493400  | 0.72692100  | -1.77503900 |
| H | 2.69285700  | 3.14125400  | -1.39423800 |
| H | -1.06295100 | 2.16992000  | 0.51555200  |
| H | 0.48089300  | -0.21756000 | 1.27909300  |
| C | -0.76482500 | -0.56676600 | -0.48332300 |
| C | 0.52078100  | 4.18956600  | -0.10626300 |
| N | 0.31775500  | 5.32150900  | 0.04523900  |
| C | -2.20988800 | -0.54810700 | -0.20556900 |
| C | -3.12157900 | -0.99196800 | -1.17012300 |
| C | -2.69596000 | -0.08597300 | 1.02365400  |
| C | -4.48713700 | -0.97402800 | -0.91150500 |
| H | -2.74883800 | -1.32961800 | -2.13245200 |
| C | -4.06278100 | -0.06960800 | 1.28028700  |
| H | -1.99262500 | 0.23713300  | 1.78609700  |
| C | -4.96241000 | -0.51241700 | 0.31411000  |
| H | -5.18343200 | -1.31382000 | -1.67153400 |
| H | -4.42534600 | 0.28643500  | 2.23918100  |
| H | -6.02877300 | -0.49618600 | 0.51399000  |
| C | -0.08788200 | -1.53949600 | -1.14494100 |
| H | -0.51753100 | -2.43378300 | -1.57511100 |
| C | 1.38058800  | -1.24947100 | -1.10772800 |
| H | 1.95020000  | -1.43317200 | -2.03354500 |
| N | 2.08680400  | -2.12629100 | -0.02506500 |
| C | 1.77846000  | -3.55418700 | -0.16765400 |
| H | 2.07521200  | -3.91564300 | -1.16036900 |
| H | 2.32124600  | -4.11910700 | 0.59251500  |
| H | 0.70847900  | -3.70572800 | -0.02937700 |
| C | 3.53619000  | -1.88717100 | -0.05340700 |
| H | 3.96084200  | -2.21462500 | -1.01109500 |
| H | 3.72342400  | -0.82050700 | 0.08226300  |
| H | 4.01803200  | -2.44024000 | 0.75591800  |
| O | 1.10811000  | -0.95084900 | 1.95346600  |
| H | 1.61045100  | -1.62638500 | 1.03270600  |
| C | 2.11127600  | -0.15147700 | 2.56071800  |

|   |            |             |            |
|---|------------|-------------|------------|
| H | 3.01986400 | -0.74488500 | 2.71150300 |
| H | 2.35514200 | 0.71694100  | 1.93239800 |
| H | 1.76705100 | 0.20290000  | 3.53575900 |

**TS8**

|   |             |             |             |
|---|-------------|-------------|-------------|
| C | 2.32355400  | 1.14381000  | -1.18889600 |
| C | 2.12080900  | 2.45292700  | -0.98719100 |
| C | 0.89025000  | 2.89849300  | -0.31497500 |
| C | -0.07553500 | 1.98036200  | -0.02402300 |
| C | 0.15408600  | 0.57282500  | -0.13494700 |
| N | 1.48685100  | 0.16139800  | -0.65041200 |
| H | 3.17173600  | 0.76638700  | -1.75341400 |
| H | 2.81800700  | 3.18293200  | -1.37645100 |
| H | -1.04982000 | 2.31118400  | 0.32480900  |
| H | 0.37930700  | -0.11375100 | 1.20545700  |
| C | -0.76506700 | -0.43195300 | -0.64494300 |
| C | 0.67076900  | 4.28594800  | -0.06775100 |
| N | 0.50563300  | 5.41731700  | 0.13487300  |
| C | -2.22140600 | -0.40292400 | -0.41510000 |
| C | -3.10127100 | -0.92944700 | -1.36843600 |
| C | -2.75532800 | 0.13860100  | 0.76134300  |
| C | -4.47353000 | -0.91993700 | -1.14850200 |
| H | -2.69754800 | -1.32707100 | -2.29458400 |
| C | -4.12894400 | 0.14916900  | 0.98046100  |
| H | -2.08208200 | 0.54524000  | 1.51178600  |
| C | -4.99319900 | -0.38145800 | 0.02669600  |
| H | -5.14202700 | -1.32618900 | -1.90098500 |
| H | -4.52453700 | 0.57201200  | 1.89855300  |
| H | -6.06500600 | -0.37116000 | 0.19557000  |
| C | -0.07912400 | -1.43041000 | -1.25617600 |
| H | -0.52237000 | -2.31144900 | -1.70044300 |
| C | 1.40262100  | -1.16480800 | -1.22976600 |
| H | 1.89160200  | -1.20721600 | -2.22728300 |
| N | 2.13962200  | -2.14132100 | -0.35097200 |
| C | 1.92499300  | -3.51310400 | -0.79989500 |
| H | 2.22585000  | -3.65648600 | -1.85205000 |
| H | 2.51619500  | -4.19371000 | -0.18219800 |
| H | 0.87193200  | -3.78035600 | -0.69755700 |
| C | 3.56696300  | -1.83396800 | -0.35080300 |
| H | 4.00572600  | -1.90352800 | -1.36176200 |
| H | 3.72612100  | -0.82167400 | 0.02747500  |
| H | 4.09434500  | -2.53678900 | 0.29996300  |

|   |             |             |            |
|---|-------------|-------------|------------|
| N | 0.93659200  | -0.88964600 | 1.93690900 |
| C | -0.04193400 | -1.64875200 | 2.71962200 |
| H | 0.45407200  | -2.37031700 | 3.37575600 |
| H | -0.63502100 | -0.96173500 | 3.32846300 |
| H | -0.70518500 | -2.17211600 | 2.02784800 |
| C | 1.90453600  | -0.11752400 | 2.72301000 |
| H | 2.53474000  | -0.77382500 | 3.33019900 |
| H | 2.52046000  | 0.46070300  | 2.03106000 |
| H | 1.36704100  | 0.57270400  | 3.37763700 |
| H | 1.42612900  | -1.50513700 | 1.24098400 |

**TS9**

|   |             |             |             |
|---|-------------|-------------|-------------|
| C | 2.32863700  | 0.87561700  | -1.39999500 |
| C | 2.31655900  | 2.18428600  | -1.09851500 |
| C | 1.19092200  | 2.76066200  | -0.36331300 |
| C | 0.04706800  | 1.98250200  | -0.20391900 |
| C | 0.05346100  | 0.63291300  | -0.52550900 |
| N | 1.32072800  | 0.02699400  | -0.90277200 |
| H | 3.08803400  | 0.40688500  | -2.01795000 |
| H | 3.10287600  | 2.83210200  | -1.46645200 |
| H | -0.87830200 | 2.43937400  | 0.13387700  |
| H | 0.30539100  | -0.28554500 | 1.30851500  |
| C | -0.92726000 | -0.37667800 | -0.67872900 |
| C | 1.20904700  | 4.11908400  | 0.04104100  |
| N | 1.23493000  | 5.23077900  | 0.38500400  |
| C | -2.36257500 | -0.22244600 | -0.37893900 |
| C | -3.32154800 | -0.82293100 | -1.20397900 |
| C | -2.80293500 | 0.49671800  | 0.73979700  |
| C | -4.67735600 | -0.70126600 | -0.92344800 |
| H | -2.99078100 | -1.36966700 | -2.08191000 |
| C | -4.16001400 | 0.62250500  | 1.01776700  |
| H | -2.07131300 | 0.95118300  | 1.40277400  |
| C | -5.10333600 | 0.02323900  | 0.18760800  |
| H | -5.40583300 | -1.16671200 | -1.58014500 |
| H | -4.47975600 | 1.18668800  | 1.88832600  |
| H | -6.16224900 | 0.12137100  | 0.40338100  |
| C | -0.32566700 | -1.53385200 | -1.13592900 |
| H | -0.84756100 | -2.43514100 | -1.42487700 |
| C | 1.14859800  | -1.34612800 | -1.25404200 |
| H | 1.61631100  | -1.61461400 | -2.22764600 |
| N | 1.93249600  | -2.23168400 | -0.22828100 |
| C | 1.59864900  | -3.64437000 | -0.40487000 |

|   |             |             |             |
|---|-------------|-------------|-------------|
| H | 1.82659600  | -3.98120700 | -1.42791300 |
| H | 2.17645400  | -4.25352600 | 0.29501900  |
| H | 0.53501000  | -3.79419700 | -0.21350100 |
| C | 3.37525900  | -2.02307900 | -0.37103200 |
| H | 3.71146000  | -2.25737500 | -1.39318800 |
| H | 3.62230400  | -0.98201700 | -0.15205000 |
| H | 3.91747300  | -2.66861300 | 0.32571400  |
| N | 0.99266500  | -0.87164800 | 1.81375700  |
| C | 0.31559300  | -1.67310400 | 2.84359700  |
| H | 1.03468200  | -2.35632700 | 3.30067100  |
| H | -0.11076200 | -1.02800500 | 3.61549700  |
| H | -0.48086300 | -2.24426300 | 2.36365600  |
| C | 2.05560300  | 0.02184900  | 2.31353500  |
| H | 2.87788900  | -0.58146500 | 2.70555300  |
| H | 2.40027600  | 0.63826500  | 1.47951300  |
| H | 1.66849400  | 0.66792000  | 3.10497900  |
| H | 1.42622000  | -1.55933200 | 0.97743300  |

**TS-A**

|   |             |             |             |
|---|-------------|-------------|-------------|
| C | 1.49840800  | 4.24130000  | 0.17851400  |
| C | 1.95974700  | 3.60671600  | -1.14904600 |
| B | 1.26971900  | 2.00090100  | 0.24228000  |
| O | 0.91599900  | 3.16375800  | 0.90140100  |
| O | 2.10919000  | 2.22879200  | -0.83983900 |
| C | -0.07610500 | 0.13435900  | -1.11283400 |
| C | -1.02077700 | -0.82122900 | -1.72491000 |
| C | -2.34267100 | -0.48776300 | -1.84222200 |
| C | -2.78847200 | 0.79627700  | -1.44050300 |
| C | -1.80895500 | 1.74075800  | -1.03588600 |
| N | -0.53992600 | 1.48341500  | -0.94862500 |
| H | 0.87723100  | 0.16078800  | -1.65691800 |
| H | -0.65808200 | -1.79439400 | -2.03946500 |
| H | -3.83623200 | 1.06214100  | -1.48278400 |
| H | -2.11853700 | 2.75684700  | -0.79452600 |
| C | -1.22454000 | 0.60246100  | 2.09135300  |
| C | -0.83724300 | -0.45213100 | 1.26143200  |
| C | -1.64188800 | -1.59494000 | 1.20951900  |
| C | -2.80766400 | -1.68078600 | 1.96360500  |
| C | -3.18662800 | -0.62394700 | 2.78698300  |
| C | -2.38985000 | 0.51453700  | 2.84862600  |
| H | -0.60725300 | 1.49291700  | 2.14319100  |
| H | -1.37558800 | -2.42832700 | 0.56571300  |

|   |             |             |             |
|---|-------------|-------------|-------------|
| H | -3.41905800 | -2.57572300 | 1.90659600  |
| H | -2.67341000 | 1.34360200  | 3.48939900  |
| C | 0.40412900  | -0.30499200 | 0.38174000  |
| O | 1.18492700  | 0.76322900  | 0.85266000  |
| H | -4.09554500 | -0.68973000 | 3.37652000  |
| C | 1.22894000  | -1.55731600 | 0.29017400  |
| C | 2.57127500  | -1.49966700 | 0.25806800  |
| C | -3.28552900 | -1.44241000 | -2.36864000 |
| N | -4.04350200 | -2.20960100 | -2.78672300 |
| H | 0.76189100  | 5.03602800  | 0.03127600  |
| H | 2.34101600  | 4.64584400  | 0.75153600  |
| H | 2.90544400  | 4.01323000  | -1.51545400 |
| H | 1.19492700  | 3.72138700  | -1.92767100 |
| H | 0.70136500  | -2.50247600 | 0.24795900  |
| N | 3.44200600  | -2.56409400 | 0.23521300  |
| C | 4.75544200  | -2.34630600 | -0.33851200 |
| H | 5.46038000  | -3.07784700 | 0.06567000  |
| H | 4.75894200  | -2.42977300 | -1.43583900 |
| H | 5.10573600  | -1.34762800 | -0.06918900 |
| C | 2.88592600  | -3.88579900 | 0.06498800  |
| H | 3.68326300  | -4.62689000 | 0.14840500  |
| H | 2.15094100  | -4.08061700 | 0.85128400  |
| H | 2.38895800  | -4.00776400 | -0.91125900 |
| H | 3.05277000  | -0.52512100 | 0.29662600  |

**TS-B**

|   |             |             |             |
|---|-------------|-------------|-------------|
| C | 4.35796400  | 0.63782400  | -0.56992200 |
| C | 4.40188700  | 0.91441800  | -2.07958900 |
| B | 2.22163500  | 0.52430000  | -1.45319800 |
| O | 3.07046100  | 0.10020600  | -0.35365500 |
| O | 3.05715500  | 1.11290600  | -2.43264500 |
| C | -1.88350300 | -3.06999900 | -0.59945900 |
| C | -3.27385600 | -2.78755100 | -0.66544400 |
| C | -3.66513400 | -1.42918600 | -0.57357600 |
| C | -2.72065400 | -0.44670300 | -0.48914100 |
| C | -1.26092000 | -0.78101400 | -0.57302900 |
| N | -0.93482000 | -2.19020500 | -0.52394900 |
| H | -1.57189100 | -4.11484800 | -0.59326500 |
| H | -4.00606900 | -3.58071700 | -0.73665100 |
| H | -3.01900600 | 0.59257100  | -0.41901400 |
| H | -0.86511100 | -0.40741500 | -1.54443800 |
| C | -0.42136400 | 0.07123300  | 0.39193600  |

|   |             |             |             |   |             |             |             |
|---|-------------|-------------|-------------|---|-------------|-------------|-------------|
| C | -5.06600900 | -1.08755200 | -0.55263200 | C | 1.02170200  | 0.23675800  | -1.30372700 |
| N | -6.19226300 | -0.82488200 | -0.53434000 | N | 2.05985400  | 1.03176600  | -0.62727700 |
| H | 5.13541700  | -0.06634300 | -0.24401800 | H | 3.56181300  | 0.91471000  | 0.79281600  |
| H | 4.81823800  | 0.05243800  | -2.62282000 | H | 3.97231100  | -1.49851900 | 0.56308400  |
| H | 5.00378900  | 1.79518900  | -2.32796100 | H | 0.88962500  | -1.66572300 | -2.45936400 |
| H | 4.48136300  | 1.56848100  | 0.00501200  | H | 0.72202300  | 0.79183800  | -2.20468400 |
| O | 0.93534000  | 0.38205800  | -1.50479800 | C | -0.29062800 | 0.27436500  | -0.42658400 |
| C | -0.89063100 | 1.47625200  | 0.54463900  | C | 2.80634900  | -3.11313900 | -1.30618300 |
| C | -0.91665700 | 2.35811800  | -0.54269700 | N | 3.08923900  | -4.21370400 | -1.52708400 |
| C | -1.37694100 | 1.89325400  | 1.78843300  | H | -5.20387200 | -1.23318700 | -0.67277900 |
| C | -1.42357900 | 3.64173600  | -0.37247100 | H | -4.84462600 | 0.22239100  | 1.19393600  |
| H | -0.47994600 | 2.02476900  | -1.47932800 | H | -4.79870900 | 1.66176200  | 0.15172800  |
| C | -1.88885300 | 3.17823400  | 1.94630200  | H | -5.64047000 | 0.23217500  | -1.57889500 |
| H | -1.37317800 | 1.20110000  | 2.62568400  | O | -1.34051400 | -0.02867800 | -1.34203800 |
| C | -1.91442700 | 4.05386900  | 0.86558600  | C | -0.33656400 | -0.71936100 | 0.73114800  |
| H | -1.42649300 | 4.32828600  | -1.21291300 | C | -0.33898500 | -0.32483700 | 2.06959800  |
| H | -2.27064100 | 3.49097300  | 2.91278900  | C | -0.45577100 | -2.08422500 | 0.43949800  |
| H | -2.31287200 | 5.05591600  | 0.98783400  | C | -0.38777400 | -1.27104200 | 3.09077200  |
| C | 0.51958800  | -0.36252200 | 1.29706500  | H | -0.34693300 | 0.72872900  | 2.32400100  |
| H | 0.90460100  | 0.39223600  | 1.97311300  | C | -0.50022700 | -3.02987200 | 1.45668000  |
| C | 1.29822800  | -1.50820000 | 1.06559600  | H | -0.52623000 | -2.40656800 | -0.59353300 |
| H | 1.00771600  | -2.17894000 | 0.26445100  | C | -0.45086100 | -2.62652700 | 2.78881200  |
| N | 2.41944300  | -1.78006200 | 1.69085300  | H | -0.38946500 | -0.94193500 | 4.12511700  |
| C | 2.99085000  | -0.84234900 | 2.64923000  | H | -0.57711400 | -4.08309500 | 1.20683900  |
| H | 2.26447500  | -0.61000300 | 3.42966000  | H | -0.48261600 | -3.36383000 | 3.58464500  |
| H | 3.86788700  | -1.29821200 | 3.10818700  | C | -0.30288500 | 1.74206700  | -0.03826000 |
| H | 3.27500900  | 0.06936300  | 2.11237500  | H | -0.90502300 | 2.37808800  | -0.67800900 |
| C | 3.33640600  | -2.76315700 | 1.13128400  | C | 0.84236600  | 2.23708100  | 0.58961000  |
| H | 2.79278600  | -3.42262200 | 0.45545600  | H | 1.26161600  | 1.69065000  | 1.42865100  |
| H | 4.11344000  | -2.23788100 | 0.56682500  | N | 1.24167000  | 3.55088500  | 0.53813000  |
| H | 3.78778200  | -3.35138100 | 1.93318500  | C | 0.91262800  | 4.27997700  | -0.67631600 |

### TS-C

|   |             |             |             |
|---|-------------|-------------|-------------|
| C | -4.86337600 | -0.23585400 | -0.96993000 |
| C | -4.46393600 | 0.62376000  | 0.25202500  |
| B | -2.63567200 | 0.06012300  | -0.93735500 |
| O | -3.66780700 | -0.36281800 | -1.73366300 |
| O | -3.03898400 | 0.59468200  | 0.26234400  |
| C | 2.93522600  | 0.31913500  | 0.12874400  |
| C | 3.17414000  | -1.01958700 | 0.01159600  |
| C | 2.45090400  | -1.74916400 | -1.01510800 |
| C | 1.45023200  | -1.14807500 | -1.68795000 |

### TS-D

|   |             |            |            |
|---|-------------|------------|------------|
| C | -3.53072100 | 0.43796000 | 2.10648000 |
| C | -3.11169700 | 1.73882900 | 1.38564100 |

|   |             |             |             |             |             |             |             |
|---|-------------|-------------|-------------|-------------|-------------|-------------|-------------|
| B | -1.47953000 | 0.18278100  | 1.20354300  | H           | 2.97200200  | 4.37722000  | 1.11868200  |
| O | -2.37206900 | -0.39124100 | 2.07039500  |             |             |             |             |
| O | -1.88678700 | 1.40779300  | 0.72510600  |             |             |             |             |
| C | -1.12131800 | -2.90653100 | -0.91451200 | <b>TS-E</b> |             |             |             |
| C | -2.37134000 | -2.26915800 | -0.81275500 |             |             |             |             |
| C | -2.45935900 | -0.95795700 | -1.31860200 | C           | -3.31150400 | 1.60048100  | -0.88615700 |
| C | -1.33109200 | -0.32642000 | -1.80098600 | C           | -2.44796300 | 2.51836400  | -1.77890300 |
| C | -0.06019700 | -0.97778400 | -1.63133500 | B           | -1.23518900 | 0.75265600  | -1.09893500 |
| N | -0.02303400 | -2.34138100 | -1.35903700 | O           | -2.39246900 | 0.62451200  | -0.38125600 |
| H | -1.04249700 | -3.95794800 | -0.64167700 | O           | -1.24073600 | 1.78685000  | -1.99513600 |
| H | -3.23809100 | -2.77609000 | -0.40907100 | C           | 0.18941300  | -1.22046500 | -0.44901800 |
| H | -1.39096700 | 0.67749900  | -2.20551400 | H           | -3.75899000 | 2.13914200  | -0.04940000 |
| H | 0.75304800  | -0.64031900 | -2.27398200 | H           | -2.21204700 | 3.45883200  | -1.27134200 |
| C | 0.66199100  | -0.16403200 | -0.01134200 | H           | -2.91747700 | 2.73630900  | -2.74112600 |
| C | -3.71618100 | -0.25314700 | -1.28958500 | H           | -4.09044200 | 1.08173100  | -1.45411700 |
| N | -4.71675700 | 0.32549900  | -1.21904200 | O           | -0.11212500 | -0.02420000 | -1.01224600 |
| H | -3.82534700 | 0.60902600  | 3.14484700  | C           | -0.86713200 | -2.20025100 | -0.09326500 |
| H | -2.92089300 | 2.55747600  | 2.08741800  | C           | -0.81130700 | -3.47926100 | -0.65750000 |
| H | -3.84637200 | 2.05794600  | 0.64364600  | C           | -1.86149800 | -1.91022800 | 0.84743500  |
| H | -4.34909200 | -0.06544100 | 1.58229600  | C           | -1.74159200 | -4.44983100 | -0.30047800 |
| O | -0.32170000 | -0.47569000 | 0.91697300  | H           | -0.03824800 | -3.69952900 | -1.38747100 |
| C | 1.88558700  | -0.98008200 | 0.24855500  | C           | -2.78892700 | -2.88284000 | 1.20148800  |
| C | 2.95893700  | -0.96873900 | -0.65184700 | H           | -1.90219400 | -0.92456400 | 1.29528300  |
| C | 1.95578300  | -1.81208800 | 1.36886900  | C           | -2.73394600 | -4.15170600 | 0.62841000  |
| C | 4.08315500  | -1.75130700 | -0.42300000 | H           | -1.69203700 | -5.43607200 | -0.75060600 |
| H | 2.90923300  | -0.34562000 | -1.54055900 | H           | -3.55497800 | -2.65076800 | 1.93434600  |
| C | 3.08556800  | -2.59097400 | 1.59825700  | H           | -3.46185400 | -4.90656400 | 0.90872900  |
| H | 1.11953100  | -1.84050200 | 2.05659000  | C           | 1.50516000  | -1.51030700 | -0.30560800 |
| C | 4.15310100  | -2.56402500 | 0.70713600  | H           | 1.76183800  | -2.44855200 | 0.16928800  |
| H | 4.90429800  | -1.73249500 | -1.13253800 | C           | 2.52315600  | -0.54356200 | -0.64080300 |
| H | 3.12706100  | -3.22577500 | 2.47781100  | H           | 2.27912600  | 0.11808700  | -1.46797500 |
| H | 5.03154100  | -3.17570000 | 0.88625400  | N           | 3.85752900  | -0.85011000 | -0.54478600 |
| C | 0.82173800  | 1.26880000  | -0.32164100 | C           | 4.29501900  | -1.52595000 | 0.66600300  |
| H | -0.08332000 | 1.79374500  | -0.60055800 | H           | 3.72447300  | -2.43919700 | 0.83451100  |
| C | 1.98479700  | 1.94545900  | -0.19787500 | H           | 5.34610300  | -1.80189000 | 0.55845100  |
| H | 2.87779600  | 1.44325500  | 0.16561700  | H           | 4.18606200  | -0.86385200 | 1.53851300  |
| N | 2.17998900  | 3.26415700  | -0.51390300 | C           | 4.75021800  | 0.23352600  | -0.92076800 |
| C | 1.02740100  | 4.05520400  | -0.88674000 | H           | 4.76494900  | 1.01559500  | -0.14718100 |
| H | 0.29615200  | 4.13323700  | -0.06816600 | H           | 5.76111300  | -0.15719700 | -1.05781700 |
| H | 1.35619100  | 5.05675700  | -1.16929300 | H           | 4.41620700  | 0.67120300  | -1.86458900 |
| H | 0.52843800  | 3.59831600  | -1.74638400 | C           | 1.94653300  | 2.12313400  | 0.02002500  |
| C | 3.26393100  | 3.97305600  | 0.13865700  | C           | 0.81650900  | 2.87115700  | 0.21888300  |
| H | 4.10580000  | 3.29275900  | 0.28357100  | C           | -0.12948400 | 2.44408400  | 1.18148400  |
| H | 3.59569900  | 4.80155400  | -0.49287200 | C           | 0.18736900  | 1.29187200  | 1.94029500  |

|   |             |             |             |
|---|-------------|-------------|-------------|
| C | 1.34557400  | 0.60974500  | 1.66993100  |
| N | 2.22970200  | 0.96058000  | 0.68812000  |
| H | 2.67720200  | 2.42331800  | -0.72791700 |
| H | 0.64312200  | 3.76931400  | -0.36305500 |
| H | -0.47117000 | 0.95950300  | 2.73544800  |
| H | 1.59497500  | -0.28839900 | 2.22830000  |
| C | -1.35605500 | 3.13788100  | 1.36789700  |
| N | -2.36929000 | 3.69637300  | 1.48914900  |

**TS-F**

|   |             |             |             |
|---|-------------|-------------|-------------|
| C | 5.42947200  | 0.06543700  | 1.22064200  |
| C | 5.30126100  | 0.05635800  | -0.31434100 |
| B | 3.33237200  | -0.54377900 | 0.62928300  |
| O | 4.09236500  | -0.05669400 | 1.68349900  |
| O | 4.05069700  | -0.56914500 | -0.55868100 |
| C | 1.31402500  | -0.97773500 | -2.66396700 |
| C | 2.08677400  | -2.25887300 | -2.30927200 |
| B | 1.25187900  | -1.31131500 | -0.37477800 |
| O | 1.08241000  | -0.33423100 | -1.42636000 |
| O | 1.72714700  | -2.53071900 | -0.97269900 |
| C | -0.38240700 | -2.94305900 | 0.74207200  |
| C | -1.55680300 | -3.53316300 | 1.01114800  |
| C | -2.78677700 | -2.78315300 | 0.74769400  |
| C | -2.74159900 | -1.49255100 | 0.36635100  |
| C | -1.46145900 | -0.77476100 | 0.19887900  |
| N | -0.23750400 | -1.64881100 | 0.24479100  |
| H | 0.56681300  | -3.45215200 | 0.86584200  |
| H | -1.60390000 | -4.54229900 | 1.39501500  |
| H | -3.65452800 | -0.92791600 | 0.21961100  |
| H | -0.94572100 | -1.21121300 | -0.83065700 |
| C | -1.37203600 | 0.63049200  | 0.27150700  |
| C | -4.06163200 | -3.42194800 | 0.92561100  |
| N | -5.08291000 | -3.94766400 | 1.07098600  |
| H | 6.01924900  | -0.78565200 | 1.58120200  |
| H | 6.10348500  | -0.49940200 | -0.80630100 |
| H | 5.28164500  | 1.07517000  | -0.72348700 |
| H | 5.87670600  | 0.98618900  | 1.60542100  |
| H | 1.81471000  | -3.10161700 | -2.95464300 |
| H | 3.16810400  | -2.09105600 | -2.38071300 |
| H | 0.35636500  | -1.21613000 | -3.15550700 |
| H | 1.87793900  | -0.31600800 | -3.32985400 |
| O | 2.04339400  | -0.87176400 | 0.76534300  |

|   |             |            |             |
|---|-------------|------------|-------------|
| C | -2.59456100 | 1.40558400 | -0.06806000 |
| C | -3.10543600 | 2.34592700 | 0.83480700  |
| C | -3.25228800 | 1.21336200 | -1.28862500 |
| C | -4.25343700 | 3.06897100 | 0.52620500  |
| H | -2.60149600 | 2.49118400 | 1.78577700  |
| C | -4.39975900 | 1.93678900 | -1.59552800 |
| H | -2.84952300 | 0.49675800 | -1.99919100 |
| C | -4.90398100 | 2.86588200 | -0.68830000 |
| H | -4.64524800 | 3.78639300 | 1.24006800  |
| H | -4.89670600 | 1.77885200 | -2.54717500 |
| H | -5.79984700 | 3.42924500 | -0.92754900 |
| C | -0.16376200 | 1.29403400 | 0.56554700  |
| H | 0.66317500  | 0.68924300 | 0.91127000  |
| C | 0.03631100  | 2.63152200 | 0.31459400  |
| H | -0.77842900 | 3.25671900 | -0.04321900 |
| N | 1.21278700  | 3.25735100 | 0.46029700  |
| C | 2.41267300  | 2.47532500 | 0.72110400  |
| H | 2.55713000  | 1.74932600 | -0.09012200 |
| H | 3.27058500  | 3.14700600 | 0.77386100  |
| H | 2.33749300  | 1.92845400 | 1.66531900  |
| C | 1.37349900  | 4.66065100 | 0.13895600  |
| H | 0.39646000  | 5.10596500 | -0.05274500 |
| H | 1.84114800  | 5.19298000 | 0.97329100  |
| H | 1.99992900  | 4.78918400 | -0.75151500 |

**TS-G**

|   |             |             |             |
|---|-------------|-------------|-------------|
| C | -2.78502000 | -0.13625800 | 0.99807800  |
| C | -3.10032200 | 1.10594100  | 0.59151300  |
| C | -2.04593400 | 1.97940100  | 0.06338100  |
| C | -0.79030400 | 1.49685900  | -0.14145300 |
| C | -0.50071800 | 0.10714300  | 0.09393900  |
| N | -1.47031700 | -0.58168400 | 0.97377900  |
| H | -3.50810200 | -0.81100200 | 1.44769000  |
| H | -4.10949100 | 1.48116600  | 0.69561600  |
| H | -0.01308300 | 2.14646800  | -0.53174200 |
| H | -0.78524300 | -1.00213500 | -0.90136700 |
| C | 0.76298200  | -0.53012000 | 0.48066300  |
| C | -2.35551600 | 3.34215600  | -0.24475900 |
| N | -2.62218100 | 4.44288500  | -0.49407400 |
| C | 2.10320600  | 0.00576700  | 0.20334700  |
| C | 3.14296800  | -0.19707500 | 1.11838800  |
| C | 2.36856500  | 0.71015200  | -0.97723700 |



|   |             |             |             |   |             |             |             |
|---|-------------|-------------|-------------|---|-------------|-------------|-------------|
| C | 4.41644500  | 0.29543600  | 0.85991600  | H | 2.05828300  | 1.88080900  | -1.05975500 |
| H | 2.93422900  | -0.72519200 | 2.04393400  | C | 4.93358300  | 0.68876400  | 0.28532300  |
| C | 3.64417700  | 1.20175700  | -1.23361800 | H | 5.21383900  | -1.31169400 | 1.03272900  |
| H | 1.57532800  | 0.84738100  | -1.70656800 | H | 4.34743000  | 2.59794600  | -0.51521400 |
| C | 4.67146500  | 0.99747100  | -0.31607200 | H | 5.94306700  | 1.00646800  | 0.52411000  |
| H | 5.21064000  | 0.13844100  | 1.58283100  | C | 0.45888800  | -1.80561100 | -0.67691100 |
| H | 3.83682700  | 1.74230700  | -2.15482500 | H | 1.01876400  | -2.72492500 | -0.55848700 |
| H | 5.66519800  | 1.38537200  | -0.51495200 | C | -1.04315100 | -1.76100700 | -0.84654700 |
| C | 0.46422700  | -1.73508200 | 1.03875000  | H | -1.47973100 | -2.54888200 | -1.47710900 |
| H | 1.15685300  | -2.51382900 | 1.32550100  | N | -1.67425300 | -1.93562500 | 0.55047800  |
| C | -1.01553900 | -1.91974700 | 0.85175600  | C | -1.15492400 | -3.13015100 | 1.23807600  |
| H | -1.56968800 | -2.66366700 | 1.43140400  | H | -0.09768900 | -2.99699600 | 1.47032400  |
| N | -1.20394800 | -2.22076400 | -0.69121700 | H | -1.70502900 | -3.27187400 | 2.16963800  |
| C | -0.36695300 | -3.28885300 | -1.23284400 | H | -1.28055600 | -4.02261100 | 0.61295700  |
| H | -0.68940800 | -4.26594500 | -0.84743400 | C | -3.14875400 | -1.98653900 | 0.50227500  |
| H | -0.45044900 | -3.29708600 | -2.32247800 | H | -3.52844700 | -2.07674300 | 1.52173800  |
| H | 0.67324800  | -3.11564000 | -0.96527300 | H | -3.52776900 | -1.07152200 | 0.05216000  |
| C | -2.60602100 | -2.36890200 | -1.07844200 | H | -3.47624600 | -2.85511900 | -0.08201800 |
| H | -3.10973700 | -3.11123400 | -0.44416300 | O | -0.75031400 | 0.16020200  | 1.53277500  |
| H | -3.12547700 | -1.41233900 | -0.99215200 | H | 0.14451900  | -0.01888900 | 1.86160100  |
| H | -2.66275900 | -2.70240400 | -2.11726900 | H | -1.26096600 | -0.88818500 | 1.12569300  |

### TS-H

|   |             |             |             |
|---|-------------|-------------|-------------|
| C | -2.49162100 | 0.16403800  | -1.62970400 |
| C | -2.77487400 | 1.31502700  | -0.98362300 |
| C | -1.89719400 | 1.88777000  | 0.00796100  |
| C | -0.64140800 | 1.27506800  | 0.26354000  |
| C | -0.16661200 | 0.42151000  | -0.92575100 |
| N | -1.23187600 | -0.45591400 | -1.39221600 |
| H | -3.11048700 | -0.27046100 | -2.40721100 |
| H | -3.68488300 | 1.85179400  | -1.23362100 |
| H | 0.12480300  | 1.91351500  | 0.70698800  |
| H | 0.10305300  | 1.11712800  | -1.73299900 |
| C | 0.94860700  | -0.55922400 | -0.63810600 |
| C | -2.27369800 | 3.03833800  | 0.74080400  |
| N | -2.57407300 | 3.99025200  | 1.34068500  |
| C | 2.32239700  | -0.13282300 | -0.32859300 |
| C | 3.23047200  | -1.01738000 | 0.27143500  |
| C | 2.74314000  | 1.17530100  | -0.60022900 |
| C | 4.52452700  | -0.61366400 | 0.56905900  |
| H | 2.91239100  | -2.02618200 | 0.51795000  |
| C | 4.03888400  | 1.58122100  | -0.29639300 |

### TS-I

|   |             |             |             |
|---|-------------|-------------|-------------|
| C | 2.74552700  | -1.48563900 | -0.01977500 |
| C | 3.23451800  | -0.14786100 | -0.12859000 |
| C | 2.43685400  | 0.95478000  | -0.19310600 |
| C | 0.93368800  | 0.86526800  | -0.28775500 |
| C | 0.49224300  | -0.55012100 | 0.07729800  |
| N | 1.35962200  | -1.60019800 | -0.33235300 |
| H | 3.35023000  | -2.32016000 | -0.35481800 |
| H | 4.30960000  | -0.00987100 | -0.05953400 |
| H | 0.48589100  | 1.56064100  | 0.43531500  |
| H | 0.89365800  | -0.70995200 | 1.44611900  |
| C | -0.83804200 | -1.06142700 | -0.11835100 |
| C | 3.00861100  | 2.26223600  | -0.22613500 |
| N | 3.45691800  | 3.33237900  | -0.23584400 |
| C | -2.06566500 | -0.27599400 | 0.04733300  |
| C | -3.17274500 | -0.51140800 | -0.77992900 |
| C | -2.15216100 | 0.73357600  | 1.01666900  |
| C | -4.33243500 | 0.24108800  | -0.64031300 |
| H | -3.10488400 | -1.27360200 | -1.55023800 |
| C | -3.31143600 | 1.49041400  | 1.14936500  |

|   |             |             |             |
|---|-------------|-------------|-------------|
| H | -1.31524700 | 0.90199100  | 1.68861200  |
| C | -4.40464700 | 1.24641600  | 0.32214200  |
| H | -5.17898900 | 0.05041600  | -1.29183700 |
| H | -3.36318500 | 2.26597300  | 1.90638200  |
| H | -5.30896500 | 1.83657600  | 0.42659700  |
| C | -0.72801300 | -2.37982700 | -0.53337200 |
| H | -1.53679400 | -3.07276200 | -0.71748700 |
| C | 0.64266600  | -2.67921200 | -0.64039600 |
| H | 1.12692500  | -3.61923200 | -0.86800200 |
| O | 0.53995200  | 1.23550100  | -1.59727300 |
| H | -0.40132200 | 1.45075700  | -1.57413200 |
| O | 1.66877700  | -1.01697300 | 2.33065100  |
| H | 2.39560800  | -1.34465900 | 1.57455200  |
| H | 1.32808300  | -1.80333700 | 2.77831600  |

**TS-J**

|   |             |             |             |
|---|-------------|-------------|-------------|
| C | 2.65987400  | -1.67839100 | 0.07995500  |
| C | 3.22225000  | -0.44827800 | 0.02748400  |
| C | 2.45402900  | 0.77294000  | -0.02254300 |
| C | 1.04269400  | 0.60930300  | -0.56425800 |
| C | 0.44493900  | -0.61500000 | 0.13945400  |
| N | 1.25982900  | -1.77491500 | 0.06802300  |
| H | 3.20092700  | -2.61219800 | 0.13086900  |
| H | 4.30477800  | -0.38272500 | 0.07200800  |
| H | 0.43399400  | 1.48328700  | -0.29490200 |
| C | -0.90820400 | -1.09398700 | 0.05224800  |
| C | 3.13441000  | 1.97705200  | -0.38606800 |
| N | 3.67665400  | 2.97581400  | -0.62590900 |
| C | -2.09571700 | -0.23368700 | 0.04962900  |
| C | -3.24222400 | -0.61414100 | -0.66025700 |
| C | -2.10336400 | 0.98105800  | 0.75000800  |
| C | -4.36622400 | 0.20259300  | -0.67441400 |
| H | -3.23537900 | -1.54504000 | -1.21959700 |
| C | -3.22910300 | 1.79714900  | 0.73019000  |
| H | -1.23666900 | 1.26810100  | 1.33996100  |
| C | -4.36184300 | 1.41210600  | 0.01759900  |
| H | -5.24519700 | -0.10101800 | -1.23361900 |
| H | -3.22307600 | 2.73257900  | 1.27981200  |
| H | -5.23875100 | 2.05076500  | 0.00271000  |
| C | -0.86288300 | -2.48135100 | 0.02269700  |
| H | -1.70492300 | -3.15831200 | 0.04371500  |
| C | 0.48825400  | -2.86354900 | 0.03389900  |

|   |            |             |             |
|---|------------|-------------|-------------|
| H | 0.92554500 | -3.85256800 | 0.05219000  |
| O | 1.07700600 | 0.44780500  | -1.96778600 |
| H | 0.17636400 | 0.53426200  | -2.30415200 |
| H | 1.65784100 | 0.05124100  | 2.97690500  |
| O | 1.21836600 | 0.56419000  | 2.28407800  |
| H | 0.65560700 | -0.15982800 | 1.43217100  |
| H | 1.94924500 | 0.84629700  | 1.52304300  |

**TS-K**

|   |             |             |             |
|---|-------------|-------------|-------------|
| C | -2.26967700 | 0.13443100  | -1.78318100 |
| C | -2.66372500 | 1.09125600  | -0.81199900 |
| C | -1.54409000 | 1.76062800  | -0.03318400 |
| C | -0.25211000 | 1.46733100  | -0.24196900 |
| C | 0.13771700  | 0.35734100  | -1.19520300 |
| N | -0.99687000 | -0.48583600 | -1.54375800 |
| H | -2.58009900 | 0.24111200  | -2.81461400 |
| H | -3.38151800 | 1.83377600  | -1.16759500 |
| H | 0.53514000  | 2.01656600  | 0.27078400  |
| H | 0.57070900  | 0.80274300  | -2.10563100 |
| C | 1.11034100  | -0.61359300 | -0.55104700 |
| C | -1.89438500 | 2.77511500  | 0.92702900  |
| N | -2.18333600 | 3.59793400  | 1.68918400  |
| C | 2.49723100  | -0.25650700 | -0.21416000 |
| C | 3.22768800  | -1.01622700 | 0.71040100  |
| C | 3.11047500  | 0.86181700  | -0.79234200 |
| C | 4.53639700  | -0.68162300 | 1.02921000  |
| H | 2.75551100  | -1.86536600 | 1.19527100  |
| C | 4.42130300  | 1.19941500  | -0.46987900 |
| H | 2.56428100  | 1.46855600  | -1.50769000 |
| C | 5.13912400  | 0.42820600  | 0.43843300  |
| H | 5.08581500  | -1.28040600 | 1.74830900  |
| H | 4.88083600  | 2.06766400  | -0.93048600 |
| H | 6.16027100  | 0.69298700  | 0.69196400  |
| C | 0.48871800  | -1.78400100 | -0.34734000 |
| H | 0.93147600  | -2.68499500 | 0.06210500  |
| C | -0.94448300 | -1.67763400 | -0.77059200 |
| H | -1.33449800 | -2.53653000 | -1.32804700 |
| N | -1.91003500 | -1.63495300 | 0.48298700  |
| C | -1.28239200 | -1.32876200 | 1.78747300  |
| H | -0.65218100 | -0.44743200 | 1.68054900  |
| H | -2.08140700 | -1.10787400 | 2.49797300  |
| H | -0.68618400 | -2.17506800 | 2.13571800  |

|   |             |             |             |   |             |             |            |
|---|-------------|-------------|-------------|---|-------------|-------------|------------|
| C | -2.74196900 | -2.84949200 | 0.55686100  | C | -2.80229900 | -1.96539900 | 0.86433800 |
| H | -3.43684000 | -2.75946400 | 1.39415500  | H | -3.06798000 | -2.39854200 | 1.83186400 |
| H | -3.30316300 | -2.93559400 | -0.37479700 | H | -2.95031100 | -0.88623400 | 0.90220500 |
| H | -2.11115700 | -3.73177500 | 0.69616400  | H | -3.44878700 | -2.40013400 | 0.09330600 |
| O | -3.47766500 | 0.43611800  | 0.45606000  | O | 0.30927700  | -0.53628600 | 1.42528400 |
| H | -2.61373100 | -0.79809500 | 0.33903500  | H | 1.08640800  | -0.91957100 | 1.85154800 |
| H | -4.30723500 | 0.16402300  | 0.03839500  | H | -0.71865200 | -1.59568000 | 1.12924600 |

### TS-L

|   |             |             |             |
|---|-------------|-------------|-------------|
| C | -2.57866500 | 0.05613000  | -1.44214200 |
| C | -2.94262800 | 1.30556400  | -1.06857000 |
| C | -2.09721400 | 1.97618300  | -0.07864400 |
| C | -0.84396800 | 1.54591100  | 0.18225100  |
| C | -0.27845600 | 0.51455500  | -0.75641900 |
| N | -1.34824000 | -0.42417800 | -1.09438700 |
| H | -3.23095800 | -0.61584000 | -1.99455800 |
| H | -3.88964400 | 1.73241600  | -1.36648700 |
| H | -0.26113900 | 1.90681500  | 1.02051800  |
| H | 0.06542700  | 1.00219100  | -1.68667700 |
| C | 0.82392000  | -0.43449800 | -0.29217800 |
| C | -2.68531600 | 3.02617700  | 0.71339700  |
| N | -3.17297000 | 3.87404400  | 1.33260500  |
| C | 2.21518600  | 0.08742500  | -0.16064400 |
| C | 3.25781600  | -0.79682600 | 0.13885600  |
| C | 2.51066200  | 1.44528800  | -0.30485000 |
| C | 4.56209400  | -0.33860500 | 0.27939100  |
| H | 3.03782100  | -1.85369300 | 0.26180000  |
| C | 3.81780600  | 1.90515900  | -0.16872700 |
| H | 1.71867500  | 2.15404200  | -0.52805800 |
| C | 4.84733600  | 1.01638500  | 0.12383300  |
| H | 5.35824800  | -1.03947200 | 0.50962400  |
| H | 4.02943500  | 2.96275600  | -0.28883700 |
| H | 5.86511500  | 1.37627300  | 0.23315000  |
| C | 0.55335600  | -1.65991600 | -0.94235700 |
| H | 1.22371700  | -2.50461300 | -0.99798400 |
| C | -0.89770100 | -1.76732500 | -0.96253300 |
| H | -1.41202900 | -2.47874300 | -1.61965700 |
| N | -1.39556100 | -2.25268100 | 0.55546700  |
| C | -1.05528300 | -3.66375100 | 0.75574700  |
| H | -0.00213300 | -3.80358700 | 0.50962200  |
| H | -1.22874500 | -3.95238100 | 1.79473300  |
| H | -1.67115700 | -4.29073800 | 0.10209100  |

### TS-M

|   |             |             |             |
|---|-------------|-------------|-------------|
| C | 2.31344400  | 1.77751900  | -0.05040300 |
| C | 1.65398600  | 2.94004400  | 0.08549500  |
| C | 0.19299900  | 2.88759600  | 0.17512400  |
| C | -0.45835500 | 1.72596800  | 0.35935000  |
| C | 0.31763400  | 0.47229900  | 0.64941700  |
| N | 1.68966300  | 0.55169000  | 0.10671800  |
| H | 3.37364900  | 1.73631700  | -0.28888400 |
| H | 2.16473500  | 3.89070500  | 0.02349900  |
| H | -1.54217800 | 1.67288200  | 0.33080900  |
| H | 0.34874600  | 0.29922200  | 1.73327600  |
| C | -0.22325100 | -0.79475500 | -0.05106700 |
| C | -0.54630200 | 4.10562800  | -0.03434300 |
| N | -1.12084800 | 5.09745400  | -0.19564900 |
| C | -1.70621200 | -0.99980700 | -0.04415700 |
| C | -2.42883500 | -0.79285600 | -1.22300000 |
| C | -2.39764500 | -1.31463400 | 1.13071400  |
| C | -3.81460300 | -0.92311800 | -1.23325000 |
| H | -1.88791900 | -0.51570200 | -2.12204300 |
| C | -3.78369600 | -1.43694700 | 1.11900100  |
| H | -1.83094900 | -1.47580400 | 2.04143100  |
| C | -4.49596800 | -1.24553500 | -0.06264800 |
| H | -4.36310500 | -0.76402500 | -2.15624600 |
| H | -4.30925000 | -1.68358100 | 2.03621800  |
| H | -5.57698500 | -1.34188500 | -0.06958700 |
| C | 0.54314300  | -0.95014300 | -1.22088400 |
| H | 0.34898400  | -1.69851000 | -1.97767400 |
| C | 1.88574100  | -0.51062700 | -0.84977600 |
| H | 2.62284200  | -0.26695800 | -1.62455800 |
| N | 2.61687700  | -1.68582900 | 0.01022300  |
| C | 2.89778700  | -2.84624400 | -0.84370000 |
| H | 3.63098100  | -2.57222500 | -1.60942600 |
| H | 3.29533400  | -3.66610800 | -0.24215000 |
| H | 1.96954400  | -3.15802900 | -1.32161700 |

|   |             |             |            |
|---|-------------|-------------|------------|
| C | 3.81397500  | -1.22772000 | 0.72755100 |
| H | 3.53347800  | -0.41992400 | 1.40127000 |
| H | 4.24646000  | -2.05141700 | 1.29961200 |
| H | 4.55582600  | -0.86785900 | 0.00578700 |
| O | 0.35243000  | -1.92324400 | 1.20911300 |
| H | -0.05146900 | -2.75874400 | 0.93711700 |
| H | 1.76894200  | -1.91562000 | 0.68068100 |

**TS-N**

|   |             |             |             |
|---|-------------|-------------|-------------|
| C | 2.80344800  | 1.67638000  | 0.13369900  |
| C | 3.36488500  | 0.42426000  | 0.09297100  |
| C | 2.62402800  | -0.74511000 | -0.07503000 |
| C | 1.15455000  | -0.77129000 | 0.22712900  |
| C | 0.54361000  | 0.55497700  | -0.14294800 |
| N | 1.43563400  | 1.72247900  | -0.23480400 |
| H | 3.31998500  | 2.62137000  | 0.10055800  |
| H | 4.44614000  | 0.35170700  | 0.15404800  |
| H | 0.66215300  | -1.56113000 | -0.35069700 |
| H | 1.28820300  | 1.11379900  | -1.26500600 |
| C | -0.75322300 | 1.03916000  | -0.19634000 |
| C | 3.27480400  | -2.00112600 | -0.18878800 |
| N | 3.78632800  | -3.03697900 | -0.31948000 |
| C | -1.97570100 | 0.22227100  | -0.16320300 |
| C | -3.07821500 | 0.65830500  | 0.58268600  |
| C | -2.06306200 | -0.99308200 | -0.85362500 |
| C | -4.23663300 | -0.10677400 | 0.64238600  |
| H | -3.01226200 | 1.59175900  | 1.13432000  |
| C | -3.22064600 | -1.76167200 | -0.78330300 |
| H | -1.23465300 | -1.31821900 | -1.47543700 |
| C | -4.30948400 | -1.32198300 | -0.03567900 |
| H | -5.08130800 | 0.24133700  | 1.22776600  |
| H | -3.27453100 | -2.70029900 | -1.32479500 |
| H | -5.21231800 | -1.92117000 | 0.01578800  |
| C | -0.68464300 | 2.45902500  | -0.29050100 |
| H | -1.53807200 | 3.11467600  | -0.39931200 |
| C | 0.61749600  | 2.85816200  | -0.31712200 |
| H | 1.07456900  | 3.83039800  | -0.41152200 |
| O | 0.95101700  | -1.00422300 | 1.61693200  |
| H | 0.03293900  | -1.27794700 | 1.74482700  |

**TS-O**

|   |             |             |             |
|---|-------------|-------------|-------------|
| C | -2.93324000 | 1.68243000  | -0.19266800 |
| C | -3.14604600 | 0.22755900  | -0.40970300 |
| C | -2.40962300 | -0.84684200 | -0.05197400 |
| C | -1.06386900 | -0.97990800 | 0.67342800  |
| C | -0.56057100 | 0.37491300  | 1.05380200  |
| N | -1.84556400 | 2.29875800  | -0.16389700 |
| H | -3.88019800 | 2.21574400  | -0.00374700 |
| H | -4.12068100 | 0.00519200  | -0.84021600 |
| H | -1.30336800 | -1.56155600 | 1.58335000  |
| H | -1.29157300 | 0.95679400  | 1.60217100  |
| C | 0.55977700  | 1.00780800  | 0.62914200  |
| C | -3.00091200 | -2.13565500 | -0.32710100 |
| N | -3.48254200 | -3.16877200 | -0.52844800 |
| C | 1.80766300  | 0.31242400  | 0.22753700  |
| C | 2.48597900  | 0.64844000  | -0.94911200 |
| C | 2.35472600  | -0.67313000 | 1.06181100  |
| C | 3.66252800  | -0.00609100 | -1.29749800 |
| H | 2.06619000  | 1.40793100  | -1.60168000 |
| C | 3.52795500  | -1.33423400 | 0.70825700  |
| H | 1.85999300  | -0.89477500 | 2.00471700  |
| C | 4.18395600  | -1.00214900 | -0.47443300 |
| H | 4.16997300  | 0.25432000  | -2.22080600 |
| H | 3.93741300  | -2.09622900 | 1.36369500  |
| H | 5.10037400  | -1.51300900 | -0.75067500 |
| C | 0.47590000  | 2.43031400  | 0.36497900  |
| H | 1.36180800  | 3.05735700  | 0.38483400  |
| C | -0.68306000 | 2.95664100  | -0.13526800 |
| H | -0.68307800 | 3.96925900  | -0.54290300 |
| O | -0.26085300 | -1.72572300 | -0.20323900 |
| H | 0.59973300  | -1.88026800 | 0.20640400  |

**TS-P**

|   |            |             |             |
|---|------------|-------------|-------------|
| C | 2.81304300 | 1.67122500  | 0.15704300  |
| C | 3.35182200 | 0.40194500  | 0.16467800  |
| C | 2.62564600 | -0.76204300 | -0.01516600 |
| C | 1.12601400 | -0.78188400 | -0.03491100 |
| C | 0.58995100 | 0.62417000  | -0.18845800 |
| N | 1.45016300 | 1.74023800  | -0.20552100 |
| H | 3.33706600 | 2.60879900  | 0.23460100  |
| H | 4.42287500 | 0.31952900  | 0.32225700  |
| H | 0.76601100 | -1.40588400 | -0.86463400 |
| H | 1.26348800 | 2.21637500  | -1.29621500 |

|   |             |             |             |
|---|-------------|-------------|-------------|
| C | -0.71117900 | 1.09006100  | -0.16728700 |
| C | 3.27648000  | -2.02279000 | -0.04136900 |
| N | 3.79412600  | -3.06252600 | -0.09432200 |
| C | -1.92870600 | 0.25588800  | -0.13544200 |
| C | -2.97831300 | 0.60376200  | 0.72126400  |
| C | -2.05644200 | -0.88193400 | -0.94003800 |
| C | -4.12836000 | -0.17531300 | 0.77934500  |
| H | -2.87654000 | 1.47673600  | 1.35940600  |
| C | -3.20582700 | -1.66400600 | -0.87562100 |
| H | -1.26529800 | -1.13898100 | -1.63766100 |
| C | -4.24301100 | -1.31347600 | -0.01545000 |
| H | -4.93234500 | 0.10109100  | 1.45339700  |
| H | -3.29307000 | -2.54315700 | -1.50534800 |
| H | -5.13817200 | -1.92428600 | 0.03435200  |
| C | -0.69853700 | 2.50682600  | -0.18980800 |
| H | -1.56474600 | 3.14775200  | -0.26775800 |
| C | 0.60814400  | 2.93403800  | -0.23029800 |
| H | 1.09342800  | 3.89359200  | -0.13988200 |
| O | 0.63397700  | -1.33744600 | 1.18301500  |
| H | -0.23888500 | -1.71478600 | 1.01137400  |

**TS-Q**

|   |             |             |             |
|---|-------------|-------------|-------------|
| C | 2.84773600  | 1.44806700  | 0.35288400  |
| C | 3.31804000  | 0.20711600  | -0.18653000 |
| C | 2.45540800  | -0.83819800 | -0.30001100 |
| C | 1.08613500  | -0.74517400 | 0.34436500  |
| C | 0.63952400  | 0.68668700  | 0.24332100  |
| N | 1.55993700  | 1.66706900  | 0.47864800  |
| H | 3.53185900  | 2.23494500  | 0.64944200  |
| H | 4.35734700  | 0.10615200  | -0.48264900 |
| H | 0.37041300  | -1.38127700 | -0.18043900 |
| H | 1.08762800  | 2.87135900  | -1.22376500 |
| C | -0.66667600 | 1.12751600  | -0.04660300 |
| C | 2.85389000  | -2.07961200 | -0.88684900 |
| N | 3.15621000  | -3.09053900 | -1.36664200 |
| C | -1.85590000 | 0.25631200  | -0.04670500 |
| C | -1.98790400 | -0.81860300 | 0.84425900  |
| C | -2.90150300 | 0.53690800  | -0.93584100 |
| C | -3.13835100 | -1.60018900 | 0.82812400  |
| H | -1.19716600 | -1.02384200 | 1.56026800  |
| C | -4.04984500 | -0.24532200 | -0.94659000 |
| H | -2.79245100 | 1.36529400  | -1.62983600 |

|   |             |             |             |
|---|-------------|-------------|-------------|
| C | -4.16866200 | -1.31803500 | -0.06551400 |
| H | -3.23284500 | -2.42807200 | 1.52305300  |
| H | -4.84947700 | -0.02258200 | -1.64543800 |
| H | -5.06386000 | -1.93145600 | -0.07422600 |
| C | -0.74636400 | 2.52052200  | -0.16773100 |
| H | -1.62461200 | 3.05440100  | 0.18112700  |
| C | 0.48456500  | 3.14720400  | -0.36625600 |
| H | 0.66355700  | 4.15448800  | 0.00470800  |
| O | 1.11608000  | -1.24935000 | 1.67370900  |
| H | 1.78737400  | -0.75151700 | 2.15809200  |

**TS-R**

|   |             |             |             |
|---|-------------|-------------|-------------|
| C | 3.24113800  | 1.39909600  | -0.37147400 |
| C | 3.63891400  | 1.92561000  | -1.76403000 |
| B | 1.49197500  | 1.08740100  | -1.88076200 |
| O | 2.06052500  | 0.66861700  | -0.59959300 |
| O | 2.44395800  | 1.92996100  | -2.49718400 |
| C | 3.20162000  | -1.96971000 | -1.67470200 |
| C | 3.64693000  | -2.35307600 | -0.24834800 |
| B | 1.45873600  | -1.82500800 | -0.29117500 |
| O | 1.78104300  | -1.95690100 | -1.60698100 |
| O | 2.52174400  | -2.03147000 | 0.57487200  |
| C | -0.31953600 | -2.37109600 | 1.31344600  |
| C | -1.62398700 | -2.69059000 | 1.42911600  |
| C | -2.49348700 | -2.38827400 | 0.29259700  |
| C | -2.10798300 | -1.50498400 | -0.65092700 |
| C | -0.84259900 | -0.72705100 | -0.37987100 |
| N | 0.13400300  | -1.61399800 | 0.23903000  |
| H | 0.44041400  | -2.73624600 | 2.00006400  |
| H | -1.98705500 | -3.28446800 | 2.25680900  |
| H | -2.68130600 | -1.34455300 | -1.55653000 |
| H | -0.35204400 | -0.22973000 | -1.34898400 |
| C | -1.13877500 | 0.51840600  | 0.38932100  |
| C | -3.71688400 | -3.13363000 | 0.14927700  |
| N | -4.70413500 | -3.73197000 | 0.06333000  |
| H | 4.01290900  | 0.75861800  | 0.07904100  |
| H | 4.37807000  | 1.25983800  | -2.23596400 |
| H | 4.07418300  | 2.92987500  | -1.71997400 |
| H | 3.04435700  | 2.23456800  | 0.32336300  |
| H | 3.85859600  | -3.42378100 | -0.15627600 |
| H | 4.52162200  | -1.79043700 | 0.08886900  |
| H | 3.52617200  | -2.68887600 | -2.42939200 |

|   |             |             |             |
|---|-------------|-------------|-------------|
| H | 3.55026800  | -0.96966200 | -1.95456600 |
| O | 0.33029700  | 0.72773900  | -2.31013200 |
| C | -2.34756600 | 1.25147300  | -0.06601500 |
| C | -2.52001200 | 1.55317400  | -1.42437200 |
| C | -3.31253800 | 1.64462500  | 0.86665700  |
| C | -3.65758500 | 2.24453600  | -1.82746700 |
| H | -1.73506500 | 1.28826700  | -2.13130100 |
| C | -4.45443700 | 2.31886800  | 0.44792500  |
| H | -3.17852000 | 1.38980100  | 1.91425600  |
| C | -4.62694800 | 2.62082000  | -0.90013300 |
| H | -3.78443000 | 2.49345000  | -2.87606400 |
| H | -5.20995000 | 2.60366800  | 1.17307200  |
| H | -5.51600300 | 3.15070900  | -1.22708100 |
| C | -0.39523200 | 1.13737700  | 1.36961300  |
| H | -0.74756100 | 2.10809000  | 1.70307000  |
| C | 0.85402400  | 0.68307900  | 1.83763100  |
| H | 1.24216800  | -0.27586700 | 1.53398100  |
| N | 1.64448300  | 1.36606300  | 2.63278700  |
| C | 1.30649300  | 2.70758300  | 3.10126200  |
| H | 0.36954200  | 2.69034400  | 3.66271800  |
| H | 2.10431400  | 3.06166600  | 3.75270100  |
| H | 1.20486800  | 3.38759600  | 2.25085300  |
| C | 2.94671100  | 0.82611500  | 3.01274100  |
| H | 3.08494200  | -0.14106300 | 2.52588900  |
| H | 3.73497400  | 1.50973900  | 2.68523400  |
| H | 3.00041900  | 0.70815900  | 4.09854300  |

**TS-S**

|   |             |            |             |
|---|-------------|------------|-------------|
| C | -4.36466700 | 1.42921900 | 0.40884200  |
| C | -4.57886400 | 1.03315400 | -1.07099800 |
| B | -2.38371100 | 0.98290200 | -0.57438100 |
| O | -2.97683400 | 1.21846800 | 0.64520900  |
| O | -3.27145200 | 0.95913200 | -1.62148200 |
| C | -0.10712500 | 0.57959400 | 0.17942800  |
| H | -4.60114700 | 2.48200100 | 0.59405100  |
| H | -5.17106600 | 1.76885600 | -1.62121600 |
| H | -5.06486300 | 0.05526200 | -1.16666300 |
| H | -4.95189600 | 0.81372800 | 1.09727500  |
| O | -1.04768400 | 0.89776200 | -0.80545700 |
| C | 0.93629000  | 1.62067200 | 0.33467800  |
| C | 2.09303300  | 1.33922400 | 1.07497100  |
| C | 0.82801400  | 2.86217700 | -0.29944300 |

|   |             |             |             |
|---|-------------|-------------|-------------|
| C | 3.09762700  | 2.28984700  | 1.20893400  |
| H | 2.21348000  | 0.35737000  | 1.52788500  |
| C | 1.83785600  | 3.81004300  | -0.16755200 |
| H | -0.05283700 | 3.07708700  | -0.89369500 |
| C | 2.97285100  | 3.53124500  | 0.58915600  |
| H | 3.98780300  | 2.05342000  | 1.78295000  |
| H | 1.73645400  | 4.77252900  | -0.65936000 |
| H | 3.76078900  | 4.27090300  | 0.68618800  |
| C | -0.46708700 | -0.23242900 | 1.29237800  |
| H | 0.07815100  | -0.07953400 | 2.21918400  |
| C | -0.78949200 | -1.67798000 | 0.95058200  |
| H | -0.79212400 | -2.32370800 | 1.84719400  |
| N | -2.04227600 | -1.81398400 | 0.21221500  |
| C | -3.14688000 | -1.72343500 | 1.16269800  |
| H | -3.04714600 | -0.81534200 | 1.75941200  |
| H | -4.09349800 | -1.68090500 | 0.61539200  |
| H | -3.17648300 | -2.59934100 | 1.83558100  |
| C | -2.12433300 | -3.07192800 | -0.52037900 |
| H | -2.01833300 | -3.94989000 | 0.14208100  |
| H | -3.10054100 | -3.12529500 | -1.00821000 |
| H | -1.34914700 | -3.12132400 | -1.28551300 |
| C | 1.41649100  | -2.69196300 | 0.78056000  |
| C | 2.71415700  | -2.49176700 | 0.45867900  |
| C | 3.02202800  | -1.54255600 | -0.58585500 |
| C | 2.01279400  | -0.87789400 | -1.22391100 |
| C | 0.65369300  | -1.03532800 | -0.81139900 |
| N | 0.37457600  | -2.06544300 | 0.13092800  |
| H | 1.11888100  | -3.38262700 | 1.56282900  |
| H | 3.50101800  | -3.04183100 | 0.95609900  |
| H | 2.22851100  | -0.16331800 | -2.01035600 |
| C | 4.39013300  | -1.30724200 | -0.94795900 |
| N | 5.50003900  | -1.12676600 | -1.22564800 |
| H | -0.12518100 | -0.89802200 | -1.55829400 |

**TS-T**

|   |             |             |             |
|---|-------------|-------------|-------------|
| C | 4.63268500  | -0.48815800 | -1.13047700 |
| C | 4.26128100  | -0.83667700 | 0.32702900  |
| B | 2.38459700  | -0.60143800 | -0.92626400 |
| O | 3.41005800  | -0.58050600 | -1.84957500 |
| O | 2.84436700  | -0.70848700 | 0.37998200  |
| C | -3.10771000 | -1.55380500 | -0.56964200 |
| C | -4.07206900 | -0.63393800 | -0.78826000 |

|   |             |             |             |   |             |             |             |
|---|-------------|-------------|-------------|---|-------------|-------------|-------------|
| C | -3.77755500 | 0.74616900  | -0.40566000 | C | -4.64831200 | -0.65251800 | -1.31169300 |
| C | -2.51678000 | 1.15763800  | -0.16475100 | C | -4.45607000 | -0.60184500 | 0.21972500  |
| C | -1.40420800 | 0.20246900  | -0.52075700 | B | -2.48329200 | -0.28012400 | -0.82453000 |
| N | -1.81934600 | -1.17939700 | -0.27295500 | O | -3.39713100 | -0.23436800 | -1.84729200 |
| H | -3.28340300 | -2.62600200 | -0.58224200 | O | -3.04162600 | -0.56374400 | 0.40144500  |
| H | -5.07400800 | -0.91845200 | -1.07728100 | C | 2.55821900  | 2.31037400  | 0.40078800  |
| H | -2.30040200 | 2.13597500  | 0.25158200  | C | 3.62504300  | 1.79861400  | -0.25337100 |
| H | -1.13694900 | 0.31596200  | -1.58361500 | C | 3.51453800  | 0.42373400  | -0.73236700 |
| C | -0.14691100 | 0.32428600  | 0.31901600  | C | 2.32759700  | -0.21535000 | -0.80504700 |
| C | -4.88273900 | 1.63742000  | -0.15920600 | C | 1.08091900  | 0.58814400  | -0.56489100 |
| N | -5.77874600 | 2.34559000  | 0.02814600  | N | 1.37901400  | 1.62134900  | 0.42973100  |
| H | 5.02498300  | 0.53131000  | -1.21623300 | H | 2.57745800  | 3.24361400  | 0.95547300  |
| H | 4.71825500  | -0.15723000 | 1.05165800  | H | 4.56610300  | 2.32652000  | -0.30321700 |
| H | 4.53756800  | -1.86482100 | 0.58590100  | H | 2.25636500  | -1.26297600 | -1.07544400 |
| H | 5.36423800  | -1.18038400 | -1.55488800 | H | 0.75431600  | 1.05853100  | -1.50697400 |
| O | 1.08548200  | -0.52717800 | -1.29150300 | C | -0.20037800 | -0.12871300 | 0.00069900  |
| C | 0.58508000  | 1.59480400  | 0.43963300  | C | 4.72798800  | -0.28756400 | -1.04563400 |
| C | 1.44072300  | 1.83840500  | 1.51997700  | N | 5.71107600  | -0.84285100 | -1.29964400 |
| C | 0.43744600  | 2.57959700  | -0.54514400 | H | -4.86601500 | -1.66728400 | -1.66169000 |
| C | 2.13536100  | 3.03805300  | 1.61021100  | H | -4.86720500 | -1.47614600 | 0.72919900  |
| H | 1.56023800  | 1.08396900  | 2.29040100  | H | -4.89484300 | 0.30112000  | 0.65800600  |
| C | 1.13094600  | 3.78039200  | -0.45177000 | H | -5.43972700 | 0.01494200  | -1.66048500 |
| H | -0.20949400 | 2.39601400  | -1.39772700 | O | -1.16531900 | -0.05831100 | -1.05739100 |
| C | 1.98159500  | 4.01241700  | 0.62567700  | C | 0.04558500  | -1.58537700 | 0.37676700  |
| H | 2.79390400  | 3.21681500  | 2.45399600  | C | 0.74117100  | -1.88002200 | 1.55170300  |
| H | 1.00892500  | 4.53362700  | -1.22283500 | C | -0.33608100 | -2.62808000 | -0.46739400 |
| H | 2.52108900  | 4.95102400  | 0.70059500  | C | 1.03420300  | -3.19742000 | 1.88659900  |
| C | 0.03087700  | -0.81667300 | 1.04505000  | H | 1.05233500  | -1.06783600 | 2.20310200  |
| H | 0.85922900  | -1.00582200 | 1.71648500  | C | -0.04412200 | -3.94784900 | -0.12937800 |
| C | -1.08607700 | -1.80888500 | 0.82235100  | H | -0.85098100 | -2.40731000 | -1.39672100 |
| H | -1.69923200 | -1.83947300 | 1.74089100  | C | 0.63861300  | -4.23658900 | 1.04768000  |
| N | -0.76466200 | -3.19043000 | 0.52780600  | H | 1.57386300  | -3.41263200 | 2.80316700  |
| C | 0.21448800  | -3.36387500 | -0.53548700 | H | -0.34914800 | -4.75131900 | -0.79231100 |
| H | 1.23544200  | -3.09839000 | -0.21131500 | H | 0.86688400  | -5.26504100 | 1.30798300  |
| H | 0.21061700  | -4.41213100 | -0.84739800 | C | -0.55035200 | 0.72194500  | 1.19450500  |
| H | -0.04750600 | -2.73104800 | -1.38326500 | H | -1.37560200 | 0.48974000  | 1.85072400  |
| C | -0.39977300 | -3.93841500 | 1.71744000  | C | 0.33294900  | 1.76662900  | 1.34159800  |
| H | -1.17875700 | -3.83785000 | 2.47862000  | H | 0.53186900  | 2.29689100  | 2.26544500  |
| H | -0.30976800 | -4.99686600 | 1.45908100  | N | -0.64773500 | 3.40902600  | 0.69219900  |
| H | 0.56211300  | -3.61735000 | 2.15532100  | C | -0.79066400 | 3.33804000  | -0.74638600 |
|   |             |             |             | H | -1.42541000 | 2.50780500  | -1.09057700 |
|   |             |             |             | H | -1.25183200 | 4.27327800  | -1.09507500 |
|   |             |             |             | H | 0.19491900  | 3.25899900  | -1.21277600 |
|   |             |             |             | C | -1.94090900 | 3.43033500  | 1.34343400  |

TS-U

|   |             |            |            |
|---|-------------|------------|------------|
| H | -1.82038900 | 3.27494600 | 2.42041800 |
| H | -2.39088200 | 4.42193800 | 1.19650800 |
| H | -2.64913100 | 2.68262400 | 0.95375200 |

|   |             |             |             |
|---|-------------|-------------|-------------|
| H | -1.31453700 | -2.64785700 | 2.54620100  |
| O | 2.55004800  | -2.58742600 | -1.10857200 |
| H | 2.89502500  | -3.09189700 | -0.36095700 |
| H | 1.38286300  | -2.28325600 | -1.03585800 |

**TS-V**

|   |             |             |             |
|---|-------------|-------------|-------------|
| C | 4.08420300  | 0.58540200  | -0.84743200 |
| C | 3.71075400  | 0.32679000  | 0.62852900  |
| B | 2.53316200  | -1.07976100 | -0.73435200 |
| O | 3.17053700  | -0.18920100 | -1.60439900 |
| O | 2.95680700  | -0.87784600 | 0.59884100  |
| C | -3.36470100 | -1.73633500 | 0.91003000  |
| C | -4.17088100 | -0.98387700 | 0.13207000  |
| C | -3.54425400 | 0.04722100  | -0.69135400 |
| C | -2.21006700 | 0.09853300  | -0.88122800 |
| C | -1.36584700 | -1.03198000 | -0.37365300 |
| N | -2.00552400 | -1.64176500 | 0.79629300  |
| H | -3.73473900 | -2.41230100 | 1.67470800  |
| H | -5.24656300 | -1.05529100 | 0.19992400  |
| H | -1.74077000 | 0.91148400  | -1.42361900 |
| H | -1.25324300 | -1.80645600 | -1.15435900 |
| C | 0.09405100  | -0.72887300 | 0.11274900  |
| C | -4.38668100 | 1.07859300  | -1.24220100 |
| N | -5.08228100 | 1.89155700  | -1.68285700 |
| H | 3.98261400  | 1.64297700  | -1.11374200 |
| H | 3.09494500  | 1.13763700  | 1.03673800  |
| H | 4.58871400  | 0.19373600  | 1.26761100  |
| H | 5.11097200  | 0.26753800  | -1.06730100 |
| O | 0.96418700  | -1.13486300 | -0.94399600 |
| C | 0.34761800  | 0.74602300  | 0.40263200  |
| C | 0.04728700  | 1.28530000  | 1.65314200  |
| C | 0.83707200  | 1.58535100  | -0.60421900 |
| C | 0.25551600  | 2.63900900  | 1.90548400  |
| H | -0.33814300 | 0.63986200  | 2.43611500  |
| C | 1.04475000  | 2.93806000  | -0.34812100 |
| H | 1.08773400  | 1.16832200  | -1.57422800 |
| C | 0.75864600  | 3.46835200  | 0.90745100  |
| H | 0.02553900  | 3.04448500  | 2.88564500  |
| H | 1.43229500  | 3.57825000  | -1.13456200 |
| H | 0.92405800  | 4.52238300  | 1.10577900  |
| C | 0.19023600  | -1.61359100 | 1.34380600  |
| H | 1.10893700  | -1.73158400 | 1.89929700  |
| C | -1.02595500 | -2.05616200 | 1.68486800  |

**TS-W**

|   |             |             |             |
|---|-------------|-------------|-------------|
| C | 2.97202000  | -1.24340300 | -0.43659400 |
| C | 3.41951300  | 0.01564000  | -0.29680700 |
| C | 2.47611200  | 1.09400500  | 0.00425100  |
| C | 1.18276400  | 0.80714100  | 0.29948300  |
| C | 0.76054000  | -0.56914500 | 0.42395300  |
| N | 1.62906900  | -1.53134900 | -0.23083500 |
| H | 3.59704800  | -2.07517900 | -0.74106200 |
| H | 4.46636000  | 0.24252700  | -0.44874700 |
| H | 0.46453800  | 1.59255500  | 0.51644700  |
| H | 0.42495700  | -0.97949200 | 1.69459500  |
| C | -0.62944000 | -1.12554500 | 0.26804700  |
| C | 2.93315800  | 2.45189600  | -0.02881800 |
| N | 3.31780500  | 3.54428600  | -0.05990300 |
| O | -0.70231700 | -1.48146700 | 2.00477900  |
| C | -1.80759300 | -0.23068500 | 0.05691000  |
| C | -2.33534000 | -0.13693000 | -1.23417200 |
| C | -2.32797500 | 0.58174300  | 1.06868800  |
| C | -3.37728600 | 0.74361000  | -1.50695600 |
| H | -1.91504200 | -0.75128000 | -2.02475400 |
| C | -3.36262700 | 1.46839100  | 0.78850400  |
| H | -1.93520500 | 0.48964800  | 2.07447500  |
| C | -3.89207500 | 1.55079500  | -0.49689100 |
| H | -3.78215000 | 0.80297700  | -2.51210200 |
| H | -3.76217200 | 2.09227600  | 1.58160300  |
| H | -4.70163600 | 2.24138800  | -0.70971200 |
| C | -0.45208800 | -2.35947800 | -0.46871900 |
| H | -1.25500000 | -2.99588500 | -0.80968700 |
| C | 0.88813000  | -2.55827300 | -0.69554000 |
| H | 1.37143100  | -3.38954100 | -1.19456000 |
| H | -0.66957600 | -2.44739100 | 2.09842200  |

**TS-X**

|   |            |            |            |
|---|------------|------------|------------|
| C | 2.70925500 | 0.64848100 | 0.80895000 |
| C | 2.65289900 | 1.97377800 | 0.43879600 |



|   |             |             |             |   |             |             |             |
|---|-------------|-------------|-------------|---|-------------|-------------|-------------|
| C | 1.41524300  | 2.45382900  | -0.07989000 | H | 3.55661100  | -0.85453500 | 1.07041200  |
| C | 0.32170200  | 1.61322700  | -0.14965500 | H | 4.17095700  | 1.45116100  | 0.28401700  |
| C | 0.44033300  | 0.27984800  | 0.29678300  | H | -0.02860700 | 2.26125800  | -0.36138900 |
| N | 1.66346400  | -0.18296900 | 0.72670700  | C | -0.73479300 | -0.40655400 | 0.59271300  |
| H | 3.63358100  | 0.22175700  | 1.19217900  | C | 2.41776700  | 3.32861500  | -0.56341300 |
| H | 3.51876600  | 2.61837800  | 0.50856600  | N | 2.69113200  | 4.38302100  | -0.95799800 |
| H | -0.61777400 | 1.96638600  | -0.55937500 | C | -2.08810700 | 0.07106200  | 0.27533100  |
| C | -0.59596700 | -0.70370500 | 0.36211900  | C | -2.50698800 | 1.36098100  | 0.62430900  |
| C | 1.30544100  | 3.80892800  | -0.54078600 | C | -2.99034000 | -0.77599400 | -0.37956100 |
| N | 1.22680700  | 4.90360600  | -0.91165900 | C | -3.79047500 | 1.79600100  | 0.31127100  |
| C | -2.02665700 | -0.40159200 | 0.18053500  | H | -1.83076400 | 2.01149600  | 1.17171200  |
| C | -2.61217600 | 0.77266600  | 0.67722900  | C | -4.27536700 | -0.34321500 | -0.68331500 |
| C | -2.85322300 | -1.33528300 | -0.46001800 | H | -2.66414600 | -1.77186600 | -0.66718500 |
| C | -3.97129400 | 1.01416100  | 0.51279100  | C | -4.67819100 | 0.94654700  | -0.34350600 |
| H | -2.00021000 | 1.48369900  | 1.22383600  | H | -4.10125700 | 2.79756700  | 0.59078000  |
| C | -4.21322600 | -1.09593300 | -0.61876100 | H | -4.96151700 | -1.01024600 | -1.19552100 |
| H | -2.40828600 | -2.24846700 | -0.84521500 | H | -5.67968300 | 1.28643600  | -0.58603100 |
| C | -4.77731300 | 0.08350300  | -0.13871100 | C | -0.37514900 | -1.67508300 | 1.04544900  |
| H | -4.40459600 | 1.92760600  | 0.90782800  | H | -1.05800800 | -2.47953000 | 1.28166300  |
| H | -4.83372700 | -1.82911100 | -1.12465900 | C | 1.03192500  | -1.76131000 | 1.13545300  |
| H | -5.83808600 | 0.27358400  | -0.26598500 | H | 1.60863300  | -2.42888200 | 1.76043500  |
| C | -0.15716100 | -1.95708900 | 0.76504900  | N | 1.78403300  | -2.74842000 | -0.51623700 |
| H | -0.81153100 | -2.64621700 | 1.28907000  | C | 1.35127000  | -1.98109100 | -1.66331800 |
| C | 1.26825500  | -2.20163500 | 0.78018700  | H | 1.85222700  | -1.00879600 | -1.68539600 |
| H | 1.73699800  | -2.54304100 | 1.70603300  | H | 1.62765800  | -2.51910200 | -2.58209100 |
| N | 1.96163600  | -2.58348000 | -0.31487700 | H | 0.25954400  | -1.82135600 | -1.69771500 |
| C | 1.46858300  | -2.23289900 | -1.63543000 | C | 1.10673900  | -4.02793600 | -0.48618600 |
| H | 0.39585800  | -2.42125200 | -1.68112200 | H | 1.52340900  | -4.67516000 | -1.27108100 |
| H | 1.65279800  | -1.17153500 | -1.85263900 | H | 1.27763700  | -4.52347100 | 0.47539600  |
| H | 1.98416500  | -2.84638100 | -2.37712300 | H | 0.02014300  | -3.96111900 | -0.66183900 |
| C | 3.40661900  | -2.66637200 | -0.21103000 |   |             |             |             |
| H | 3.86845800  | -1.69249200 | -0.42239500 |   |             |             |             |
| H | 3.68520600  | -2.97814800 | 0.79801500  |   |             |             |             |
| H | 3.78714600  | -3.39834600 | -0.92714900 |   |             |             |             |

**TS-Y**

|   |            |             |             |
|---|------------|-------------|-------------|
| C | 2.82684100 | -0.10636900 | 0.78806700  |
| C | 3.13713100 | 1.13739600  | 0.34403200  |
| C | 2.08874600 | 2.02394800  | -0.07150200 |
| C | 0.77067300 | 1.61560300  | -0.01606500 |
| C | 0.46009300 | 0.33983100  | 0.47071200  |
| N | 1.51290700 | -0.49295100 | 0.87295200  |

**TS-Z**

|   |             |             |             |
|---|-------------|-------------|-------------|
| C | 2.91550000  | -1.74057000 | 2.04845000  |
| C | 4.01106800  | -0.72364300 | 1.68671800  |
| B | 2.00461200  | -0.01484600 | 0.96353000  |
| O | 1.70120800  | -1.02905800 | 1.82628100  |
| O | 3.35802900  | 0.17668700  | 0.79018400  |
| C | 1.46332500  | 2.19039600  | 0.14482600  |
| C | 0.60787500  | 3.21352400  | -0.02035800 |
| C | -0.81214900 | 2.92589400  | 0.05275500  |
| C | -1.25052300 | 1.64420400  | 0.16163800  |
| C | -0.32851900 | 0.53071900  | 0.17735000  |

|              |             |             |             |              |             |             |             |
|--------------|-------------|-------------|-------------|--------------|-------------|-------------|-------------|
| N            | 1.03670600  | 0.88409200  | 0.37403100  | C            | 1.75245600  | 1.53218900  | -1.13312400 |
| H            | 2.53973100  | 2.31996300  | 0.15226500  | C            | 1.19115800  | 2.75386000  | -1.02642300 |
| H            | 0.96312600  | 4.22144200  | -0.18400400 | C            | -0.10739100 | 2.93462100  | -0.44891300 |
| H            | -2.31182500 | 1.43311700  | 0.13633900  | C            | -0.82018600 | 1.79400400  | -0.12157700 |
| C            | -0.72493400 | -0.76183000 | -0.09642000 | C            | -0.27500100 | 0.52429000  | -0.28985000 |
| C            | -1.75742800 | 4.00207400  | -0.04300100 | N            | 1.10650400  | 0.34786800  | -0.66817700 |
| N            | -2.50607100 | 4.88242300  | -0.12019900 | H            | 2.76634200  | 1.39196800  | -1.48380200 |
| H            | 4.35743400  | -0.16717000 | 2.56433600  | H            | 1.75750400  | 3.61712300  | -1.35753000 |
| H            | 4.87202800  | -1.17584600 | 1.18913300  | H            | -1.85232800 | 1.86258600  | 0.20654700  |
| H            | 2.96171800  | -2.07678300 | 3.08593800  | C            | -1.00959000 | -0.66045700 | -0.54560300 |
| H            | 2.93786900  | -2.61398700 | 1.38530200  | C            | -0.66763400 | 4.23469200  | -0.29156700 |
| C            | -2.15500300 | -1.14400100 | 0.04887600  | N            | -1.11789400 | 5.29669100  | -0.16137400 |
| C            | -2.90090800 | -0.79626700 | 1.18361800  | H            | 3.59640100  | 1.15034600  | 2.47315400  |
| C            | -2.77265000 | -1.92651400 | -0.93535900 | H            | 3.89782800  | -0.60244500 | 2.58045000  |
| C            | -4.22854500 | -1.18889200 | 1.31356800  | H            | 1.20557300  | 0.85993400  | 2.60519000  |
| H            | -2.41992800 | -0.22737000 | 1.97474000  | H            | 1.67082800  | -0.58064100 | 3.55205300  |
| C            | -4.09854600 | -2.32436500 | -0.80441700 | C            | -2.41922000 | -0.82178100 | -0.13284400 |
| H            | -2.19893300 | -2.21262300 | -1.81261900 | C            | -2.79419100 | -0.52893100 | 1.18322200  |
| C            | -4.83358400 | -1.95340900 | 0.31887200  | C            | -3.38938800 | -1.28326100 | -1.02823100 |
| H            | -4.78763000 | -0.90990400 | 2.20118100  | C            | -4.11313100 | -0.69280300 | 1.59358400  |
| H            | -4.56106400 | -2.92201300 | -1.58382900 | H            | -2.03304600 | -0.18730200 | 1.87930200  |
| H            | -5.86812000 | -2.26438800 | 0.42214500  | C            | -4.70690300 | -1.44672400 | -0.61656000 |
| C            | 0.15563500  | -1.85584800 | -0.49779700 | H            | -3.11023300 | -1.49296400 | -2.05658700 |
| H            | -0.17247700 | -2.84265700 | -0.18316200 | C            | -5.07257400 | -1.15242400 | 0.69531100  |
| C            | 1.31074600  | -1.84273100 | -1.20726400 | H            | -4.39063000 | -0.46417400 | 2.61763900  |
| H            | 1.86372500  | -2.77839500 | -1.29228400 | H            | -5.45233500 | -1.79780700 | -1.32305200 |
| N            | 1.92013100  | -0.76705800 | -1.81837000 | H            | -6.10188900 | -1.27864200 | 1.01503900  |
| C            | 1.15110200  | 0.21221100  | -2.56073700 | C            | -0.34235800 | -1.52677100 | -1.38985800 |
| H            | 0.08877400  | 0.08493600  | -2.35801100 | H            | -0.86588100 | -2.26655000 | -1.98493400 |
| H            | 1.43775400  | 1.23543500  | -2.28824600 | C            | 1.03608200  | -1.19907000 | -1.62634600 |
| H            | 1.32141900  | 0.08134400  | -3.63872300 | H            | 1.41580300  | -1.26530400 | -2.65244100 |
| C            | 3.29971400  | -0.88632700 | -2.23356400 | N            | 2.09204300  | -1.73331300 | -0.68547900 |
| H            | 3.79668500  | -1.66180600 | -1.64724800 | C            | 3.41881700  | -1.72911900 | -1.34050000 |
| H            | 3.39045700  | -1.13087100 | -3.30263300 | H            | 3.62200600  | -0.73506600 | -1.73984800 |
| H            | 3.82387800  | 0.05681800  | -2.04474500 | H            | 4.18110000  | -1.96566700 | -0.59912700 |
|              |             |             |             | H            | 3.42499200  | -2.46385800 | -2.15044600 |
|              |             |             |             | C            | 1.79517900  | -3.07443500 | -0.13623200 |
|              |             |             |             | H            | 0.82346300  | -3.04315700 | 0.35098600  |
|              |             |             |             | H            | 1.79491800  | -3.81058100 | -0.94462000 |
|              |             |             |             | H            | 2.56588900  | -3.31817300 | 0.59747800  |
| <b>TS-AA</b> |             |             |             | <b>TS-AB</b> |             |             |             |
| C            | 1.77168000  | -0.08200500 | 2.58474400  |              |             |             |             |
| C            | 3.22920700  | 0.16592500  | 2.17062900  |              |             |             |             |
| B            | 1.97444100  | -0.52980100 | 0.39585600  |              |             |             |             |
| O            | 1.26986800  | -0.92049700 | 1.55364100  |              |             |             |             |
| O            | 3.20323600  | 0.07173000  | 0.75152400  |              |             |             |             |

|   |             |             |             |              |             |             |             |
|---|-------------|-------------|-------------|--------------|-------------|-------------|-------------|
| C | 1.53438500  | 0.46471800  | 2.33614900  | H            | 1.65718500  | -3.62289200 | 1.52436600  |
| C | 2.94021100  | 0.69825800  | 1.71376300  |              |             |             |             |
| B | 1.85811400  | -0.93501900 | 0.61960900  |              |             |             |             |
| O | 1.02738700  | -0.70620900 | 1.69533500  | <b>TS-AC</b> |             |             |             |
| O | 3.09191000  | -0.32804200 | 0.73080700  |              |             |             |             |
| C | 1.88717500  | 0.67323800  | -1.68219200 | C            | -2.83753900 | -1.07262000 | -2.10383600 |
| C | 1.85424300  | 1.99778400  | -1.47633900 | C            | -3.78786100 | -0.01989400 | -1.49266700 |
| C | 0.80918800  | 2.60805400  | -0.67305100 | B            | -1.68237000 | 0.80054600  | -1.59169700 |
| C | -0.28986200 | 1.82803300  | -0.33258300 | O            | -1.62055200 | -0.37404200 | -2.31956400 |
| C | -0.28152900 | 0.46145300  | -0.56572500 | O            | -2.92897000 | 1.01789000  | -1.03864500 |
| N | 0.98519100  | -0.16700200 | -0.94804800 | C            | 0.03783800  | 4.72350400  | -0.01345900 |
| H | 2.61230800  | 0.16593600  | -2.30629200 | C            | -0.61160200 | 3.98818200  | 1.17408200  |
| H | 2.58604100  | 2.63062200  | -1.96505700 | B            | -0.19674000 | 2.50343900  | -0.51113900 |
| H | -1.19398300 | 2.28769300  | 0.05453800  | O            | 0.46586100  | 3.69247500  | -0.88239700 |
| C | -1.25328400 | -0.54288600 | -0.60256200 | O            | -0.97426500 | 2.72485500  | 0.64504200  |
| C | 0.83426200  | 4.00303400  | -0.40108900 | C            | 2.43715800  | 2.17819400  | 0.67062200  |
| N | 0.87004500  | 5.14052200  | -0.16584100 | C            | 3.67074300  | 1.66754000  | 0.71850900  |
| H | 3.00708000  | 1.67779900  | 1.23039200  | C            | 3.92898200  | 0.36753200  | 0.09615000  |
| H | 3.74612800  | 0.60377800  | 2.44653900  | C            | 2.87848000  | -0.45329400 | -0.19161400 |
| H | 0.86556000  | 1.30709200  | 2.13071500  | C            | 1.53806200  | 0.03231100  | 0.02720500  |
| H | 1.57174700  | 0.28835900  | 3.41414400  | N            | 1.41881600  | 1.48693700  | -0.09986700 |
| C | -2.65417200 | -0.36423800 | -0.18489800 | H            | 2.14448900  | 3.12098700  | 1.11573000  |
| C | -2.95698700 | 0.31295000  | 1.00193000  | H            | 4.47171000  | 2.17455800  | 1.24388600  |
| C | -3.69823400 | -0.88519300 | -0.95591600 | H            | 3.04543400  | -1.48480000 | -0.48427900 |
| C | -4.27912300 | 0.47868700  | 1.39983400  | H            | 1.67225100  | 1.65839600  | -1.08173900 |
| H | -2.14280800 | 0.68085700  | 1.61991100  | C            | 0.49263500  | -0.78086000 | 0.36202400  |
| C | -5.01922700 | -0.71785900 | -0.55651500 | C            | 5.27933600  | -0.08476600 | -0.05866300 |
| H | -3.46533200 | -1.40425100 | -1.88102400 | N            | 6.37688700  | -0.43691300 | -0.17704300 |
| C | -5.31340400 | -0.03338900 | 0.62073300  | H            | -2.65463300 | -1.90622300 | -1.41260000 |
| H | -4.50173300 | 1.00293900  | 2.32364700  | H            | -4.36456100 | -0.41383800 | -0.65050600 |
| H | -5.82184400 | -1.11821100 | -1.16772500 | H            | -4.47976400 | 0.38651800  | -2.23897700 |
| H | -6.34500200 | 0.09765600  | 0.93103200  | H            | -3.20721700 | -1.47801100 | -3.04924500 |
| C | -0.70122500 | -1.71613000 | -1.12020500 | H            | 0.09365200  | 3.85863700  | 2.00693300  |
| H | -1.24117100 | -2.62227700 | -1.35312000 | H            | -1.50080600 | 4.49805000  | 1.55571800  |
| C | 0.70392500  | -1.52789300 | -1.33495300 | H            | 0.88903500  | 5.34256300  | 0.28945100  |
| H | 1.21823000  | -1.91103200 | -2.22387000 | H            | -0.68800100 | 5.36445900  | -0.52926800 |
| N | 1.74178700  | -2.28965000 | -0.10958400 | O            | -0.63241200 | 1.63718600  | -1.51677600 |
| C | 3.00129100  | -2.75435200 | -0.70228400 | C            | 0.65671700  | -2.25441900 | 0.16272800  |
| H | 3.48103100  | -1.92892000 | -1.23195400 | C            | 1.03925700  | -3.08615100 | 1.21682000  |
| H | 3.68627900  | -3.10268000 | 0.07499200  | C            | 0.37428400  | -2.80660000 | -1.08982200 |
| H | 2.79505900  | -3.57264500 | -1.39926700 | C            | 1.15288500  | -4.45912500 | 1.01787400  |
| C | 1.05894000  | -3.33920100 | 0.65479600  | H            | 1.24904500  | -2.64854400 | 2.18875700  |
| H | 0.09431000  | -2.95471400 | 0.98726100  | C            | 0.48366900  | -4.18199700 | -1.28253900 |
| H | 0.90735900  | -4.21350500 | 0.01454700  | H            | 0.06377200  | -2.14605400 | -1.89607300 |

|   |             |             |             |
|---|-------------|-------------|-------------|
| C | 0.87402400  | -5.00837200 | -0.23161100 |
| H | 1.46145300  | -5.09951500 | 1.83796800  |
| H | 0.26698000  | -4.60805900 | -2.25714200 |
| H | 0.96340100  | -6.07890600 | -0.38617300 |
| C | -0.74581700 | -0.31264500 | 0.91509100  |
| H | -0.81799900 | 0.73358700  | 1.18156300  |
| C | -1.80486300 | -1.14726100 | 1.12613000  |
| H | -1.71318300 | -2.20668200 | 0.89283300  |
| N | -3.02175600 | -0.78459800 | 1.59349500  |
| C | -3.25318200 | 0.57484700  | 2.05131500  |
| H | -2.85195400 | 1.28613200  | 1.32748200  |
| H | -4.33029100 | 0.73251000  | 2.14277900  |
| H | -2.78566700 | 0.74729400  | 3.03087200  |
| C | -3.94502000 | -1.79747500 | 2.06330400  |
| H | -3.71700100 | -2.75261200 | 1.58566900  |
| H | -3.88824600 | -1.92978000 | 3.15220600  |
| H | -4.97038100 | -1.51528000 | 1.80509600  |

**TS-AD**

|   |             |             |             |
|---|-------------|-------------|-------------|
| C | 2.36618400  | 1.46496900  | -0.32300600 |
| C | 1.86317100  | 2.71051600  | -0.39084600 |
| C | 0.49102100  | 2.95369200  | 0.00896300  |
| C | -0.36465900 | 1.85395400  | 0.09724900  |
| C | 0.17395600  | 0.57329300  | 0.13054700  |
| N | 1.60688000  | 0.47640100  | 0.41295700  |
| H | 3.31420900  | 1.15132300  | -0.74897800 |
| H | 2.42742000  | 3.51682700  | -0.84990800 |
| H | -1.43870800 | 1.99739100  | 0.02610700  |
| H | 1.74489600  | 0.62788300  | 1.42002700  |
| C | -0.43224400 | -0.69086600 | -0.07393100 |
| C | -0.02564600 | 4.28064500  | 0.00670600  |
| N | -0.43785800 | 5.36666300  | 0.01453000  |
| C | -1.90097600 | -0.87797400 | -0.05824100 |
| C | -2.50454900 | -1.73871300 | -0.98148200 |
| C | -2.70302800 | -0.23468500 | 0.89166000  |
| C | -3.87982500 | -1.94355400 | -0.96382400 |
| H | -1.88342400 | -2.22976700 | -1.72446200 |
| C | -4.07785600 | -0.44241600 | 0.91076500  |
| H | -2.23658700 | 0.41541200  | 1.62536400  |
| C | -4.67007100 | -1.29491800 | -0.01812600 |
| H | -4.33623300 | -2.60607100 | -1.69223200 |
| H | -4.68749200 | 0.05924700  | 1.65523700  |

|   |             |             |             |
|---|-------------|-------------|-------------|
| H | -5.74357000 | -1.45318800 | -0.00446600 |
| C | 0.42890200  | -1.75541500 | -0.21863300 |
| H | 0.11432800  | -2.79005800 | -0.17844000 |
| C | 1.81634300  | -1.41428500 | -0.44234300 |
| H | 2.07514800  | -0.81288100 | -1.32206200 |
| N | 2.83241100  | -2.15531700 | 0.00129400  |
| C | 4.19274800  | -1.88388100 | -0.42936200 |
| H | 4.17747500  | -1.30922800 | -1.35614200 |
| H | 4.73340300  | -1.31535200 | 0.33696200  |
| H | 4.72130300  | -2.82503100 | -0.60396300 |
| C | 2.71590800  | -2.99683600 | 1.18105200  |
| H | 1.68032700  | -3.01001000 | 1.51605100  |
| H | 3.04427300  | -4.01489700 | 0.95304500  |
| H | 3.34693700  | -2.59697200 | 1.98349900  |

**TS-AE**

|   |             |             |             |
|---|-------------|-------------|-------------|
| C | 2.61367400  | 0.76081300  | -0.73808900 |
| C | 2.45685200  | 2.08627600  | -0.58379100 |
| C | 1.27064800  | 2.64932900  | 0.01423400  |
| C | 0.18569900  | 1.79017500  | 0.19502500  |
| C | 0.31923200  | 0.42751500  | 0.03642200  |
| N | 1.66877500  | -0.14704400 | -0.12249000 |
| H | 3.45616500  | 0.29984000  | -1.23865600 |
| H | 3.21985900  | 2.75144600  | -0.97357400 |
| H | -0.80421900 | 2.19520100  | 0.38178500  |
| H | 2.14463400  | -0.98629100 | 0.85155800  |
| C | -0.60864600 | -0.60604000 | -0.24891300 |
| C | 1.14784200  | 4.04974800  | 0.20523200  |
| N | 1.05545900  | 5.19755000  | 0.36715500  |
| C | -2.07129300 | -0.45406500 | -0.12356500 |
| C | -2.92448600 | -0.99045200 | -1.09388900 |
| C | -2.62778100 | 0.20832100  | 0.97629300  |
| C | -4.30301500 | -0.86299000 | -0.96961100 |
| H | -2.49534600 | -1.48813600 | -1.95839000 |
| C | -4.00733100 | 0.33540600  | 1.09920400  |
| H | -1.96886300 | 0.60763000  | 1.74157800  |
| C | -4.84844600 | -0.19925700 | 0.12692700  |
| H | -4.95404100 | -1.27578900 | -1.73366400 |
| H | -4.42617000 | 0.84931000  | 1.95846000  |
| H | -5.92474500 | -0.09783100 | 0.22228300  |
| C | 0.03048300  | -1.73252800 | -0.71116000 |
| H | -0.44627200 | -2.61772700 | -1.10773800 |

|   |            |             |             |
|---|------------|-------------|-------------|
| C | 1.49055400 | -1.54078200 | -0.67455600 |
| H | 2.06106300 | -1.75333600 | -1.58926700 |
| N | 2.23797700 | -2.21176300 | 0.50829700  |
| C | 3.61207100 | -2.61465700 | 0.17482300  |
| H | 4.12553100 | -1.78274400 | -0.31141300 |
| H | 4.14513000 | -2.87040900 | 1.09198000  |
| H | 3.61124800 | -3.48146900 | -0.49423200 |
| C | 1.51486000 | -3.25488500 | 1.24701300  |
| H | 0.50131700 | -2.90919600 | 1.44604000  |
| H | 1.47276800 | -4.18327300 | 0.66754600  |
| H | 2.04095000 | -3.43998600 | 2.18538300  |

**INT9**

|   |             |             |             |
|---|-------------|-------------|-------------|
| C | -1.42588400 | 1.10197000  | 0.08509100  |
| C | -1.05482400 | 1.85792900  | -1.14774700 |
| C | -0.23052300 | 0.66579600  | -0.75170900 |
| H | -0.57231600 | 2.81814400  | -1.00265200 |
| H | -1.70275900 | 1.76605100  | -2.01289900 |
| H | -0.34797200 | -0.25466000 | -1.31569600 |
| C | 1.11675100  | 0.94707500  | -0.16466600 |
| C | 2.14711700  | -0.06844100 | -0.36033800 |
| H | 1.90443100  | -0.97011600 | -0.90955200 |
| C | 3.37267200  | 0.16031800  | 0.17773400  |
| H | 3.49970200  | 1.08655200  | 0.73591500  |
| C | 5.62945300  | -0.38680000 | 0.91685800  |
| H | 6.54615500  | -0.50052300 | 0.33000700  |
| H | 5.59152500  | 0.63142800  | 1.30651400  |
| H | 5.67089600  | -1.08235000 | 1.76502100  |
| C | 4.37258400  | -1.89863300 | -0.59349700 |
| H | 3.74264700  | -2.60616200 | -0.03768700 |
| H | 5.37105700  | -2.32444000 | -0.70448800 |
| H | 3.93977000  | -1.75854200 | -1.58839300 |
| N | 4.46801300  | -0.62342900 | 0.08389900  |
| O | 1.30290700  | 1.98931800  | 0.45644000  |
| H | -1.14229900 | 1.57767000  | 1.01985700  |
| C | -2.64320800 | 0.24925000  | 0.13899600  |
| C | -3.32151000 | 0.09035100  | 1.35027300  |
| C | -3.13911200 | -0.41135000 | -0.99044800 |
| C | -4.46218600 | -0.70251300 | 1.43375800  |
| H | -2.94769600 | 0.59696900  | 2.23584000  |
| C | -4.27718100 | -1.20546700 | -0.90926300 |
| H | -2.63197100 | -0.30576100 | -1.94651000 |

|   |             |             |             |
|---|-------------|-------------|-------------|
| C | -4.94549400 | -1.35478900 | 0.30381300  |
| H | -4.97285300 | -0.81032000 | 2.38569300  |
| H | -4.64488800 | -1.70893700 | -1.79811800 |
| H | -5.83470000 | -1.97371700 | 0.36520500  |

**INT10**

|   |             |             |             |
|---|-------------|-------------|-------------|
| C | -3.04524800 | 0.22670600  | -0.12692100 |
| C | -2.45500100 | 0.64070900  | -1.42761500 |
| C | -1.86496300 | -0.55295000 | -0.70941200 |
| H | -1.83255600 | 1.52948200  | -1.44168400 |
| H | -3.01756900 | 0.42359700  | -2.32944200 |
| H | -2.08865800 | -1.54257300 | -1.09469200 |
| C | -0.56728300 | -0.40048900 | -0.03222700 |
| C | 0.33318800  | -1.46903600 | -0.01418400 |
| H | 0.13360900  | -2.33839300 | -0.62758500 |
| C | 1.42450800  | -1.42479800 | 0.85138400  |
| H | 1.43737900  | -0.64843600 | 1.61432800  |
| C | 3.42796900  | -2.25508200 | 1.93553000  |
| H | 4.43439100  | -2.20760000 | 1.51086900  |
| H | 3.26041800  | -1.38840400 | 2.57529200  |
| H | 3.32835300  | -3.17222100 | 2.52471500  |
| C | 2.65702500  | -3.21434200 | -0.21860200 |
| H | 2.12758000  | -4.15166100 | -0.01771800 |
| H | 3.72858800  | -3.40616400 | -0.30716600 |
| H | 2.30110000  | -2.77982000 | -1.15468600 |
| N | 2.44852000  | -2.25210700 | 0.85660700  |
| O | -0.33484000 | 0.71960000  | 0.56703600  |
| H | -2.76925500 | 0.84324200  | 0.72337500  |
| C | -4.37508800 | -0.43386800 | -0.02763600 |
| C | -5.14112200 | -0.24823500 | 1.12530000  |
| C | -4.89087900 | -1.23723700 | -1.04958000 |
| C | -6.39137400 | -0.84496200 | 1.25612700  |
| H | -4.75091400 | 0.37431600  | 1.92568900  |
| C | -6.13861500 | -1.83733000 | -0.91948900 |
| H | -4.31625900 | -1.39752200 | -1.95889800 |
| C | -6.89504600 | -1.64293800 | 0.23376800  |
| H | -6.97129000 | -0.68471000 | 2.15960600  |
| H | -6.52255100 | -2.45746200 | -1.72342000 |
| H | -7.86970800 | -2.10927400 | 0.33329200  |
| C | -0.25253800 | 3.91423500  | -0.57787500 |
| C | -0.26839300 | 3.84918000  | 0.95374500  |
| B | 0.62967900  | 1.93425100  | 0.15496400  |

|   |             |             |             |
|---|-------------|-------------|-------------|
| O | 0.02248000  | 2.58116700  | -0.97361700 |
| O | 0.66020700  | 2.82645500  | 1.25717300  |
| C | 3.01162300  | 1.32160600  | 0.78952700  |
| C | 4.15413900  | 0.60448300  | 0.61725600  |
| C | 4.34408600  | -0.16996000 | -0.57452300 |
| C | 3.36347000  | -0.00744000 | -1.60907500 |
| C | 2.25149400  | 0.73860400  | -1.37811400 |
| N | 2.01093100  | 1.34419300  | -0.16201600 |
| H | 2.81035000  | 1.91980900  | 1.67083400  |
| H | 4.91633700  | 0.61506300  | 1.38896800  |
| H | 3.50637000  | -0.47603400 | -2.57623700 |
| H | 1.48185900  | 0.89500700  | -2.12594900 |
| C | 5.36503400  | -1.13321900 | -0.66833600 |
| N | 6.16295200  | -1.98708100 | -0.69990200 |
| H | 0.54194800  | 4.58406800  | -0.93407400 |
| H | -1.20621400 | 4.24628800  | -1.00198100 |
| H | 0.03619000  | 4.78620200  | 1.42929100  |
| H | -1.26940500 | 3.57729900  | 1.32060700  |

## INT11

|   |             |             |             |
|---|-------------|-------------|-------------|
| C | -1.89349900 | 0.70173400  | 0.23183600  |
| C | -1.27351500 | 1.46164100  | -0.90496800 |
| C | -0.82880400 | 0.04936900  | -0.65092100 |
| H | -0.57774000 | 2.25552700  | -0.65611600 |
| H | -1.88519000 | 1.65346900  | -1.78023800 |
| H | -1.20429600 | -0.70902900 | -1.33240000 |
| C | 0.49877600  | -0.24049900 | -0.09951900 |
| C | 1.22932200  | -1.39078300 | -0.33762800 |
| H | 0.78895600  | -2.09933100 | -1.03242700 |
| C | 2.45289100  | -1.66831300 | 0.25199000  |
| H | 2.85099700  | -0.99538800 | 1.00514900  |
| C | 4.10745600  | -3.24326900 | 1.01983100  |
| H | 4.92896500  | -3.82984300 | 0.59959500  |
| H | 4.53286100  | -2.40215100 | 1.57254100  |
| H | 3.55035000  | -3.87563200 | 1.72830100  |
| C | 2.76754200  | -3.74375000 | -0.96107100 |
| H | 1.90204700  | -4.28849200 | -0.54974900 |
| H | 3.56167400  | -4.46225800 | -1.17547700 |
| H | 2.46520200  | -3.27340100 | -1.90044800 |
| N | 3.27103900  | -2.73921500 | -0.05228700 |
| O | 0.99727500  | 0.69969400  | 0.78884800  |
| C | 3.03248800  | 3.00449200  | -1.02046400 |

|   |             |             |             |
|---|-------------|-------------|-------------|
| C | 3.37520000  | 3.31476500  | 0.45765100  |
| B | 1.86255500  | 1.65127400  | 0.34876800  |
| O | 2.19433200  | 1.85495000  | -0.96730900 |
| O | 2.47201800  | 2.52000000  | 1.21834700  |
| H | 3.91890400  | 2.78316700  | -1.61995900 |
| H | 2.48498500  | 3.82459700  | -1.49664300 |
| H | 3.23578900  | 4.36937600  | 0.70842800  |
| H | 4.40205500  | 3.02957400  | 0.70903200  |
| H | -1.53915500 | 0.97412600  | 1.22174400  |
| C | -3.29503000 | 0.21271200  | 0.17702600  |
| C | -4.00840100 | 0.02112500  | 1.36422300  |
| C | -3.93069300 | -0.09048200 | -1.03271300 |
| C | -5.31397200 | -0.45877500 | 1.34674900  |
| H | -3.52836600 | 0.25053400  | 2.31168000  |
| C | -5.23491800 | -0.57150600 | -1.05240700 |
| H | -3.40237300 | 0.04684200  | -1.97306600 |
| C | -5.93435100 | -0.75834600 | 0.13747000  |
| H | -5.84680400 | -0.59906500 | 2.28220400  |
| H | -5.70812400 | -0.79983300 | -2.00256100 |
| H | -6.95273600 | -1.13250000 | 0.12098000  |

## INT12

|   |             |             |             |
|---|-------------|-------------|-------------|
| C | 2.45965900  | -0.31678200 | 1.24887200  |
| C | 1.20960200  | -0.80676000 | 0.58552900  |
| C | 0.30728200  | 0.33665500  | 0.18812400  |
| H | 0.67270600  | -1.47124200 | 1.27184500  |
| H | 1.45752400  | -1.41083800 | -0.29983800 |
| H | 0.78266400  | 1.23927100  | -0.18509500 |
| C | -1.02958300 | 0.33627300  | 0.27839800  |
| C | -1.87984300 | 1.47009400  | -0.05383700 |
| H | -1.36735800 | 2.36126400  | -0.39859800 |
| C | -3.22155300 | 1.42514500  | 0.06424000  |
| H | -3.68651700 | 0.52356000  | 0.45476000  |
| C | -5.35940600 | 2.47704000  | 0.44664200  |
| H | -6.10838500 | 3.01473000  | -0.14117500 |
| H | -5.72728000 | 1.46432900  | 0.62701500  |
| H | -5.25002200 | 2.98261000  | 1.41812500  |
| C | -3.57238700 | 3.68378800  | -0.71413900 |
| H | -3.02539100 | 4.19477800  | 0.09435100  |
| H | -4.38762600 | 4.32833600  | -1.04941300 |
| H | -2.88546100 | 3.53174600  | -1.55118200 |
| N | -4.11392200 | 2.41197400  | -0.29334300 |



H 2.10731400 2.93921900 0.29362900

**INT13**

C 1.43233500 0.00885600 -0.03000700  
C 0.92300000 0.38355900 -1.43625400  
C -0.55260500 0.66776900 -1.57311500  
H 1.18000900 -0.43590800 -2.11876100  
H 1.47185200 1.26377700 -1.78941600  
H -0.81639200 1.51671200 -2.19700100  
C -1.60445100 -0.00046100 -1.07402800  
C -2.98854900 0.40230300 -1.29495800  
H -3.13036100 1.33983500 -1.82053100  
C -4.03571400 -0.34242300 -0.89121400  
H -3.84814900 -1.27142000 -0.35748900  
C -6.29780800 -0.53958100 -0.09543400  
H -7.30631100 -0.59922600 -0.51302500  
H -6.00581700 -1.53870100 0.23730600  
H -6.32294000 0.12516500 0.78255500  
C -5.70658400 1.18586800 -1.72331900  
H -5.41340600 2.04120800 -1.09339100  
H -6.78360900 1.22831600 -1.89762600  
H -5.19830500 1.27715500 -2.68698500  
N -5.37263800 -0.08253400 -1.11489300  
O -1.48559900 -1.08726300 -0.21801600  
C 0.83209000 -3.55478300 -1.36825600  
C 0.44240700 -4.05091800 0.04285100  
B -0.65347200 -2.14311700 -0.43743600  
O -0.05602900 -2.46422000 -1.62587200  
O -0.34987600 -2.99854900 0.59325800  
H 0.69758600 -4.31897400 -2.13684400  
H 1.86370000 -3.18708700 -1.40020100  
H 1.31719400 -4.21751600 0.67645000  
H -0.15650800 -4.96678800 0.00971100  
H 0.68177100 -0.58524200 0.49189200  
C 2.68805200 -0.83131700 -0.04782700  
C 2.86175200 -1.80231300 0.94551000  
C 3.68429300 -0.67476600 -1.01527200  
C 3.99438100 -2.61176800 0.96021000  
H 2.08308300 -1.92603300 1.69697600  
C 4.81848400 -1.48367300 -1.00194500  
H 3.56835000 0.07833300 -1.79000600  
C 4.97429900 -2.45731500 -0.01870800

H 4.11124600 -3.36523700 1.73347700  
H 5.58104700 -1.35346800 -1.76326900  
H 5.85604500 -3.08986200 -0.01314800  
C -1.63492200 -0.63155800 2.89011300  
C -2.72927100 0.37929700 2.45674800  
B -0.70298900 1.11944200 1.81587300  
O -0.40126200 -0.04309900 2.47867000  
O -2.03068500 1.45143400 1.82569200  
C -0.04253100 3.01476000 0.42537000  
C 0.85400100 3.75959500 -0.24425200  
C 2.26140300 3.37427500 -0.15449600  
C 2.63179800 2.21931700 0.42757600  
C 1.60638000 1.23545600 0.91970700  
N 0.30349700 1.88659300 1.14766500  
H -1.09784000 3.26671000 0.46137900  
H 0.56037700 4.64806600 -0.78458200  
H 3.67828800 1.95012300 0.52372100  
H 1.94080900 0.82490000 1.87995500  
C 3.26269700 4.27432800 -0.66818400  
N 4.05219500 5.00463000 -1.09583100  
H -1.74140400 -1.59803800 2.39120700  
H -1.61200200 -0.78185700 3.97313800  
H -3.29469500 0.77300300 3.30649500  
H -3.42469300 -0.05384900 1.73249700

**INT14**

C 1.48961900 -0.55240800 -0.72304200  
C 1.57700100 0.18803200 -2.08493200  
C 0.47398000 -0.19004000 -3.05941300  
H 2.52210200 -0.04948300 -2.57748100  
H 1.55661400 1.27095600 -1.93540400  
H 0.75261400 -0.66540900 -3.99968000  
C -0.79435000 -0.01457800 -2.85455800  
C -2.08548100 0.09213200 -2.57442600  
H -2.64367500 0.98759800 -2.82328400  
C -2.63736800 -0.95546800 -1.76529500  
H -1.99352600 -1.79298900 -1.51639600  
C -4.19130200 -1.98767600 -0.26508300  
H -5.18054500 -2.37435300 -0.51809100  
H -3.45115200 -2.78504800 -0.27765400  
H -4.18527700 -1.50994800 0.71815400  
C -4.71950000 0.18853700 -1.30650400



|   |             |             |             |   |             |             |             |
|---|-------------|-------------|-------------|---|-------------|-------------|-------------|
| H | -4.67902100 | 0.64686700  | -2.29327000 | C | -1.65950600 | 0.15505400  | 0.84308300  |
| H | -4.40636600 | 0.88785900  | -0.52573700 | C | -1.42759700 | 1.19987100  | 1.94807700  |
| H | -5.73533600 | -0.15836600 | -1.11898200 | C | -0.03623600 | 1.32144800  | 2.53270200  |
| N | -3.81779900 | -0.96002900 | -1.23558700 | H | -2.10828000 | 0.96209000  | 2.76990700  |
| H | 0.73212700  | -1.34065300 | -0.79295500 | H | -1.70493400 | 2.20413500  | 1.61128500  |
| C | 2.79857600  | -1.19631400 | -0.32111900 | H | 0.03382100  | 1.38177700  | 3.62042200  |
| C | 2.77920300  | -2.42993900 | 0.33609800  | C | 1.10249300  | 1.43224100  | 1.92206800  |
| C | 4.03075200  | -0.56308300 | -0.51160000 | C | 2.33446300  | 1.45054000  | 1.41655900  |
| C | 3.95685600  | -3.02559300 | 0.77586000  | H | 2.79773900  | 2.37214900  | 1.08055400  |
| H | 1.82223100  | -2.91926100 | 0.50387600  | C | 2.92464100  | 0.16771000  | 1.20403500  |
| C | 5.21163800  | -1.15531300 | -0.07094600 | H | 2.35842800  | -0.70550900 | 1.54569100  |
| H | 4.06732400  | 0.40937000  | -0.99648000 | C | 4.51222000  | -1.40357900 | 0.31215700  |
| C | 5.17916200  | -2.39034000 | 0.57018000  | H | 5.43361900  | -1.60495200 | 0.86446400  |
| H | 3.92074900  | -3.98690400 | 1.27888000  | H | 3.71897300  | -2.10998200 | 0.56181800  |
| H | 6.15827200  | -0.64730000 | -0.22599200 | H | 4.70867200  | -1.48455800 | -0.76032400 |
| H | 6.09975300  | -2.85298500 | 0.91090200  | C | 4.80998200  | 1.06379800  | 0.00594800  |
| C | -1.76405800 | 0.98948800  | 3.03273300  | H | 5.74593100  | 0.67882700  | -0.39525200 |
| C | -3.09109700 | 0.98575400  | 2.25305600  | H | 5.02755200  | 1.82092200  | 0.76131600  |
| B | -1.40844900 | -0.21105000 | 1.14484700  | H | 4.20666200  | 1.50607300  | -0.79558400 |
| O | -1.09702400 | -0.15046000 | 2.56315800  | N | 4.05627200  | -0.04093200 | 0.59654800  |
| O | -2.78597800 | 0.34493500  | 1.02827300  | O | 0.62050200  | -1.71798500 | 1.66223200  |
| C | -0.77632600 | 1.89154400  | -0.19411200 | H | -1.40397400 | -0.81759100 | 1.26514000  |
| C | 0.09217200  | 2.91342600  | -0.44921700 | C | -3.13000400 | 0.10063700  | 0.45365000  |
| C | 1.41979600  | 2.76667600  | 0.11265900  | C | -3.62766300 | -1.11594200 | -0.03240800 |
| C | 1.84095300  | 1.58852100  | 0.62757200  | C | -3.99186100 | 1.19700500  | 0.51035800  |
| C | 0.99373200  | 0.35503400  | 0.45617700  | C | -4.94990900 | -1.23027900 | -0.44239500 |
| N | -0.42612100 | 0.69788200  | 0.32935800  | H | -2.94757000 | -1.96385000 | -0.08652900 |
| H | -1.84531500 | 2.01046900  | -0.35577000 | C | -5.31937500 | 1.08318800  | 0.09728200  |
| H | -0.24104700 | 3.85745200  | -0.85465000 | H | -3.64369300 | 2.15693600  | 0.88028600  |
| H | 2.78239200  | 1.51469200  | 1.16010600  | C | -5.80324800 | -0.12936100 | -0.37833300 |
| H | 1.08262000  | -0.26928500 | 1.35391600  | H | -5.31850400 | -2.18230200 | -0.81217900 |
| C | 2.26475600  | 3.93118200  | 0.21448300  | H | -5.97310600 | 1.94843100  | 0.14853400  |
| N | 2.93897800  | 4.87079500  | 0.27194000  | H | -6.83679100 | -0.21781200 | -0.69787100 |
| H | -1.90596200 | 0.93517900  | 4.11704000  | C | -0.29083000 | -3.19908700 | -1.43311300 |
| H | -1.19255600 | 1.90286000  | 2.80044400  | C | 1.20674600  | -3.52763500 | -1.28033400 |
| H | -3.47666700 | 1.99975000  | 2.08172400  | B | 0.52017700  | -1.87308900 | 0.22458300  |
| H | -3.86123200 | 0.41323500  | 2.79326000  | O | -0.64878200 | -2.64154100 | -0.19327700 |
| O | -1.28363800 | -1.57115600 | 0.62699600  | O | 1.68277200  | -2.59630000 | -0.33195500 |
| C | -1.48000800 | -2.59781900 | 1.56731900  | C | 1.44628100  | -0.02909000 | -1.25831100 |
| H | -1.50161100 | -3.55904800 | 1.03717300  | C | 1.54605600  | 1.21177100  | -1.82922200 |
| H | -0.67532400 | -2.62544800 | 2.31006400  | C | 0.53833900  | 2.17084800  | -1.44378200 |
| H | -2.42446400 | -2.48217100 | 2.11932200  | C | -0.55396400 | 1.78437400  | -0.74945700 |
|   |             |             |             | C | -0.80218000 | 0.32316100  | -0.45303200 |
|   |             |             |             | N | 0.47281300  | -0.42082700 | -0.41542900 |

INT15

|   |             |             |             |
|---|-------------|-------------|-------------|
| H | 2.21947800  | -0.77679000 | -1.41853000 |
| H | 2.33989200  | 1.46731900  | -2.51702300 |
| H | -1.30338300 | 2.51288000  | -0.45721900 |
| H | -1.41467300 | -0.11584900 | -1.26234100 |
| C | 0.75393700  | 3.56721400  | -1.73031700 |
| N | 0.96228600  | 4.68356300  | -1.95668600 |
| H | -0.90226900 | -4.08140200 | -1.64944800 |
| H | -0.43638800 | -2.46893900 | -2.24691300 |
| H | 1.74671200  | -3.43727700 | -2.23285500 |
| H | 1.34942100  | -4.55095200 | -0.90419100 |
| H | 0.53354000  | -2.59768300 | 2.04559400  |

### INT16

|   |             |             |             |
|---|-------------|-------------|-------------|
| C | -1.08535900 | -1.14356400 | -0.04145800 |
| C | -0.41679300 | -1.42434300 | 1.30252500  |
| C | 1.06099900  | -1.19788100 | 1.18250100  |
| H | -0.63923700 | -2.44539100 | 1.62900400  |
| H | -0.83134800 | -0.74908700 | 2.06825700  |
| H | 1.74700400  | -1.75294700 | 1.81002100  |
| C | 1.56497400  | -0.25614600 | 0.36461400  |
| C | 3.00685000  | 0.01236000  | 0.24174000  |
| H | 3.34984400  | 1.03779700  | 0.33267500  |
| C | 3.88370800  | -0.99833100 | 0.08695700  |
| H | 3.50372700  | -2.00839100 | -0.05754900 |
| C | 6.00312600  | -1.87406200 | -0.67027000 |
| H | 7.01745900  | -1.96721800 | -0.27351600 |
| H | 5.51991400  | -2.85183300 | -0.60763700 |
| H | 6.06797400  | -1.58670200 | -1.73029700 |
| C | 5.84733800  | 0.39788600  | 0.23716700  |
| H | 5.65076800  | 1.02358400  | -0.64837500 |
| H | 6.92732400  | 0.29691800  | 0.36232000  |
| H | 5.44146200  | 0.90663700  | 1.11580700  |
| N | 5.25654900  | -0.91634300 | 0.12335700  |
| H | -0.62303600 | -1.81718400 | -0.77433000 |
| C | -2.58409500 | -1.36270900 | -0.09598400 |
| C | -3.20366500 | -1.48007800 | -1.34481500 |
| C | -3.38015000 | -1.43018300 | 1.04890200  |
| C | -4.57818600 | -1.65335200 | -1.45017400 |
| H | -2.59427200 | -1.44140100 | -2.24506300 |
| C | -4.75934400 | -1.60538700 | 0.94733600  |
| H | -2.92692900 | -1.35044400 | 2.03223300  |
| C | -5.36279900 | -1.71505800 | -0.30032000 |

|   |             |             |             |
|---|-------------|-------------|-------------|
| H | -5.03772800 | -1.74483200 | -2.42921700 |
| H | -5.36114700 | -1.65493300 | 1.84925300  |
| H | -6.43656500 | -1.85088000 | -0.37828200 |
| C | 1.06709400  | 1.77751100  | -0.90962500 |
| C | 0.18277600  | 2.80441200  | -0.91161300 |
| C | -1.03716300 | 2.64065200  | -0.12796100 |
| C | -1.46853700 | 1.40241100  | 0.19579000  |
| C | -0.74583800 | 0.28094400  | -0.50088100 |
| N | 0.69906700  | 0.54469200  | -0.41494300 |
| H | 2.09073500  | 1.88338100  | -1.25218800 |
| H | 0.44457100  | 3.76670300  | -1.32969100 |
| H | -2.29464400 | 1.22264800  | 0.87592200  |
| H | -0.99154700 | 0.35714000  | -1.57414700 |
| C | -1.69399100 | 3.81523700  | 0.38280200  |
| N | -2.21704500 | 4.76943900  | 0.77750000  |

### INT17

|   |             |             |             |
|---|-------------|-------------|-------------|
| C | -1.09076900 | -1.04825100 | -0.31000400 |
| C | -0.27535300 | -1.95176300 | 0.62557300  |
| C | 1.19884000  | -1.79361800 | 0.28721200  |
| H | -0.58884100 | -2.99311800 | 0.51628100  |
| H | -0.46436700 | -1.65858500 | 1.66415800  |
| H | 1.80070100  | -2.20519300 | 1.10892400  |
| C | 1.60142000  | -0.36003100 | 0.07584200  |
| C | 2.98783000  | -0.03191700 | -0.13223900 |
| H | 3.20503200  | 0.93276200  | -0.57981900 |
| C | 4.00907900  | -0.90045900 | 0.07955000  |
| H | 3.82763100  | -1.85908100 | 0.55893700  |
| C | 6.33690800  | -1.39918000 | 0.48811900  |
| H | 6.58062300  | -0.86382500 | 1.41809700  |
| H | 5.98775300  | -2.40092100 | 0.74918200  |
| H | 7.25019100  | -1.49890500 | -0.10390700 |
| C | 5.70422100  | 0.55963800  | -0.84235100 |
| H | 5.08649400  | 0.79154500  | -1.71446200 |
| H | 6.74719100  | 0.51538600  | -1.16137900 |
| H | 5.59271900  | 1.37593600  | -0.11064800 |
| N | 5.32110300  | -0.72228200 | -0.29572200 |
| H | -0.77446000 | -1.29495700 | -1.33750700 |
| C | -2.57656700 | -1.30567600 | -0.19973100 |
| C | -3.30562800 | -1.74164500 | -1.30484100 |
| C | -3.23961500 | -1.13841900 | 1.02077200  |
| C | -4.66890000 | -2.01014100 | -1.19829100 |

|   |             |             |             |
|---|-------------|-------------|-------------|
| H | -2.80176800 | -1.86981600 | -2.25927600 |
| C | -4.59938200 | -1.40474700 | 1.13045400  |
| H | -2.68683800 | -0.77859700 | 1.88496900  |
| C | -5.31842500 | -1.84344400 | 0.01982100  |
| H | -5.22204000 | -2.34536800 | -2.06986400 |
| H | -5.10024700 | -1.26501500 | 2.08305300  |
| H | -6.38062400 | -2.04837800 | 0.10480700  |
| C | 1.06617200  | 1.95834300  | 0.33396200  |
| C | 0.18379300  | 2.99491500  | 0.26660400  |
| C | -1.18236300 | 2.77861500  | 0.02841500  |
| C | -1.58273700 | 1.43452200  | -0.10595600 |
| C | -0.70709900 | 0.38640400  | -0.05378500 |
| N | 0.68155700  | 0.61967200  | 0.12667000  |
| H | 2.09315500  | 2.10027500  | 0.62595100  |
| H | 0.56083700  | 3.99639400  | 0.44298500  |
| H | -2.62734100 | 1.20126000  | -0.27850900 |
| C | -2.11485500 | 3.84905500  | -0.04479900 |
| N | -2.87483300 | 4.72505000  | -0.10600200 |
| H | 1.45999900  | -2.38209600 | -0.60255100 |

**INT18**

|   |             |             |             |
|---|-------------|-------------|-------------|
| C | -1.63495400 | -0.86501200 | -0.75727700 |
| C | -1.21027800 | -2.31340100 | -0.44979700 |
| C | 0.10811500  | -2.64804300 | -1.15460900 |
| H | -2.00487300 | -2.99136300 | -0.77204400 |
| H | -1.09614900 | -2.43554700 | 0.63363200  |
| H | 0.42923100  | -3.67171300 | -0.94937100 |
| C | 1.16685900  | -1.68932000 | -0.70616000 |
| C | 2.49319000  | -1.80795900 | -0.56699700 |
| H | 3.05435700  | -2.69313200 | -0.82999400 |
| C | 3.10424300  | -0.48111400 | -0.16178100 |
| H | 3.59057400  | -0.00696200 | -1.04559100 |
| C | 4.54691800  | 0.77183700  | 1.28353100  |
| H | 5.03581300  | 1.27639500  | 0.42816600  |
| H | 3.72767700  | 1.40588400  | 1.63330000  |
| H | 5.27475500  | 0.69248200  | 2.09455100  |
| C | 5.17353400  | -1.42735100 | 0.61878500  |
| H | 4.82637700  | -2.45291200 | 0.48057000  |
| H | 5.88328100  | -1.42438600 | 1.44969600  |
| H | 5.71160900  | -1.11099300 | -0.29413400 |
| N | 4.05654600  | -0.55513500 | 0.94332400  |
| H | -1.79805400 | -0.79773000 | -1.84230800 |

|   |             |             |             |
|---|-------------|-------------|-------------|
| C | -2.93984100 | -0.51442800 | -0.07205200 |
| C | -4.12482200 | -0.44606100 | -0.80344400 |
| C | -2.98698800 | -0.31168800 | 1.31072200  |
| C | -5.33737400 | -0.18144400 | -0.17007900 |
| H | -4.09762200 | -0.59812500 | -1.87940900 |
| C | -4.19505000 | -0.04843700 | 1.94546100  |
| H | -2.06533000 | -0.34246200 | 1.88622300  |
| C | -5.37493000 | 0.01659400  | 1.20592600  |
| H | -6.25013600 | -0.12609700 | -0.75442000 |
| H | -4.21628900 | 0.11135300  | 3.01863400  |
| H | -6.31728100 | 0.22629800  | 1.70122400  |
| C | 1.85361900  | 0.33654400  | 0.24357700  |
| C | 1.75554000  | 1.76742500  | -0.19633300 |
| C | 0.51560100  | 2.28433900  | -0.34543000 |
| C | -0.67819300 | 1.45457100  | -0.28577900 |
| C | -0.51883700 | 0.11010500  | -0.42176700 |
| N | 0.74354600  | -0.40563000 | -0.36346100 |
| H | 1.75748700  | 0.24997200  | 1.34304800  |
| H | 2.64892900  | 2.36113500  | -0.35490900 |
| H | -1.66355800 | 1.89912000  | -0.30260000 |
| C | 0.35847400  | 3.67915000  | -0.67445300 |
| N | 0.22121600  | 4.79936200  | -0.93080100 |
| H | -0.02892300 | -2.55924600 | -2.23997600 |

**INT19**

|   |             |             |             |
|---|-------------|-------------|-------------|
| C | -0.70015200 | -1.06256300 | -0.51260900 |
| C | -0.43194800 | -2.36941000 | 0.26210000  |
| C | 0.91348900  | -2.97790600 | -0.14362000 |
| H | -1.24813700 | -3.06893400 | 0.06447100  |
| H | -0.43658400 | -2.15701300 | 1.33719200  |
| H | 0.85240900  | -3.33939800 | -1.17866800 |
| C | 1.99485800  | -1.95297100 | -0.00747400 |
| C | 3.36019000  | -2.03377700 | 0.21490100  |
| H | 3.90906000  | -2.95863400 | 0.32465000  |
| C | 3.88872600  | -0.73226100 | 0.27792300  |
| H | 4.91709800  | -0.44905400 | 0.44372500  |
| H | -0.67837600 | -1.31431700 | -1.58336100 |
| C | -2.06801400 | -0.49905000 | -0.19339400 |
| C | -3.07072000 | -0.47990600 | -1.16135400 |
| C | -2.36096700 | -0.03054300 | 1.09149500  |
| C | -4.34528400 | -0.00693700 | -0.85568100 |
| H | -2.85220400 | -0.83805600 | -2.16411900 |



|   |             |             |             |               |             |             |             |
|---|-------------|-------------|-------------|---------------|-------------|-------------|-------------|
| C | 2.02769900  | -1.56313400 | -0.38219800 | H             | 2.46194500  | 3.14141500  | 0.23694900  |
| C | 1.42024700  | -2.41004500 | -1.45681300 | H             | -1.70369700 | 4.26208400  | -0.08143500 |
| C | 1.26007700  | -0.91272200 | -1.51243400 | H             | -2.24461800 | 2.13729400  | 1.05328400  |
| H | 0.53008900  | -2.97901100 | -1.21337100 | C             | 0.74663500  | 5.19211600  | -0.34626400 |
| H | 2.08969000  | -2.85456300 | -2.18527600 | N             | 1.05686400  | 6.26443400  | -0.65107500 |
| H | 1.84566000  | -0.36956200 | -2.24743400 | H             | -0.56002700 | -2.43737700 | 2.10182400  |
| C | -0.03814300 | -0.30730600 | -1.17220800 | H             | -0.05342600 | -2.15885700 | 3.80069800  |
| C | -0.48704700 | 0.87370200  | -1.61698300 | H             | -2.03129900 | -0.81551900 | 4.23685100  |
| H | 0.07851900  | 1.47110400  | -2.31989100 | H             | -2.71062500 | -1.77410000 | 2.87797300  |
| C | -1.71377500 | 1.42715900  | -0.95916900 | N             | -2.79663100 | 0.34954700  | -0.95844100 |
| O | -0.76984400 | -1.00334900 | -0.25897600 | C             | -3.90685500 | 0.66873300  | -0.02756500 |
| C | -2.92210900 | -3.25197700 | -1.33506100 | C             | -3.36173300 | 0.34086200  | -2.33721700 |
| C | -3.65920400 | -2.87219000 | -0.04880400 | H             | -4.72478900 | -0.02570500 | -0.22560600 |
| B | -2.16347900 | -1.22166600 | -0.60352000 | H             | -3.58115600 | 0.53252200  | 1.00062000  |
| O | -2.37349100 | -2.02816000 | -1.77424400 | H             | -4.25213800 | 1.69334700  | -0.20884100 |
| O | -2.88508200 | -1.81451300 | 0.48255200  | H             | -3.82999400 | 1.31015200  | -2.53677000 |
| H | -3.57902400 | -3.67325600 | -2.10280700 | H             | -4.09535100 | -0.45853400 | -2.41564300 |
| H | -2.12405000 | -3.97845100 | -1.12193600 | H             | -2.55908000 | 0.14736000  | -3.04719900 |
| H | -3.72585400 | -3.69144200 | 0.67429800  | H             | -2.13677100 | 2.24702500  | -1.55511500 |
| H | -4.68163900 | -2.52667100 | -0.27273800 |               |             |             |             |
| H | 1.50180000  | -1.56313600 | 0.57168200  |               |             |             |             |
| C | 3.50836500  | -1.36929000 | -0.30025800 | <b>INT-AB</b> |             |             |             |
| C | 4.07038300  | -0.09409800 | -0.39905500 |               |             |             |             |
| C | 4.35278900  | -2.46241000 | -0.09374000 | C             | 1.70979400  | -0.55776300 | -0.77069700 |
| C | 5.44635200  | 0.08648900  | -0.28726600 | C             | 2.08128800  | 0.13160100  | -2.09052100 |
| H | 3.41475400  | 0.75668800  | -0.57332600 | C             | 1.08488300  | 1.05782800  | -2.74882600 |
| C | 5.72814900  | -2.28577100 | 0.01815000  | H             | 2.30652600  | -0.64672900 | -2.82766300 |
| H | 3.91979800  | -3.45675800 | -0.02382700 | H             | 3.00358500  | 0.71798000  | -1.97828000 |
| C | 6.27853500  | -1.00958600 | -0.07726600 | H             | 1.25855200  | 1.25365300  | -3.80898600 |
| H | 5.86934000  | 1.08295200  | -0.36929300 | C             | 0.07552200  | 1.69229000  | -2.23927200 |
| H | 6.37277500  | -3.14478000 | 0.17727200  | C             | -0.95830300 | 2.35893200  | -1.74761300 |
| H | 7.35166200  | -0.87085900 | 0.00745300  | H             | -0.79147700 | 3.31749600  | -1.26808000 |
| C | -0.51397700 | -1.70892100 | 2.91901400  | C             | -2.17445300 | 1.61914100  | -1.59697000 |
| C | -1.90379400 | -1.11143400 | 3.18986200  | H             | -2.27740400 | 0.69643200  | -2.16219800 |
| B | -0.64033400 | 0.30393000  | 1.99034100  | C             | -4.23202500 | 0.94007100  | -0.58171500 |
| O | 0.27237000  | -0.59276800 | 2.48321500  | H             | -5.18788200 | 1.46685100  | -0.55219400 |
| O | -1.93384400 | 0.06642400  | 2.37661800  | H             | -4.22631900 | 0.20890700  | -1.38983700 |
| C | 1.02967100  | 1.75332000  | 0.96656900  | H             | -4.03398600 | 0.44294600  | 0.37528300  |
| C | 1.41796900  | 2.89567400  | 0.36914800  | C             | -3.16876200 | 3.02243100  | 0.14707600  |
| C | 0.37313700  | 3.84958500  | 0.02294300  | H             | -3.05966900 | 2.59223700  | 1.14714000  |
| C | -0.93075800 | 3.52455500  | 0.10772000  | H             | -4.12194100 | 3.54679600  | 0.05200300  |
| C | -1.35304300 | 2.10824700  | 0.42164500  | H             | -2.35154900 | 3.71077100  | -0.05122900 |
| N | -0.29748500 | 1.43839600  | 1.18388400  | N             | -3.15535400 | 1.90689300  | -0.79649800 |
| H | 1.73904600  | 1.02823100  | 1.35709700  | O             | -1.34381200 | -0.53804900 | -0.33452700 |

|   |             |             |             |
|---|-------------|-------------|-------------|
| C | -3.94119700 | -2.62387000 | -1.52356300 |
| C | -3.82952000 | -3.07802100 | -0.05442200 |
| B | -2.30885500 | -1.45010300 | -0.45568600 |
| O | -2.82436300 | -1.76749300 | -1.71662900 |
| O | -2.98970700 | -2.10810700 | 0.55411400  |
| H | -4.86875000 | -2.06202800 | -1.70226200 |
| H | -3.90332600 | -3.45531000 | -2.23164500 |
| H | -3.36232400 | -4.06575800 | 0.02841400  |
| H | -4.79658300 | -3.10719300 | 0.45480600  |
| H | 0.71169200  | -0.98612600 | -0.88629700 |
| C | 2.66102800  | -1.70898100 | -0.47523300 |
| C | 2.22699100  | -2.69423400 | 0.42271400  |
| C | 3.94649300  | -1.81564000 | -1.00869700 |
| C | 3.05078000  | -3.75961200 | 0.76189200  |
| H | 1.23695600  | -2.59579300 | 0.86547300  |
| C | 4.77539200  | -2.88477200 | -0.66568600 |
| H | 4.32088400  | -1.06755400 | -1.70152500 |
| C | 4.33019100  | -3.86128700 | 0.21617700  |
| H | 2.69406300  | -4.51398400 | 1.45657700  |
| H | 5.77162600  | -2.94922600 | -1.09243300 |
| H | 4.97392800  | -4.69413300 | 0.48084700  |
| C | -0.81997200 | -0.88053000 | 3.11435800  |
| C | -2.13183300 | -0.10683600 | 2.93784500  |
| B | -0.86132000 | -0.05636100 | 0.98749700  |
| O | -0.42473800 | -1.17777500 | 1.79729100  |
| O | -1.96229700 | 0.59533600  | 1.71716600  |
| C | 0.18221400  | 2.25313900  | 1.07859300  |
| C | 1.15499600  | 3.19998900  | 1.00609100  |
| C | 2.47639800  | 2.73455600  | 0.62869100  |
| C | 2.72435800  | 1.42655100  | 0.41953600  |
| C | 1.64987700  | 0.37409100  | 0.50021700  |
| N | 0.31453100  | 0.94917600  | 0.74739700  |
| H | -0.81497800 | 2.51486300  | 1.41782200  |
| H | 0.98247800  | 4.22619000  | 1.29542700  |
| H | 3.73121600  | 1.08317000  | 0.19686900  |
| H | 1.86824600  | -0.30447600 | 1.33941400  |
| C | 3.55149300  | 3.68743600  | 0.50388500  |
| N | 4.39893400  | 4.46886900  | 0.39495900  |
| H | -0.94356100 | -1.80255900 | 3.69178600  |
| H | -0.06859100 | -0.24980900 | 3.61703800  |
| H | -2.32484500 | 0.59314700  | 3.75956000  |
| H | -2.97692500 | -0.80336500 | 2.85164000  |

**INT-AC**

|   |             |             |             |
|---|-------------|-------------|-------------|
| C | -0.63984500 | -1.29383400 | -0.31814900 |
| C | -0.16868800 | -2.20087600 | 0.83526600  |
| C | 1.21301100  | -2.73989100 | 0.57384000  |
| H | -0.89770300 | -3.00076500 | 0.98708600  |
| H | -0.13443600 | -1.60639600 | 1.76182600  |
| H | 1.48643800  | -3.75961700 | 0.81307100  |
| C | 2.11230900  | -1.84904300 | 0.12220700  |
| C | 3.57026100  | -1.82189300 | -0.01359100 |
| H | 4.20888900  | -2.67357900 | 0.17657800  |
| C | 3.95949700  | -0.55812700 | -0.29234300 |
| H | 4.97163100  | -0.19135400 | -0.39125400 |
| H | -0.62293800 | -1.92203200 | -1.21631200 |
| C | -2.04707100 | -0.75185700 | -0.17852000 |
| C | -2.74675600 | -0.39041400 | -1.33408800 |
| C | -2.65660400 | -0.54603800 | 1.06106500  |
| C | -4.01945800 | 0.16436800  | -1.25716800 |
| H | -2.28462200 | -0.54929800 | -2.30583700 |
| C | -3.93326400 | 0.00623900  | 1.14145800  |
| H | -2.13691500 | -0.81556500 | 1.97505000  |
| C | -4.61765400 | 0.36465600  | -0.01546200 |
| H | -4.54574700 | 0.43722000  | -2.16622200 |
| H | -4.39191400 | 0.15670100  | 2.11358700  |
| H | -5.61119200 | 0.79586600  | 0.04996800  |
| C | 2.77024300  | 0.29192200  | -0.35057500 |
| C | 2.55292100  | 1.63531300  | -0.39546000 |
| C | 1.21046600  | 2.07025000  | -0.03022300 |
| C | 0.15343100  | 1.22023500  | -0.00125300 |
| C | 0.37563100  | -0.14899500 | -0.59810100 |
| N | 1.69924200  | -0.54777000 | -0.15444400 |
| H | 3.35483500  | 2.34914300  | -0.51930700 |
| H | -0.82351600 | 1.53304800  | 0.34912500  |
| H | 0.40378500  | -0.01741300 | -1.69744500 |
| C | 1.03686600  | 3.43660000  | 0.39483600  |
| N | 0.91098900  | 4.53810700  | 0.72696400  |

**INT-AD**

|   |             |             |             |
|---|-------------|-------------|-------------|
| C | -0.71883200 | -0.99632400 | 1.04265100  |
| C | -1.60880100 | -0.52052500 | 0.17055300  |
| C | 1.68158000  | 1.21367900  | 0.26885800  |
| C | 1.62130500  | 0.10230900  | 1.38904100  |
| C | 0.18567700  | -0.16385100 | 1.90560200  |
| H | 1.35842200  | 0.21677500  | -2.90623300 |

|   |             |             |             |
|---|-------------|-------------|-------------|
| H | -0.61399800 | -2.07685400 | 1.09883400  |
| C | 1.84460600  | 0.60001900  | -2.00824800 |
| C | 3.08976600  | 1.71095000  | 0.17991600  |
| H | -0.27173600 | 0.81003600  | 2.10224200  |
| C | 3.83356300  | 1.50590100  | -0.94658300 |
| C | 3.23683000  | 0.89510500  | -2.07691400 |
| H | 3.52743900  | 2.19405700  | 1.04836700  |
| H | 3.80516300  | 0.70636100  | -2.97797900 |
| N | 1.08621300  | 0.76170300  | -0.97059500 |
| C | 5.21166500  | 1.92735500  | -0.99577800 |
| N | 6.31704700  | 2.26566800  | -1.03727600 |
| C | 2.42062400  | -1.12674700 | 1.01079600  |
| C | 3.61595500  | -1.40067600 | 1.68210200  |
| C | 2.02045100  | -1.99430500 | -0.01429900 |
| C | 4.39148100  | -2.50836500 | 1.35203400  |
| H | 3.94409100  | -0.73298400 | 2.47554900  |
| C | 2.79439000  | -3.10321900 | -0.34450600 |
| H | 1.10121000  | -1.79716900 | -0.55468300 |
| C | 3.98076200  | -3.36464200 | 0.33532200  |
| H | 5.31613500  | -2.69919300 | 1.88737700  |
| H | 2.46642800  | -3.76529400 | -1.13982500 |
| H | 4.58176500  | -4.22944900 | 0.07301200  |
| H | 2.14212600  | 0.56797900  | 2.23698500  |
| H | 0.29379500  | -0.66378100 | 2.87505300  |
| O | -2.25487800 | -1.42799300 | -0.66386900 |
| C | -5.65197700 | -2.31238100 | -1.13179800 |
| C | -5.75658800 | -1.22941800 | -0.03752900 |
| H | -6.32391000 | -2.13040100 | -1.97405300 |
| H | -5.85182400 | -3.31332000 | -0.73297500 |
| H | -6.18193600 | -0.29709100 | -0.42625400 |
| H | -6.34557000 | -1.55106500 | 0.82472500  |
| B | -3.60637400 | -1.53578400 | -0.62078600 |
| O | -4.40915600 | -0.99539100 | 0.35884100  |
| O | -4.30014600 | -2.24529700 | -1.57039700 |
| C | -1.92191500 | 0.88922200  | -0.10927200 |
| H | -1.67289600 | 1.24007800  | -1.10595400 |
| C | -2.47845300 | 1.68681000  | 0.81698400  |
| H | -2.76728400 | 1.26262200  | 1.77786500  |
| N | -2.70870500 | 3.04559900  | 0.70984900  |
| C | -2.42770700 | 3.65831700  | -0.56923300 |
| H | -3.09854700 | 3.29660700  | -1.36536100 |
| H | -2.53867400 | 4.74140400  | -0.48097500 |
| H | -1.39813100 | 3.43297200  | -0.86173200 |
| C | -3.87756000 | 3.56143300  | 1.39674100  |

**TS10**

|   |             |             |             |
|---|-------------|-------------|-------------|
| H | -3.77703600 | 4.64187700  | 1.53150400  |
| H | -4.81258900 | 3.36356400  | 0.85016800  |
| H | -3.95370400 | 3.09749600  | 2.38304600  |
| H | 1.03376500  | 2.01845900  | 0.65615200  |
| C | -2.99046200 | 0.12655400  | -0.17318300 |
| C | -2.31791300 | 0.34631100  | -1.48628600 |
| C | -1.79580800 | -0.72958900 | -0.56192400 |
| H | -1.68423900 | 1.22123200  | -1.59059000 |
| H | -2.83737700 | 0.01629200  | -2.37973400 |
| H | -1.99917300 | -1.76415200 | -0.81987000 |
| C | -0.51441200 | -0.45710900 | 0.13602900  |
| C | 0.44074200  | -1.50654700 | 0.21564700  |
| H | 0.26469600  | -2.42325700 | -0.33263500 |
| C | 1.54968900  | -1.33587100 | 1.01646600  |
| H | 1.57513500  | -0.45896900 | 1.66136700  |
| C | 3.63921000  | -1.96215100 | 2.09221300  |
| H | 4.62088100  | -1.92338400 | 1.60953400  |
| H | 3.46351100  | -1.02863000 | 2.62819700  |
| H | 3.62395700  | -2.79526800 | 2.80311000  |
| C | 2.77533700  | -3.23411200 | 0.14603100  |
| H | 2.21603900  | -4.12176500 | 0.46283800  |
| H | 3.83769800  | -3.47476900 | 0.07354900  |
| H | 2.42362300  | -2.91765300 | -0.83938600 |
| N | 2.60741600  | -2.13574800 | 1.08382900  |
| O | -0.32738300 | 0.69106000  | 0.62343500  |
| H | -2.75503400 | 0.85698500  | 0.59605000  |
| C | -4.34068600 | -0.49132400 | -0.07371100 |
| C | -5.18506200 | -0.11859400 | 0.97486800  |
| C | -4.79967500 | -1.44060600 | -0.99290400 |
| C | -6.45382700 | -0.67505600 | 1.10444100  |
| H | -4.83898600 | 0.61656500  | 1.69623600  |
| C | -6.06606100 | -2.00029600 | -0.86387200 |
| H | -4.16457500 | -1.74862100 | -1.82010900 |
| C | -6.89951400 | -1.61972500 | 0.18546500  |
| H | -7.09326200 | -0.37051300 | 1.92695500  |
| H | -6.40465500 | -2.73596600 | -1.58678500 |
| H | -7.88760600 | -2.05692200 | 0.28480400  |
| C | -0.86921300 | 3.64801900  | -0.43341500 |
| C | -0.52575500 | 3.63962600  | 1.07476800  |
| B | 0.76730700  | 2.16600500  | 0.02375400  |

|   |             |             |             |
|---|-------------|-------------|-------------|
| O | -0.04162800 | 2.64111400  | -1.00802400 |
| O | 0.72209000  | 2.96495000  | 1.15468900  |
| C | 3.10216200  | 1.49628400  | 0.57453800  |
| C | 4.20044700  | 0.72329700  | 0.37863700  |
| C | 4.28104400  | -0.14048700 | -0.76100700 |
| C | 3.22950900  | -0.03884900 | -1.72658000 |
| C | 2.16262600  | 0.76659500  | -1.49040300 |
| N | 2.04207000  | 1.49576300  | -0.31865900 |
| H | 2.98152200  | 2.15727500  | 1.42450600  |
| H | 5.01206900  | 0.75528700  | 1.09701500  |
| H | 3.27584600  | -0.60905500 | -2.64708900 |
| H | 1.33640100  | 0.87167700  | -2.18398500 |
| C | 5.28809900  | -1.12165800 | -0.85733900 |
| N | 6.08933600  | -1.97040600 | -0.88461900 |
| H | -0.63488000 | 4.60840300  | -0.90510200 |
| H | -1.92423600 | 3.41583500  | -0.61592100 |
| H | -0.42733800 | 4.64400800  | 1.49423500  |
| H | -1.27580600 | 3.08280800  | 1.64850900  |

**TS11**

|   |             |             |             |
|---|-------------|-------------|-------------|
| C | -3.09211700 | 0.46339600  | 0.14953900  |
| C | -2.60842200 | 1.33734100  | -0.96939900 |
| C | -1.88811600 | 0.05000600  | -0.70871900 |
| H | -2.10278800 | 2.25856500  | -0.71184300 |
| H | -3.22398400 | 1.38606800  | -1.86231200 |
| H | -2.09580900 | -0.76864500 | -1.39332400 |
| C | -0.56321900 | -0.03990600 | -0.07100200 |
| C | 0.17781300  | -1.21880400 | -0.07781400 |
| H | -0.13208800 | -1.97441900 | -0.79494600 |
| C | 1.23568100  | -1.48246500 | 0.77795900  |
| H | 1.42806800  | -0.80857600 | 1.60727100  |
| C | 2.86086000  | -2.95713100 | 1.81354900  |
| H | 3.81075000  | -3.40962600 | 1.51181100  |
| H | 3.07265400  | -2.09745400 | 2.45651500  |
| H | 2.28832700  | -3.68998600 | 2.40063300  |
| C | 1.99517700  | -3.45539900 | -0.43425300 |
| H | 2.90755000  | -4.05161800 | -0.51543600 |
| H | 1.84453500  | -2.91796700 | -1.37729200 |
| H | 1.13904900  | -4.13116600 | -0.28488200 |
| N | 2.15034200  | -2.50184800 | 0.63779800  |
| O | -0.20890800 | 0.96068700  | 0.80674900  |
| C | 0.77783600  | 4.05550900  | -0.68741900 |

|   |             |             |             |
|---|-------------|-------------|-------------|
| C | 0.92302100  | 4.30855900  | 0.82713000  |
| B | 0.36934400  | 2.15970000  | 0.42410200  |
| O | 0.07793800  | 2.82300500  | -0.77035300 |
| O | 0.81342000  | 3.02268600  | 1.42159900  |
| C | 3.14955500  | 1.14483400  | 0.75706300  |
| C | 4.11481400  | 0.15816200  | 0.61934300  |
| C | 4.11887400  | -0.58603000 | -0.56336300 |
| C | 3.22557600  | -0.26576900 | -1.58676800 |
| C | 2.31049600  | 0.75490200  | -1.35282700 |
| N | 2.26327100  | 1.42172000  | -0.20194800 |
| H | 3.03975300  | 1.72333400  | 1.67139200  |
| H | 4.80865500  | -0.06620200 | 1.42098500  |
| H | 3.21902800  | -0.82304800 | -2.51592700 |
| H | 1.55175000  | 1.02695200  | -2.08272300 |
| C | 4.98142600  | -1.73285000 | -0.68593800 |
| N | 5.64426600  | -2.67884400 | -0.76166900 |
| H | 1.76101800  | 3.95023900  | -1.16447200 |
| H | 0.21476600  | 4.83750600  | -1.20252800 |
| H | 0.12060300  | 4.95116600  | 1.20860800  |
| H | 1.88464700  | 4.76429800  | 1.08261200  |
| H | -2.81733000 | 0.79558700  | 1.14672100  |
| C | -4.36494500 | -0.29509600 | 0.07002200  |
| C | -5.06368400 | -0.59727800 | 1.24315800  |
| C | -4.89817900 | -0.73343000 | -1.14804600 |
| C | -6.25817500 | -1.30920900 | 1.20403600  |
| H | -4.66267900 | -0.26363300 | 2.19639600  |
| C | -6.09085600 | -1.44700600 | -1.18935400 |
| H | -4.37785000 | -0.51443700 | -2.07739200 |
| C | -6.77850500 | -1.73806300 | -0.01350300 |
| H | -6.78355200 | -1.52890200 | 2.12841100  |
| H | -6.48606100 | -1.77672700 | -2.14540500 |
| H | -7.70996700 | -2.29365300 | -0.04697600 |

**TS12**

|   |             |             |             |
|---|-------------|-------------|-------------|
| C | -1.86711900 | 0.90447000  | 0.61132200  |
| C | -1.05713100 | 1.70590100  | -0.33804400 |
| C | -0.51131700 | 0.36477500  | -0.67937500 |
| H | -0.35104100 | 2.38893300  | 0.13176900  |
| H | -1.60008800 | 2.20549600  | -1.13881100 |
| H | -1.06662000 | -0.22502000 | -1.40068900 |
| C | 0.66152900  | -0.17508900 | -0.18532300 |
| C | 1.11871500  | -1.49957800 | -0.45586800 |



|             |             |             |             |   |             |             |             |
|-------------|-------------|-------------|-------------|---|-------------|-------------|-------------|
| H           | 0.50194400  | -2.08642700 | -1.12821000 | C | 1.33027800  | -0.32105200 | -1.84694900 |
| C           | 2.25565400  | -2.01355100 | 0.08432200  | C | 2.65561400  | -0.67770100 | -1.64067100 |
| H           | 2.81946600  | -1.41612000 | 0.79556300  | H | 2.86633900  | -1.21255500 | -0.72280700 |
| C           | 3.61293000  | -3.86431100 | 0.83567000  | C | 3.64748900  | -0.17829000 | -2.44976600 |
| H           | 4.30905100  | -4.57756400 | 0.38592300  | H | 3.37987100  | 0.36434100  | -3.35400500 |
| H           | 4.19266400  | -3.10032600 | 1.35839500  | C | 5.95518200  | 0.12417900  | -3.17438200 |
| H           | 2.99701100  | -4.39692700 | 1.57600400  | H | 6.51605800  | -0.73898500 | -3.54743900 |
| C           | 2.08320400  | -4.13928100 | -1.05838200 | H | 5.46737400  | 0.61469700  | -4.01728600 |
| H           | 1.14272000  | -4.48291500 | -0.59909100 | H | 6.65635300  | 0.82617800  | -2.71372600 |
| H           | 2.70451500  | -5.00968200 | -1.27945400 | C | 5.40752800  | -0.91418700 | -0.97437400 |
| H           | 1.84433200  | -3.63849100 | -2.00049400 | H | 4.85449800  | -0.49237600 | -0.12896000 |
| N           | 2.81708100  | -3.23686500 | -0.20110100 | H | 6.47211800  | -0.71487100 | -0.84914700 |
| O           | 1.41256100  | 0.55739600  | 0.72109800  | H | 5.24649700  | -1.99774100 | -0.99678000 |
| C           | 2.82134800  | 3.38612900  | -0.92446200 | N | 4.95364400  | -0.29030800 | -2.20926500 |
| C           | 3.47767800  | 3.42628700  | 0.47286100  | O | 1.26773300  | 1.39776900  | -0.97018400 |
| B           | 2.08936000  | 1.66609300  | 0.32348900  | C | -0.97796100 | 4.16342300  | -1.25526200 |
| O           | 2.14854900  | 2.13101300  | -0.96737100 | C | -0.22066900 | 4.46290600  | 0.05682100  |
| O           | 2.78132500  | 2.43670600  | 1.22411600  | B | 0.51516900  | 2.53136400  | -0.84464800 |
| H           | 3.54865600  | 3.44301800  | -1.73761900 | O | -0.28270800 | 3.05136500  | -1.82739700 |
| H           | 2.08627500  | 4.18825300  | -1.05354600 | O | 0.55869700  | 3.29212100  | 0.29953300  |
| H           | 3.37549000  | 4.39854200  | 0.96066500  | H | -0.95558400 | 4.99981000  | -1.95750300 |
| H           | 4.54038900  | 3.16367800  | 0.43257900  | H | -2.01584300 | 3.87403400  | -1.06565500 |
| H           | -1.43594700 | 0.73815700  | 1.59284200  | H | -0.90072200 | 4.62694400  | 0.89541800  |
| C           | -3.18262700 | 0.38940300  | 0.35094700  | H | 0.45204200  | 5.32224300  | -0.03692000 |
| C           | -3.85916100 | -0.34025200 | 1.35351200  | H | -0.59225200 | 0.25592300  | 0.17754000  |
| C           | -3.84494700 | 0.56438100  | -0.88409600 | C | -2.44814100 | 1.25630900  | -0.05975200 |
| C           | -5.12771000 | -0.85228400 | 1.13824400  | C | -2.26319800 | 1.96871000  | 1.13154600  |
| H           | -3.36785400 | -0.49130000 | 2.31095500  | C | -3.52739500 | 1.59503300  | -0.88346500 |
| C           | -5.11371300 | 0.04276800  | -1.09451400 | C | -3.13229000 | 2.99893400  | 1.48434000  |
| H           | -3.35779800 | 1.11054500  | -1.68687500 | H | -1.42553200 | 1.71027200  | 1.77725500  |
| C           | -5.76820500 | -0.66702500 | -0.08879000 | C | -4.39748000 | 2.62414100  | -0.53026800 |
| H           | -5.62466900 | -1.40280000 | 1.93146700  | H | -3.68949500 | 1.04848900  | -1.80860100 |
| H           | -5.59846800 | 0.19246700  | -2.05478100 | C | -4.20053900 | 3.33253200  | 0.65349000  |
| H           | -6.76064400 | -1.07131200 | -0.25721000 | H | -2.97550100 | 3.54003200  | 2.41306900  |
|             |             |             |             | H | -5.23066000 | 2.87201400  | -1.18046100 |
|             |             |             |             | H | -4.87830000 | 4.13413900  | 0.92920600  |
|             |             |             |             | C | 1.68719000  | -3.11949800 | 2.51332200  |
|             |             |             |             | C | 2.32340000  | -2.05986800 | 1.59002000  |
|             |             |             |             | B | 0.00149900  | -2.07253800 | 1.44136200  |
|             |             |             |             | O | 0.42849600  | -3.36228100 | 1.94716800  |
|             |             |             |             | O | 1.23973100  | -1.40418400 | 0.97337700  |
|             |             |             |             | C | -0.93529100 | -3.21863300 | -0.57657600 |
|             |             |             |             | C | -1.84091000 | -3.48154200 | -1.56282000 |
|             |             |             |             | C | -3.10062100 | -2.77109600 | -1.47384400 |
| <b>TS13</b> |             |             |             |   |             |             |             |
| C           | -1.52316800 | 0.10813100  | -0.38393700 |   |             |             |             |
| C           | -1.18771900 | 0.03391500  | -1.88936600 |   |             |             |             |
| C           | 0.11092500  | -0.66877800 | -2.15387600 |   |             |             |             |
| H           | -1.13137800 | 1.04414000  | -2.30109700 |   |             |             |             |
| H           | -1.98183100 | -0.49602500 | -2.42091600 |   |             |             |             |
| H           | 0.07843600  | -1.65424600 | -2.62163900 |   |             |             |             |

|   |             |             |             |   |             |             |             |
|---|-------------|-------------|-------------|---|-------------|-------------|-------------|
| C | -3.27847400 | -1.75477100 | -0.60020300 | C | -3.24217600 | -1.58739000 | -1.91798700 |
| C | -2.11426300 | -1.22670300 | 0.19358000  | H | -2.90715900 | -2.43775900 | -2.50856300 |
| N | -1.07108800 | -2.24318500 | 0.34628300  | C | -5.35877000 | -2.77630100 | -1.74496800 |
| H | -0.04473900 | -3.82849700 | -0.44746800 | H | -6.24332200 | -2.40429700 | -2.27210800 |
| H | -1.71186500 | -4.30591700 | -2.24858300 | H | -4.84013800 | -3.48677900 | -2.38948400 |
| H | -4.24983200 | -1.28913100 | -0.47390500 | H | -5.68383000 | -3.29200100 | -0.83643600 |
| H | -2.46114600 | -0.95230800 | 1.19468500  | C | -4.95917600 | -0.65239200 | -0.50094000 |
| C | -4.21321400 | -3.21264500 | -2.27934600 | H | -4.18017300 | -0.39607700 | 0.22457700  |
| N | -5.09395000 | -3.56232700 | -2.94469000 | H | -5.83989800 | -1.03631400 | 0.01528700  |
| H | 1.58639500  | -2.71950300 | 3.53727700  | H | -5.23422600 | 0.25409400  | -1.05157000 |
| H | 2.27180300  | -4.04414100 | 2.56716900  | N | -4.46628400 | -1.68376300 | -1.40767300 |
| H | 2.95573300  | -2.54982000 | 0.82897000  | O | -0.49654700 | -2.11935200 | -0.94745500 |
| H | 2.95874400  | -1.34821000 | 2.13791900  | C | 2.77146700  | -3.56289700 | -0.92227700 |
| O | -0.55659500 | -1.19847800 | 2.50833400  | C | 2.16774600  | -4.05071200 | 0.40876600  |
| H | 1.86173800  | 1.21072100  | -0.11216900 | B | 0.67614500  | -2.78420100 | -0.71031400 |
| O | 2.66384900  | 1.04189100  | 1.03520400  | O | 1.65927900  | -3.00754400 | -1.63430900 |
| H | 2.00807700  | 0.75856700  | 1.75672000  | O | 0.94358600  | -3.32237300 | 0.52789500  |
| O | 1.01868200  | 0.74420400  | 2.96405900  | H | 3.21277500  | -4.36823200 | -1.51264100 |
| H | 0.35897500  | 0.00166700  | 2.77702500  | H | 3.51692800  | -2.77659800 | -0.75927600 |
| C | 3.23152900  | 2.27403700  | 1.46103600  | H | 2.81058100  | -3.82557000 | 1.26186900  |
| H | 4.09535500  | 2.08937700  | 2.10883700  | H | 1.94044200  | -5.12203300 | 0.39394100  |
| H | 3.56432500  | 2.82584400  | 0.57750400  | H | 0.66638600  | -0.40026000 | 0.23081100  |
| H | 2.49004600  | 2.87823100  | 1.98990400  | C | 2.77163800  | -0.26243200 | 0.35289400  |
| C | 1.61050100  | 0.47416700  | 4.21660500  | C | 2.78811500  | -0.94255900 | 1.57570700  |
| H | 2.09807600  | -0.50972300 | 4.23819600  | C | 3.98765300  | -0.03926700 | -0.30217900 |
| H | 2.36515600  | 1.24022100  | 4.41687800  | C | 3.98167000  | -1.41006100 | 2.11853800  |
| H | 0.86696600  | 0.50780400  | 5.02153200  | H | 1.84468000  | -1.10752700 | 2.09208700  |
| C | -1.43345700 | -1.82083800 | 3.41834200  | C | 5.18361000  | -0.50867100 | 0.23728200  |
| H | -0.90408300 | -2.54675500 | 4.04666400  | H | 4.00085900  | 0.50207800  | -1.24381800 |
| H | -1.88932900 | -1.05295700 | 4.05093500  | C | 5.18400700  | -1.20294400 | 1.44465400  |
| H | -2.22861900 | -2.35947400 | 2.88627000  | H | 3.97319200  | -1.93765600 | 3.06789800  |

## TS13-2

|   |             |             |             |   |             |             |             |
|---|-------------|-------------|-------------|---|-------------|-------------|-------------|
| C | 1.45366000  | 0.22678300  | -0.19993300 | H | 6.11692500  | -0.32961100 | -0.28715000 |
| C | 1.40886700  | 0.11576100  | -1.74141900 | H | 6.11546300  | -1.57067500 | 1.86282600  |
| C | 0.01120900  | 0.11547600  | -2.29131500 | C | -2.85716600 | 3.13315800  | 2.36157100  |
| H | 1.92314700  | -0.79621700 | -2.05812000 | C | -3.53565300 | 2.55091500  | 1.11543500  |
| H | 1.94475300  | 0.95868500  | -2.18526000 | B | -1.33774500 | 1.75495400  | 1.27716600  |
| H | -0.26027900 | 0.90218300  | -2.99423100 | O | -1.48978800 | 2.91202100  | 2.13997000  |
| C | -1.03111300 | -0.60245500 | -1.95139900 | O | -2.68291900 | 1.49971100  | 0.71872900  |
| C | -2.39427000 | -0.52488400 | -1.69755700 | C | -0.64007900 | 2.74200600  | -0.90746200 |
| H | -2.69830900 | 0.32002700  | -1.08119400 | C | 0.23994300  | 3.39756300  | -1.71587700 |
|   |             |             |             | C | 1.61026200  | 3.46512700  | -1.24661100 |
|   |             |             |             | C | 2.03104000  | 2.71429800  | -0.20486300 |
|   |             |             |             | C | 1.12318000  | 1.65551800  | 0.36194500  |
|   |             |             |             | N | -0.29062400 | 1.98991900  | 0.16029000  |

|   |             |             |             |   |             |             |             |
|---|-------------|-------------|-------------|---|-------------|-------------|-------------|
| H | -1.71346700 | 2.80986300  | -1.07432800 | H | 4.25547100  | -2.92220300 | -0.39504100 |
| H | -0.09369500 | 3.99629400  | -2.55096600 | N | 4.52779700  | -0.98953800 | -1.20349300 |
| H | 3.01861500  | 2.84830600  | 0.22244900  | O | 1.05761700  | 1.51981900  | -0.24977600 |
| H | 1.28785300  | 1.57347100  | 1.44111600  | C | 4.24315000  | 2.89980900  | -0.97867400 |
| C | 2.50836000  | 4.42264800  | -1.84375800 | C | 4.05780700  | 3.28332800  | 0.50165300  |
| N | 3.22661200  | 5.17910700  | -2.34629300 | B | 2.24793300  | 2.14854200  | -0.23332200 |
| H | -3.20727000 | 2.60821500  | 3.26711800  | O | 2.96458300  | 2.42865200  | -1.38587100 |
| H | -3.05643800 | 4.20224400  | 2.49273300  | O | 2.91352000  | 2.54337000  | 0.91025500  |
| H | -3.60596900 | 3.31312800  | 0.32328500  | H | 4.97586900  | 2.08800200  | -1.09206400 |
| H | -4.54602200 | 2.17173000  | 1.31594900  | H | 4.55087000  | 3.73975900  | -1.60527100 |
| O | -0.85981100 | 0.54469700  | 2.02768500  | H | 3.85800900  | 4.35372100  | 0.62038600  |
| H | -1.06554900 | -1.94211800 | -0.04464000 | H | 4.91529100  | 3.01471900  | 1.12284000  |
| O | -1.74639200 | -1.61246500 | 1.08302400  | H | -1.10958200 | 1.30748100  | 0.32935900  |
| H | -1.42494100 | -0.68258000 | 1.40499600  | C | -3.12063500 | 1.67050100  | -0.11172800 |
| C | -1.55347100 | -2.55128700 | 2.13357700  | C | -3.28505100 | 2.34927800  | 1.10129900  |
| H | -1.68971300 | -3.55506100 | 1.72528600  | C | -4.14730600 | 1.75288200  | -1.05683700 |
| H | -0.54182000 | -2.48952800 | 2.54644500  | C | -4.43049100 | 3.09246700  | 1.36259700  |
| H | -2.28832900 | -2.38205100 | 2.92648800  | H | -2.49598700 | 2.28324300  | 1.84736000  |
| C | -1.27044300 | 0.48307700  | 3.38045900  | C | -5.29587000 | 2.49901700  | -0.80037100 |
| H | -2.35413400 | 0.30731700  | 3.45729500  | H | -4.06599100 | 1.22469400  | -2.00191800 |
| H | -0.74620300 | -0.34377600 | 3.86966700  | C | -5.44144500 | 3.17292600  | 0.40785800  |
| H | -1.03156000 | 1.41845500  | 3.89111000  | H | -4.53295000 | 3.61102100  | 2.31072700  |

**TS13-3**

|   |             |             |             |   |             |             |             |
|---|-------------|-------------|-------------|---|-------------|-------------|-------------|
| C | -1.86317300 | 0.84029700  | -0.29694400 | H | -6.08025400 | 2.54894300  | -1.54907100 |
| C | -1.35397200 | 0.88954200  | -1.75227200 | H | -6.33628000 | 3.75426600  | 0.60532900  |
| C | -0.18073600 | -0.00918600 | -2.04626800 | C | -0.19346300 | -2.76736100 | 3.25701300  |
| H | -1.07667300 | 1.92467600  | -1.97436800 | C | 1.25898300  | -2.79706600 | 2.75911700  |
| H | -2.14851000 | 0.60328800  | -2.44395500 | B | 0.03005400  | -1.10001700 | 1.73241300  |
| H | -0.35156200 | -0.85087000 | -2.72139200 | O | -0.61396200 | -1.45681000 | 2.97939800  |
| C | 1.02674200  | -0.06694600 | -1.56085000 | O | 1.26903200  | -1.89636600 | 1.66801400  |
| C | 2.13903000  | -0.77941000 | -1.17531700 | C | -0.62681300 | -2.46624800 | -0.28801400 |
| H | 1.99942800  | -1.47300500 | -0.34693900 | C | -1.47917400 | -2.96538000 | -1.22205700 |
| C | 3.39417500  | -0.48054900 | -1.67306100 | C | -2.81232300 | -2.39346300 | -1.24608600 |
| H | 3.49114400  | 0.22898700  | -2.49099800 | C | -3.13755400 | -1.33816600 | -0.47241100 |
| C | 5.79895300  | -0.77292600 | -1.87326900 | C | -2.09381600 | -0.59045500 | 0.31594600  |
| H | 6.17848300  | -1.71173900 | -2.28946400 | N | -0.85627400 | -1.37687400 | 0.48575400  |
| H | 5.66708600  | -0.05560400 | -2.68414600 | H | 0.32873100  | -2.94631000 | -0.10014900 |
| H | 6.53456700  | -0.38166800 | -1.16451100 | H | -1.23944400 | -3.84824900 | -1.79619700 |
| C | 4.51729700  | -1.90948800 | -0.07016200 | H | -4.15885300 | -0.97648500 | -0.42688900 |
| H | 3.78782200  | -1.58284900 | 0.67541700  | H | -2.48136700 | -0.38842600 | 1.32580200  |
| H | 5.51269300  | -1.92357100 | 0.37558200  | C | -3.83072300 | -3.02186700 | -2.05109800 |
|   |             |             |             | N | -4.63114200 | -3.52686500 | -2.71826000 |
|   |             |             |             | H | -0.28596400 | -2.98299900 | 4.32653400  |
|   |             |             |             | H | -0.79817300 | -3.50153900 | 2.70020700  |
|   |             |             |             | H | 1.57783700  | -3.79744000 | 2.44030200  |

|   |            |             |            |   |             |            |             |
|---|------------|-------------|------------|---|-------------|------------|-------------|
| H | 1.94763800 | -2.44733700 | 3.54328500 | C | -3.62401700 | 1.08639800 | -0.89941200 |
| H | 0.75621600 | 1.00427300  | 0.67202300 | C | -3.71114400 | 2.47694600 | 1.50857800  |
| O | 0.33546300 | 0.36672200  | 1.75795000 | H | -1.87211700 | 1.44532800 | 1.97887900  |
| C | 1.03680300 | 0.79844300  | 2.91692200 | C | -4.67820100 | 1.95830100 | -0.63505100 |
| H | 1.30209700 | 1.84938300  | 2.78357100 | H | -3.59905200 | 0.54502200 | -1.84132600 |
| H | 0.40293300 | 0.66901500  | 3.79527200 | C | -4.72330000 | 2.66024100 | 0.56771200  |
| H | 1.95439500 | 0.21216300  | 3.04324800 | H | -3.74293800 | 3.01208900 | 2.45337100  |

**TS14**

|   |             |             |             |               |             |             |             |
|---|-------------|-------------|-------------|---------------|-------------|-------------|-------------|
| C | -1.46875800 | -0.07444900 | -0.18882800 | B             | 0.30382200  | -1.88447000 | 1.78389400  |
| C | -1.00684800 | -0.11447600 | -1.66010600 | O             | 0.83518400  | -3.08098400 | 2.41965100  |
| C | 0.39919200  | -0.61762100 | -1.81267300 | O             | 1.49395500  | -1.12824500 | 1.31856400  |
| H | -1.06836900 | 0.88981600  | -2.08597000 | C             | -0.29172400 | -3.25379300 | -0.22473400 |
| H | -1.66787100 | -0.76360200 | -2.23996000 | C             | -1.06124900 | -3.70657000 | -1.25723900 |
| H | 0.54719100  | -1.61082600 | -2.24061700 | C             | -2.42398700 | -3.21433300 | -1.29769700 |
| C | 1.52774200  | -0.07332500 | -1.45311600 | C             | -2.84115000 | -2.22031800 | -0.48190600 |
| C | 2.89145200  | -0.15946800 | -1.21399000 | C             | -1.85592900 | -1.48352100 | 0.38347400  |
| H | 3.19291400  | -0.53906300 | -0.24494500 | N             | -0.65611600 | -2.28266200 | 0.63665500  |
| C | 3.78404300  | 0.39922100  | -2.09781500 | H             | 0.67798500  | -3.69684400 | -0.00973100 |
| H | 3.42450100  | 0.78301900  | -3.05005400 | H             | -0.74372000 | -4.52331000 | -1.88853200 |
| C | 6.00353000  | 1.00577500  | -2.90369300 | H             | -3.88186600 | -1.91483400 | -0.45927400 |
| H | 6.71364800  | 0.22452100  | -3.19360700 | H             | -2.31862300 | -1.26303800 | 1.35116300  |
| H | 5.43522500  | 1.30604100  | -3.78455200 | C             | -3.37446800 | -3.84999500 | -2.17758500 |
| H | 6.56281300  | 1.86978300  | -2.53258000 | N             | -4.12436400 | -4.35232300 | -2.90288300 |
| C | 5.65070000  | 0.10993000  | -0.60154000 | H             | 2.00899600  | -2.24000500 | 3.90622200  |
| H | 5.09232300  | 0.58523400  | 0.21147600  | H             | 2.72989300  | -3.60944700 | 3.03445600  |
| H | 6.69475600  | 0.41973600  | -0.55496400 | H             | 3.21053000  | -2.26336800 | 1.10262400  |
| H | 5.59339800  | -0.97733100 | -0.47930800 | H             | 3.30022400  | -0.96936800 | 2.32283800  |
| N | 5.09315200  | 0.51880900  | -1.88315100 | O             | -0.42097400 | -1.00188800 | 2.73335900  |
| O | 1.11693500  | 1.59758300  | -0.56669600 | H             | 1.68496800  | 1.52107900  | 0.31963000  |
| C | -1.48599000 | 4.01808100  | -0.94416700 | H             | -0.94183000 | -1.54921900 | 3.33077800  |
| C | -0.84214500 | 4.40349500  | 0.40757900  | O             | 2.45390300  | 1.63391700  | 1.51462500  |
| B | 0.21083300  | 2.61309500  | -0.47888900 | H             | 2.03671600  | 1.11177400  | 2.27148300  |
| O | -0.62865200 | 3.00818500  | -1.48316900 | H             | 2.32992400  | 2.55404600  | 1.78387300  |
| O | 0.11605500  | 3.37640700  | 0.66386700  | O             | 1.37694200  | 0.64358800  | 3.65458100  |
| H | -1.53318300 | 4.85708000  | -1.64253400 | H             | 0.64145000  | 0.03351500  | 3.35336700  |
| H | -2.48682100 | 3.59796900  | -0.81094800 | H             | 1.97536200  | 0.07909000  | 4.15446000  |
| H | -1.57474100 | 4.42486000  | 1.21793100  |               |             |             |             |
| H | -0.32467400 | 5.36757000  | 0.36377200  |               |             |             |             |
| H | -0.62528600 | 0.23832600  | 0.43699700  | <b>TS14-2</b> |             |             |             |
| C | -2.59912600 | 0.90061800  | 0.03431500  |               |             |             |             |
| C | -2.65956800 | 1.60265700  | 1.24427500  | C             | 1.36392200  | 0.21170000  | -0.14909600 |



|   |             |             |             |             |             |             |             |
|---|-------------|-------------|-------------|-------------|-------------|-------------|-------------|
| H | 3.86132900  | -1.37036500 | 0.75031000  | H           | -0.72511800 | -3.51082600 | 2.69278100  |
| H | 5.57270300  | -1.76091400 | 0.42106200  | H           | 1.62687500  | -3.81806600 | 2.30073300  |
| H | 4.27225100  | -2.73055100 | -0.31501800 | H           | 2.07214700  | -2.53057100 | 3.44733800  |
| N | 4.58042700  | -0.80997500 | -1.14375300 | O           | 0.33698500  | 0.37523300  | 1.79990600  |
| O | 1.06811800  | 1.62191200  | -0.16233800 | H           | 0.76572100  | 1.08951600  | 0.72870700  |
| C | 4.36144800  | 2.88177100  | -0.60401400 | H           | 0.76110200  | 0.58462600  | 2.63971800  |
| C | 4.19717500  | 2.91799300  | 0.92965500  |             |             |             |             |
| B | 2.31069700  | 2.13766800  | -0.03147100 |             |             |             |             |
| O | 3.05928700  | 2.59137100  | -1.09893300 | <b>TS15</b> |             |             |             |
| O | 2.98393400  | 2.21318900  | 1.16883800  |             |             |             |             |
| H | 5.04767000  | 2.08195300  | -0.91489500 | C           | 1.48164500  | -0.82364300 | -0.65573800 |
| H | 4.71650000  | 3.82744200  | -1.01942200 | C           | 1.47603800  | -0.38149300 | -2.11926900 |
| H | 4.09994600  | 3.94234300  | 1.30455600  | C           | 0.09088400  | -0.18181900 | -2.67646200 |
| H | 5.01955400  | 2.42817500  | 1.45663100  | H           | 1.96207900  | -1.14410000 | -2.73657100 |
| H | -1.11047500 | 1.33326500  | 0.42416000  | H           | 2.05405200  | 0.54327400  | -2.25282200 |
| C | -3.12491300 | 1.68210900  | -0.00643500 | H           | -0.03320700 | -0.32339700 | -3.75221500 |
| C | -3.29161800 | 2.34022700  | 1.21733900  | C           | -1.02613700 | 0.09451400  | -2.06202000 |
| C | -4.15406500 | 1.77053600  | -0.94801400 | C           | -2.36597500 | 0.18884100  | -1.88368900 |
| C | -4.44215600 | 3.06976800  | 1.49308700  | H           | -2.84929100 | 1.15519600  | -1.80039100 |
| H | -2.50031200 | 2.26729500  | 1.96041400  | C           | -3.02014400 | -0.98537100 | -1.48629900 |
| C | -5.30800800 | 2.50317100  | -0.67695000 | H           | -2.46474600 | -1.91710400 | -1.52262000 |
| H | -4.06945800 | 1.25723800  | -1.90117900 | C           | -4.86179600 | -2.33393400 | -0.68592400 |
| C | -5.45589300 | 3.15699500  | 0.54202400  | H           | -5.74797400 | -2.52346100 | -1.29849200 |
| H | -4.54697500 | 3.57175200  | 2.44995500  | H           | -4.13981900 | -3.13640300 | -0.83616200 |
| H | -6.09457300 | 2.55972800  | -1.42306500 | H           | -5.15141200 | -2.31200200 | 0.36806500  |
| H | -6.35507800 | 3.72751400  | 0.75133600  | C           | -5.05911500 | 0.14628600  | -0.86789700 |
| C | -0.08772700 | -2.80063800 | 3.24411500  | H           | -4.49373500 | 0.82715400  | -0.22590300 |
| C | 1.34153200  | -2.82824000 | 2.67996200  | H           | -5.99764800 | -0.12850100 | -0.38741600 |
| B | 0.07692300  | -1.09458900 | 1.75781800  | H           | -5.27682200 | 0.61368300  | -1.83272400 |
| O | -0.50705100 | -1.47768600 | 3.02676500  | N           | -4.26070700 | -1.06236800 | -1.05841800 |
| O | 1.32082300  | -1.87657200 | 1.63415900  | O           | -1.31641700 | -1.27503000 | 0.63906100  |
| C | -0.60569800 | -2.40892100 | -0.29663100 | H           | 0.66864500  | -1.54285600 | -0.51255100 |
| C | -1.46761400 | -2.87986300 | -1.23805000 | C           | 2.77210900  | -1.48326000 | -0.21938800 |
| C | -2.81249000 | -2.33761600 | -1.20364700 | C           | 2.73733500  | -2.33195200 | 0.89267500  |
| C | -3.13738300 | -1.31693200 | -0.38384600 | C           | 4.00064600  | -1.25126200 | -0.84197900 |
| C | -2.08086300 | -0.57465200 | 0.39364100  | C           | 3.89541300  | -2.93664800 | 1.36688300  |
| N | -0.84373000 | -1.36474400 | 0.53244200  | H           | 1.78268500  | -2.51221400 | 1.38268000  |
| H | 0.36309500  | -2.87699900 | -0.14897600 | C           | 5.16387400  | -1.85628700 | -0.36903900 |
| H | -1.22363600 | -3.73209900 | -1.85522400 | H           | 4.05836300  | -0.58846500 | -1.70100500 |
| H | -4.16450000 | -0.98134400 | -0.29341100 | C           | 5.11505100  | -2.70086100 | 0.73497200  |
| H | -2.44979200 | -0.38474400 | 1.41227600  | H           | 3.84717900  | -3.59404900 | 2.22926700  |
| C | -3.84168000 | -2.96300600 | -1.99733700 | H           | 6.10975000  | -1.66305900 | -0.86516600 |
| N | -4.65221900 | -3.46373800 | -2.65545100 | H           | 6.02094000  | -3.17193000 | 1.10240300  |
| H | -0.13452500 | -3.04899700 | 4.30954500  | C           | -1.51626700 | 1.45105800  | 2.87768000  |

|   |             |             |             |   |             |             |             |
|---|-------------|-------------|-------------|---|-------------|-------------|-------------|
| C | -2.86895100 | 1.43755700  | 2.15201600  | H | -4.66999100 | 0.71995200  | -0.14022600 |
| B | -1.29020600 | 0.12198500  | 1.02417800  | H | -6.13076800 | -0.20508300 | -0.62135800 |
| O | -0.87743000 | 0.29340800  | 2.40972900  | H | -5.15157400 | 0.59231100  | -1.86590000 |
| O | -2.60013800 | 0.80025000  | 0.91892900  | N | -4.30872500 | -1.13156900 | -1.01914000 |
| C | -0.45103100 | 2.17359400  | -0.21558600 | O | -1.20466100 | -1.70442500 | 0.51308700  |
| C | 0.50847600  | 3.10271300  | -0.38916700 | H | 0.76859200  | -1.59940000 | -0.56477100 |
| C | 1.89225800  | 2.69972700  | -0.16746100 | C | 2.85328800  | -1.31717400 | -0.26072400 |
| C | 2.19086600  | 1.43674400  | 0.18001300  | C | 2.91453700  | -2.18630000 | 0.83425300  |
| C | 1.14237800  | 0.36192700  | 0.29259700  | C | 4.04710900  | -0.95025900 | -0.88548900 |
| N | -0.24132500 | 0.83197400  | 0.04460200  | C | 4.13121000  | -2.67953100 | 1.28962300  |
| H | -1.50192700 | 2.43504400  | -0.29492700 | H | 1.98696000  | -2.47128200 | 1.32655400  |
| H | 0.26566300  | 4.12785200  | -0.63069900 | C | 5.26967900  | -1.44272900 | -0.43119700 |
| H | 3.21443100  | 1.14771200  | 0.39742000  | H | 4.03159000  | -0.27170400 | -1.73393700 |
| H | 1.17104300  | -0.03823500 | 1.31678600  | C | 5.31574100  | -2.30911400 | 0.65548300  |
| C | 2.94016000  | 3.68178300  | -0.28144400 | H | 4.15630300  | -3.35434900 | 2.13948500  |
| N | 3.77084400  | 4.48109300  | -0.38830700 | H | 6.18684600  | -1.14537900 | -0.92999800 |
| H | -1.61536800 | 1.42304400  | 3.96810400  | H | 6.26759100  | -2.69266300 | 1.00842900  |
| H | -0.94839900 | 2.35587000  | 2.60468500  | C | -1.61447000 | 0.74166200  | 3.02464700  |
| H | -3.27135300 | 2.44612900  | 1.98964600  | C | -2.98258200 | 0.69674900  | 2.32571900  |
| H | -3.61158600 | 0.85857200  | 2.72323100  | B | -1.33186500 | -0.35990300 | 1.03512100  |
| C | -2.09963100 | -2.07018200 | 1.48711600  | O | -0.89606600 | -0.30419100 | 2.42458600  |
| H | -2.19304100 | -3.07265200 | 1.04949800  | O | -2.71326600 | 0.17411100  | 1.04099800  |
| H | -1.65616400 | -2.16214100 | 2.48517200  | C | -0.81113700 | 1.92406500  | 0.03569400  |
| H | -3.10962800 | -1.64500400 | 1.60939200  | C | 0.00214100  | 2.99212400  | -0.07346800 |

**TS16**

|   |             |             |             |
|---|-------------|-------------|-------------|
| C | 1.49621000  | -0.79008800 | -0.67703900 |
| C | 1.44632800  | -0.30467900 | -2.12389700 |
| C | 0.05060200  | -0.18092000 | -2.67516400 |
| H | 1.98146800  | -1.01245200 | -2.76552000 |
| H | 1.95548200  | 0.66267300  | -2.23464600 |
| H | -0.05939300 | -0.30379400 | -3.75546900 |
| C | -1.09260200 | 0.01340000  | -2.07962400 |
| C | -2.44068700 | 0.08999000  | -1.94555200 |
| H | -2.92786200 | 1.05800300  | -1.90874400 |
| C | -3.07621500 | -1.06401900 | -1.47200400 |
| H | -2.48654100 | -1.97070100 | -1.39356000 |
| C | -4.69310900 | -2.24771200 | -0.16716300 |
| H | -5.72493500 | -2.53955900 | -0.37341200 |
| H | -4.02855400 | -3.09157900 | -0.35143100 |
| H | -4.58932500 | -1.93708300 | 0.87821100  |
| C | -5.11635300 | 0.07526500  | -0.90521000 |

**TS17**

|   |             |            |             |
|---|-------------|------------|-------------|
| C | -1.10472400 | 0.50558600 | -1.31177700 |
|---|-------------|------------|-------------|

|   |             |             |             |               |             |             |             |
|---|-------------|-------------|-------------|---------------|-------------|-------------|-------------|
| C | 0.20628200  | 1.11607900  | -1.82756500 | H             | -0.88257500 | 1.80783700  | 0.32313200  |
| C | 1.33150500  | 1.12618600  | -0.76135300 | O             | 1.02242700  | 3.89702200  | -0.06409200 |
| H | 0.00561400  | 2.15880100  | -2.08386100 | H             | -0.05846400 | 3.70365400  | -0.20286800 |
| H | 0.53633400  | 0.59134300  | -2.72846600 | C             | -2.10084800 | 4.04841100  | 0.48973600  |
| H | 2.31438600  | 1.10620100  | -1.23204500 | H             | -1.57925400 | 4.90072800  | 0.96055200  |
| C | 1.23043100  | 0.09898400  | 0.30149200  | H             | -3.01080700 | 4.45622700  | 0.01471300  |
| C | 2.35856000  | -0.57485800 | 0.85720200  | H             | -2.45596700 | 3.41423400  | 1.33319600  |
| H | 2.25053600  | -1.05647500 | 1.81952600  | C             | 1.49340600  | 4.44796600  | -1.25313600 |
| C | 3.58943100  | -0.57474600 | 0.25105000  | H             | 2.06853300  | 3.71862200  | -1.85995300 |
| H | 3.72005000  | -0.11722000 | -0.72416800 | H             | 0.67007900  | 4.80691300  | -1.89042200 |
| C | 5.95985100  | -1.10121500 | 0.02564400  | H             | 2.16579900  | 5.29775300  | -1.06528500 |
| H | 6.30457500  | -2.12029500 | -0.17537400 |               |             |             |             |
| H | 5.82404100  | -0.58397800 | -0.92431800 |               |             |             |             |
| H | 6.72657700  | -0.57610000 | 0.60312500  | <b>TS17-2</b> |             |             |             |
| C | 4.68240600  | -1.75591200 | 2.05852400  |               |             |             |             |
| H | 4.35986100  | -1.04455300 | 2.82578800  | C             | 1.18435800  | -1.15477200 | 0.70650400  |
| H | 5.68575300  | -2.10504000 | 2.30020000  | C             | -0.04574200 | -2.04256200 | 0.40267700  |
| H | 3.99973800  | -2.61296800 | 2.06225700  | C             | -1.34917800 | -1.38463300 | 0.88206500  |
| N | 4.70181400  | -1.12117500 | 0.75259800  | H             | 0.07953300  | -3.01837100 | 0.87824800  |
| H | -1.93900700 | 1.11016100  | -1.67835900 | H             | -0.09058400 | -2.21620200 | -0.67936200 |
| C | -1.32788900 | -0.95435300 | -1.64312300 | H             | -2.21296800 | -2.04413400 | 0.81074500  |
| C | -2.63081100 | -1.46221500 | -1.67371900 | C             | -1.55680300 | -0.10991500 | 0.19536400  |
| C | -0.26734100 | -1.84342600 | -1.84632100 | C             | -2.82152100 | 0.35683100  | -0.29077000 |
| C | -2.86929100 | -2.81523100 | -1.89000900 | H             | -2.96076400 | 1.42177400  | -0.42685600 |
| H | -3.46759500 | -0.78375500 | -1.52693700 | C             | -3.86704400 | -0.49365900 | -0.51935700 |
| C | -0.50120900 | -3.19922000 | -2.06209600 | H             | -3.72055700 | -1.56624200 | -0.43371200 |
| H | 0.75659500  | -1.47636500 | -1.83988200 | C             | -6.11471100 | -1.11274000 | -1.23994500 |
| C | -1.80289100 | -3.69036500 | -2.08190000 | H             | -6.35223800 | -1.04803400 | -2.30772900 |
| H | -3.88910700 | -3.18569400 | -1.91192400 | H             | -5.73995000 | -2.11452000 | -1.02742000 |
| H | 0.33635300  | -3.87174000 | -2.22009100 | H             | -7.03299600 | -0.95597700 | -0.66643200 |
| H | -1.98656300 | -4.74600600 | -2.25326600 | C             | -5.44911900 | 1.27103400  | -1.01057000 |
| C | -0.30844900 | -1.22820000 | 1.59598700  | H             | -5.18447200 | 1.81793100  | -0.10037700 |
| C | -1.53553000 | -1.42346800 | 2.08840400  | H             | -6.52196700 | 1.36634800  | -1.17817300 |
| C | -2.61641200 | -0.48770500 | 1.78412200  | H             | -4.91729900 | 1.72122900  | -1.85797800 |
| C | -2.39901700 | 0.48936600  | 0.88754000  | N             | -5.11339800 | -0.13188900 | -0.86541900 |
| C | -1.09087000 | 0.71038000  | 0.23100900  | H             | 1.59939400  | -1.46543700 | 1.67261000  |
| N | 0.00490700  | -0.11904400 | 0.78596700  | C             | 2.26010700  | -1.32515800 | -0.34569900 |
| H | 0.48075300  | -1.95290600 | 1.73022800  | C             | 3.33093300  | -2.19087900 | -0.11953100 |
| H | -1.73993800 | -2.30732900 | 2.67905200  | C             | 2.19268900  | -0.65055900 | -1.56938100 |
| H | -3.17593800 | 1.19238300  | 0.60080000  | C             | 4.31167500  | -2.38430500 | -1.08970700 |
| C | -3.89485300 | -0.66372100 | 2.41408400  | H             | 3.39749800  | -2.71543600 | 0.83050700  |
| N | -4.91822400 | -0.83218500 | 2.92801100  | C             | 3.17188500  | -0.83777300 | -2.53869700 |
| H | 1.28478500  | 2.13165400  | -0.25000500 | H             | 1.37141600  | 0.03729900  | -1.76046300 |
| O | -1.30180800 | 3.35807700  | -0.40517600 | C             | 4.23469200  | -1.70755700 | -2.30264300 |



|   |             |             |             |   |             |             |             |
|---|-------------|-------------|-------------|---|-------------|-------------|-------------|
| H | 5.13892600  | -3.05911900 | -0.89361700 | N | -4.63801400 | 0.68923700  | 0.76371100  |
| H | 3.10919400  | -0.29891700 | -3.47887200 | H | 2.01385000  | -1.10902300 | -1.98771200 |
| H | 5.00077800  | -1.85039400 | -3.05773000 | C | 1.39539000  | 0.89511400  | -1.51023900 |
| C | -0.43362200 | 1.81630500  | -0.71754900 | C | 2.69461000  | 1.39697800  | -1.37824100 |
| C | 0.57846300  | 2.69153900  | -0.67725600 | C | 0.33723500  | 1.80859300  | -1.55763800 |
| C | 1.72192500  | 2.45936200  | 0.19816500  | C | 2.93116000  | 2.76421000  | -1.28587500 |
| C | 1.78997700  | 1.30139600  | 0.88705200  | H | 3.53042000  | 0.70217300  | -1.34879200 |
| C | 0.71319200  | 0.30838000  | 0.93422400  | C | 0.56909000  | 3.17876700  | -1.46346800 |
| N | -0.46845600 | 0.66757400  | 0.09367900  | H | -0.68279300 | 1.44945100  | -1.67304800 |
| H | -1.24297300 | 1.90903300  | -1.42799700 | C | 1.86638900  | 3.66151200  | -1.32426400 |
| H | 0.57489500  | 3.54491900  | -1.34370100 | H | 3.94831900  | 3.12942600  | -1.18634500 |
| H | 2.66762900  | 1.06679400  | 1.48333600  | H | -0.26705800 | 3.87023900  | -1.50360300 |
| H | 0.25909400  | 0.25077200  | 2.03396200  | H | 2.04841200  | 4.72895400  | -1.25359600 |
| C | 2.78001000  | 3.42592000  | 0.24837400  | C | 0.32425200  | 0.43449900  | 1.71209200  |
| N | 3.62371400  | 4.21901700  | 0.27041300  | C | 1.53941400  | 0.49922500  | 2.26484500  |
| H | -1.18570200 | -1.05341800 | 2.02654700  | C | 2.62306900  | -0.34834600 | 1.77060800  |
| O | -0.58897700 | -0.28828800 | 3.16904000  | C | 2.41868800  | -1.07978300 | 0.66181600  |
| C | 0.20417600  | -1.04615800 | 4.00838000  | C | 1.12725000  | -1.13984800 | -0.05103500 |
| H | 0.30444700  | -2.10502100 | 3.68124700  | N | 0.02535400  | -0.44818400 | 0.65547000  |
| H | 1.24082600  | -0.65825000 | 4.08716900  | H | -0.46673200 | 1.11225100  | 1.99712300  |
| H | -0.18040800 | -1.08380800 | 5.04280900  | H | 1.73175800  | 1.21657100  | 3.05236900  |

**TS18**

|   |             |             |             |
|---|-------------|-------------|-------------|
| C | 1.16987000  | -0.60180500 | -1.51099200 |
| C | -0.12798400 | -1.08011300 | -2.17365400 |
| C | -1.29213600 | -1.25425200 | -1.16733400 |
| H | 0.06765800  | -2.06653000 | -2.59976000 |
| H | -0.41133500 | -0.39451700 | -2.97789200 |
| H | -2.25965700 | -1.07788300 | -1.63917100 |
| C | -1.18961000 | -0.51871500 | 0.10375400  |
| C | -2.32267700 | 0.02200600  | 0.79224300  |
| H | -2.24190100 | 0.19776200  | 1.85672600  |
| C | -3.51517200 | 0.26654800  | 0.16624100  |
| H | -3.60515700 | 0.13584800  | -0.90762500 |
| C | -5.83263400 | 1.01362000  | 0.00520900  |
| H | -6.07371200 | 2.07824000  | 0.09294900  |
| H | -5.67090300 | 0.77863100  | -1.04712300 |
| H | -6.68417700 | 0.42904600  | 0.36605300  |
| C | -4.66720300 | 0.89542800  | 2.19956200  |
| H | -4.37271900 | -0.02069000 | 2.72140200  |
| H | -5.67958100 | 1.16277100  | 2.50146700  |
| H | -3.98590600 | 1.70257900  | 2.49369500  |

|   |             |             |             |
|---|-------------|-------------|-------------|
| N | -4.63801400 | 0.68923700  | 0.76371100  |
| H | 2.01385000  | -1.10902300 | -1.98771200 |
| C | 1.39539000  | 0.89511400  | -1.51023900 |
| C | 2.69461000  | 1.39697800  | -1.37824100 |
| C | 0.33723500  | 1.80859300  | -1.55763800 |
| C | 2.93116000  | 2.76421000  | -1.28587500 |
| H | 3.53042000  | 0.70217300  | -1.34879200 |
| C | 0.56909000  | 3.17876700  | -1.46346800 |
| H | -0.68279300 | 1.44945100  | -1.67304800 |
| C | 1.86638900  | 3.66151200  | -1.32426400 |
| H | 3.94831900  | 3.12942600  | -1.18634500 |
| H | -0.26705800 | 3.87023900  | -1.50360300 |
| H | 2.04841200  | 4.72895400  | -1.25359600 |
| C | 0.32425200  | 0.43449900  | 1.71209200  |
| C | 1.53941400  | 0.49922500  | 2.26484500  |
| C | 2.62306900  | -0.34834600 | 1.77060800  |
| C | 2.41868800  | -1.07978300 | 0.66181600  |
| C | 1.12725000  | -1.13984800 | -0.05103500 |
| N | 0.02535400  | -0.44818400 | 0.65547000  |
| H | -0.46673200 | 1.11225100  | 1.99712300  |
| H | 1.73175800  | 1.21657100  | 3.05236900  |
| H | 3.19662400  | -1.70980500 | 0.23946700  |
| C | 3.88593400  | -0.35072900 | 2.45377600  |
| N | 4.89854700  | -0.33186100 | 3.01461300  |
| H | -1.32118300 | -2.37249500 | -0.89766500 |
| O | 1.20647700  | -3.60068200 | -1.16166300 |
| H | 0.93884900  | -2.25476700 | -0.21941700 |
| H | 1.72051400  | -4.27046500 | -0.69731800 |
| O | -1.14988000 | -4.04877500 | -0.83914000 |
| H | -1.49277800 | -4.42743000 | -1.65553400 |
| H | -0.04440500 | -3.93649600 | -1.00121800 |

**TS18-2**

|   |             |             |             |
|---|-------------|-------------|-------------|
| C | 1.21237800  | -1.04311500 | 1.07642300  |
| C | -0.00557800 | -1.98191400 | 0.89815200  |
| C | -1.31941100 | -1.28058100 | 1.26852600  |
| H | 0.13236500  | -2.87996100 | 1.50634000  |
| H | -0.03518100 | -2.30940700 | -0.14857100 |
| H | -2.17978700 | -1.94597300 | 1.32198600  |
| C | -1.54446400 | -0.12584700 | 0.41923300  |
| C | -2.82500800 | 0.26717100  | -0.10688300 |
| H | -2.98631800 | 1.31384800  | -0.33411100 |

|   |             |             |             |
|---|-------------|-------------|-------------|
| C | -3.84127400 | -0.62675500 | -0.27000500 |
| H | -3.65984500 | -1.68493600 | -0.10156000 |
| C | -6.02823700 | -1.37262200 | -1.04650700 |
| H | -6.13821200 | -1.41096800 | -2.13732400 |
| H | -5.66116200 | -2.33996000 | -0.70056800 |
| H | -7.01225800 | -1.19693600 | -0.60267100 |
| C | -5.47244000 | 1.04210800  | -0.91030900 |
| H | -5.19676700 | 1.67619900  | -0.06259500 |
| H | -6.55162500 | 1.10176800  | -1.05552800 |
| H | -4.97225500 | 1.42346700  | -1.81067400 |
| N | -5.10446700 | -0.33209200 | -0.63828200 |
| H | 1.60845600  | -1.18974600 | 2.08936000  |
| C | 2.30838400  | -1.38086300 | 0.08766800  |
| C | 3.35051900  | -2.23258600 | 0.45558700  |
| C | 2.28377400  | -0.87885700 | -1.21750300 |
| C | 4.34604900  | -2.57968000 | -0.45448600 |
| H | 3.38353500  | -2.62391200 | 1.46978900  |
| C | 3.27718300  | -1.22097200 | -2.12829400 |
| H | 1.48434300  | -0.20391900 | -1.51795200 |
| C | 4.31191300  | -2.07398300 | -1.75002600 |
| H | 5.15184100  | -3.23940500 | -0.14803400 |
| H | 3.24782900  | -0.81522000 | -3.13473000 |
| H | 5.09003700  | -2.33630900 | -2.45959400 |
| C | -0.46592400 | 1.66580700  | -0.77473500 |
| C | 0.52471200  | 2.56131500  | -0.87007100 |
| C | 1.68276000  | 2.47755600  | 0.01142700  |
| C | 1.78344500  | 1.41860300  | 0.84620400  |
| C | 0.73204900  | 0.43186200  | 1.05082100  |
| N | -0.46800300 | 0.64241900  | 0.19177400  |
| H | -1.28556000 | 1.63880400  | -1.47927500 |
| H | 0.49270600  | 3.31246200  | -1.64963500 |
| H | 2.68018300  | 1.28035600  | 1.44520600  |
| H | 0.26729200  | 0.52968600  | 2.20361500  |
| C | 2.72028600  | 3.46070200  | -0.08321100 |
| N | 3.54916500  | 4.26455200  | -0.17883900 |
| H | -1.12379200 | -0.73937700 | 2.38401700  |
| O | -0.58339600 | 0.20113000  | 3.28207400  |
| H | -0.09222000 | -0.15784200 | 4.03126900  |

**TS19**

|   |             |             |             |
|---|-------------|-------------|-------------|
| C | -1.58470000 | 0.05387200  | -1.27594300 |
| C | -1.14567200 | -1.25050500 | -1.97730800 |

|   |             |             |             |
|---|-------------|-------------|-------------|
| C | 0.23982300  | -1.05127200 | -2.59919300 |
| H | -1.88839700 | -1.54163000 | -2.72483000 |
| H | -1.09382800 | -2.05890900 | -1.23946400 |
| H | 0.55422200  | -1.91372700 | -3.18920800 |
| C | 1.22105600  | -0.80818600 | -1.48949500 |
| C | 2.52284900  | -1.24650700 | -1.46493300 |
| H | 2.98421700  | -1.49241200 | -2.41737900 |
| C | 3.32906900  | -1.08617500 | -0.30593400 |
| H | 4.34973100  | -0.71540800 | -0.41767400 |
| C | 3.96715000  | -1.52574400 | 1.98152700  |
| H | 4.04941800  | -2.39594900 | 2.63598900  |
| H | 4.97176300  | -1.22836700 | 1.66811800  |
| H | 3.53295200  | -0.69539400 | 2.55653200  |
| C | 1.98824100  | -2.65907000 | 0.98698700  |
| H | 1.81701300  | -3.24898300 | 0.08214000  |
| H | 1.08592900  | -2.05182400 | 1.15861900  |
| H | 2.12733800  | -3.32754400 | 1.83830500  |
| N | 3.19183900  | -1.87420100 | 0.80847300  |
| H | -2.05911700 | 0.70046500  | -2.02390900 |
| C | -2.61343400 | -0.24927600 | -0.19716100 |
| C | -3.95541400 | -0.40309200 | -0.54905800 |
| C | -2.23903100 | -0.44428600 | 1.13394200  |
| C | -4.90743600 | -0.74434200 | 0.40739500  |
| H | -4.25668500 | -0.24719100 | -1.58245200 |
| C | -3.18868100 | -0.78720300 | 2.09158900  |
| H | -1.19980400 | -0.30543300 | 1.42319700  |
| C | -4.52546000 | -0.93911800 | 1.73169700  |
| H | -5.94824200 | -0.85184800 | 0.11885000  |
| H | -2.88470100 | -0.92839900 | 3.12398500  |
| H | -5.26600900 | -1.20040000 | 2.48050200  |
| C | 1.73216600  | 0.50499000  | 0.47267800  |
| C | 1.74809700  | 1.89632000  | 0.68538100  |
| C | 0.80835200  | 2.73065400  | 0.11535600  |
| C | -0.34796000 | 2.13121700  | -0.49841400 |
| C | -0.37684900 | 0.80603100  | -0.75497500 |
| N | 0.80104300  | 0.05226900  | -0.52295800 |
| H | 1.89252400  | -0.13153600 | 1.33404600  |
| H | 2.49195500  | 2.30467200  | 1.36340600  |
| H | -1.23092800 | 2.73168500  | -0.68979500 |
| C | 0.87722600  | 4.14637600  | 0.29314200  |
| N | 0.93000300  | 5.29665500  | 0.43413300  |
| H | 0.21409700  | -0.17302600 | -3.26020400 |

**TS20**

|   |             |             |             |               |             |             |             |
|---|-------------|-------------|-------------|---------------|-------------|-------------|-------------|
| C | -1.95061900 | -0.16141500 | -1.51239000 | H             | 2.80569800  | -1.33843700 | 0.72793600  |
| C | -1.35865500 | -1.49770500 | -2.01120500 | O             | 0.58335700  | -0.32655200 | 1.88028900  |
| C | -0.09716600 | -1.28908500 | -2.86130900 | H             | 1.37092700  | -1.52294900 | 1.91589500  |
| H | -2.12717600 | -2.03447600 | -2.57375900 | O             | 1.97229800  | -2.30469200 | 1.58239200  |
| H | -1.10225900 | -2.11435600 | -1.14218800 | C             | 0.25923100  | 0.56949500  | 2.90703200  |
| H | 0.29836400  | -2.23771400 | -3.23159400 | H             | 0.46991200  | 0.14086200  | 3.89563400  |
| C | 0.92108500  | -0.60264700 | -2.00503500 | H             | 0.83561200  | 1.50613500  | 2.82049000  |
| C | 2.27162200  | -0.72949300 | -1.89608400 | H             | -0.80541000 | 0.84355100  | 2.87432000  |
| H | 2.88992500  | -1.28887300 | -2.58316800 | C             | 1.14008900  | -3.13836500 | 0.79478900  |
| C | 2.77187300  | 0.18307100  | -0.81505900 | H             | 0.08500600  | -2.96464700 | 1.03550500  |
| H | 3.55345300  | 0.89734200  | -1.13073300 | H             | 1.28381500  | -2.94338000 | -0.27805800 |
| C | 3.88967600  | 0.27225500  | 1.42508300  | H             | 1.37561200  | -4.18828000 | 0.99292600  |
| H | 4.61061400  | 1.01243400  | 1.06733300  |               |             |             |             |
| H | 2.99765200  | 0.76611500  | 1.81090200  |               |             |             |             |
| H | 4.33589600  | -0.33624000 | 2.21285100  | <b>TS20-2</b> |             |             |             |
| C | 4.64722600  | -1.36892200 | -0.21176700 |               |             |             |             |
| H | 4.29173400  | -2.07655500 | -0.95959600 | C             | -1.85879400 | -0.36560200 | -1.41002000 |
| H | 5.11392200  | -1.91257400 | 0.61046300  | C             | -1.33167600 | -1.76868000 | -1.78562400 |
| H | 5.36744100  | -0.67942200 | -0.66062600 | C             | -0.05530700 | -1.70454900 | -2.63760500 |
| N | 3.49323900  | -0.60960300 | 0.30648000  | H             | -2.12458400 | -2.31325100 | -2.30520900 |
| H | -2.43621900 | 0.33349900  | -2.36324600 | H             | -1.10745200 | -2.31951300 | -0.86548900 |
| C | -2.99913300 | -0.42191500 | -0.44518600 | H             | 0.28733000  | -2.70267900 | -2.91824400 |
| C | -4.35567500 | -0.40705100 | -0.76180200 | C             | 0.98784300  | -1.00470200 | -1.82513500 |
| C | -2.60163900 | -0.73942200 | 0.85944700  | C             | 2.31715200  | -1.22724300 | -1.62960000 |
| C | -5.31237700 | -0.70312100 | 0.20828400  | H             | 2.91707500  | -1.91191700 | -2.21163100 |
| H | -4.66705800 | -0.15737900 | -1.77327700 | C             | 2.84634000  | -0.24897500 | -0.63101900 |
| C | -3.55736200 | -1.03655100 | 1.82426700  | H             | 3.72876800  | 0.32789400  | -0.95717600 |
| H | -1.54142000 | -0.73108100 | 1.11877900  | C             | 4.08108200  | 0.02136600  | 1.52322100  |
| C | -4.91466400 | -1.01928300 | 1.50258700  | H             | 4.97418200  | 0.39205500  | 1.01193000  |
| H | -6.36665600 | -0.68111800 | -0.04892000 | H             | 3.39732300  | 0.85025000  | 1.71860800  |
| H | -3.24077700 | -1.27615600 | 2.83484300  | H             | 4.36233900  | -0.44435300 | 2.46935900  |
| H | -5.65767100 | -1.24599300 | 2.26050800  | C             | 4.23840000  | -2.12452200 | 0.36963700  |
| C | 1.50499400  | 0.82862700  | -0.25701500 | H             | 3.64236300  | -2.86233400 | -0.16504700 |
| C | 1.37030100  | 2.28526700  | -0.14168700 | H             | 4.61017100  | -2.55347200 | 1.30154900  |
| C | 0.12680900  | 2.82577400  | -0.17639700 | H             | 5.08353600  | -1.81140300 | -0.25168600 |
| C | -1.04645300 | 1.98479200  | -0.45831900 | N             | 3.39062400  | -0.96195700 | 0.66915100  |
| C | -0.85923300 | 0.76228800  | -0.99719900 | H             | -2.34571600 | 0.06703500  | -2.29306100 |
| N | 0.43887400  | 0.30466400  | -1.12173800 | C             | -2.88552300 | -0.47472300 | -0.29680200 |
| H | 1.09992300  | 0.27619600  | 0.92406500  | C             | -4.24103400 | -0.27568500 | -0.54474200 |
| H | 2.24111400  | 2.90700300  | 0.05460400  | C             | -2.46818400 | -0.81841100 | 0.99545700  |
| H | -2.04556900 | 2.36488400  | -0.28578800 | C             | -5.17667000 | -0.41582800 | 0.48033300  |
| C | -0.05388000 | 4.23122900  | 0.04045900  | H             | -4.56817000 | -0.00544100 | -1.54563500 |
| N | -0.20746600 | 5.36600800  | 0.22029500  | C             | -3.40113000 | -0.96134900 | 2.01436500  |
| H | -0.33048200 | -0.66285700 | -3.73177100 | H             | -1.40564100 | -0.96162400 | 1.19655600  |

|   |             |             |             |   |             |             |             |
|---|-------------|-------------|-------------|---|-------------|-------------|-------------|
| C | -4.75860100 | -0.75988100 | 1.76026000  | H | 5.51628600  | -0.58882200 | -0.45350100 |
| H | -6.22997500 | -0.25253700 | 0.27550500  | N | 3.63969200  | -0.64356300 | 0.51091900  |
| H | -3.06963000 | -1.22667000 | 3.01354200  | H | -2.30509100 | -0.01043400 | -2.23376000 |
| H | -5.48429600 | -0.86747800 | 2.56000300  | C | -3.01347300 | -0.48023900 | -0.27561400 |
| C | 1.61905100  | 0.56671900  | -0.22949000 | C | -4.34521400 | -0.41030000 | -0.67956800 |
| C | 1.56781300  | 2.02377700  | -0.20382000 | C | -2.71628800 | -0.68638000 | 1.07709300  |
| C | 0.35758000  | 2.63016900  | -0.32170100 | C | -5.37601300 | -0.54329000 | 0.24946100  |
| C | -0.85311700 | 1.83085900  | -0.56233100 | H | -4.57815100 | -0.24649000 | -1.72892200 |
| C | -0.72438500 | 0.56022200  | -0.99803200 | C | -3.74612400 | -0.82240700 | 2.00087100  |
| N | 0.55430200  | 0.04353500  | -1.08842400 | H | -1.67507000 | -0.71999700 | 1.40017700  |
| H | 1.23407600  | -0.06902100 | 0.94395400  | C | -5.07765700 | -0.75139300 | 1.59134300  |
| H | 2.46467400  | 2.61009600  | -0.01593200 | H | -6.40916900 | -0.47991400 | -0.07716000 |
| H | -1.83350100 | 2.26901400  | -0.42162800 | H | -3.50953400 | -0.97936300 | 3.04868200  |
| C | 0.25045200  | 4.05398500  | -0.20745600 | H | -5.87753600 | -0.85256700 | 2.31793200  |
| N | 0.15652500  | 5.20564000  | -0.11140100 | C | 1.57608300  | 0.65670500  | -0.13566000 |
| H | -0.24537800 | -1.14302400 | -3.56099400 | C | 1.44824400  | 2.11797100  | -0.12065600 |
| H | 2.46641600  | -1.22644700 | 1.22031200  | C | 0.20495000  | 2.65649700  | -0.17330900 |
| O | 1.10085300  | -0.97840300 | 1.74924300  | C | -0.97165300 | 1.80021600  | -0.38161400 |
| C | 0.97569400  | -0.41559600 | 3.02927400  | C | -0.79136900 | 0.54352900  | -0.84197100 |
| H | 1.63958300  | -0.90605300 | 3.75540600  | N | 0.50276500  | 0.08065100  | -0.95949400 |
| H | 1.21955600  | 0.66082000  | 3.02683200  | H | 1.17581200  | 0.15283300  | 1.07977100  |
| H | -0.05192600 | -0.51135900 | 3.40395000  | H | 2.32216500  | 2.75141500  | 0.01476300  |

**TS21**

|   |             |             |             |
|---|-------------|-------------|-------------|
| C | -1.89183400 | -0.40177100 | -1.29446600 |
| C | -1.32791900 | -1.80932300 | -1.57902900 |
| C | -0.06384400 | -1.74745400 | -2.44714200 |
| H | -2.10545300 | -2.40958700 | -2.05900100 |
| H | -1.08491100 | -2.29025700 | -0.62430000 |
| H | 0.31971800  | -2.74511000 | -2.67249700 |
| C | 0.96466400  | -0.95580300 | -1.70115700 |
| C | 2.31215500  | -1.09024000 | -1.57757400 |
| H | 2.91448700  | -1.75045800 | -2.18526100 |
| C | 2.83865600  | -0.02600300 | -0.65666900 |
| H | 3.57971300  | 0.65964400  | -1.11044100 |
| C | 3.95588100  | 0.35534500  | 1.55335200  |
| H | 4.52734000  | 1.17706300  | 1.11218800  |
| H | 3.01924600  | 0.72237500  | 1.97107000  |
| H | 4.53959600  | -0.12660300 | 2.33878800  |
| C | 4.85994100  | -1.31762100 | 0.02985800  |
| H | 4.57756000  | -2.09152100 | -0.68276900 |
| H | 5.37189800  | -1.77571500 | 0.87703500  |

**TS21-2**

|   |             |             |             |
|---|-------------|-------------|-------------|
| C | -1.78029500 | -0.48182000 | -1.24177700 |
| C | -1.24850000 | -1.91258900 | -1.47494700 |
| C | 0.04264700  | -1.91800600 | -2.30546300 |
| H | -2.03101800 | -2.50261300 | -1.95959700 |
| H | -1.04231200 | -2.37656600 | -0.50394400 |
| H | 0.39455200  | -2.93518600 | -2.49022700 |
| C | 1.07109600  | -1.14440300 | -1.54204900 |
| C | 2.40224900  | -1.33432700 | -1.33285400 |

|              |             |             |             |   |             |             |             |
|--------------|-------------|-------------|-------------|---|-------------|-------------|-------------|
| H            | 3.00927000  | -2.05405300 | -1.86301300 | C | 1.49837800  | -1.67775300 | -1.81512100 |
| C            | 2.92081000  | -0.27912900 | -0.40859300 | C | 1.29542700  | -0.26404600 | -1.32455300 |
| H            | 3.78831800  | 0.29038300  | -0.78624300 | H | 0.61996300  | -2.31431700 | -1.78556900 |
| C            | 4.15310000  | 0.16641900  | 1.71001200  | H | 2.16114400  | -1.80773800 | -2.66358500 |
| H            | 5.02543600  | 0.54064000  | 1.16606200  | H | 1.85265600  | 0.51001300  | -1.84417100 |
| H            | 3.44241800  | 0.98031400  | 1.86710500  | C | -0.07740800 | 0.16682100  | -0.98077300 |
| H            | 4.46661400  | -0.23245400 | 2.67646500  | C | -0.96802100 | 0.69269000  | -1.86523700 |
| C            | 4.36890200  | -2.04129700 | 0.69612900  | H | -0.81152300 | 0.75968500  | -2.92846100 |
| H            | 3.79148500  | -2.83252300 | 0.22049200  | C | -2.15441400 | 1.11137600  | -1.10895700 |
| H            | 4.76321200  | -2.39524300 | 1.65019700  | O | -0.73266500 | -0.97190200 | 0.05007600  |
| H            | 5.19902200  | -1.74748400 | 0.04512200  | C | -2.14394000 | -3.64703300 | -1.06782700 |
| N            | 3.48786800  | -0.88883800 | 0.92702300  | C | -3.05234800 | -3.48636600 | 0.15463800  |
| H            | -2.21055200 | -0.12026800 | -2.18462200 | B | -2.06114300 | -1.48538300 | -0.37039300 |
| C            | -2.87289900 | -0.49388300 | -0.18879400 | O | -1.95845200 | -2.32089700 | -1.52551700 |
| C            | -4.20993200 | -0.32176800 | -0.53826200 | O | -2.70263000 | -2.21732900 | 0.67645600  |
| C            | -2.54043100 | -0.72521000 | 1.15161900  | H | -2.58402600 | -4.26082400 | -1.85979000 |
| C            | -5.20952900 | -0.37878200 | 0.43260700  | H | -1.17925900 | -4.08769500 | -0.77632100 |
| H            | -4.47175600 | -0.13838000 | -1.57731000 | H | -2.89687000 | -4.26058700 | 0.91202400  |
| C            | -3.53678800 | -0.78564800 | 2.11745800  | H | -4.11364000 | -3.49916400 | -0.13877000 |
| H            | -1.49351800 | -0.84487700 | 1.43025500  | H | 1.61195700  | -1.62435200 | 0.37911500  |
| C            | -4.87478500 | -0.61228300 | 1.76116200  | C | 3.57768100  | -1.04938400 | -0.39177800 |
| H            | -6.24727900 | -0.23731800 | 0.14778400  | C | 4.16222400  | 0.21687700  | -0.34145600 |
| H            | -3.27092600 | -0.96387600 | 3.15467600  | C | 4.40647300  | -2.17245500 | -0.30404300 |
| H            | -5.65024100 | -0.65527800 | 2.51918500  | C | 5.54147900  | 0.36013900  | -0.20461600 |
| C            | 1.68071500  | 0.54296700  | -0.05901200 | H | 3.53022400  | 1.09899100  | -0.40880900 |
| C            | 1.61567300  | 1.99659200  | -0.13723400 | C | 5.78225900  | -2.03378400 | -0.16561700 |
| C            | 0.40105600  | 2.58412200  | -0.29724000 | H | 3.95794600  | -3.16134300 | -0.35027600 |
| C            | -0.80115500 | 1.76093900  | -0.49530100 | C | 6.35526300  | -0.76409000 | -0.11560700 |
| C            | -0.65773100 | 0.46538400  | -0.84684900 | H | 5.97889300  | 1.35307600  | -0.16709600 |
| N            | 0.62200300  | -0.05197300 | -0.88040400 | H | 6.41060700  | -2.91681600 | -0.10191500 |
| H            | 1.31191600  | -0.02368500 | 1.17433500  | H | 7.42981100  | -0.65349000 | -0.01027800 |
| H            | 2.50713300  | 2.60254600  | 0.01047000  | C | 0.18327200  | -0.75008600 | 3.43156500  |
| H            | -1.78632700 | 2.20146300  | -0.40514300 | C | -1.34273800 | -0.84437700 | 3.33730100  |
| C            | 0.28253000  | 4.01143700  | -0.27932200 | B | -0.52017000 | -0.19014300 | 1.32404300  |
| N            | 0.17931900  | 5.16621700  | -0.25974000 | O | 0.59829300  | -0.64246100 | 2.07930100  |
| H            | -0.13399800 | -1.44314300 | -3.27888900 | O | -1.63912800 | -0.05613200 | 2.19602600  |
| H            | 2.55612800  | -1.14470500 | 1.50601200  | C | 0.88657300  | 1.91187200  | 0.75627600  |
| O            | 1.21376300  | -0.94457100 | 1.97307900  | C | 0.97653400  | 3.21342100  | 0.47486900  |
| H            | 1.10759700  | -0.58126100 | 2.86028000  | C | -0.20074700 | 3.91953000  | -0.04516900 |
|              |             |             |             | C | -1.37893500 | 3.29145900  | -0.16235100 |
|              |             |             |             | C | -1.54870700 | 1.83732500  | 0.15391900  |
| <b>TS-AF</b> |             |             |             | N | -0.26398300 | 1.14025600  | 0.45994000  |
|              |             |             |             | H | 1.69287900  | 1.32754200  | 1.18745800  |
| C            | 2.09813700  | -1.24109400 | -0.51200800 | H | 1.88418600  | 3.76583100  | 0.68148700  |

|   |             |             |             |   |             |             |             |
|---|-------------|-------------|-------------|---|-------------|-------------|-------------|
| H | -2.26406700 | 3.83285100  | -0.48264400 | C | -4.02054500 | -0.24028700 | -0.49058700 |
| H | -2.19937100 | 1.74647900  | 1.02985500  | C | -4.37043900 | 2.13670500  | -0.38489600 |
| C | -0.09064500 | 5.31811600  | -0.36512100 | C | -5.39489300 | -0.44599000 | -0.38692200 |
| N | 0.01261400  | 6.44242200  | -0.61878100 | H | -3.34481800 | -1.08817400 | -0.56380600 |
| H | 0.64296200  | -1.62820000 | 3.89388800  | C | -5.74138900 | 1.93391000  | -0.27844000 |
| H | 0.48690800  | 0.14461500  | 3.99238700  | H | -3.96483400 | 3.14501300  | -0.39027300 |
| H | -1.85738600 | -0.43976800 | 4.21322000  | C | -6.25807600 | 0.63944700  | -0.27928600 |
| H | -1.67240000 | -1.87629700 | 3.16152800  | H | -5.78915800 | -1.45738100 | -0.39023000 |
| N | -3.01827600 | -0.12152200 | -0.76661200 | H | -6.40927400 | 2.78598600  | -0.19893300 |
| C | -4.02642200 | 0.15744200  | 0.29054100  | H | -7.32847200 | 0.47951300  | -0.19849800 |
| C | -3.76541000 | -0.44158300 | -2.01269400 | C | 0.42140000  | 1.26239400  | 3.54018300  |
| H | -4.75210000 | -0.65572400 | 0.29489100  | C | 1.92131600  | 1.23062800  | 3.22418300  |
| H | -3.54501100 | 0.18910600  | 1.26478200  | B | 0.73580500  | 0.55060700  | 1.39711900  |
| H | -4.53367200 | 1.10137600  | 0.05959400  | O | -0.19292200 | 1.19776600  | 2.26426400  |
| H | -4.46588900 | 0.37235000  | -2.22749300 | O | 1.99832300  | 0.44023700  | 2.04860000  |
| H | -4.31099200 | -1.37390100 | -1.86842700 | C | -1.01220900 | -1.28491300 | 1.18096300  |
| H | -3.05593400 | -0.57326200 | -2.82673700 | C | -1.42930500 | -2.54320700 | 0.97732200  |
| H | -2.83104200 | 1.80077900  | -1.62777700 | C | -0.49843700 | -3.50096300 | 0.38057900  |

**TS-AG**

|   |             |             |             |   |             |             |             |
|---|-------------|-------------|-------------|---|-------------|-------------|-------------|
| C | -2.02211600 | 1.31248400  | -0.57216200 | C | 0.78586000  | -3.16784300 | 0.17648100  |
| C | -1.43322100 | 1.89202900  | -1.82097400 | C | 1.31236300  | -1.80851600 | 0.52610000  |
| C | -1.15913700 | 0.44887800  | -1.46063900 | N | 0.24883800  | -0.82310700 | 0.78878200  |
| H | -0.60486900 | 2.58507700  | -1.73969200 | H | -1.64670200 | -0.52453600 | 1.62372700  |
| H | -2.09940400 | 2.05096900  | -2.66200500 | H | -2.42481700 | -2.85398500 | 1.26605500  |
| H | -1.68757800 | -0.30334100 | -2.04058600 | H | 1.48236700  | -3.86993700 | -0.26836600 |
| C | 0.17012800  | -0.00974400 | -1.06257200 | H | 1.96204800  | -1.85842600 | 1.41021800  |
| C | 1.14276900  | -0.71248900 | -1.62037700 | C | -0.97295300 | -4.81410200 | 0.03027700  |
| H | 1.02216000  | -1.11087000 | -2.62018100 | N | -1.37419900 | -5.86432400 | -0.24482200 |
| C | 2.17412100  | -1.21698100 | -0.65829700 | H | 0.10843400  | 2.17263000  | 4.05966000  |
| O | 0.79139200  | 1.28463300  | 0.04817900  | H | 0.13028500  | 0.39218600  | 4.14578400  |
| C | 2.78505600  | 3.68208500  | -1.66525900 | H | 2.51711000  | 0.77397600  | 4.02018600  |
| C | 3.33090000  | 3.77289000  | -0.22301100 | H | 2.30290200  | 2.23850500  | 3.01795200  |
| B | 1.69183500  | 2.24013600  | -0.33099000 | N | 3.09724200  | -2.18958700 | -1.22746000 |
| O | 1.90264200  | 2.56015100  | -1.64686600 | C | 3.85790300  | -1.58617300 | -2.31481200 |
| O | 2.43215200  | 2.98026100  | 0.55161700  | C | 4.02525300  | -2.67334000 | -0.21149300 |
| H | 3.56969500  | 3.51648100  | -2.40655700 | H | 4.53751200  | -2.33157700 | -2.73536800 |
| H | 2.21766600  | 4.57510500  | -1.94626300 | H | 3.19005900  | -1.24356600 | -3.10632800 |
| H | 3.34254200  | 4.79479900  | 0.16211600  | H | 4.45588900  | -0.72091300 | -1.97408600 |
| H | 4.33747300  | 3.35109300  | -0.13752400 | H | 4.56764700  | -1.84928800 | 0.28605600  |
| H | -1.55799800 | 1.63597300  | 0.35777600  | H | 4.75630000  | -3.33561200 | -0.68122700 |
| C | -3.49463700 | 1.05204900  | -0.48989400 | H | 3.50176800  | -3.24866600 | 0.55621300  |

**TS-AH**

|   |             |             |             |              |             |             |             |
|---|-------------|-------------|-------------|--------------|-------------|-------------|-------------|
| C | 0.86016900  | -1.03026700 | -1.25365300 | N            | 2.32975000  | 3.12402400  | -0.36834200 |
| C | 1.68905600  | -0.58898200 | -0.30447500 | C            | 2.00278600  | 3.51582100  | 0.98570000  |
| C | -1.46362800 | 1.29901700  | 0.02052600  | H            | 2.74416000  | 3.15577300  | 1.71696400  |
| C | -1.53379600 | -0.05064300 | -1.54950200 | H            | 1.95350500  | 4.60549000  | 1.04190900  |
| C | -0.10062100 | -0.18480000 | -2.04310700 | H            | 1.02653900  | 3.10530700  | 1.25994800  |
| H | -1.69430200 | -0.53436500 | 2.72388900  | C            | 3.38992900  | 3.89145300  | -0.99405000 |
| H | 0.86447700  | -2.09984300 | -1.44731300 | H            | 3.13078500  | 4.95348200  | -0.98091200 |
| C | -2.02215600 | 0.10575000  | 1.90668800  | H            | 4.36013800  | 3.76262000  | -0.49050500 |
| C | -2.78298600 | 1.84657900  | -0.05508600 | H            | 3.50006100  | 3.57691400  | -2.03470800 |
| H | 0.29845300  | 0.82516100  | -2.17154400 | H            | -0.65235600 | 1.84101300  | -0.46579500 |
| C | -3.74669700 | 1.35017200  | 0.79833500  |              |             |             |             |
| C | -3.38220800 | 0.41641400  | 1.78722200  |              |             |             |             |
| H | -3.03307200 | 2.57665500  | -0.81742400 | <b>TS-AI</b> |             |             |             |
| H | -4.11866600 | -0.00256700 | 2.46078700  |              |             |             |             |
| N | -1.07220200 | 0.56130800  | 1.10913200  | C            | 0.56991800  | -0.24229700 | 0.00536800  |
| C | -5.11475300 | 1.78772000  | 0.67963800  | C            | -0.26578600 | 0.45468400  | -1.08903800 |
| N | -6.21442900 | 2.13271100  | 0.57822900  | C            | -1.53027500 | 1.13680700  | -0.57516500 |
| C | -2.34929400 | -1.15604500 | -1.05046500 | H            | -0.51874500 | -0.24998000 | -1.88621800 |
| C | -3.72584500 | -1.16131400 | -1.34753500 | H            | 0.34844200  | 1.23433700  | -1.54433300 |
| C | -1.85412800 | -2.16315200 | -0.19973100 | H            | -1.82463200 | 2.02238000  | -1.14254400 |
| C | -4.57253200 | -2.13106100 | -0.82892600 | C            | -2.68515700 | 0.37166800  | -0.21157600 |
| H | -4.12820000 | -0.38294600 | -1.99173000 | C            | -3.94804900 | 0.97702500  | -0.05058700 |
| C | -2.70352300 | -3.13728700 | 0.31089500  | H            | -4.03001600 | 2.02519400  | -0.30536900 |
| H | -0.80961600 | -2.15477200 | 0.08878100  | C            | -5.01501200 | 0.26211700  | 0.44920700  |
| C | -4.06277700 | -3.12493200 | 0.00453100  | H            | -4.86617800 | -0.78357200 | 0.70544800  |
| H | -5.63003900 | -2.11002100 | -1.07203300 | C            | -7.30185300 | -0.09135900 | 1.20334200  |
| H | -2.30221500 | -3.90347100 | 0.96689600  | H            | -7.65514600 | 0.32081600  | 2.15312000  |
| H | -4.72221400 | -3.88376300 | 0.41349000  | H            | -8.14177300 | -0.14054100 | 0.50412700  |
| H | -2.09960000 | 0.59469700  | -2.22581400 | H            | -6.92521800 | -1.09967700 | 1.37495100  |
| H | -0.17069100 | -0.60416300 | -3.05750600 | C            | -6.54442500 | 2.12960700  | 0.36336300  |
| O | 2.39957800  | -1.53523300 | 0.42478000  | H            | -5.92235600 | 2.79348100  | 0.97173900  |
| C | 5.85560700  | -2.15140700 | 0.90205000  | H            | -7.59329200 | 2.31893600  | 0.58863600  |
| C | 5.88050700  | -0.93145300 | -0.04329400 | H            | -6.36309400 | 2.34411600  | -0.69425800 |
| H | 6.48220300  | -2.01498000 | 1.78681300  | N            | -6.23838800 | 0.73696300  | 0.65694900  |
| H | 6.16609200  | -3.06925700 | 0.39037700  | O            | -2.59466700 | -0.89877300 | 0.18281100  |
| H | 6.20916800  | -0.02205400 | 0.47256400  | C            | -1.00469100 | -3.43499800 | -1.79399400 |
| H | 6.51428900  | -1.08626900 | -0.91989700 | C            | -1.11088000 | -4.07234400 | -0.39142100 |
| B | 3.75711800  | -1.50960900 | 0.41972800  | B            | -1.91921100 | -1.98828700 | -0.35350500 |
| O | 4.52548600  | -0.77057900 | -0.45056000 | O            | -1.75177800 | -2.20940100 | -1.68360700 |
| O | 4.49229700  | -2.27251000 | 1.29225800  | O            | -1.52689600 | -2.99862700 | 0.46421600  |
| C | 1.86545900  | 0.79430300  | 0.15980500  | H            | -1.45239300 | -4.05035600 | -2.57672200 |
| H | 1.60186500  | 0.97680500  | 1.19671400  | H            | 0.02982700  | -3.19340200 | -2.05468300 |
| C | 2.28556800  | 1.77352500  | -0.65813500 | H            | -0.15369300 | -4.46106400 | -0.04259400 |
| H | 2.59809200  | 1.52641300  | -1.67212500 | H            | -1.86883100 | -4.86101400 | -0.34658600 |

|              |             |             |             |   |             |             |             |
|--------------|-------------|-------------|-------------|---|-------------|-------------|-------------|
| H            | -0.10117400 | -0.69387200 | 0.75341400  | H | 2.30699000  | 0.64560000  | -2.28636600 |
| C            | 1.41179100  | -1.36028700 | -0.57019500 | H | 0.33503300  | 1.69807800  | -2.76694200 |
| C            | 1.71379700  | -2.48582800 | 0.20588100  | C | -0.90022100 | 0.93253200  | -1.44807100 |
| C            | 1.96634800  | -1.27423900 | -1.85398600 | C | -2.05358600 | 1.55183900  | -1.03728800 |
| C            | 2.52800500  | -3.50075100 | -0.28930000 | H | -1.96542900 | 2.25623100  | -0.21603000 |
| H            | 1.30174000  | -2.56006100 | 1.20991900  | C | -3.28862800 | 1.06024600  | -1.43339000 |
| C            | 2.78039100  | -2.28741800 | -2.35146500 | H | -3.34874600 | 0.40181800  | -2.29647700 |
| H            | 1.76524400  | -0.40060100 | -2.46721800 | C | -5.70982300 | 0.88640600  | -1.33305100 |
| C            | 3.05957300  | -3.40971200 | -1.57425600 | H | -6.34147600 | 1.75716900  | -1.53428800 |
| H            | 2.75335100  | -4.36225200 | 0.33291900  | H | -5.55615500 | 0.34078300  | -2.26493700 |
| H            | 3.20119100  | -2.19861800 | -3.34861400 | H | -6.22149500 | 0.23837400  | -0.61530800 |
| H            | 3.69571400  | -4.19954900 | -1.96081000 | C | -4.41149800 | 1.99565200  | 0.48896900  |
| C            | 1.12939200  | 4.39876700  | -1.49728400 | H | -3.62256600 | 1.56277500  | 1.11495800  |
| C            | 2.64509800  | 4.57820000  | -1.70659200 | H | -5.38061200 | 1.85288000  | 0.96781300  |
| B            | 2.24686400  | 2.64477500  | -0.61286500 | H | -4.23722900 | 3.06817300  | 0.35584700  |
| O            | 1.01989800  | 3.29904000  | -0.60702600 | N | -4.42487700 | 1.30430500  | -0.79879600 |
| O            | 3.20092400  | 3.31817800  | -1.36427000 | O | -0.87897400 | -0.70114100 | -0.19980400 |
| C            | 3.80098300  | 0.88858300  | 0.06998700  | C | -3.55495900 | -2.60888800 | -1.52131400 |
| C            | 4.23514200  | 0.23265100  | 1.15217800  | C | -3.34529400 | -3.27471800 | -0.14905100 |
| C            | 3.30372400  | -0.02103000 | 2.25620800  | B | -1.86799400 | -1.58856300 | -0.40938300 |
| C            | 1.96758300  | 0.13962600  | 2.02047500  | O | -2.43168000 | -1.75093400 | -1.67183100 |
| C            | 1.44582900  | 0.75028600  | 0.82444800  | O | -2.46598100 | -2.39419100 | 0.53557900  |
| N            | 2.48915500  | 1.42152700  | 0.03103300  | H | -4.47432200 | -2.00596800 | -1.53764900 |
| H            | 4.42250000  | 1.06308900  | -0.80291700 | H | -3.59386200 | -3.32451600 | -2.34589300 |
| H            | 5.23828800  | -0.17413700 | 1.19216200  | H | -2.87205100 | -4.25816100 | -0.24597800 |
| H            | 1.25107600  | -0.25250700 | 2.74540800  | H | -4.27440800 | -3.38729200 | 0.41540100  |
| H            | 0.33989000  | 1.76692600  | 1.39742300  | H | 1.17230500  | -1.30303000 | -0.24156900 |
| C            | 3.76904700  | -0.56188300 | 3.49224800  | C | 3.23564000  | -1.22752100 | -0.55140700 |
| N            | 4.14406300  | -1.01523900 | 4.49387900  | C | 3.48231600  | -2.15084800 | 0.47423300  |
| H            | 0.62068800  | 4.15654600  | -2.44038900 | C | 4.24321100  | -0.99847700 | -1.48976200 |
| H            | 0.65304000  | 5.28101300  | -1.06111100 | C | 4.69664300  | -2.81812000 | 0.56231500  |
| H            | 3.05283100  | 5.34946800  | -1.04202800 | H | 2.69476500  | -2.33597400 | 1.20271000  |
| H            | 2.90421800  | 4.83398400  | -2.73789900 | C | 5.46317900  | -1.67034100 | -1.40543400 |
| O            | -0.59660000 | 2.23950300  | 1.69976000  | H | 4.09322100  | -0.29736300 | -2.30489900 |
| H            | -1.25009600 | 1.63554400  | 0.50629600  | C | 5.69534200  | -2.57966000 | -0.38106700 |
| H            | -0.84348800 | 1.78357100  | 2.51540400  | H | 4.86378400  | -3.53066700 | 1.36409100  |
|              |             |             |             | H | 6.23211600  | -1.47850200 | -2.14740600 |
|              |             |             |             | H | 6.64494900  | -3.10132300 | -0.31737200 |
| <b>TS-AJ</b> |             |             |             | C | -0.50708800 | -1.29315200 | 3.23741800  |
|              |             |             |             | C | -1.87543300 | -0.62190900 | 3.04723100  |
| C            | 1.88345000  | -0.53328900 | -0.53308800 | B | -0.50735400 | -0.23477400 | 1.21901700  |
| C            | 1.49134200  | 0.02072200  | -1.91064900 | O | 0.02956100  | -1.36637500 | 1.93656900  |
| C            | 0.26480400  | 0.89336500  | -2.03065100 | O | -1.70133100 | 0.21697200  | 1.91791000  |
| H            | 1.39531900  | -0.81072900 | -2.62020200 | C | 0.19282500  | 2.18754400  | 1.32662300  |



|   |             |             |             |
|---|-------------|-------------|-------------|
| C | 0.97211400  | 3.26787700  | 1.06804800  |
| C | 2.23621500  | 3.00768400  | 0.40446000  |
| C | 2.66654500  | 1.75142500  | 0.17486400  |
| C | 1.87277400  | 0.54300400  | 0.60374400  |
| N | 0.50788600  | 0.90443100  | 1.02322700  |
| H | -0.78305000 | 2.29640200  | 1.79260000  |
| H | 0.67067300  | 4.27101300  | 1.32970500  |
| H | 3.61733600  | 1.57241100  | -0.31953700 |
| H | 2.37503300  | 0.04954400  | 1.45417200  |
| C | 3.04024000  | 4.12008700  | -0.03877500 |
| N | 3.66956500  | 5.02418900  | -0.39556000 |
| H | -0.58408600 | -2.29528400 | 3.67187600  |
| H | 0.13404300  | -0.67797000 | 3.88793300  |
| H | -2.17652100 | -0.02921800 | 3.91884900  |
| H | -2.64826900 | -1.37246200 | 2.83781400  |

**TS-AK**

|   |             |             |             |
|---|-------------|-------------|-------------|
| C | 1.44763700  | -1.23195900 | 0.00348700  |
| C | 1.04992600  | -1.74614000 | -1.38216100 |
| C | -0.40310000 | -2.11556000 | -1.36327100 |
| H | 1.67645800  | -2.59721300 | -1.66785800 |
| H | 1.22271000  | -0.95345000 | -2.12741000 |
| H | -0.77098100 | -2.94809000 | -1.95116200 |
| C | -1.27283700 | -1.40031100 | -0.63163700 |
| C | -2.74748000 | -1.49624100 | -0.70607200 |
| H | -3.20436900 | -1.32444900 | -1.67462600 |
| C | -3.28930600 | -1.01923600 | 0.42721400  |
| H | -2.89073200 | -1.23785200 | 1.40794000  |
| C | -4.97833900 | 0.33482500  | -0.75874700 |
| H | -5.83548700 | 0.98222300  | -0.57284600 |
| H | -4.13260800 | 0.90498400  | -1.14691800 |
| H | -5.25466500 | -0.47278900 | -1.43588600 |
| C | -5.62551000 | -0.94680100 | 1.26648500  |
| H | -5.95718500 | -1.78937600 | 0.65947500  |
| H | -6.44901300 | -0.25405600 | 1.44273800  |
| H | -5.22925400 | -1.30856100 | 2.21484300  |
| N | -4.54028700 | -0.24714900 | 0.53415000  |
| H | 1.21068500  | -2.03237000 | 0.71661900  |
| C | 2.91248400  | -0.88552600 | 0.17383600  |
| C | 3.43838400  | -0.76420700 | 1.46484600  |
| C | 3.76239800  | -0.65887300 | -0.91020700 |
| C | 4.76990900  | -0.42253800 | 1.66812000  |

|   |             |             |             |
|---|-------------|-------------|-------------|
| H | 2.78900900  | -0.94449700 | 2.31863500  |
| C | 5.09880900  | -0.31729600 | -0.71102800 |
| H | 3.38413300  | -0.75074300 | -1.92353300 |
| C | 5.60703600  | -0.19698000 | 0.57745800  |
| H | 5.15690600  | -0.33418900 | 2.67851900  |
| H | 5.74232200  | -0.14400400 | -1.56802300 |
| H | 6.64757700  | 0.06908900  | 0.73317900  |
| C | -1.76884500 | 0.68745900  | 0.61135600  |
| C | -1.24749900 | 1.95336300  | 0.68106700  |
| C | 0.01125200  | 2.26123200  | 0.00842400  |
| C | 0.89548900  | 1.27487400  | -0.26783500 |
| C | 0.56531500  | -0.03248600 | 0.38969800  |
| N | -0.86384700 | -0.29286700 | 0.15619200  |
| H | -4.13356000 | 0.54380600  | 1.07186300  |
| H | -1.85193400 | 2.78232500  | 1.03548300  |
| H | 1.77833600  | 1.41387000  | -0.88265400 |
| H | 0.66008200  | 0.11512900  | 1.48245200  |
| C | 0.22247300  | 3.59902100  | -0.48227200 |
| N | 0.36876300  | 4.68580100  | -0.85654300 |

**TS-AL**

|   |             |             |             |
|---|-------------|-------------|-------------|
| C | -1.60736100 | -0.78697400 | -0.85435100 |
| C | -1.14471000 | -2.23865800 | -0.62543000 |
| C | 0.13806800  | -2.52741100 | -1.41013800 |
| H | -1.94752900 | -2.91655300 | -0.92815900 |
| H | -0.96957000 | -2.39778000 | 0.44510900  |
| H | 0.48576700  | -3.55066500 | -1.24653100 |
| C | 1.19998300  | -1.55776100 | -0.98900500 |
| C | 2.56137200  | -1.67132700 | -0.97039400 |
| H | 3.11187700  | -2.50746200 | -1.37785500 |
| C | 3.17040100  | -0.42258700 | -0.44516000 |
| H | 3.99243800  | 0.00435900  | -1.03685300 |
| C | 4.81008500  | 0.43311000  | 1.27808700  |
| H | 5.70723200  | 0.18652100  | 0.70125200  |
| H | 4.45481800  | 1.42508200  | 0.98569700  |
| H | 5.05642000  | 0.44468300  | 2.34146400  |
| C | 4.06419500  | -1.88212700 | 1.51879300  |
| H | 3.22564100  | -2.54290600 | 1.29635500  |
| H | 4.22985700  | -1.83362500 | 2.59698200  |
| H | 4.96606000  | -2.27177100 | 1.03393000  |
| N | 3.74179400  | -0.54018000 | 1.02628000  |
| H | -1.84690800 | -0.69433600 | -1.92354900 |

|   |             |             |             |   |             |             |             |
|---|-------------|-------------|-------------|---|-------------|-------------|-------------|
| C | -2.87080800 | -0.49204700 | -0.07150200 | H | -6.06092000 | 0.78257900  | -0.51481300 |
| C | -4.11294700 | -0.50840000 | -0.70452800 | H | -5.14546200 | 1.50538200  | -1.85204600 |
| C | -2.82037400 | -0.26671000 | 1.30732600  | N | -4.37645800 | -0.29783700 | -1.09226000 |
| C | -5.28489500 | -0.30359100 | 0.02060800  | O | -1.76646800 | -0.65017800 | 0.63420700  |
| H | -4.16233900 | -0.67900300 | -1.77718400 | C | -1.38395200 | -4.15260900 | 0.48032100  |
| C | -3.98767200 | -0.06361900 | 2.03392000  | C | -0.01474000 | -3.71830900 | 1.03117700  |
| H | -1.85459100 | -0.22885700 | 1.80462100  | B | -1.32759200 | -1.89180200 | 0.74487500  |
| C | -5.22471200 | -0.08171400 | 1.39219700  | O | -2.00408800 | -2.93278400 | 0.09566200  |
| H | -6.24301400 | -0.31268800 | -0.48938600 | O | -0.19902700 | -2.35677800 | 1.40262200  |
| H | -3.93243400 | 0.11623400  | 3.10288500  | H | -1.99175500 | -4.64291700 | 1.24992500  |
| H | -6.13577200 | 0.08342200  | 1.95825400  | H | -1.30229800 | -4.82080600 | -0.38078600 |
| C | 1.95092600  | 0.43827300  | -0.09929100 | H | 0.76847200  | -3.77850800 | 0.26409300  |
| C | 1.79130500  | 1.84799600  | -0.31424400 | H | 0.30087100  | -4.30139000 | 1.89978600  |
| C | 0.54654100  | 2.39619200  | -0.40581300 | H | 0.73509700  | -1.31568200 | -0.80252000 |
| C | -0.63492600 | 1.52818800  | -0.43490200 | C | 2.83813100  | -1.14078800 | -0.51276300 |
| C | -0.48533400 | 0.19461800  | -0.56284600 | C | 2.94519500  | -1.90435400 | 0.65706800  |
| N | 0.79565800  | -0.34432300 | -0.53367100 | C | 3.98936500  | -0.93075600 | -1.27426800 |
| H | 2.62835200  | -0.01067300 | 1.22187700  | C | 4.16142900  | -2.45909600 | 1.03859600  |
| H | 2.66774500  | 2.49138400  | -0.31625200 | H | 2.06319800  | -2.04243100 | 1.27714400  |
| H | -1.62731000 | 1.96150700  | -0.42187800 | C | 5.20941300  | -1.48697900 | -0.89244900 |
| C | 0.38849200  | 3.81357000  | -0.49282500 | H | 3.95175100  | -0.31862700 | -2.16966900 |
| N | 0.25730400  | 4.96423700  | -0.56528700 | C | 5.30007700  | -2.25607700 | 0.26192100  |
| H | -0.05580800 | -2.41912900 | -2.48505500 | H | 4.22079500  | -3.04703200 | 1.94939700  |

**TS-AM**

|   |             |             |             |   |             |             |             |
|---|-------------|-------------|-------------|---|-------------|-------------|-------------|
| C | 1.49302100  | -0.52229400 | -0.85667300 | H | 6.09201600  | -1.30752900 | -1.49842000 |
| C | 1.43280100  | 0.08165200  | -2.25934800 | H | 6.25082300  | -2.68608900 | 0.56011800  |
| C | 0.02996800  | 0.29380200  | -2.75898100 | C | -1.19110800 | 2.08738900  | 2.77261000  |
| H | 1.93065100  | -0.58485300 | -2.96974000 | C | -2.53674700 | 2.36659900  | 2.08526400  |
| H | 1.98006600  | 1.03493600  | -2.28404600 | B | -1.35720000 | 0.70254700  | 0.97801400  |
| H | -0.14215200 | 0.16081300  | -3.82848300 | O | -0.84613700 | 0.80061300  | 2.32145900  |
| C | -1.05503800 | 0.59266000  | -2.09368600 | O | -2.47465500 | 1.63742900  | 0.87348000  |
| C | -2.39753800 | 0.77823200  | -1.96196900 | C | -0.20535800 | 2.52145200  | -0.39814300 |
| H | -2.80406500 | 1.78056700  | -1.88739100 | C | 0.87140400  | 3.32485000  | -0.43985600 |
| C | -3.14473300 | -0.33123600 | -1.54765900 | C | 2.14144000  | 2.79319800  | 0.04650900  |
| H | -2.67825600 | -1.31198600 | -1.57037300 | C | 2.24210400  | 1.50516900  | 0.41065200  |
| C | -4.97163000 | -1.48114700 | -0.48613500 | C | 1.10739500  | 0.52944500  | 0.22468200  |
| H | -5.92924200 | -1.70921000 | -0.96243300 | N | -0.20256700 | 1.16505000  | -0.07720000 |
| H | -4.28332000 | -2.32095400 | -0.58246400 | H | -1.19428200 | 2.90688800  | -0.62367500 |
| H | -5.13240900 | -1.29117300 | 0.57931700  | H | 0.78661100  | 4.36255400  | -0.73166400 |
| C | -5.05989200 | 0.97762500  | -0.89863800 | H | 3.15975600  | 1.11893200  | 0.84106000  |
| H | -4.48271700 | 1.57485100  | -0.18484500 | H | 0.98521900  | -0.01789800 | 1.16782300  |
|   |             |             |             | C | 3.26353000  | 3.68260300  | 0.20033800  |
|   |             |             |             | N | 4.15667600  | 4.41180600  | 0.30376400  |
|   |             |             |             | H | -1.25698700 | 2.10231900  | 3.86534500  |
|   |             |             |             | H | -0.43916900 | 2.82928600  | 2.45833600  |

|   |             |            |            |
|---|-------------|------------|------------|
| H | -2.69276400 | 3.43401500 | 1.88489400 |
| H | -3.37335000 | 2.00448000 | 2.70068700 |

**TS-AN**

|   |             |             |             |
|---|-------------|-------------|-------------|
| C | -1.71324200 | -1.26496900 | -0.02440200 |
| C | -1.31135900 | -1.80658800 | 1.34995900  |
| C | 0.12562400  | -2.23571300 | 1.29681800  |
| H | -1.96543000 | -2.63662700 | 1.63506500  |
| H | -1.44438100 | -1.01754500 | 2.10667400  |
| H | 0.46082800  | -3.11433500 | 1.83504600  |
| C | 1.01865700  | -1.53092600 | 0.58510800  |
| C | 2.48042500  | -1.68353400 | 0.60240600  |
| H | 2.96856700  | -1.58920500 | 1.57112500  |
| C | 3.04885900  | -1.08666400 | -0.47783500 |
| H | 2.73410300  | -1.25556200 | -1.50079400 |
| C | 5.43555600  | -1.60019800 | -0.12007900 |
| H | 6.41521600  | -1.13017100 | -0.01717700 |
| H | 5.16209800  | -2.12704600 | 0.79204100  |
| H | 5.43753700  | -2.30004100 | -0.95694600 |
| C | 4.75339300  | 0.26163300  | -1.58622800 |
| H | 4.88269200  | -0.40695600 | -2.43940900 |
| H | 5.67246500  | 0.81569800  | -1.39489900 |
| H | 3.91132900  | 0.93478300  | -1.75196000 |
| N | 4.42007500  | -0.54980000 | -0.38700200 |
| H | -1.50479500 | -2.06374100 | -0.74757500 |
| C | -3.17008700 | -0.87952900 | -0.17669600 |
| C | -3.70936700 | -0.74857100 | -1.46108600 |
| C | -3.99866200 | -0.62642800 | 0.91813300  |
| C | -5.03414200 | -0.37241400 | -1.64788600 |
| H | -3.07725300 | -0.95040200 | -2.32299500 |
| C | -5.32812100 | -0.25059000 | 0.73530300  |
| H | -3.60916500 | -0.72560300 | 1.92661600  |
| C | -5.85015700 | -0.12135900 | -0.54693700 |
| H | -5.43236000 | -0.27756700 | -2.65327600 |
| H | -5.95541800 | -0.05772300 | 1.60006500  |
| H | -6.88534500 | 0.17150400  | -0.68947500 |
| C | 1.53384200  | 0.57507100  | -0.56686400 |
| C | 1.06375900  | 1.86295100  | -0.67401800 |
| C | -0.20762800 | 2.20539100  | -0.03799400 |
| C | -1.11320800 | 1.23672000  | 0.23054900  |
| C | -0.80311400 | -0.08614100 | -0.40963600 |
| N | 0.61689600  | -0.36938200 | -0.14175300 |

|   |             |            |             |
|---|-------------|------------|-------------|
| H | 4.35944700  | 0.14067900 | 0.41299700  |
| H | 1.70232900  | 2.66804400 | -1.02604900 |
| H | -2.00446500 | 1.40075300 | 0.82640800  |
| H | -0.87837900 | 0.05193200 | -1.50509100 |
| C | -0.39954800 | 3.54998100 | 0.44092100  |
| N | -0.52773000 | 4.64021100 | 0.81118200  |
| O | 3.76448100  | 1.49887900 | 1.12951300  |
| H | 2.90398800  | 1.47456000 | 0.64678700  |
| H | 3.53698200  | 1.56761700 | 2.06252700  |

**TS-AO**

|   |             |             |             |
|---|-------------|-------------|-------------|
| C | 0.66998100  | -1.14765600 | 0.83764300  |
| C | 0.24270100  | -2.51913000 | 0.22416400  |
| C | -1.27198900 | -2.69687500 | 0.01852700  |
| H | 0.62742300  | -3.32121900 | 0.85914200  |
| H | 0.74747200  | -2.61376600 | -0.74489900 |
| H | -1.56578600 | -3.66542200 | -0.37959200 |
| C | -1.85687200 | -1.57294200 | -0.62306700 |
| C | -2.96539100 | -1.36557500 | -1.52674000 |
| H | -3.51678000 | -2.16643300 | -1.99918500 |
| C | -3.16554200 | -0.02306900 | -1.68246000 |
| H | -3.90522700 | 0.46837700  | -2.29793900 |
| H | 0.89280800  | -1.30706000 | 1.89835000  |
| C | 1.93111500  | -0.63007700 | 0.17082400  |
| C | 3.17365700  | -0.83344200 | 0.77041300  |
| C | 1.87800800  | 0.03705800  | -1.05775100 |
| C | 4.34219600  | -0.38321200 | 0.15928700  |
| H | 3.22570200  | -1.34575000 | 1.72807700  |
| C | 3.04192100  | 0.48936100  | -1.66842100 |
| H | 0.91398300  | 0.20664600  | -1.53334800 |
| C | 4.27942000  | 0.27945100  | -1.06157800 |
| H | 5.30071800  | -0.54537400 | 0.64225200  |
| H | 2.98371800  | 1.01066600  | -2.61872000 |
| H | 5.18743000  | 0.63612500  | -1.53677100 |
| C | -2.20032800 | 0.65853500  | -0.86962600 |
| C | -1.95679600 | 1.95807500  | -0.55851300 |
| C | -0.91860900 | 2.27126200  | 0.38588700  |
| C | -0.20655700 | 1.26640300  | 0.99840100  |
| C | -0.49521000 | -0.12202800 | 0.80504400  |
| N | -1.41228200 | -0.35043500 | -0.28276400 |
| H | -2.54619900 | 2.75101400  | -1.00422200 |
| H | 0.58842700  | 1.51961200  | 1.69447500  |

|   |             |             |            |   |             |             |            |
|---|-------------|-------------|------------|---|-------------|-------------|------------|
| H | -1.16964800 | -0.64005700 | 1.82011200 | O | -3.46630000 | -2.10391800 | 1.00478400 |
| C | -0.64197500 | 3.64484800  | 0.69233800 | H | -2.57766800 | -2.32854900 | 0.44350100 |
| N | -0.42585200 | 4.75746300  | 0.93083800 | H | -4.19143800 | -2.02256300 | 0.37341800 |
| O | -1.72985000 | -1.71542000 | 2.35015500 | O | -2.74699300 | -0.03757400 | 2.01133100 |
| H | -1.71129600 | -2.39091200 | 1.35373200 | H | -3.15682500 | -0.98111300 | 1.57103000 |
| H | -2.62539000 | -1.58819500 | 2.69454500 | H | -2.63723300 | -0.13327800 | 2.96600500 |

### TS-AP

|   |             |             |             |
|---|-------------|-------------|-------------|
| C | 0.40070000  | -0.83772100 | 1.31804500  |
| C | -0.31338900 | -2.20565500 | 1.19436700  |
| C | -1.05286400 | -2.41211100 | -0.13154100 |
| H | -1.00284000 | -2.30167900 | 2.04606000  |
| H | 0.43707800  | -2.99152400 | 1.33438600  |
| H | -0.99252600 | -3.39887700 | -0.58393200 |
| C | -1.12156700 | -1.32948700 | -1.02511700 |
| C | -1.50558600 | -1.21738900 | -2.41599800 |
| H | -1.74952200 | -2.06381600 | -3.04336300 |
| C | -1.49742800 | 0.10097900  | -2.78177800 |
| H | -1.73797100 | 0.51686900  | -3.74969500 |
| H | 0.52853200  | -0.60124800 | 2.38188900  |
| C | 1.78299800  | -0.80941800 | 0.68248600  |
| C | 2.74594300  | 0.06156200  | 1.20231300  |
| C | 2.11888400  | -1.58414800 | -0.43022800 |
| C | 4.00812400  | 0.16214700  | 0.63010400  |
| H | 2.50147800  | 0.66674800  | 2.07284400  |
| C | 3.38380300  | -1.48415300 | -1.00669200 |
| H | 1.39058300  | -2.27275900 | -0.84710700 |
| C | 4.33118800  | -0.61134900 | -0.48269800 |
| H | 4.74018100  | 0.84261900  | 1.05339800  |
| H | 3.62680900  | -2.09270800 | -1.87227100 |
| H | 5.31459800  | -0.53372900 | -0.93497500 |
| C | -1.10525900 | 0.87022500  | -1.64209700 |
| C | -0.91545200 | 2.19138300  | -1.38450100 |
| C | -0.47310500 | 2.59954200  | -0.08181900 |
| C | -0.19311200 | 1.64643400  | 0.88576900  |
| C | -0.47168500 | 0.27403700  | 0.71219200  |
| N | -0.88868200 | -0.06860500 | -0.61070700 |
| H | -1.07833100 | 2.93081000  | -2.15990100 |
| H | 0.21126400  | 1.96563000  | 1.84320000  |
| H | -1.71839400 | 0.19290900  | 1.51286200  |
| C | -0.28938500 | 3.98787100  | 0.20544100  |
| N | -0.13964200 | 5.11456200  | 0.43559800  |

### TS-AQ

|   |             |             |             |
|---|-------------|-------------|-------------|
| C | 1.91480900  | -0.80451600 | 1.00438000  |
| C | 1.47910200  | -2.23750000 | 0.62905300  |
| C | 0.24412900  | -2.67174600 | 1.42612700  |
| H | 2.31662400  | -2.91698000 | 0.81215200  |
| H | 1.26773100  | -2.27832700 | -0.44653900 |
| H | -0.08819300 | -3.67019200 | 1.12994600  |
| C | -0.86018800 | -1.68259700 | 1.20639000  |
| C | -2.21278500 | -1.85186300 | 1.11636000  |
| H | -2.72161900 | -2.76324400 | 1.39720400  |
| C | -2.90018700 | -0.52930000 | 0.87247500  |
| H | -3.58876200 | -0.23903500 | 1.69780400  |
| C | -4.52867600 | 0.72773500  | -0.43913400 |
| H | -5.11980400 | 0.92531100  | 0.47078400  |
| H | -3.81707800 | 1.54956400  | -0.56466200 |
| H | -5.20578700 | 0.72122600  | -1.29819700 |
| C | -4.76142800 | -1.64253400 | -0.26612400 |
| H | -4.22600800 | -2.59287900 | -0.30037400 |
| H | -5.45624900 | -1.60024600 | -1.10933100 |
| H | -5.34731200 | -1.59942700 | 0.66773300  |
| N | -3.80886800 | -0.54095400 | -0.35912500 |
| H | 2.18200800  | -0.83649700 | 2.07154100  |
| C | 3.16625100  | -0.42492000 | 0.23710700  |
| C | 4.41699200  | -0.72365200 | 0.78128700  |
| C | 3.11381000  | 0.12687900  | -1.04523500 |
| C | 5.58630200  | -0.48143100 | 0.06684800  |
| H | 4.47265300  | -1.15010900 | 1.78018100  |
| C | 4.28020100  | 0.37155300  | -1.76366500 |
| H | 2.14823200  | 0.39984700  | -1.46156700 |
| C | 5.52101900  | 0.06627100  | -1.21107100 |
| H | 6.54862400  | -0.71411200 | 0.51182500  |
| H | 4.21910200  | 0.80958700  | -2.75509900 |
| H | 6.43096700  | 0.26318200  | -1.76858200 |
| C | -1.70537200 | 0.40257600  | 0.72367300  |
| C | -1.56582500 | 1.77963500  | 0.92691900  |

|   |             |             |             |
|---|-------------|-------------|-------------|
| C | -0.31460300 | 2.37574900  | 0.94330200  |
| C | 0.86542100  | 1.51858500  | 0.81252700  |
| C | 0.76423200  | 0.17389900  | 0.87165900  |
| N | -0.51013600 | -0.39198700 | 1.01014900  |
| H | -1.51217800 | 0.29895200  | -0.96447600 |
| H | -2.45312300 | 2.40666200  | 0.98191300  |
| H | 1.84621100  | 1.97079700  | 0.71795500  |
| C | -0.18225800 | 3.78560800  | 1.00863700  |
| N | -0.07299600 | 4.94344400  | 1.05247000  |
| H | 0.49717100  | -2.71589000 | 2.49299200  |
| H | -2.67272000 | -0.43214800 | -1.74970600 |
| C | -1.60900900 | 0.95890000  | -2.98793100 |
| H | -0.57845400 | 1.31545700  | -3.04478400 |
| H | -1.92484200 | 0.58977100  | -3.96586000 |
| H | -2.25298000 | 1.78330200  | -2.67780600 |
| C | -0.81134500 | -1.26721500 | -2.22170000 |
| H | 0.23102600  | -0.95079600 | -2.12822300 |
| H | -1.04451200 | -2.01696700 | -1.46094100 |
| H | -0.98424000 | -1.67455700 | -3.22069100 |
| N | -1.68943300 | -0.11092400 | -1.98442100 |

**TS-AR**

|   |             |             |             |
|---|-------------|-------------|-------------|
| C | -0.39796600 | -1.26858300 | 0.94546400  |
| C | -1.04193600 | -0.45169200 | 0.02327000  |
| C | 1.41090900  | 0.88885500  | 0.27688600  |
| C | 1.78873100  | -0.09334900 | 1.39458700  |
| C | 0.48481700  | -0.70410700 | 2.01032300  |
| H | -0.29970600 | 0.65835400  | -2.56419200 |
| H | -0.24776900 | -2.30129400 | 0.64387600  |
| C | 0.45227300  | 1.03663600  | -1.87308100 |
| C | 2.55783600  | 1.73624500  | -0.22369600 |
| H | -0.01931100 | 0.09875300  | 2.55556700  |
| C | 2.35712200  | 2.42363300  | -1.36547400 |
| C | 1.15148300  | 2.17674000  | -2.15096300 |
| H | 3.45863100  | 1.84241700  | 0.37257600  |
| H | 0.96902000  | 2.73932300  | -3.05740300 |
| N | 0.74894400  | 0.21780900  | -0.83289100 |
| C | 3.34661600  | 3.34439600  | -1.85885900 |
| N | 4.12563800  | 4.10038500  | -2.26103200 |
| C | 2.80866800  | -1.14215900 | 1.00673700  |
| C | 3.96727700  | -1.26941600 | 1.77864000  |
| C | 2.63161700  | -2.01175700 | -0.07761100 |

|   |             |             |             |
|---|-------------|-------------|-------------|
| C | 4.92802500  | -2.23272000 | 1.48642100  |
| H | 4.11943800  | -0.59992800 | 2.62218500  |
| C | 3.59275600  | -2.97565800 | -0.36968200 |
| H | 1.75310100  | -1.90536100 | -0.70472000 |
| C | 4.74133100  | -3.09232500 | 0.40897200  |
| H | 5.82136800  | -2.30763200 | 2.09860700  |
| H | 3.44316900  | -3.63818600 | -1.21672700 |
| H | 5.48708500  | -3.84556000 | 0.17499100  |
| H | 2.23889900  | 0.51241700  | 2.19201600  |
| H | 0.76564500  | -1.47705000 | 2.73057400  |
| O | -1.51715700 | -1.05581900 | -1.13038300 |
| C | -4.67384400 | -2.37580100 | -2.05632400 |
| C | -4.93220100 | -1.93063800 | -0.60128800 |
| H | -5.41761900 | -1.98919800 | -2.75662100 |
| H | -4.63632000 | -3.46642600 | -2.14937400 |
| H | -5.57371700 | -1.04366800 | -0.55401400 |
| H | -5.37469700 | -2.71834800 | 0.01271200  |
| B | -2.81191000 | -1.47234800 | -1.18661300 |
| O | -3.64127100 | -1.59548100 | -0.09712900 |
| O | -3.39323300 | -1.83724200 | -2.37200600 |
| C | -1.66947900 | 0.83710800  | 0.34052000  |
| H | -1.63993100 | 1.60208200  | -0.43017100 |
| C | -2.31478700 | 1.02683400  | 1.51169000  |
| H | -2.40897300 | 0.19172200  | 2.20432200  |
| N | -2.86624500 | 2.19357200  | 1.95788700  |
| C | -2.83123600 | 3.34853900  | 1.08811800  |
| H | -3.48617400 | 3.23123300  | 0.21170200  |
| H | -3.14833400 | 4.22968400  | 1.64924300  |
| H | -1.80824300 | 3.50703200  | 0.73426200  |
| C | -3.95335900 | 2.13138900  | 2.91460600  |
| H | -3.96237600 | 3.04020400  | 3.52214700  |
| H | -4.93363500 | 2.02705600  | 2.42842800  |
| H | -3.80519900 | 1.27532200  | 3.57643400  |
| H | 0.69219800  | 1.61172600  | 0.72951400  |

**INT-AF**

|   |             |             |             |
|---|-------------|-------------|-------------|
| C | -0.17965800 | -0.22333200 | 0.28638500  |
| C | 0.27480200  | -0.44078400 | -1.17909200 |
| C | 1.67500000  | -0.97789200 | -1.31292000 |
| H | 0.21209500  | 0.49839300  | -1.73883100 |
| H | -0.39994800 | -1.13890400 | -1.68807800 |
| H | 1.82336600  | -1.86438800 | -1.92117800 |

|   |             |             |             |
|---|-------------|-------------|-------------|
| C | 2.78418400  | -0.45702400 | -0.76641700 |
| C | 4.11315600  | -1.03767900 | -0.91840700 |
| H | 4.17065000  | -1.93411800 | -1.52562800 |
| C | 5.20607300  | -0.50506800 | -0.34068700 |
| H | 5.09377100  | 0.37322000  | 0.28933000  |
| C | 7.39446600  | -0.72336600 | 0.64584800  |
| H | 8.43487500  | -0.76373200 | 0.31181400  |
| H | 7.20860500  | 0.26564100  | 1.07078900  |
| H | 7.25468000  | -1.47202100 | 1.44089300  |
| C | 6.72827800  | -2.16377600 | -1.21258000 |
| H | 6.27637700  | -3.03502100 | -0.71084000 |
| H | 7.80176800  | -2.33559000 | -1.31677000 |
| H | 6.29343800  | -2.08018500 | -2.21229000 |
| N | 6.51127600  | -0.93490200 | -0.48481800 |
| O | 2.75551200  | 0.63866800  | 0.07718000  |
| C | 1.21663300  | 3.56171100  | -1.28676300 |
| C | 1.23147100  | 3.83238200  | 0.23585300  |
| B | 2.15414300  | 1.82570400  | -0.19502100 |
| O | 1.69243800  | 2.22539200  | -1.42590400 |
| O | 1.99348500  | 2.76444800  | 0.79124500  |
| H | 1.88253500  | 4.23351800  | -1.83844800 |
| H | 0.20939700  | 3.63457900  | -1.70590600 |
| H | 0.22236300  | 3.80725000  | 0.65904700  |
| H | 1.70325100  | 4.78581600  | 0.48756900  |
| H | 0.70321500  | -0.24372100 | 0.93582100  |
| C | -0.90338700 | 1.07014800  | 0.55721600  |
| C | -0.94066200 | 1.57442000  | 1.86869200  |
| C | -1.65016900 | 1.74366400  | -0.41819000 |
| C | -1.71005300 | 2.68550300  | 2.19290500  |
| H | -0.37195200 | 1.05940100  | 2.63690100  |
| C | -2.41461900 | 2.86781800  | -0.09849500 |
| H | -1.65462500 | 1.37519500  | -1.44101300 |
| C | -2.45560500 | 3.34005500  | 1.20923500  |
| H | -1.72380800 | 3.04913100  | 3.21591100  |
| H | -2.98609200 | 3.36683400  | -0.87601400 |
| H | -3.05334400 | 4.21022900  | 1.46100700  |
| C | -1.00837100 | -2.80333100 | 2.73383000  |
| C | -0.99024300 | -3.66529900 | 1.46315400  |
| B | -1.03467100 | -1.48265900 | 0.85567600  |
| O | -1.28334500 | -1.49291000 | 2.27074100  |
| O | -0.57136300 | -2.77308600 | 0.44701300  |
| C | -2.88589700 | -1.96915000 | -0.98631600 |
| C | -4.08712100 | -1.77104700 | -1.64854000 |
| C | -5.01424300 | -0.89179600 | -1.08305700 |

|   |             |             |             |
|---|-------------|-------------|-------------|
| C | -4.71959800 | -0.25419500 | 0.12274700  |
| C | -3.49415600 | -0.51046500 | 0.71896800  |
| N | -2.60555600 | -1.33983400 | 0.16000100  |
| H | -2.11293700 | -2.64628800 | -1.33536200 |
| H | -4.30074800 | -2.28672000 | -2.57630900 |
| H | -5.42284700 | 0.42894500  | 0.58208100  |
| H | -3.18656000 | -0.05896900 | 1.65659000  |
| C | -6.27353000 | -0.65002900 | -1.74070400 |
| N | -7.28362500 | -0.45647000 | -2.26894600 |
| H | -0.03056000 | -2.82300300 | 3.23294500  |
| H | -1.77001200 | -3.12679200 | 3.45163700  |
| H | -2.00029900 | -4.05055400 | 1.24591000  |
| H | -0.30301500 | -4.51384300 | 1.52328500  |

### INT-AG

|   |             |             |             |
|---|-------------|-------------|-------------|
| C | -0.06751000 | -1.67114700 | -0.54338300 |
| C | -1.18058600 | -1.63325500 | -1.61319500 |
| C | -2.49550200 | -1.24101600 | -1.00360300 |
| H | -1.25288700 | -2.61196100 | -2.09860700 |
| H | -0.92157600 | -0.90657800 | -2.38888100 |
| H | -3.16755600 | -2.01431600 | -0.64611700 |
| C | -2.85628400 | 0.03612500  | -0.82016300 |
| C | -4.09918800 | 0.47986600  | -0.20782800 |
| H | -4.73968500 | -0.30362500 | 0.18153700  |
| C | -4.44537500 | 1.77968600  | -0.12792200 |
| H | -3.80007200 | 2.52976400  | -0.57914100 |
| C | -6.09735300 | 3.53641900  | -0.02377800 |
| H | -6.69070900 | 4.03621600  | 0.74658900  |
| H | -5.27946100 | 4.20081300  | -0.31165400 |
| H | -6.73626500 | 3.37370700  | -0.90483900 |
| C | -6.51976700 | 1.37096900  | 1.03884700  |
| H | -7.01129100 | 0.77978900  | 0.24975200  |
| H | -7.28289100 | 1.92318600  | 1.59116000  |
| H | -6.02505600 | 0.68127600  | 1.72801900  |
| N | -5.55116200 | 2.30214200  | 0.50670200  |
| O | -2.02552200 | 1.05033300  | -1.28710500 |
| C | 0.53468300  | 2.99082000  | 0.22032600  |
| C | 0.30940500  | 1.87745700  | 1.26220600  |
| B | -1.09306800 | 1.60254100  | -0.46840600 |
| O | -0.24069600 | 2.58524700  | -0.90634600 |
| O | -0.90375900 | 1.25123000  | 0.85043100  |
| H | 1.58482500  | 3.09559200  | -0.06586700 |

|               |             |             |             |   |             |             |             |
|---------------|-------------|-------------|-------------|---|-------------|-------------|-------------|
| H             | 0.16541500  | 3.95964400  | 0.57525300  | O | -2.26532500 | -0.24849700 | 1.66422700  |
| H             | 0.19983900  | 2.25797600  | 2.28015500  | C | -4.89916800 | -0.09598900 | -0.06692000 |
| H             | 1.11546700  | 1.13204300  | 1.24187100  | C | -4.67774300 | 1.37354400  | 0.37870000  |
| H             | -0.14601600 | -0.75601600 | 0.04952200  | B | -3.14512400 | 0.79043200  | -1.15750000 |
| C             | -0.25277100 | -2.82641100 | 0.41826700  | O | -3.90789900 | -0.34211100 | -1.05932600 |
| C             | -0.50366000 | -2.55359700 | 1.76505000  | O | -3.58316800 | 1.84411700  | -0.40190500 |
| C             | -0.19694700 | -4.16091600 | 0.00073900  | C | -1.07621100 | 1.92497900  | -1.81743700 |
| C             | -0.68674400 | -3.58619800 | 2.68080400  | C | 0.24687500  | 1.75697100  | -1.80378700 |
| H             | -0.56929500 | -1.51629300 | 2.08483800  | C | 0.82633700  | 0.35516400  | -1.73840700 |
| C             | -0.37070300 | -5.19391600 | 0.91758300  | C | -0.11668400 | -0.57625000 | -2.48302300 |
| H             | -0.01069400 | -4.39750300 | -1.04304000 | C | -1.42738700 | -0.33368900 | -2.47961400 |
| C             | -0.61564300 | -4.91068500 | 2.25935400  | N | -1.96755900 | 0.85483700  | -1.96962700 |
| H             | -0.88584400 | -3.35523600 | 3.72264900  | H | -1.54089200 | 2.90088700  | -1.73113000 |
| H             | -0.31831200 | -6.22428300 | 0.58026600  | H | 0.90415800  | 2.61572600  | -1.76547600 |
| H             | -0.75465800 | -5.71871900 | 2.97049500  | H | 0.28318800  | -1.47167700 | -2.94185000 |
| C             | 5.55274500  | 2.61606900  | 1.56974600  | H | -2.15162300 | -1.03137300 | -2.88548000 |
| C             | 5.16520600  | 3.50219300  | 0.36762000  | C | 0.94122300  | -0.12506400 | -0.21524000 |
| B             | 4.10351900  | 1.52528500  | 0.24453800  | C | 2.14949600  | 0.29952000  | -2.38703900 |
| O             | 5.00275200  | 1.33470400  | 1.26188100  | N | 3.17669800  | 0.26223800  | -2.91661000 |
| O             | 4.08134200  | 2.80692800  | -0.25254100 | H | -0.82676600 | -0.66644700 | 4.52669600  |
| C             | 2.40242100  | 0.70490500  | -1.33979800 | H | -2.68454900 | 0.50117800  | 3.54035700  |
| C             | 1.56166400  | -0.21924100 | -1.80814200 | H | -3.31147500 | -1.13286100 | 3.21471600  |
| C             | 1.37535500  | -1.57856100 | -1.15848100 | H | -1.16417100 | -2.14661000 | 3.59801300  |
| C             | 2.42520400  | -1.76315000 | -0.07961700 | H | -5.55120700 | 2.00445600  | 0.19077100  |
| C             | 3.23716500  | -0.78596700 | 0.32525600  | H | -4.41019000 | 1.43932000  | 1.43691000  |
| N             | 3.24915400  | 0.49528400  | -0.24543200 | H | -5.89026300 | -0.25691500 | -0.50078800 |
| H             | 2.48074900  | 1.68500200  | -1.79715600 | H | -4.75077100 | -0.79617600 | 0.75934700  |
| H             | 0.96368400  | 0.02524700  | -2.67766100 | O | -0.41338200 | -0.00670600 | 0.22374900  |
| H             | 2.47946100  | -2.73155000 | 0.40340100  | C | 1.36657700  | -1.59451100 | -0.16756300 |
| H             | 3.95377500  | -0.92774500 | 1.12604900  | C | 0.41515900  | -2.61860000 | -0.15584900 |
| C             | 1.53869500  | -2.62905100 | -2.19120200 | C | 2.72194400  | -1.92999300 | -0.18445700 |
| N             | 1.64940700  | -3.44504400 | -3.00365500 | C | 0.81393300  | -3.95186600 | -0.14583200 |
| H             | 5.11070300  | 2.97708900  | 2.50420800  | H | -0.64147300 | -2.36969500 | -0.17428700 |
| H             | 6.63298000  | 2.52806000  | 1.70092100  | C | 3.11877100  | -3.26403100 | -0.18412700 |
| H             | 5.98391200  | 3.59572300  | -0.35279600 | H | 3.46541500  | -1.13934300 | -0.19541700 |
| H             | 4.83739500  | 4.50097500  | 0.66243900  | C | 2.16688500  | -4.27909600 | -0.15939100 |
|               |             |             |             | H | 0.06374900  | -4.73632600 | -0.13254800 |
|               |             |             |             | H | 4.17602500  | -3.50823000 | -0.19895800 |
|               |             |             |             | H | 2.47732200  | -5.31902900 | -0.15271600 |
|               |             |             |             | C | 1.81887500  | 0.72869700  | 0.66647900  |
|               |             |             |             | H | 1.72971000  | 0.46751400  | 1.71665900  |
|               |             |             |             | C | 2.68046400  | 1.68290800  | 0.28214400  |
|               |             |             |             | H | 2.80009200  | 1.95158000  | -0.76351800 |
|               |             |             |             | N | 3.54395800  | 2.37814300  | 1.10809500  |
| <b>INT-AH</b> |             |             |             |   |             |             |             |
| C             | -1.13046700 | -1.05285400 | 3.55145700  |   |             |             |             |
| C             | -2.46520600 | -0.45873100 | 3.05862900  |   |             |             |             |
| B             | -0.89872500 | -0.29514100 | 1.44368600  |   |             |             |             |
| O             | -0.18432500 | -0.66144400 | 2.56100600  |   |             |             |             |

|   |            |            |             |
|---|------------|------------|-------------|
| C | 3.41191700 | 2.17774700 | 2.53315600  |
| H | 3.53426700 | 1.11748200 | 2.77035100  |
| H | 4.19485000 | 2.73906200 | 3.04695600  |
| H | 2.43075800 | 2.50439900 | 2.91396900  |
| C | 3.89110300 | 3.72603600 | 0.69906000  |
| H | 4.06052600 | 3.74562300 | -0.38005000 |
| H | 3.10728200 | 4.46002100 | 0.94154500  |
| H | 4.81623900 | 4.03224400 | 1.19435000  |

**INT-AI**

|   |             |             |             |
|---|-------------|-------------|-------------|
| C | -4.63598000 | 0.82268400  | 1.47140900  |
| C | -5.45246400 | 0.65134100  | 0.17393500  |
| B | -3.26801800 | 0.29659400  | -0.23816200 |
| O | -3.28148700 | 0.82396000  | 1.03707000  |
| O | -4.52968400 | 0.10161400  | -0.75711200 |
| C | -0.85766400 | 0.03302900  | -0.30462900 |
| H | -4.85905100 | 1.75571800  | 1.99481200  |
| H | -5.81916100 | 1.61276000  | -0.20438800 |
| H | -6.30378300 | -0.02305300 | 0.29513500  |
| H | -4.78981800 | -0.01360900 | 2.16263900  |
| O | -2.15639500 | 0.00147200  | -0.94640700 |
| C | -0.86231600 | -1.00658100 | 0.81747400  |
| C | -1.30721400 | -2.30114100 | 0.49918500  |
| C | -0.44073500 | -0.76190300 | 2.12588500  |
| C | -1.27802300 | -3.32056200 | 1.44401200  |
| H | -1.65383600 | -2.49593800 | -0.50906500 |
| C | -0.40842600 | -1.78626300 | 3.07256500  |
| H | -0.16590000 | 0.24114100  | 2.42627000  |
| C | -0.81402800 | -3.07194600 | 2.73539500  |
| H | -1.62113100 | -4.31392000 | 1.17086700  |
| H | -0.07636300 | -1.56769900 | 4.08307300  |
| H | -0.78677500 | -3.86833400 | 3.47247800  |
| C | -0.53830000 | 1.45978200  | 0.07493500  |
| H | -1.22169700 | 2.18386500  | -0.35705400 |
| C | 0.52609500  | 1.89266400  | 0.76601000  |
| H | 1.25156500  | 1.18995300  | 1.17485000  |
| N | 0.82614100  | 3.21828900  | 1.10404000  |
| C | -0.04932700 | 4.22702900  | 0.54945200  |
| H | -1.07728800 | 4.02824800  | 0.86283700  |
| H | 0.24782000  | 5.20686000  | 0.93005600  |
| H | -0.02219100 | 4.25040000  | -0.55340400 |
| C | 2.23405200  | 3.54960200  | 1.00703800  |

|   |             |             |             |
|---|-------------|-------------|-------------|
| H | 2.82668100  | 2.78411000  | 1.51751800  |
| H | 2.58676000  | 3.62035600  | -0.03787200 |
| H | 2.42258200  | 4.50879200  | 1.49624100  |
| C | 0.14968800  | -0.17472600 | -3.83732300 |
| C | -0.51799900 | -1.50425600 | -3.47734200 |
| B | 0.11491900  | -0.41976500 | -1.56650500 |
| O | 0.13478800  | 0.55044000  | -2.62137600 |
| O | -0.14141300 | -1.71731500 | -2.12864700 |
| C | 2.49318400  | 0.53338900  | -1.14773800 |
| C | 3.75551300  | 0.56362800  | -0.57441800 |
| C | 4.14511600  | -0.51403800 | 0.22278200  |
| C | 3.27713500  | -1.59379900 | 0.40661800  |
| C | 2.03804800  | -1.55297500 | -0.21186900 |
| N | 1.66720600  | -0.50190000 | -0.95511200 |
| H | 2.09178900  | 1.32190100  | -1.77524900 |
| H | 4.41576700  | 1.40659700  | -0.73672300 |
| H | 3.56115700  | -2.44322500 | 1.01460700  |
| H | 1.30850600  | -2.35184100 | -0.12780100 |
| C | 5.44257400  | -0.51444900 | 0.84982800  |
| N | 6.48343500  | -0.51151700 | 1.35317100  |
| H | 1.18512500  | -0.34193800 | -4.17578600 |
| H | -0.17892800 | -2.33806000 | -4.10060700 |
| H | -1.60991200 | -1.41979700 | -3.55069400 |
| H | -0.38394900 | 0.38403200  | -4.61155000 |

**INT-AJ**

|   |             |             |             |
|---|-------------|-------------|-------------|
| C | -4.85658900 | -2.29864400 | -0.23141800 |
| C | -5.14457500 | -2.40285300 | 1.28205300  |
| B | -3.04758800 | -1.67710800 | 0.94507500  |
| O | -3.45519100 | -2.05516200 | -0.30969700 |
| O | -4.02480700 | -1.77773900 | 1.90285000  |
| C | -0.89503700 | -0.96664600 | 0.22518400  |
| H | -5.10277200 | -3.21346700 | -0.77494300 |
| H | -5.20325500 | -3.44468800 | 1.61509100  |
| H | -6.06267200 | -1.88866800 | 1.57549200  |
| H | -5.38936900 | -1.45980100 | -0.69212400 |
| O | -1.79855800 | -1.23464300 | 1.25167400  |
| C | -1.33113800 | 0.12676900  | -0.68058200 |
| C | -2.07393300 | 1.19373000  | -0.15834100 |
| C | -1.05452000 | 0.11512600  | -2.05457200 |
| C | -2.47412000 | 2.25156600  | -0.97075200 |
| H | -2.32899700 | 1.19046000  | 0.89779100  |



|   |             |             |             |   |             |             |             |
|---|-------------|-------------|-------------|---|-------------|-------------|-------------|
| C | -1.44316100 | 1.17745500  | -2.86303400 | C | -6.15104500 | 0.38938900  | -0.07393300 |
| H | -0.56264400 | -0.74886400 | -2.48890900 | C | -6.49625800 | 0.28884100  | 1.42770100  |
| C | -2.14150600 | 2.25700300  | -2.32286200 | B | -4.28504500 | 0.06292800  | 1.12897300  |
| H | -3.03829500 | 3.07593500  | -0.54498100 | O | -4.78071000 | 0.00498100  | -0.14838800 |
| H | -1.22116700 | 1.15096800  | -3.92527600 | O | -5.23268800 | 0.31078600  | 2.08690200  |
| H | -2.44956300 | 3.08190000  | -2.95729600 | C | 6.77906600  | 1.60829600  | -0.01376900 |
| C | 0.27529300  | -1.61325200 | 0.23659300  | C | 6.08240500  | 2.49288300  | 1.04214500  |
| H | 0.38616600  | -2.35844200 | 1.02254200  | B | 4.76862500  | 0.75343600  | 0.50438300  |
| C | 1.49551200  | -1.35566600 | -0.60292100 | O | 5.77142300  | 0.68613500  | -0.42976800 |
| H | 1.21615600  | -0.74424000 | -1.46535100 | O | 4.93898500  | 1.73820300  | 1.44366700  |
| N | 2.00711900  | -2.62794100 | -1.15977400 | C | 2.63951600  | -0.03664900 | 1.46876700  |
| C | 2.85109500  | -3.37006600 | -0.23766100 | C | 1.55715000  | -0.81514400 | 1.47536400  |
| H | 2.37271600  | -3.44326100 | 0.74200900  | C | 1.25486700  | -1.79975400 | 0.36029400  |
| H | 3.00134000  | -4.38260900 | -0.62662800 | C | 2.49509700  | -1.99508100 | -0.48450500 |
| H | 3.84290700  | -2.90601700 | -0.09471600 | C | 3.55028800  | -1.18163200 | -0.41538700 |
| C | 2.69390000  | -2.43234200 | -2.42473400 | N | 3.64697700  | -0.12795300 | 0.49947500  |
| H | 2.01455200  | -1.96212700 | -3.14413400 | H | 2.81748200  | 0.71039100  | 2.23362400  |
| H | 3.59844300  | -1.80915500 | -2.33611700 | H | 0.82755300  | -0.71036000 | 2.26940100  |
| H | 2.98203900  | -3.40855200 | -2.82878200 | H | 2.51383700  | -2.82869200 | -1.17646300 |
| C | 4.75367800  | 0.06452500  | 0.59272700  | H | 4.41793300  | -1.30554000 | -1.05337800 |
| C | 4.27807700  | -0.79182600 | 1.77725600  | C | -2.00576700 | -0.11055000 | 0.47065100  |
| B | 2.58339400  | -0.49596500 | 0.24959400  | C | 0.87367100  | -3.09884600 | 0.95988700  |
| O | 3.80954200  | -0.20104200 | -0.42882500 | N | 0.56256000  | -4.10717600 | 1.43395600  |
| O | 2.87957300  | -0.91906800 | 1.58938800  | H | -6.75438800 | -0.27633900 | -0.69484000 |
| C | 1.71077000  | 1.84200000  | -0.60445700 | H | -7.00795200 | -0.64939900 | 1.66716900  |
| C | 0.95814800  | 3.00356600  | -0.56351800 | H | -7.10839200 | 1.12240800  | 1.77920400  |
| C | 0.27827800  | 3.30033600  | 0.61938400  | H | -6.25309600 | 1.41301500  | -0.44979000 |
| C | 0.37733700  | 2.44244200  | 1.71561700  | H | 6.71263600  | 2.69181800  | 1.91139400  |
| C | 1.14363200  | 1.29450600  | 1.58285200  | H | 5.74846000  | 3.44680800  | 0.62115500  |
| N | 1.78857600  | 1.01834400  | 0.44571700  | H | 7.61917500  | 1.04921300  | 0.41092100  |
| H | 2.27905700  | 1.53376100  | -1.47652400 | H | 7.13304500  | 2.17640100  | -0.87652200 |
| H | 0.88433400  | 3.65002100  | -1.42860900 | O | -2.97443800 | -0.11663500 | 1.45678900  |
| H | -0.14742200 | 2.65325200  | 2.63911800  | C | -1.95010700 | 1.13292500  | -0.33317900 |
| H | 1.26941100  | 0.55940600  | 2.37054200  | C | -1.68419200 | 1.09156400  | -1.70578300 |
| C | -0.55773400 | 4.47132800  | 0.69285100  | C | -2.19546600 | 2.36562800  | 0.28284000  |
| N | -1.23932200 | 5.40393600  | 0.74764300  | C | -1.63241900 | 2.27145600  | -2.44159400 |
| H | 4.74038700  | 1.13362100  | 0.85884000  | H | -1.54816100 | 0.12479900  | -2.18246600 |
| H | 4.49611100  | -0.32828300 | 2.74551800  | C | -2.14294300 | 3.54127600  | -0.45719800 |
| H | 4.74443800  | -1.78633200 | 1.75865500  | H | -2.41447000 | 2.39408700  | 1.34623800  |
| H | 5.75953700  | -0.19292700 | 0.24923800  | C | -1.85681600 | 3.49740200  | -1.82026400 |
|   |             |             |             | H | -1.43086300 | 2.23107100  | -3.50747400 |
|   |             |             |             | H | -2.32359200 | 4.49391400  | 0.03042600  |
|   |             |             |             | H | -1.81823800 | 4.41571200  | -2.39748100 |
|   |             |             |             | C | -1.18134500 | -1.15862000 | 0.38839600  |

INT-AE

|   |             |             |             |
|---|-------------|-------------|-------------|
| H | -1.38275600 | -1.98891900 | 1.06234000  |
| C | 0.04051500  | -1.23272400 | -0.49545800 |
| H | 0.36044700  | -0.21314900 | -0.73836000 |
| N | -0.24509600 | -1.88075400 | -1.76460700 |
| C | -0.59680100 | -3.28533100 | -1.73245300 |
| H | -1.28429600 | -3.48265400 | -0.90653800 |
| H | -1.10108900 | -3.54763900 | -2.66851100 |
| H | 0.27166800  | -3.95636600 | -1.61805800 |
| C | 0.57389700  | -1.52070100 | -2.90475600 |
| H | 0.82273000  | -0.45601800 | -2.85672800 |
| H | 1.51498500  | -2.08448100 | -2.99252300 |
| H | -0.00208700 | -1.69625600 | -3.82150800 |

**TS-INT-Z**

|   |             |             |             |
|---|-------------|-------------|-------------|
| C | -1.93594100 | 1.74335900  | -0.47115900 |
| C | -1.56640200 | 2.35295900  | -1.79059200 |
| C | -1.12944500 | 0.94654400  | -1.49504800 |
| H | -0.80260400 | 3.12280700  | -1.78150500 |
| H | -2.35421400 | 2.49117200  | -2.52355200 |
| H | -1.67252600 | 0.14283700  | -1.98321800 |
| C | 0.27334300  | 0.62639000  | -1.20109300 |
| C | 0.86922100  | -0.55315100 | -1.52326000 |
| H | 0.27110000  | -1.24434700 | -2.11130200 |
| C | 2.09828600  | -1.00477400 | -0.98769000 |
| H | 2.62213300  | -0.37461500 | -0.27191000 |
| C | 3.90950600  | -2.57049400 | -0.77007000 |
| H | 4.70198600  | -2.98072300 | -1.40143200 |
| H | 4.34687000  | -1.82180100 | -0.10429800 |
| H | 3.50508100  | -3.38714300 | -0.15072200 |
| C | 2.33063700  | -2.79536600 | -2.62535400 |
| H | 1.58387500  | -3.50280000 | -2.23497000 |
| H | 3.13595000  | -3.36578200 | -3.09393100 |
| H | 1.85710400  | -2.17588700 | -3.39022000 |
| N | 2.89807900  | -1.94790600 | -1.59605600 |
| O | 0.92642500  | 1.61627300  | -0.48127100 |
| C | 3.86666600  | 2.82773400  | -2.10036200 |
| C | 3.98671500  | 3.38974800  | -0.66633700 |
| B | 2.10747000  | 2.16725400  | -0.86955500 |
| O | 2.76732800  | 1.92182700  | -2.04173100 |
| O | 2.73351800  | 3.08433400  | -0.05588200 |
| H | 4.76317000  | 2.29386200  | -2.42231800 |
| H | 3.64239900  | 3.61242400  | -2.82998700 |

|   |             |             |             |
|---|-------------|-------------|-------------|
| H | 4.15161800  | 4.46912000  | -0.64604300 |
| H | 4.78632000  | 2.89988500  | -0.10046500 |
| H | -1.35600600 | 2.07970900  | 0.38248300  |
| C | -3.32734400 | 1.33461200  | -0.14838100 |
| C | -3.75534200 | 1.36814600  | 1.18337600  |
| C | -4.22517900 | 0.89186800  | -1.12583400 |
| C | -5.04200200 | 0.96640800  | 1.53036300  |
| H | -3.05885800 | 1.70116600  | 1.94962000  |
| C | -5.51122600 | 0.49139000  | -0.78003800 |
| H | -3.91840100 | 0.85312300  | -2.16830200 |
| C | -5.92607000 | 0.52637200  | 0.54959100  |
| H | -5.35228500 | 0.99608800  | 2.57010600  |
| H | -6.19211800 | 0.14799900  | -1.55247300 |
| H | -6.92897600 | 0.21102600  | 0.81747500  |
| C | 0.66507800  | 2.31606000  | 2.56659400  |
| C | 2.05583600  | 1.67831200  | 2.73299900  |
| B | 0.60643700  | 0.18144900  | 1.89063900  |
| O | -0.20535600 | 1.21070200  | 2.30400200  |
| O | 1.95129200  | 0.41860900  | 2.06131900  |
| C | -1.24588700 | -1.21903800 | 1.06438000  |
| C | -1.71041900 | -2.29151000 | 0.40026000  |
| C | -0.79529700 | -3.34458300 | -0.00012600 |
| C | 0.54234700  | -3.21317600 | 0.36175600  |
| C | 1.02270700  | -2.04815500 | 0.94397800  |
| N | 0.11762500  | -1.04437000 | 1.34439700  |
| H | -1.88913100 | -0.41952500 | 1.40942900  |
| H | -2.77076200 | -2.37470000 | 0.19529100  |
| H | 1.24261600  | -4.01586500 | 0.15311200  |
| H | 1.99731000  | -2.00130400 | 1.41220300  |
| C | -1.24263200 | -4.48759700 | -0.71214700 |
| N | -1.59518300 | -5.41903600 | -1.31285000 |
| H | 0.64391600  | 2.99581100  | 1.70836200  |
| H | 0.32538800  | 2.84118000  | 3.46172100  |
| H | 2.30209000  | 1.49699300  | 3.78480200  |
| H | 2.83925900  | 2.27600900  | 2.26556000  |

**TS-INT-AA**

|   |            |             |             |
|---|------------|-------------|-------------|
| C | 2.08303100 | -1.42688600 | -1.75532000 |
| C | 1.54831300 | -1.83977100 | -3.09529800 |
| C | 1.23793600 | -0.46517000 | -2.56429600 |
| H | 0.73079600 | -2.55096400 | -3.10999300 |
| H | 2.25263200 | -1.89562500 | -3.91776700 |

|   |             |             |             |                  |             |             |             |
|---|-------------|-------------|-------------|------------------|-------------|-------------|-------------|
| H | 1.75328600  | 0.37229000  | -3.02285800 | H                | -2.64685900 | -2.29403300 | 3.93052000  |
| C | -0.10529300 | -0.15386700 | -2.04652900 | H                | -2.02979800 | -1.17344700 | 5.16407000  |
| C | -0.57431900 | 1.12006600  | -1.92146300 | H                | -3.73697200 | 0.37445200  | 4.55550100  |
| H | 0.05842600  | 1.93816600  | -2.24179300 | H                | -4.27361700 | -0.70032400 | 3.24688900  |
| C | -1.78623900 | 1.39347400  | -1.23140200 | N                | -2.76925000 | 0.29159400  | -1.28498900 |
| O | -0.80189900 | -1.21895600 | -1.64110600 | C                | -3.90477200 | 0.53672800  | -0.36880100 |
| C | -2.96454600 | -3.16886100 | -0.32198200 | C                | -3.30721300 | 0.19055800  | -2.67896500 |
| C | -2.67838600 | -2.37936100 | 0.95999800  | H                | -4.59635300 | -0.30292400 | -0.46072700 |
| B | -2.06967800 | -1.15386000 | -0.91464600 | H                | -3.54216000 | 0.60744100  | 0.65520400  |
| O | -2.99024300 | -2.17834000 | -1.32426800 | H                | -4.40730500 | 1.46415500  | -0.66084900 |
| O | -1.91431300 | -1.27445200 | 0.52174000  | H                | -3.75564900 | 1.14915900  | -2.95310000 |
| H | -3.91787600 | -3.70545900 | -0.29290400 | H                | -4.04343900 | -0.61165800 | -2.70884800 |
| H | -2.16051100 | -3.89291100 | -0.51530200 | H                | -2.48189600 | -0.03864500 | -3.35145900 |
| H | -2.11515400 | -2.95248800 | 1.70391900  | H                | -2.26904800 | 2.36284300  | -1.35740100 |
| H | -3.61861600 | -2.03026800 | 1.42077800  |                  |             |             |             |
| H | 1.55867500  | -1.86362700 | -0.90791900 |                  |             |             |             |
| C | 3.54294500  | -1.17929500 | -1.54742200 | <b>TS-INT-AG</b> |             |             |             |
| C | 4.09134900  | 0.10415000  | -1.58856700 | C                | -0.56748100 | -1.41032500 | 0.22570700  |
| C | 4.38928900  | -2.25967000 | -1.27392100 | C                | -1.78320000 | -1.45797300 | -0.65137600 |
| C | 5.45061600  | 0.30803800  | -1.35783900 | C                | -2.91900900 | -0.72345000 | 0.01115600  |
| H | 3.45449300  | 0.96037600  | -1.78879600 | H                | -2.07030100 | -2.48588000 | -0.88235900 |
| C | 5.74620700  | -2.06051200 | -1.04581500 | H                | -1.57114500 | -0.96987300 | -1.61035400 |
| H | 3.97167100  | -3.26268600 | -1.24381700 | H                | -3.56359100 | -1.26379500 | 0.69703000  |
| C | 6.28189300  | -0.77372200 | -1.08651600 | C                | -3.14173200 | 0.58514500  | -0.15773200 |
| H | 5.84801200  | 1.31779000  | -1.38571700 | C                | -4.21142000 | 1.34372900  | 0.47626400  |
| H | 6.38853500  | -2.91024700 | -0.83595400 | H                | -4.80314100 | 0.80537500  | 1.20833300  |
| H | 7.34064900  | -0.61800600 | -0.90594000 | C                | -4.46916000 | 2.63111300  | 0.17221900  |
| C | -2.31965500 | -1.26663700 | 4.11379900  | H                | -3.89385800 | 3.11984600  | -0.61162300 |
| C | -3.40049900 | -0.22988600 | 3.70916800  | C                | -5.98691300 | 4.49337800  | -0.04589400 |
| B | -1.50462400 | 0.11745200  | 2.53177200  | H                | -6.39817400 | 5.27803900  | 0.59479400  |
| O | -1.19160600 | -0.97692400 | 3.29308200  | H                | -5.21486300 | 4.93656500  | -0.67911000 |
| O | -2.76522600 | 0.61778000  | 2.75462400  | H                | -6.79126800 | 4.11643300  | -0.69542600 |
| C | 0.72746900  | 0.29821800  | 1.53946800  | C                | -6.28382500 | 2.85671400  | 1.74922000  |
| C | 1.67850200  | 0.96482400  | 0.85859200  | H                | -6.95120000 | 2.10219700  | 1.30285200  |
| C | 1.35924700  | 2.26261100  | 0.30438500  | H                | -6.89375800 | 3.63872000  | 2.20619900  |
| C | 0.07877900  | 2.76616300  | 0.45940700  | H                | -5.69479900 | 2.37427500  | 2.53383900  |
| C | -0.91900000 | 1.98181400  | 1.03613500  | N                | -5.39757200 | 3.45340200  | 0.77590600  |
| N | -0.54537400 | 0.83107100  | 1.73224500  | O                | -2.34549600 | 1.31018900  | -1.03936100 |
| H | 0.88977600  | -0.67019400 | 1.99595000  | C                | 0.01196700  | 3.88334600  | -0.42193400 |
| H | 2.66214800  | 0.53443700  | 0.71735900  | C                | 0.14745600  | 3.02071900  | 0.84755100  |
| H | -0.18959300 | 3.72487800  | 0.02866400  | B                | -1.37776100 | 2.12090000  | -0.53612800 |
| H | -1.88721500 | 2.38439000  | 1.30218900  | O                | -0.77941400 | 3.09120900  | -1.30780800 |
| C | 2.34580100  | 2.99461200  | -0.41904700 | O                | -0.92524400 | 2.08795200  | 0.76071700  |
| N | 3.15471000  | 3.56300700  | -1.02914300 |                  |             |             |             |

|                 |             |             |             |   |             |             |             |
|-----------------|-------------|-------------|-------------|---|-------------|-------------|-------------|
| H               | 0.98053600  | 4.10818900  | -0.87483600 | H | 0.13813200  | 0.35456100  | -2.23174500 |
| H               | -0.51575800 | 4.82259300  | -0.22233300 | H | -0.42386100 | -1.28509300 | -1.94836500 |
| H               | 0.05755600  | 3.60065600  | 1.76901100  | H | 1.86250400  | -1.84350600 | -2.16407900 |
| H               | 1.09774900  | 2.47514500  | 0.86125400  | C | 2.66984000  | -0.47433400 | -0.84818400 |
| H               | -0.25257100 | -0.41198500 | 0.52669600  | C | 4.01377000  | -1.03809500 | -0.87797700 |
| C               | 0.04323400  | -2.50539900 | 0.89726900  | H | 4.14831700  | -1.91616500 | -1.49964200 |
| C               | 1.02861000  | -2.24775000 | 1.88376200  | C | 5.03399900  | -0.50321300 | -0.17806700 |
| C               | -0.21446900 | -3.85913500 | 0.56829900  | H | 4.84097600  | 0.35747900  | 0.45664200  |
| C               | 1.70807700  | -3.28022000 | 2.50969700  | C | 7.14204200  | -0.66526400 | 0.99059800  |
| H               | 1.23898300  | -1.21451900 | 2.14745500  | H | 8.20336700  | -0.65137000 | 0.72842100  |
| C               | 0.47656300  | -4.88365400 | 1.19517300  | H | 6.87905400  | 0.30918600  | 1.40778800  |
| H               | -0.93363900 | -4.09703400 | -0.20782900 | H | 6.98593300  | -1.42779900 | 1.76860300  |
| C               | 1.43833600  | -4.60720800 | 2.17013200  | C | 6.67197800  | -2.11040400 | -0.93267800 |
| H               | 2.45212700  | -3.05398300 | 3.26762400  | H | 6.19971600  | -3.00665800 | -0.49934000 |
| H               | 0.26914200  | -5.91265000 | 0.91839400  | H | 7.75480100  | -2.25037600 | -0.93530000 |
| H               | 1.97066300  | -5.41681900 | 2.65826100  | H | 6.33429900  | -2.01068000 | -1.96787300 |
| C               | 5.16621900  | 3.09009300  | 1.04657300  | N | 6.34886900  | -0.90917500 | -0.19829600 |
| C               | 4.38745000  | 4.08002800  | 0.15637400  | O | 2.54118200  | 0.59899100  | 0.00843900  |
| B               | 3.63873700  | 1.98788700  | -0.17414900 | C | 1.06867500  | 3.48669600  | -1.49833700 |
| O               | 4.76586300  | 1.80014500  | 0.58044100  | C | 0.91419700  | 3.75181300  | 0.01694400  |
| O               | 3.30676700  | 3.30667500  | -0.37422700 | B | 1.91748500  | 1.76771200  | -0.31646300 |
| C               | 1.76587200  | 1.14425500  | -1.53886300 | O | 1.56894400  | 2.15314200  | -1.58698200 |
| C               | 1.01612300  | 0.13486200  | -2.03676100 | O | 1.64079500  | 2.69906200  | 0.64876200  |
| C               | 1.30661900  | -1.22526800 | -1.68702500 | H | 1.78759600  | 4.16479300  | -1.96980100 |
| C               | 2.45992000  | -1.45811900 | -0.86947400 | H | 0.11405200  | 3.55307400  | -2.02613300 |
| C               | 3.18221200  | -0.42166400 | -0.38898900 | H | -0.13345200 | 3.70048500  | 0.33052000  |
| N               | 2.85900700  | 0.90608300  | -0.69518500 | H | 1.33334400  | 4.71461800  | 0.31966300  |
| H               | 1.57752000  | 2.18200000  | -1.78089000 | H | 0.28050300  | -0.41198000 | 0.68453300  |
| H               | 0.18425800  | 0.37283200  | -2.69086100 | C | -1.15775000 | 1.03259700  | 0.03004900  |
| H               | 2.73398600  | -2.47122200 | -0.59935300 | C | -1.43016700 | 1.48543900  | 1.34760200  |
| H               | 4.04476700  | -0.54738600 | 0.25271500  | C | -1.84381000 | 1.67783000  | -1.03067600 |
| C               | 0.63800800  | -2.31161000 | -2.30593000 | C | -2.30110900 | 2.53911000  | 1.58282700  |
| N               | 0.07635200  | -3.21017000 | -2.78619700 | H | -0.92283800 | 0.99691700  | 2.17560100  |
| H               | 4.89251500  | 3.18568300  | 2.10220700  | C | -2.72146300 | 2.72389800  | -0.78412800 |
| H               | 6.24853700  | 3.19306600  | 0.94985400  | H | -1.68379000 | 1.34612000  | -2.05161600 |
| H               | 4.99623000  | 4.45172000  | -0.67367800 | C | -2.95246700 | 3.17003200  | 0.51990500  |
| H               | 3.98841800  | 4.93044500  | 0.71267200  | H | -2.47378800 | 2.87402000  | 2.60122300  |
|                 |             |             |             | H | -3.23951300 | 3.19467400  | -1.61462300 |
|                 |             |             |             | H | -3.63509100 | 3.99289800  | 0.70370300  |
|                 |             |             |             | C | -0.31679500 | -2.99077900 | 2.06318100  |
|                 |             |             |             | C | 0.15119500  | -3.38489900 | 0.64510500  |
|                 |             |             |             | B | -1.62111300 | -2.03804300 | 0.50379100  |
|                 |             |             |             | O | -1.33732200 | -2.01225300 | 1.85342500  |
|                 |             |             |             | O | -0.92527100 | -2.98840700 | -0.20864300 |
| <b>TS-INTAF</b> |             |             |             |   |             |             |             |
| C               | -0.28813800 | -0.07300900 | -0.17917600 |   |             |             |             |
| C               | 0.21279300  | -0.48905500 | -1.53398400 |   |             |             |             |
| C               | 1.63276000  | -0.99278300 | -1.52956300 |   |             |             |             |

|   |             |             |             |
|---|-------------|-------------|-------------|
| C | -3.14830400 | -1.49687300 | -1.36719900 |
| C | -4.18462800 | -0.78724300 | -1.89930300 |
| C | -4.97432000 | 0.05216700  | -1.07321000 |
| C | -4.64414300 | 0.11878400  | 0.29783300  |
| C | -3.59678500 | -0.60508300 | 0.79142800  |
| N | -2.82690100 | -1.41339800 | -0.02639000 |
| H | -2.53456500 | -2.17348900 | -1.94822500 |
| H | -4.40708400 | -0.88309300 | -2.95514800 |
| H | -5.21228800 | 0.75140900  | 0.96897700  |
| H | -3.31281800 | -0.59955300 | 1.83455900  |
| C | -6.03603100 | 0.82799800  | -1.61363300 |
| N | -6.89863900 | 1.46623400  | -2.05829600 |
| H | 0.48881500  | -2.55850600 | 2.66173300  |
| H | -0.74808700 | -3.83838000 | 2.60584200  |
| H | 0.32254000  | -4.45776800 | 0.53563200  |
| H | 1.05473300  | -2.83899100 | 0.34915500  |

**TS-INT-AJ**

|   |             |             |             |
|---|-------------|-------------|-------------|
| C | -4.49012300 | -2.29236200 | 0.20867900  |
| C | -4.63938800 | -2.12244100 | 1.73506400  |
| B | -2.56826800 | -1.55047400 | 1.09135600  |
| O | -3.09155200 | -2.14861200 | -0.02604200 |
| O | -3.45270500 | -1.43978000 | 2.13298200  |
| C | -0.51839800 | -0.87759700 | 0.07361200  |
| H | -4.82590500 | -3.26873600 | -0.14720400 |
| H | -4.68716500 | -3.08766800 | 2.25082600  |
| H | -5.51424900 | -1.53096500 | 2.01343500  |
| H | -5.02308100 | -1.51039500 | -0.34295900 |
| O | -1.28693000 | -1.09922200 | 1.20479500  |
| C | -1.10944600 | 0.01817600  | -0.93089500 |
| C | -2.04244700 | 0.99456700  | -0.54752400 |
| C | -0.82481800 | -0.12196800 | -2.30111200 |
| C | -2.62786300 | 1.83733400  | -1.48893100 |
| H | -2.30051100 | 1.10335800  | 0.50196500  |
| C | -1.40709200 | 0.71952600  | -3.23614100 |
| H | -0.16959400 | -0.92207900 | -2.62898400 |
| C | -2.30137100 | 1.71391500  | -2.83415100 |
| H | -3.31577900 | 2.60846800  | -1.15862600 |
| H | -1.17769800 | 0.58924800  | -4.28913800 |
| H | -2.74855400 | 2.37648300  | -3.56772900 |
| C | 0.67963900  | -1.53486600 | 0.00304700  |
| H | 0.85844100  | -2.28210900 | 0.77254700  |

|   |             |             |             |
|---|-------------|-------------|-------------|
| C | 1.76166000  | -1.17592900 | -0.84856100 |
| H | 1.64494800  | -0.30760700 | -1.49469000 |
| N | 2.66738800  | -2.09950500 | -1.32905300 |
| C | 2.79618800  | -3.38478300 | -0.68219500 |
| H | 1.82735900  | -3.89819500 | -0.66675800 |
| H | 3.50809000  | -3.99601300 | -1.24010200 |
| H | 3.14582400  | -3.29643800 | 0.35586800  |
| C | 3.63245300  | -1.70867500 | -2.33294900 |
| H | 3.23315500  | -0.86188600 | -2.89639700 |
| H | 4.60082300  | -1.40336900 | -1.92037000 |
| H | 3.78875200  | -2.53909300 | -3.02889800 |
| C | 5.08911100  | -0.98781800 | 0.67650200  |
| C | 4.39810600  | -1.35929300 | 1.99845700  |
| B | 3.00086200  | -0.12468800 | 0.72403900  |
| O | 4.24388100  | -0.00349900 | 0.09463200  |
| O | 3.02944100  | -1.03993000 | 1.78146000  |
| C | 2.16775800  | 2.02125100  | -0.20617800 |
| C | 1.20753200  | 2.97769900  | -0.32166800 |
| C | 0.10447100  | 2.99542500  | 0.57539400  |
| C | 0.06345500  | 2.00032800  | 1.57551300  |
| C | 1.02841400  | 1.03551800  | 1.63194400  |
| N | 2.10099600  | 1.02960000  | 0.75947300  |
| H | 3.03761400  | 1.97458800  | -0.85018700 |
| H | 1.29518300  | 3.73116400  | -1.09493200 |
| H | -0.74961500 | 1.97025200  | 2.29171400  |
| H | 1.02531300  | 0.24421600  | 2.36993700  |
| C | -0.93722800 | 3.95322700  | 0.45201300  |
| N | -1.80332500 | 4.72107900  | 0.34542000  |
| H | 6.09063900  | -0.57409600 | 0.81951600  |
| H | 4.78525300  | -0.76547100 | 2.83502600  |
| H | 4.49928500  | -2.42012500 | 2.24587900  |
| H | 5.16160100  | -1.85886300 | 0.01123300  |

**TS3-iso2**

|   |             |             |             |
|---|-------------|-------------|-------------|
| C | 5.16612200  | -0.41378300 | 1.23672900  |
| C | 5.02207200  | -1.94753000 | 1.15112800  |
| B | 3.01393400  | -0.96370200 | 0.94086900  |
| O | 3.82515200  | 0.06137600  | 1.34287000  |
| O | 3.67234200  | -2.15148100 | 0.73026900  |
| C | 1.24096400  | -2.87553900 | -1.57039700 |
| C | 0.82548900  | -3.69315900 | -0.32530600 |
| B | -0.65779800 | -2.03529600 | -0.69189200 |

|   |             |             |             |   |             |             |             |
|---|-------------|-------------|-------------|---|-------------|-------------|-------------|
| O | 0.30035100  | -1.80417800 | -1.65323500 | C | -2.46913700 | 1.29274200  | 2.74375900  |
| O | -0.44325800 | -3.16727700 | 0.05548300  | H | -2.51147900 | 0.20755500  | 2.60462100  |
| C | -2.76342600 | -1.57038800 | 0.47165600  | H | -1.73572900 | 1.52856500  | 3.52663500  |
| C | -3.85195400 | -0.81700800 | 0.71545900  | H | -3.45722800 | 1.62764200  | 3.06479800  |
| C | -4.07063500 | 0.41868300  | -0.01424800 |   |             |             |             |
| C | -3.11268000 | 0.77379700  | -0.96132200 |   |             |             |             |
| C | -1.92323200 | 0.07931700  | -1.05006300 |   |             |             |             |
| N | -1.80554000 | -1.21248100 | -0.49123900 |   |             |             |             |
| H | -2.57546300 | -2.51296000 | 0.97102800  | C | -4.95926600 | 0.37158100  | 1.13586200  |
| H | -4.56918500 | -1.14041400 | 1.46065300  | C | -5.47153700 | 0.24173800  | -0.31427400 |
| H | -3.21432800 | 1.69974800  | -1.51944300 | B | -3.22723000 | 0.32480900  | -0.28640300 |
| H | -1.15488600 | 0.32992300  | -1.77210000 | O | -3.57109300 | 0.66194800  | 0.99643000  |
| C | 1.03123300  | 0.32362100  | 0.53593300  | O | -4.29748700 | -0.01075800 | -1.08298300 |
| C | -5.17791700 | 1.25562000  | 0.26792700  | C | -0.84853600 | 0.31030900  | 0.06890200  |
| N | -6.05507200 | 1.97269000  | 0.53765000  | H | -5.45051900 | 1.17355700  | 1.69102700  |
| H | 5.74171900  | -0.08747000 | 2.10503600  | H | -5.93841400 | 1.16808600  | -0.66644400 |
| H | 5.16734000  | -2.42730900 | 2.12445000  | H | -6.18005100 | -0.57957100 | -0.44265700 |
| H | 5.70375900  | -2.40004800 | 0.42820600  | H | -5.07053800 | -0.56494200 | 1.69292800  |
| H | 5.61766600  | 0.00569200  | 0.33151800  | O | -1.96637500 | 0.30347300  | -0.78918400 |
| H | 0.72425700  | -4.75988500 | -0.54238300 | C | -0.78725600 | -0.82999400 | 0.97364100  |
| H | 1.53493200  | -3.55633800 | 0.49477500  | C | -1.51851000 | -2.00431000 | 0.67315600  |
| H | 1.18858900  | -3.46212000 | -2.49314400 | C | 0.01900000  | -0.85701900 | 2.12664200  |
| H | 2.25271800  | -2.47319400 | -1.45998800 | C | -1.42708000 | -3.13313100 | 1.46910600  |
| O | 1.66556400  | -0.88475500 | 0.75671600  | H | -2.14045700 | -2.02981400 | -0.21458500 |
| C | 1.68766700  | 1.23132800  | -0.42573900 | C | 0.09833400  | -1.99414200 | 2.92810500  |
| C | 2.25659800  | 0.72575200  | -1.60190800 | H | 0.53974100  | 0.03580200  | 2.44566600  |
| C | 1.79140800  | 2.60216400  | -0.15580100 | C | -0.61041300 | -3.14311200 | 2.60347400  |
| C | 2.89654000  | 1.57832900  | -2.49534800 | H | -1.99694700 | -4.01800800 | 1.20290600  |
| H | 2.15359200  | -0.33074300 | -1.82453700 | H | 0.72066800  | -1.96965600 | 3.81755200  |
| C | 2.42992800  | 3.45058100  | -1.05188700 | H | -0.54015100 | -4.03007200 | 3.22406600  |
| H | 1.38981500  | 2.98756700  | 0.77635400  | C | -0.28954200 | 1.61013400  | 0.22342900  |
| C | 2.98344900  | 2.94167700  | -2.22548800 | H | -0.81547900 | 2.36111300  | -0.35825100 |
| H | 3.32073900  | 1.17723600  | -3.41027200 | C | 0.85305900  | 1.99611700  | 0.87784300  |
| H | 2.51022000  | 4.50917700  | -0.82687800 | H | 1.47707900  | 1.28832600  | 1.40944100  |
| H | 3.48395200  | 3.60487600  | -2.92344100 | N | 1.24155700  | 3.30788800  | 1.06745700  |
| C | -0.16075700 | 0.53644100  | 1.13971200  | C | 0.52799400  | 4.34732000  | 0.36240400  |
| H | -0.48152100 | -0.21833800 | 1.85260900  | H | -0.53821400 | 4.29213000  | 0.59681100  |
| C | -1.09133500 | 1.55157500  | 0.73785800  | H | 0.90420400  | 5.31921400  | 0.68759800  |
| H | -0.77455400 | 2.26839500  | -0.00941500 | H | 0.64821500  | 4.27015100  | -0.73091700 |
| N | -2.14765400 | 1.94141600  | 1.49153200  | C | 2.65081300  | 3.55983300  | 1.27422700  |
| C | -2.76724700 | 3.22544800  | 1.22429000  | H | 3.08897000  | 2.74500700  | 1.85781400  |
| H | -2.65983300 | 3.46293700  | 0.16299500  | H | 3.20525400  | 3.63794800  | 0.32458800  |
| H | -3.83495900 | 3.18216800  | 1.45227800  | H | 2.78324000  | 4.49433300  | 1.82590900  |
| H | -2.30197800 | 4.03044200  | 1.81016100  | C | -0.98954400 | -0.04889100 | -3.50716900 |

### TS-INT-AI

|   |             |             |             |
|---|-------------|-------------|-------------|
| C | -1.27765200 | -1.48759200 | -3.00127600 |
| B | 0.32286900  | -0.53086300 | -1.73766000 |
| O | 0.06614100  | 0.44145400  | -2.68568600 |
| O | -0.32532700 | -1.72661500 | -1.96726100 |
| C | 2.34739400  | 0.65517500  | -1.04216800 |
| C | 3.51081300  | 0.76503600  | -0.30771600 |
| C | 3.87233900  | -0.24303200 | 0.58946600  |
| C | 3.04140300  | -1.38949800 | 0.68315500  |
| C | 1.93863300  | -1.49424000 | -0.11403700 |
| N | 1.58501800  | -0.48867500 | -0.98602700 |
| H | 2.03871400  | 1.38288900  | -1.77967400 |
| H | 4.13314400  | 1.64341400  | -0.42764100 |
| H | 3.28353500  | -2.19503300 | 1.36498200  |
| H | 1.28438500  | -2.35814300 | -0.11175400 |
| C | 5.05190600  | -0.11947700 | 1.38572400  |
| N | 6.00444900  | -0.00967900 | 2.03826600  |
| H | -0.66035700 | -0.03486200 | -4.55104300 |
| H | -1.14314400 | -2.24083100 | -3.78322900 |
| H | -2.29005500 | -1.56928300 | -2.59370600 |
| H | -1.86531000 | 0.59466400  | -3.39502100 |

**TS-INT-AE**

|   |             |             |             |
|---|-------------|-------------|-------------|
| C | -3.97911500 | 3.68527800  | 0.17946400  |
| C | -4.28902800 | 3.35956200  | 1.65586800  |
| B | -2.74095900 | 1.94390600  | 0.86169800  |
| O | -3.18657700 | 2.58748300  | -0.26483800 |
| O | -3.29187200 | 2.41114000  | 2.02682300  |
| C | 4.12574600  | 3.98203300  | 0.88767100  |
| C | 3.36012900  | 3.99109000  | 2.23009300  |
| B | 2.98004200  | 2.06544900  | 1.13341100  |
| O | 3.98009500  | 2.65276400  | 0.39734100  |
| O | 2.53386200  | 2.83047400  | 2.18698800  |
| C | 1.44489900  | 0.19384300  | 1.60049800  |
| C | 0.93285400  | -1.02139600 | 1.31897400  |
| C | 1.40390200  | -1.78481100 | 0.19364600  |
| C | 2.57297700  | -1.25056200 | -0.47269500 |
| C | 3.04808800  | -0.02695900 | -0.16834900 |
| N | 2.49367700  | 0.75194400  | 0.85867000  |
| H | 1.08473200  | 0.80477900  | 2.41916900  |
| H | 0.11511500  | -1.39550400 | 1.92409000  |
| H | 3.05800700  | -1.82549600 | -1.25446700 |
| H | 3.89478200  | 0.42149400  | -0.67210800 |

|   |             |             |             |
|---|-------------|-------------|-------------|
| C | -1.06627800 | 0.66065400  | -0.24997100 |
| C | 1.01413900  | -3.13094500 | 0.01306300  |
| N | 0.65307700  | -4.21749300 | -0.20939400 |
| H | -4.87686000 | 3.76594400  | -0.43716300 |
| H | -5.27809400 | 2.90412200  | 1.77450800  |
| H | -4.22479600 | 4.23432500  | 2.30675400  |
| H | -3.39563100 | 4.60689600  | 0.07833000  |
| H | 4.03632300  | 3.91635700  | 3.08814900  |
| H | 2.73726000  | 4.88135000  | 2.35375600  |
| H | 5.18638500  | 4.21574700  | 1.00554300  |
| H | 3.68803900  | 4.67665500  | 0.16234200  |
| O | -1.84043800 | 0.92126500  | 0.86671800  |
| C | -0.26811100 | 1.78689700  | -0.74325600 |
| C | 0.04873300  | 1.93580600  | -2.10545800 |
| C | 0.14404300  | 2.79645700  | 0.14216100  |
| C | 0.78348100  | 3.02401500  | -2.55127000 |
| H | -0.31994800 | 1.20676000  | -2.81904900 |
| C | 0.86135900  | 3.89840700  | -0.31390800 |
| H | -0.08301200 | 2.70503400  | 1.20065200  |
| C | 1.19997100  | 4.01316200  | -1.65822800 |
| H | 1.01245500  | 3.11700600  | -3.60809800 |
| H | 1.15976400  | 4.66605100  | 0.39540800  |
| H | 1.76690600  | 4.86793900  | -2.01295500 |
| C | -1.16453600 | -0.59941400 | -0.77901400 |
| H | -1.93163200 | -1.23458300 | -0.34544000 |
| C | -0.23016800 | -1.18078100 | -1.66445500 |
| H | 0.64409100  | -0.61288000 | -1.96453700 |
| N | -0.48394900 | -2.27759800 | -2.41062100 |
| C | -1.68894500 | -3.05943400 | -2.19507300 |
| H | -2.56370800 | -2.40257700 | -2.23958500 |
| H | -1.76721500 | -3.80213700 | -2.99061400 |
| H | -1.66907800 | -3.58189300 | -1.23412400 |
| C | 0.57900600  | -2.86736100 | -3.20376400 |
| H | 1.33017600  | -2.10152000 | -3.41421300 |
| H | 1.05716600  | -3.70310600 | -2.68337500 |
| H | 0.17126300  | -3.22230900 | -4.15505000 |

**TS3-iso**

|   |             |            |            |
|---|-------------|------------|------------|
| C | -1.65324900 | 1.44090100 | 3.42394600 |
| C | -2.81018900 | 0.70196300 | 2.71559000 |
| B | -0.82842100 | 0.03837000 | 1.85093400 |
| O | -0.48736800 | 1.08073000 | 2.68889100 |

|   |             |             |             |            |             |             |             |
|---|-------------|-------------|-------------|------------|-------------|-------------|-------------|
| O | -2.17341500 | -0.26974700 | 1.89274000  | C          | 3.35133900  | 2.46675100  | 2.84874300  |
| C | -5.41942500 | -1.04292500 | -0.61545700 | H          | 2.95772600  | 1.78401400  | 3.60641700  |
| C | -5.59380200 | 0.38710100  | -0.06140500 | H          | 4.05255400  | 3.15175100  | 3.32851600  |
| B | -3.49447500 | 0.09098800  | -0.81209300 | H          | 2.50895800  | 3.04569600  | 2.43831400  |
| O | -4.15099500 | -1.02323900 | -1.26723900 | C          | 5.07711700  | 2.44345500  | 1.09850400  |
| O | -4.27507700 | 0.93332600  | -0.05444100 | H          | 5.57519800  | 1.76497100  | 0.40431300  |
| C | -1.47023400 | 1.45248600  | -0.53305300 | H          | 4.65965400  | 3.27576200  | 0.51513100  |
| C | -0.13652400 | 1.63046600  | -0.65351600 | H          | 5.81670200  | 2.83658100  | 1.80103900  |
| C | 0.66976000  | 0.67472000  | -1.36543600 |            |             |             |             |
| C | -0.04189900 | -0.35722200 | -2.07392900 |            |             |             |             |
| C | -1.37273300 | -0.50624300 | -1.91205800 | <b>TS3</b> |             |             |             |
| N | -2.13068600 | 0.37336200  | -1.12970000 |            |             |             |             |
| H | -2.10910700 | 2.13603500  | 0.01422200  | C          | 2.78265200  | -0.97016700 | 2.58613700  |
| H | 0.33433200  | 2.47780900  | -0.16817600 | C          | 3.96218200  | -0.31950300 | 1.84043300  |
| H | 0.50001100  | -1.05567700 | -2.69963300 | B          | 2.00797000  | 0.46441300  | 1.02715500  |
| H | -1.93827300 | -1.30166500 | -2.38072200 | O          | 1.64156100  | -0.22659100 | 2.16139300  |
| C | 1.31905300  | -0.65750300 | 0.76924100  | O          | 3.36131400  | 0.38395100  | 0.75824900  |
| C | 2.02204300  | 0.96352100  | -1.64789700 | C          | 3.86150200  | -0.86084700 | -2.06164100 |
| N | 3.15126400  | 1.20277900  | -1.81094800 | C          | 4.15567000  | -2.09104500 | -1.18025200 |
| H | -1.77503900 | 2.52692600  | 3.40619100  | B          | 1.99484200  | -1.51570000 | -1.00830500 |
| H | -3.40125300 | 1.36805700  | 2.07992700  | O          | 2.43657400  | -0.76401000 | -2.06641000 |
| H | -3.47838300 | 0.20037600  | 3.42081200  | O          | 2.97191800  | -2.27286600 | -0.39772700 |
| H | -1.53074800 | 1.11925600  | 4.46340400  | C          | 0.17205600  | -2.34227200 | 0.45553800  |
| H | -6.22999300 | 1.00328200  | -0.70512300 | C          | -1.12631300 | -2.39433000 | 0.80245200  |
| H | -5.99992700 | 0.39966200  | 0.95304100  | C          | -2.10684700 | -1.60453300 | 0.08605200  |
| H | -6.19619200 | -1.31712400 | -1.33240000 | C          | -1.65786000 | -0.84963600 | -0.99886300 |
| H | -5.39406300 | -1.78885100 | 0.18543000  | C          | -0.31356000 | -0.70870200 | -1.24182000 |
| O | 0.00026100  | -0.74930200 | 1.11948400  | N          | 0.63087700  | -1.51810900 | -0.58402100 |
| C | 1.74363200  | -1.82508400 | 0.00816400  | H          | 0.93719400  | -2.94108300 | 0.93392000  |
| C | 0.77215500  | -2.75540500 | -0.42486500 | H          | -1.43969200 | -3.04097000 | 1.61286400  |
| C | 3.08713000  | -2.08434500 | -0.32929600 | H          | -2.34990600 | -0.25224800 | -1.58394900 |
| C | 1.12742100  | -3.85475700 | -1.19527500 | H          | 0.06714300  | -0.16264200 | -2.09363500 |
| H | -0.26096200 | -2.60497200 | -0.14160400 | C          | -0.14153000 | 1.36146000  | 0.17046000  |
| C | 3.43037000  | -3.18392500 | -1.10228000 | C          | -3.47559900 | -1.64370900 | 0.45403300  |
| H | 3.87993600  | -1.45398300 | 0.04416800  | N          | -4.58796300 | -1.65340200 | 0.79496400  |
| C | 2.45516000  | -4.07161200 | -1.55383900 | H          | 2.65513300  | -2.01620400 | 2.29050600  |
| H | 0.35741300  | -4.55144900 | -1.51284400 | H          | 4.66389100  | -1.06307200 | 1.45616600  |
| H | 4.47444800  | -3.35362900 | -1.34538900 | H          | 4.50592200  | 0.39304700  | 2.46996200  |
| H | 2.73025700  | -4.92913300 | -2.15898000 | H          | 2.87507800  | -0.90769300 | 3.67254700  |
| C | 2.10500300  | 0.32530900  | 1.44325200  | H          | 4.32505200  | -2.99429200 | -1.77578400 |
| H | 1.57347600  | 0.86049100  | 2.21877600  | H          | 5.01391300  | -1.93767400 | -0.52168700 |
| C | 3.37435100  | 0.74143800  | 1.14652200  | H          | 4.22166900  | -0.97968400 | -3.08578100 |
| H | 3.92800600  | 0.35081400  | 0.30638200  | H          | 4.27210400  | 0.05298300  | -1.62513900 |
| N | 4.04667300  | 1.72061800  | 1.82386600  | O          | 1.22386000  | 1.21497600  | 0.21417700  |



|   |             |             |             |   |             |             |             |
|---|-------------|-------------|-------------|---|-------------|-------------|-------------|
| C | -0.54339600 | 2.25839300  | -0.92527400 | H | -5.59814700 | 1.53414200  | -0.44408100 |
| C | 0.27788100  | 2.38047600  | -2.06306200 | H | -6.95353700 | 0.79246100  | -1.33274000 |
| C | -1.70637900 | 3.04161900  | -0.86651400 | H | -5.40042500 | 1.05735400  | -2.14583200 |
| C | -0.07880400 | 3.21521000  | -3.11143900 | N | -5.45481200 | -0.55459000 | -0.82565500 |
| H | 1.19657900  | 1.80337500  | -2.11072300 | O | -1.49636000 | -1.59041600 | -0.43832000 |
| C | -2.06070600 | 3.87293900  | -1.92421400 | C | 0.98318300  | -3.51533200 | -2.13978300 |
| H | -2.31154200 | 3.04026000  | 0.03183000  | C | 0.75656400  | -4.30548200 | -0.83124800 |
| C | -1.25767700 | 3.95942800  | -3.05677700 | B | -0.56846600 | -2.48969200 | -0.88386400 |
| H | 0.56820700  | 3.28595400  | -3.98029000 | O | -0.05616300 | -2.53426500 | -2.15354400 |
| H | -2.96398600 | 4.47065600  | -1.85082300 | O | -0.11064500 | -3.48002200 | -0.05457700 |
| H | -1.53724800 | 4.60743200  | -3.88073700 | H | 0.90435100  | -4.13891600 | -3.03296700 |
| C | -0.87826500 | 1.05291700  | 1.33844600  | H | 1.95225900  | -3.00480300 | -2.13869800 |
| H | -0.28330000 | 0.77011800  | 2.19700200  | H | 1.68725500  | -4.46890300 | -0.28271900 |
| C | -2.24710300 | 0.93537800  | 1.44621200  | H | 0.26653900  | -5.26853400 | -1.00882800 |
| H | -2.90043700 | 1.15090400  | 0.60710400  | H | 0.55143800  | -0.79435400 | 0.63174900  |
| N | -2.90836700 | 0.57455200  | 2.57687600  | C | 2.54350300  | -1.17602000 | -0.10002600 |
| C | -2.16304200 | 0.23737700  | 3.76739000  | C | 2.82301600  | -2.13572600 | 0.90070600  |
| H | -1.68091200 | 1.11717400  | 4.21888900  | C | 3.56299900  | -0.87888600 | -1.03437500 |
| H | -2.84304500 | -0.20451400 | 4.49740400  | C | 4.05234600  | -2.77481000 | 0.95233000  |
| H | -1.38521600 | -0.49368500 | 3.52525900  | H | 2.04151000  | -2.38387900 | 1.61499900  |
| C | -4.32217300 | 0.85835600  | 2.72524300  | C | 4.79233600  | -1.52128100 | -0.97080300 |
| H | -4.77583400 | 0.95725100  | 1.73891800  | H | 3.38498600  | -0.12964100 | -1.80069700 |
| H | -4.81800200 | 0.02529200  | 3.22894900  | C | 5.04529500  | -2.47429700 | 0.01646200  |
| H | -4.49323900 | 1.78159900  | 3.29758900  | H | 4.24154800  | -3.51439200 | 1.72459300  |

### TS-INT13

|   |             |             |             |   |             |             |             |
|---|-------------|-------------|-------------|---|-------------|-------------|-------------|
| C | 1.27158000  | -0.52140500 | -0.13380800 | H | 5.56284100  | -1.27346700 | -1.69420800 |
| C | 0.78113200  | 0.21419100  | -1.34678000 | H | 6.00677500  | -2.97471800 | 0.05932500  |
| C | -0.70064300 | 0.47813800  | -1.36912600 | C | -2.29691800 | 0.04376900  | 2.40727000  |
| H | 1.05909300  | -0.35627200 | -2.24708200 | C | -3.06349600 | 1.33658200  | 2.06253000  |
| H | 1.31037700  | 1.17528300  | -1.44116900 | B | -0.89630700 | 1.56537800  | 1.55059000  |
| H | -1.01975000 | 1.43713200  | -1.76793600 | O | -0.91613300 | 0.40058400  | 2.26623200  |
| C | -1.69790300 | -0.34200700 | -0.99154500 | O | -2.12191200 | 2.13407000  | 1.33588300  |
| C | -3.10356800 | 0.04575100  | -1.04463000 | C | 0.33088300  | 3.29138600  | 0.29006700  |
| H | -3.30119100 | 1.06409800  | -1.36069300 | C | 1.44858200  | 3.74244100  | -0.31487000 |
| C | -4.10296200 | -0.80290100 | -0.72885100 | C | 2.69523100  | 3.03685200  | -0.13087000 |
| H | -3.85575100 | -1.80602500 | -0.38942200 | C | 2.71672400  | 1.95208700  | 0.75184500  |
| C | -6.32496800 | -1.24764000 | 0.10410800  | C | 1.55057900  | 1.48734800  | 1.32310900  |
| H | -7.34160900 | -1.27904400 | -0.29613500 | N | 0.33934400  | 2.15471400  | 1.10065800  |
| H | -5.97495600 | -2.27427500 | 0.23262900  | H | -0.63634900 | 3.76762400  | 0.18654000  |
| H | -6.35768900 | -0.76688400 | 1.09460100  | H | 1.40951600  | 4.62653900  | -0.93827400 |
| C | -5.87009400 | 0.77788900  | -1.19914500 | H | 3.64153500  | 1.42283800  | 0.95220600  |
|   |             |             |             | H | 1.54017800  | 0.74318000  | 2.10693500  |
|   |             |             |             | C | 3.87612500  | 3.45923000  | -0.80099800 |
|   |             |             |             | N | 4.83519900  | 3.80680700  | -1.35695200 |
|   |             |             |             | H | -2.51805500 | -0.76141500 | 1.70087400  |

|   |             |             |            |
|---|-------------|-------------|------------|
| H | -2.47819700 | -0.29864300 | 3.42815900 |
| H | -3.37214900 | 1.88703900  | 2.95741900 |
| H | -3.93393700 | 1.14261800  | 1.43205800 |
